# Supplementary material for: Identification of Differentially Expressed Genes Related to Floral Bud Differentiation and Flowering Time in Three Populations of Lycoris radiata
Source: Int J Mol Sci. 2022 Nov 14;23(22):14036. doi: 10.3390/ijms232214036 (PMC9699370; doi:10.3390/ijms232214036)
Supplement: Supplementary file 1 [file ijms-23-14036-s001.zip › Table S1 Primer Sequence List.xlsx]

## Sheet: Sheet1
Gene	Primer name	Primer sequence(5' - 3')
EXP1	EXP1-F	TTGATGTTGACAAGGTAAGGTGC
	EXP1-R	AGGCAGGAAATCTCCAAAGC
CO14	CO14-F	CGGATCAGAATGGGAGGA
	CO14-R	TCAGCACGGCAGTAGAT
FLC	FLC-F	ATGACGAGGAGGTGAGATG
	FLC-R	CATCGCCTCTAGCACAATAC
FT	FT-F	CCACAGCTGAGGGTTTAAG
	FT-R	CAAGGAGTGTGGCCATTAG
SVP	SVP-F	CTGCCACTGGGAAACTATATG
	SVP-R	GTTGCTCTAGCCTTGGTATTT
SPL7	SPL7-F	GAGTCGAAGAGGAGCTGTA
	SPL7-R	GTGGTGCCGTTGGATTT
SPL8	SPL8-F	CACTGAGACTTCGTCATTCC
	SPL8-R	TCCATCTTCGGGCTCAT
SPL9	SPL9-F	CACCTCCTGGTCCTCTATC
	SPL9-R	AGGTGGTAATAGAAGGGAAGA
VIN3	VIN3-F	CACCTTCCCGCAACAAA
	VIN3-R	CGGTGAATCGTGTGGTATG
FRI	FRI-F	AGAACCTCTCCGATCACTT
	FRI-R	TGTTGGGTTTCGGATTCTAC
GI	GI-F	GGTGAGAGGAATGGCATTTA
	GI-R	CAGTCACCTTTCGGCTATG
CO1	CO1-F	CTTGCGAGTCGAGGATTG
	CO1-R	CGTGTGATCGTGAAATCTACT
SOC1	SOC1-F	CAGCATCACAAAGAACAGAAAG
	SOC1-R	GGGAAGAGTGAGGTGAAGA
