# Supplementary material for: Identification of Differentially Expressed Genes Related to Floral Bud Differentiation and Flowering Time in Three Populations of Lycoris radiata
Source: Int J Mol Sci. 2022 Nov 14;23(22):14036. doi: 10.3390/ijms232214036 (PMC9699370; doi:10.3390/ijms232214036)
Supplement: Supplementary file 1 [file ijms-23-14036-s001.zip › Table S2 The comparisons of DEGs between development stages and among three populations.xlsx]

## Sheet: E1 vs E2
Gene ID	E1_r1 FPKM	E1_r2 FPKM	E1_r3 FPKM	E2_r1 FPKM	E2_r2 FPKM	E2_r3 FPKM
CL1.Contig4_All	1.36	1.16	1.11	2.23	1.9	2.18
CL10.Contig2_All	8.45	8.66	8.44	1.23	2.12	1.36
CL10.Contig3_All	2.94	2.15	2.57	18.05	19.18	20.02
CL10.Contig4_All	8.28	9.69	10.16	20.62	20.87	24.28
CL100.Contig3_All	1.35	0.9	1.28	2.42	2.4	2.11
CL100.Contig6_All	0.4	0.26	0.38	1.27	1.46	0.97
CL1000.Contig1_All	2.7	2.8	2.88	2.52	2.2	1.91
CL1000.Contig2_All	2.87	3.23	4.27	1.75	1.88	0.96
CL1000.Contig3_All	2.49	3.12	2.99	1.86	1.82	1.55
CL1000.Contig4_All	5	4.89	4.34	2.53	1.76	2.67
CL1000.Contig5_All	3.32	3.73	3.27	2.79	2.26	2.64
CL10000.Contig3_All	7.23	8.11	6.66	3.86	4.09	4.14
CL10001.Contig1_All	0.75	0.41	0.22	0.93	1.2	1.16
CL10001.Contig2_All	0.58	0.57	0.28	1.37	1.45	0.84
CL10001.Contig4_All	1.83	1.6	2.22	5.83	4.23	4.67
CL10001.Contig6_All	0.65	1.11	0.92	2.37	2.66	2.55
CL10002.Contig2_All	3.25	2.68	1.69	1.81	1.63	1.71
CL10002.Contig4_All	2.41	2.1	2.31	3.49	3.52	4.18
CL10003.Contig1_All	1.43	1.82	2.26	7.12	8.54	9.6
CL10003.Contig2_All	47.11	41.82	48.24	34.18	34.45	39.56
CL10008.Contig2_All	0.5	1.07	0.71	2.02	1.64	1.75
CL10008.Contig3_All	3.67	3.12	4.37	7.39	8.86	7.93
CL10009.Contig3_All	1.42	2.21	1.76	0	0	0
CL10009.Contig4_All	2.19	2.31	2.25	4.67	3.47	4.41
CL1001.Contig12_All	1.94	1.62	1.83	0.16	0.26	0.03
CL1001.Contig13_All	1.94	2.31	2.54	0.11	0.26	0.2
CL1001.Contig14_All	0	0	0	1.53	0.85	1.76
CL1001.Contig15_All	4.83	4.88	5.67	8.86	8.08	9.22
CL1001.Contig19_All	8.24	8.17	7.31	10.12	12.59	11.38
CL1001.Contig1_All	1.65	1.68	0.79	0.02	0.05	0.05
CL1001.Contig20_All	1.33	1.39	1.33	0.19	0.06	0.14
CL1001.Contig22_All	13.24	16.18	13.9	20.46	21.18	21.97
CL1001.Contig23_All	2.33	2.56	3.14	0.75	0.59	0.47
CL1001.Contig25_All	10.29	13.55	13.69	25.72	23.51	22.67
CL1001.Contig26_All	1.18	2.39	2.41	1	1.06	1.18
CL1001.Contig27_All	8.89	9.28	8.14	5.69	5.38	3.53
CL1001.Contig28_All	61	61.08	59.79	49.41	48.85	52.11
CL1001.Contig29_All	0.37	0.26	0.46	0	0.2	0.09
CL1001.Contig2_All	4.05	4.3	3.72	7.93	8.36	7.27
CL1001.Contig5_All	2.13	1.84	2.09	1.59	1.54	1.41
CL1001.Contig6_All	5.42	5.53	4.61	9.56	11.16	10.32
CL1001.Contig7_All	0.09	0.11	0.11	1.37	0.62	1.18
CL10010.Contig1_All	4.32	4.43	4.51	9.65	8.3	8.18
CL10010.Contig3_All	4.39	5.02	4.79	1.33	1.81	2.41
CL10010.Contig5_All	35.31	36.85	34.21	30.3	28.66	29.28
CL10010.Contig6_All	16.84	17.63	16.25	13.31	12.89	13.33
CL10011.Contig1_All	21.25	24.78	22.73	19.53	17.13	19.3
CL10013.Contig1_All	2.72	2.27	2.75	1.05	0.95	0.94
CL10013.Contig2_All	1.72	1.08	1.1	4.39	5.18	4.51
CL10013.Contig4_All	3.12	2.95	2.79	2.48	1.52	1.78
CL10013.Contig7_All	1.56	1.7	1.25	5.18	4.84	4.86
CL10013.Contig8_All	0.14	0.09	0.85	0	0	0
CL10015.Contig1_All	3.42	3.53	2.67	1.86	1.93	2.13
CL10016.Contig2_All	7.38	7.7	7.94	13.22	14.7	12.21
CL10016.Contig3_All	6.38	7.93	7.12	3.74	2.99	3.47
CL10019.Contig2_All	1.63	1.05	2.05	0.44	1.1	0.76
CL10019.Contig3_All	1.5	1.75	1.32	0.86	0.56	0.84
CL10019.Contig5_All	1.31	1.42	1.42	2.76	2.19	2.82
CL1002.Contig1_All	2.63	3.84	3.77	17.09	15.96	18.96
CL1002.Contig3_All	32.59	32.83	28.38	26.55	25.07	27.7
CL1002.Contig4_All	106.64	102.79	100.27	99.92	98.55	97.65
CL1002.Contig5_All	106.19	109.49	112.51	10.63	11.27	12.64
CL10021.Contig10_All	2.85	3.65	2.77	6.21	7.15	6.74
CL10021.Contig11_All	25.44	30.81	27.21	81.52	90.81	87.96
CL10021.Contig13_All	4.86	6.69	4.62	56.85	55.99	55.99
CL10021.Contig14_All	1.89	1.64	1.42	0.07	0.05	0.04
CL10021.Contig15_All	2.94	3.39	2.67	9.15	8.79	6.91
CL10021.Contig16_All	3.22	3.93	3.89	15.42	15.4	15.58
CL10021.Contig17_All	11.78	10.77	10.38	26.49	26.83	26.84
CL10021.Contig18_All	0.46	0.48	0	2.76	2.21	2.17
CL10021.Contig19_All	0.17	0.6	0.47	4.58	4.33	4.48
CL10021.Contig1_All	3.89	4.58	3.34	0.23	0.49	0.28
CL10021.Contig20_All	0.26	0.09	1.02	0	0	0
CL10021.Contig21_All	1.48	1.47	0.32	0	0	0
CL10021.Contig23_All	7.07	8.43	7.72	0.31	0.31	0.45
CL10021.Contig24_All	36.11	35.98	32.69	67.53	68.71	70.59
CL10021.Contig25_All	64.39	63.67	63.48	191.75	190.99	195.94
CL10021.Contig26_All	17.91	16.26	16.04	22.22	22.35	23.7
CL10021.Contig6_All	1.51	0.98	1.56	30.77	28.03	26.54
CL10021.Contig7_All	0	0	0	0.86	1.62	1.54
CL10021.Contig8_All	0.8	0.8	0.74	32.53	29.41	31.67
CL10022.Contig1_All	4.37	4.09	3.38	0	0.17	0.32
CL10022.Contig3_All	0.17	0.09	0.22	1.41	0.9	0.77
CL10022.Contig4_All	2.83	2.19	2.85	0.31	0.45	0.39
CL10022.Contig5_All	0	0	0	3.08	3.2	2.79
CL10025.Contig3_All	3.33	4.54	3.37	5.84	5.97	7.94
CL10026.Contig2_All	2.11	2	1.34	4.44	4.61	4.45
CL10026.Contig3_All	7.82	8.16	9.05	5.86	5.99	6.16
CL10026.Contig4_All	11.53	12.94	11.33	8.26	7.7	6.97
CL10029.Contig2_All	8.08	8.05	7.73	7.37	7.76	7.57
CL10030.Contig2_All	16.45	16.89	14.98	7.39	6.01	6.08
CL10033.Contig1_All	3.58	4.21	4.04	6.98	6.68	6.62
CL10033.Contig3_All	6.94	7.44	7.94	12.68	12.52	13.12
CL10033.Contig4_All	3.05	3.47	3.46	5.84	6.22	5.15
CL10035.Contig1_All	3.71	4.14	4.41	0.04	0.08	0
CL10036.Contig3_All	10.89	10.03	13.86	5.03	3.98	4.36
CL10037.Contig13_All	0.53	0.31	0.26	0.08	0.19	0.1
CL10037.Contig14_All	0.46	0.65	0.4	0	0	0
CL10037.Contig16_All	0.06	0	0.22	0	0	0
CL10037.Contig1_All	1.64	1.32	0.84	0.44	0.24	0.45
CL10037.Contig25_All	1.53	1.36	1.52	3.03	3.73	3.47
CL10037.Contig26_All	0.9	1.6	1.79	0.95	0.7	0.91
CL10037.Contig28_All	0.34	0.22	0.3	0	0	0
CL10037.Contig36_All	0.07	0	0.05	0.68	0.7	0.46
CL10037.Contig37_All	18.35	17.98	19.27	17.17	17.05	18.36
CL10037.Contig38_All	5.16	5.6	3.14	0	0	0
CL10037.Contig4_All	1.88	1.68	3.1	0.12	0	0
CL10037.Contig5_All	0.34	0.54	0.53	0.96	1.85	1.13
CL10037.Contig7_All	1.4	1.02	2.2	0.3	0.11	0.2
CL10038.Contig1_All	2.11	1.91	1.47	1.29	1.29	1.37
CL10038.Contig2_All	5.13	4.6	4.12	1.83	1.38	1.62
CL1004.Contig1_All	1.36	0.88	1.73	0.12	0.13	0.21
CL1004.Contig6_All	0.3	0.77	0.66	2.31	2.27	1.65
CL1004.Contig7_All	0.33	0.37	0.21	0.05	0	0
CL10041.Contig1_All	0.46	0.64	0.16	2.24	2.11	1.75
CL10043.Contig12_All	5.31	4.33	4.84	1.5	1.45	1.55
CL10043.Contig13_All	0	0.02	0	0.27	0.27	0.16
CL10043.Contig14_All	0.55	0.47	0.52	3.35	3.05	2.81
CL10043.Contig18_All	0.5	0.67	0.3	0	0.06	0.1
CL10043.Contig19_All	0.07	0.08	0.12	0.35	0.53	0.45
CL10043.Contig27_All	2.33	1.34	3.42	0.31	0.3	0.1
CL10043.Contig28_All	1.03	1.91	1.02	0.49	0.83	0.66
CL10043.Contig29_All	0.28	0	0.23	1.86	2.08	2.22
CL10043.Contig35_All	3.76	4.5	4.53	2.08	1.35	1.43
CL10043.Contig36_All	5.92	5.16	5.9	2.97	3.77	4.01
CL10043.Contig3_All	0.27	0.22	0.21	1.15	0.82	0.74
CL10043.Contig4_All	0.67	0.67	0.85	1.48	1.46	1.02
CL10043.Contig6_All	1.2	0.54	0.62	0.11	0.48	0.27
CL10044.Contig1_All	0.24	0.73	0.65	1.49	1.88	1.12
CL10044.Contig2_All	0.96	0.87	0.67	3.04	2.89	3.12
CL10045.Contig3_All	23	21.48	21.38	19.93	22.87	20.1
CL10046.Contig1_All	5.79	6.04	3.98	1.27	1.34	1.7
CL10048.Contig1_All	0	0	0	0.09	0.13	0.09
CL10048.Contig3_All	1.03	0.91	1.03	3.39	3.41	5.03
CL10049.Contig3_All	1.44	2.05	1.85	1.49	1.35	1.37
CL10050.Contig4_All	3.41	4.01	4.02	1.62	1.96	1.39
CL10050.Contig5_All	8.57	8.51	8.79	6.62	5.91	7.5
CL10051.Contig1_All	0.07	0.06	0.05	0.66	0.8	0.85
CL10051.Contig2_All	0.27	0.42	0.1	1.12	1.09	1.05
CL10051.Contig4_All	1.04	0.58	0.84	2.38	1.92	2.09
CL10051.Contig5_All	5.91	6.01	5.87	3.24	2.81	3.05
CL10052.Contig1_All	13.46	11.5	11.81	0.84	1.43	1.4
CL10052.Contig2_All	1.49	1.25	1.01	9.86	9.68	9.22
CL10052.Contig3_All	0.26	0.58	0.32	5.06	5.36	6.64
CL10052.Contig4_All	17.84	14.84	19.3	27.78	26.74	28.07
CL10052.Contig5_All	3.49	4.12	4.12	12.47	10.2	11.31
CL10053.Contig1_All	1.38	1.61	1.59	3.98	2.77	3.91
CL10053.Contig2_All	2.9	3.13	3.12	4.55	5.25	4.6
CL10056.Contig1_All	0.62	0.99	1.01	0	0	0
CL10056.Contig3_All	0.6	0.55	0.14	4.01	5.73	5.25
CL10056.Contig6_All	3.3	2.61	3.34	0.13	0.22	0.17
CL10058.Contig5_All	4.89	3.4	4.84	1.39	0.78	1.64
CL10059.Contig2_All	1.28	3.76	2.77	0	0	0
CL1006.Contig1_All	2.83	3.14	2.82	1.8	2.09	1.96
CL1006.Contig2_All	5.81	6.28	6.3	2.75	2.38	2.36
CL1006.Contig3_All	6.78	6.55	7.1	9.45	8.94	9.71
CL10060.Contig1_All	9.82	10.02	9.87	8.65	8.98	8.78
CL10061.Contig2_All	8.29	7.83	7.89	4.6	4.91	4.83
CL10062.Contig1_All	1.93	2.48	3.43	6.74	8.32	7.48
CL10062.Contig2_All	9.12	8.82	8.95	14.99	15.3	14.88
CL10063.Contig1_All	0.94	0.69	0.89	5.12	3.16	4.23
CL10063.Contig4_All	16.17	17.2	16.76	14.92	14.28	16.56
CL10064.Contig1_All	1.25	2.09	2.32	4.28	2.91	4.22
CL10064.Contig3_All	0.42	0.59	0.31	0.07	0	0
CL10064.Contig4_All	13.13	13.22	11.98	12.02	11.07	11.62
CL10064.Contig5_All	9.35	8.88	8.01	7.21	6.96	8.02
CL10066.Contig2_All	4.81	5.34	4.03	15.63	16.62	14.47
CL10071.Contig2_All	1.1	0.8	1.1	2.28	1.8	2.26
CL10072.Contig2_All	3.86	4.16	4.38	1.96	2.54	2.08
CL10072.Contig3_All	2.63	2.08	2.52	6.89	6.53	6.11
CL10072.Contig4_All	1.93	1.64	2.08	0.6	0.76	0.71
CL10072.Contig5_All	6.79	6.52	5.93	0.88	0.89	1.04
CL10072.Contig6_All	2.62	3.34	3.2	0.98	0.89	1.7
CL10073.Contig1_All	0	0.25	0	1.99	1.82	0.68
CL10075.Contig1_All	3.81	3.9	3.29	2.29	2.61	3.1
CL10075.Contig2_All	7.41	6.18	7.2	10.69	10.33	8.7
CL10078.Contig7_All	4.75	5.86	5.99	8.05	8.05	8.79
CL10079.Contig1_All	1.51	1	1.12	3.05	3	1.97
CL10083.Contig3_All	4.59	6.1	5.61	8.35	7.26	8.83
CL10083.Contig6_All	1.63	1.67	2.42	0.5	0.97	1.16
CL10084.Contig1_All	0.72	0.93	1.16	7.53	6.28	6.99
CL10087.Contig3_All	3.09	2.35	2.35	8.35	6.58	7.48
CL10089.Contig1_All	1.09	1.15	1.49	3.56	2.23	4.03
CL10090.Contig3_All	2.38	2.39	3.52	7.21	5.48	6.55
CL10090.Contig6_All	6.92	5.38	5.93	2.48	2.79	3.26
CL10090.Contig7_All	6.45	6.43	6.25	9.33	9.32	9.58
CL10091.Contig2_All	2.53	2.64	2.16	5.4	5.43	4.9
CL10092.Contig5_All	1.59	1.4	1.66	2.64	3.53	2.75
CL10093.Contig1_All	0.1	0.3	0.2	1.61	1.12	1
CL10094.Contig2_All	23.43	24.09	23.72	33.08	33.68	33.76
CL10095.Contig2_All	2.79	1.97	1.81	3.89	4.34	3.44
CL10096.Contig2_All	0	0	0	0.81	2.88	2.02
CL10096.Contig3_All	0.2	0.38	0.22	0	0	0
CL10096.Contig4_All	1.73	1.28	0.79	3.02	3.57	3.46
CL10097.Contig1_All	0	0	0.18	8.71	7.1	7.39
CL10097.Contig2_All	2.9	5.31	4.01	3.08	3.73	2.26
CL10097.Contig4_All	2.78	3.26	2.93	2.17	1.64	2
CL10097.Contig5_All	15.31	13.44	13.94	22.09	20.89	22.2
CL10099.Contig1_All	0.68	0.14	0.18	3.82	2.14	4.1
CL10099.Contig2_All	3.84	3.99	3.83	20.35	18.85	18.21
CL10099.Contig3_All	1.46	1.47	1.34	6.24	6.51	5.95
CL10099.Contig4_All	8.01	11.75	9.62	7.6	8.86	7.98
CL10101.Contig2_All	1.92	2.73	2.37	0.18	0.37	0.54
CL10103.Contig2_All	3.81	4.61	5.14	1.89	2.71	3.07
CL10103.Contig3_All	4.17	3.29	3.65	0	0	0
CL10103.Contig4_All	1.74	2.31	1.52	0	0	0
CL10104.Contig3_All	2.36	2.4	2.52	0.7	1.06	0.99
CL10106.Contig6_All	0.49	0.11	0.17	0.55	1.24	1.04
CL10106.Contig8_All	0	0	0	0.75	0.8	0.79
CL10107.Contig5_All	1.89	2.42	2.24	1.36	0.88	1.62
CL10108.Contig5_All	1.68	1.04	1.22	0.38	0.28	0.58
CL10108.Contig6_All	12.11	9.6	11.26	7.21	5.52	9.09
CL10108.Contig7_All	0.41	0.72	0.62	1.75	1.18	1.59
CL10109.Contig1_All	5.67	7.21	5.88	4.28	3.97	3.18
CL10109.Contig3_All	2.45	2.27	2.97	9.74	9.67	10.59
CL1011.Contig11_All	23.08	24.13	22.24	30.32	34.44	32.44
CL1011.Contig1_All	0	0	0	9.17	8.27	8.02
CL1011.Contig2_All	3.36	1.71	2.3	1.63	1.04	1.3
CL1011.Contig4_All	8.02	4.81	7.67	0.9	0.31	0.95
CL1011.Contig5_All	11.64	13.64	12.44	24.23	21.36	23.47
CL1011.Contig6_All	59	59.38	54.4	95	96.47	93.54
CL1011.Contig9_All	29.64	28.89	29.83	0	0	0
CL10110.Contig1_All	3.63	5.54	4.3	1.59	2.12	1.11
CL10110.Contig2_All	1.89	1.07	1.85	7.4	6.91	5.32
CL10111.Contig13_All	0.29	0.52	0.25	0.91	1.04	1.44
CL10111.Contig3_All	3.69	2.9	3.27	2.69	3.28	2.48
CL10111.Contig4_All	1.17	1.1	0.95	0.53	0.65	0.87
CL10111.Contig5_All	0.4	0.28	0.44	0.68	1.16	0.94
CL10115.Contig1_All	16.93	18.51	16.92	23.41	26.06	23.47
CL10115.Contig2_All	2.81	3.01	3.06	6.28	6.83	6.71
CL10117.Contig6_All	2.67	2.03	2.24	1.81	1.1	1.57
CL10117.Contig7_All	8.92	9.16	7.69	11.82	11.93	11.34
CL10118.Contig1_All	6.03	5.67	7.32	8.88	10.37	9.33
CL10118.Contig3_All	0.25	0.09	0.18	0.48	0.82	0.81
CL10118.Contig4_All	6.28	6.96	6.84	10.24	10.48	10.07
CL1012.Contig3_All	1.59	1.11	1.63	0.66	0.55	0.6
CL1012.Contig4_All	4.05	3.79	5.66	11.27	12.01	11.53
CL1012.Contig5_All	4.06	4.52	3.84	7.59	7.45	6.61
CL10120.Contig1_All	0.46	0.34	0	3.62	3.77	2.82
CL10120.Contig2_All	3.36	2.96	2.68	1.74	0.55	0.76
CL10121.Contig1_All	0.33	1.54	1.55	0	0	0
CL10122.Contig1_All	1.6	2.51	2.1	0	0	0
CL10122.Contig2_All	10.31	7.83	9.54	24.24	22.48	22.72
CL10123.Contig6_All	15.22	15.82	15.46	26.48	25.41	25.1
CL10123.Contig7_All	3.06	4.04	5.05	5.39	7.33	6.91
CL10126.Contig2_All	2.11	1.46	1.76	3.86	3.33	3.7
CL10127.Contig5_All	2.56	3.08	2.2	4.69	4.51	5.08
CL10129.Contig1_All	1.68	1.52	2.5	0.07	0	0.47
CL1013.Contig2_All	1.61	1.69	1.91	0.67	0.3	0.92
CL1013.Contig6_All	1.91	1.39	2.35	0.66	0.89	0.61
CL10130.Contig6_All	7.39	6.7	7.57	6.12	6.28	6.77
CL10131.Contig2_All	1.82	2.31	1.95	8.35	6.91	7.99
CL10131.Contig3_All	14.46	14.62	15.72	13.58	13.36	13.62
CL10131.Contig4_All	11.56	12.06	12.05	18.55	17.52	17.12
CL10131.Contig5_All	30.65	31.45	33.58	23.83	28.64	25.59
CL10132.Contig1_All	16.26	14.64	16.49	28.77	24.99	28.03
CL10132.Contig2_All	7.63	6.16	6.21	10.09	11.19	12.67
CL10132.Contig3_All	1.8	2.11	1.81	8.29	7.85	8.89
CL10132.Contig4_All	25.03	28.44	23.57	23.8	20.25	23.61
CL10133.Contig2_All	2.4	1.3	2.29	0.63	0.73	1.07
CL10134.Contig2_All	13.15	11.72	15.16	2.36	3.07	1.26
CL10134.Contig3_All	11.52	12.4	12.6	21.68	19.73	22.02
CL10137.Contig3_All	3.64	3.08	2.73	1.57	1.87	2.76
CL10137.Contig4_All	18.58	18	19.67	3.76	3.56	3.04
CL10137.Contig5_All	2.5	2.77	2.61	4.32	5.48	5.08
CL10139.Contig1_All	8.35	8.28	9.24	18.04	13.7	16.16
CL1014.Contig1_All	0.12	0.17	0.2	1.1	0.59	0.41
CL1014.Contig2_All	8.53	9.23	8.62	6.13	6.07	4.7
CL1014.Contig3_All	0.82	1.13	0.93	3.22	3.21	3.36
CL1014.Contig4_All	1.3	1.26	1.16	2.37	2.78	2.57
CL1014.Contig6_All	0.44	0.57	0.41	1.59	1.4	1.6
CL1014.Contig7_All	1.82	2.04	1.65	2.68	3.36	3.17
CL10142.Contig3_All	6.74	7.56	6.21	5.5	4.97	4.56
CL10142.Contig4_All	0	0.72	0.46	2.17	2.93	3.62
CL10144.Contig3_All	3.81	3.71	4.09	2.32	2.49	2.91
CL10145.Contig2_All	1.67	1.21	2.2	1.12	0.68	0.49
CL10145.Contig3_All	3.17	2.7	2.89	0.53	0.62	0.79
CL10146.Contig1_All	1.99	2.06	1.4	0.93	0.93	0.78
CL10146.Contig2_All	2.04	1.22	1.71	5.07	5.23	5.43
CL10146.Contig3_All	2.37	2.23	1.98	1.21	1.47	0.88
CL10147.Contig2_All	2.78	2.74	3.14	4.95	6.96	5.47
CL10148.Contig2_All	3.62	4.26	4.23	6.64	6.56	6.17
CL10149.Contig2_All	6.81	7.16	6.65	4.87	3.76	2.96
CL10149.Contig4_All	2.73	2.97	1.49	1.16	1.05	0.94
CL10149.Contig6_All	28.33	26.97	25.4	46.27	43.25	42.2
CL10149.Contig7_All	2.89	3.2	4.13	8.4	8.68	7.8
CL1015.Contig2_All	0.93	0.43	0.95	0	0	0
CL1015.Contig3_All	3.34	3.44	2.94	0	0	0
CL1015.Contig7_All	0.51	1.07	0.27	3.23	3.28	2.93
CL10150.Contig1_All	1.11	1.4	1.42	1.07	0.82	0.71
CL10150.Contig2_All	8.93	8.04	8.47	7.47	9.38	7.21
CL10150.Contig3_All	3.94	5.4	4.85	4.05	3	3.4
CL10150.Contig4_All	0.48	1.42	1.71	7.65	3.63	7.52
CL10150.Contig5_All	16.62	14.65	15.59	8.59	13.4	9.8
CL10150.Contig6_All	8.94	9.22	10.65	14.39	13.03	13.49
CL10151.Contig4_All	1.42	3.1	1.61	1.01	0.38	0.86
CL10151.Contig5_All	0.07	0	0	0.78	1.41	1.24
CL10151.Contig6_All	2.3	2.31	3.29	0.38	0.27	0.58
CL10153.Contig1_All	8.95	7.69	6.38	12.49	11.75	10.7
CL10154.Contig2_All	0.41	0.59	0.29	2.36	2.56	1.22
CL10155.Contig2_All	0.5	0.78	0.44	2.73	2.63	1.77
CL10156.Contig2_All	1.27	1.37	1.7	0.84	1.1	0.61
CL10157.Contig4_All	0.57	0.82	0.66	3.21	3.36	1.9
CL10158.Contig1_All	26.57	24.35	26.5	82.39	80.46	74.78
CL10158.Contig2_All	43.11	44.97	45.2	40.17	40.51	37.54
CL10158.Contig3_All	21.71	24.13	24.06	22.52	24.54	21.3
CL10159.Contig1_All	0	0	0	0.46	0.41	0.14
CL1016.Contig3_All	4.97	4.62	4.88	3.12	3.18	4.13
CL10160.Contig1_All	3.37	3.12	4.2	7.3	8.02	8.36
CL10160.Contig2_All	0.48	0.73	0.54	1.61	1.41	1.38
CL10161.Contig4_All	1.01	1.43	1.02	2.97	3.82	4.07
CL10161.Contig5_All	0.26	0	0.11	3.76	5.8	5.93
CL10163.Contig2_All	4.52	5.01	6.92	3.39	2.84	2.17
CL10164.Contig3_All	2.45	2.15	3.19	1.94	1.86	1.48
CL10164.Contig4_All	4.36	3.32	6.09	2.43	2.91	1.96
CL10164.Contig5_All	2.58	2.45	3.01	2.15	1.42	1.96
CL10165.Contig2_All	1.12	1.21	1.47	5.48	5.97	5.77
CL10169.Contig2_All	4.86	6.15	4.62	1.07	0.96	0.79
CL1017.Contig3_All	0.61	0.48	0.44	1.13	1.77	2.21
CL1017.Contig6_All	0.99	0.56	0.81	3.91	3.66	4.38
CL10170.Contig1_All	6.39	7.49	7.41	20.42	19.22	20.5
CL10170.Contig2_All	1.17	0.61	0.88	3.97	3.37	3.22
CL10171.Contig2_All	9.63	9.77	10.52	13.46	13.39	13.11
CL10171.Contig5_All	12.27	13.47	14.12	13.15	12.76	12.15
CL10172.Contig3_All	0.49	0.78	1.29	1.78	1.68	2.46
CL10173.Contig1_All	23.8	20.79	23.64	40.38	32.65	33.91
CL10173.Contig2_All	29.71	26.67	20.23	76.48	76	81.29
CL10173.Contig3_All	78.43	68.08	82.51	57.3	54.88	52.19
CL10174.Contig1_All	27.78	31.2	26.29	0	0	0.09
CL10174.Contig2_All	3.67	4.15	2.99	7.79	9.05	8.67
CL10174.Contig3_All	133.97	146.9	139.91	40.01	39.98	39.02
CL10174.Contig4_All	5.07	5.27	6.85	3.18	3.29	2.79
CL10174.Contig5_All	5.78	7.36	8.58	1.72	1.46	2.1
CL10174.Contig6_All	36.12	40.17	34.91	3.95	3.57	4.85
CL10174.Contig7_All	24.77	20.59	22.43	0.35	0.09	0.1
CL10178.Contig2_All	4.73	4.92	5.27	3.76	3.55	3.31
CL1018.Contig10_All	1.79	1.56	1.31	0.77	0.88	0.64
CL1018.Contig1_All	7.55	7.74	7.81	4.14	2.98	3.22
CL1018.Contig4_All	0.18	0.21	0	1.25	1.22	0.71
CL1018.Contig5_All	2.44	2.64	3.31	1.53	1.27	1.17
CL1018.Contig7_All	2.38	2.52	2.69	1.47	1.54	1.26
CL10181.Contig2_All	2.91	3.73	3.96	6.03	5.97	6.99
CL10182.Contig3_All	1.85	2.09	2.24	5.06	6.75	5.82
CL1019.Contig1_All	13.08	17.01	14.36	22.47	21.6	22
CL1019.Contig2_All	1.56	0.77	1.18	0.7	0.32	0.5
CL1019.Contig8_All	3.03	1.58	2.76	1.4	1.85	0.29
CL10190.Contig2_All	7.8	7.43	8.01	11.15	10.29	10.47
CL10192.Contig4_All	1.73	2.04	2.21	1.04	1.03	1.31
CL10193.Contig1_All	4.97	6.04	4.52	0	0	0
CL10193.Contig2_All	23.31	18.99	21.27	42.17	41.59	46.25
CL10193.Contig3_All	20.96	24.04	24.48	19.06	19	16.89
CL10194.Contig1_All	0.35	0.97	0.68	0.18	0.09	0.08
CL10196.Contig2_All	5.41	4.85	6.07	3.16	2.86	3.07
CL10196.Contig4_All	1.4	1.09	1.64	3.25	3.17	3.03
CL10196.Contig5_All	2.16	2.61	3.05	5.82	6.54	6.4
CL10199.Contig2_All	3.1	2.81	4.08	2.32	1.72	1.58
CL102.Contig11_All	8.03	7.56	7.72	82.88	81.64	92.68
CL102.Contig12_All	15.68	14.34	19.4	98.06	97.9	99.75
CL102.Contig13_All	1.35	1.03	0.86	3.86	3.35	2.65
CL102.Contig16_All	9.05	9.03	10.28	0	0.25	0
CL102.Contig1_All	5.2	4.56	4.59	9.23	9.5	11.03
CL102.Contig2_All	1.05	1.35	0.79	8.33	9.16	11.28
CL102.Contig3_All	3.59	4.98	5.65	18.7	22.66	19.14
CL102.Contig4_All	9.83	10.89	10.75	129.14	124.86	134.96
CL102.Contig5_All	0.33	0.1	0.17	11.2	7.97	8.55
CL102.Contig7_All	3.54	2.22	2.93	52.75	50.97	48.88
CL102.Contig8_All	6.38	6.88	6.66	64.38	63.38	68
CL102.Contig9_All	2.54	2.69	2.06	22.54	18.19	16.69
CL1020.Contig13_All	2.68	1.86	7	0	0	0
CL1020.Contig14_All	0.99	1.41	1.4	0.27	0.77	0.83
CL1020.Contig15_All	2.76	4.12	3.61	10.95	10.64	10.83
CL1020.Contig2_All	1.26	0.98	1.88	0	0	0
CL1020.Contig7_All	1.24	1.02	1.27	0.79	0.72	0.82
CL10200.Contig2_All	22.32	21.02	20.92	35.96	34.83	34.74
CL10200.Contig3_All	12.01	11.96	11.86	19.79	20.95	19.06
CL10201.Contig1_All	3.66	5.7	4.33	1.08	1.82	1.41
CL10203.Contig1_All	4.65	5.93	6.71	0.23	0.36	0.12
CL10203.Contig2_All	4.51	3.59	3.35	0.56	0.64	0.16
CL10204.Contig4_All	0.72	0.64	0.59	0.04	0.11	0.17
CL10205.Contig1_All	6.48	7.82	7.64	12.38	10.04	12.53
CL10206.Contig1_All	16.04	17.55	18.04	11.64	12.22	11.88
CL10206.Contig2_All	1.76	1.64	1.26	0.27	0.78	0.97
CL10208.Contig3_All	0.21	0.53	1.75	3.35	5.56	4.2
CL10209.Contig1_All	4.71	3.59	4.06	6.89	7.43	7.31
CL10209.Contig2_All	0.82	1.29	1.13	2.79	4.46	4.83
CL10209.Contig3_All	2.76	2.63	3.46	5.38	5.03	5.82
CL10210.Contig1_All	16.12	15.85	16.36	43.81	41.14	37.32
CL10210.Contig2_All	60.15	56.9	64.71	53.84	53.64	53.63
CL10210.Contig3_All	91.31	93.15	93.18	147.15	149	151.86
CL10212.Contig1_All	1.13	0.91	1.31	3.2	3.18	2.9
CL10212.Contig3_All	5.95	6.07	4.69	13.89	13.04	13.61
CL10213.Contig2_All	0	0.22	0.45	4.27	2.73	2.45
CL10214.Contig3_All	1.07	1.31	1.1	2.8	2.36	2.69
CL10214.Contig5_All	1.36	1.53	0.89	2.33	2.88	2.63
CL10216.Contig10_All	1.53	1.7	1.7	0.27	0.08	0.04
CL10216.Contig11_All	3.39	4.53	4.06	0.46	0.36	0.45
CL10216.Contig12_All	1.6	2.04	1.28	0.06	0.04	0.13
CL10216.Contig14_All	2.6	2.29	2.16	0.59	0.7	0.76
CL10216.Contig15_All	0.81	0.83	0.63	0	0	0
CL10216.Contig16_All	0.43	0.38	0.49	0.05	0	0
CL10216.Contig17_All	1.43	1.53	1.69	0.7	0.3	0.3
CL10216.Contig19_All	6.98	6.96	7.27	1.69	2.68	2.51
CL10216.Contig1_All	1.44	1.77	2.64	0.18	0.17	0
CL10216.Contig20_All	0.72	1.09	0.64	0.31	0.51	0.46
CL10216.Contig21_All	0.95	0.41	0.44	0.17	0.12	0.12
CL10216.Contig23_All	0.17	0	0.38	0	0	0.05
CL10216.Contig4_All	9.27	10.32	9.95	1.03	1.2	1.19
CL10216.Contig6_All	0.68	0.72	0.63	0.08	0.07	0.02
CL10216.Contig7_All	2.68	2.83	2.64	1.26	1.43	1.02
CL10216.Contig8_All	2.97	2.41	3.02	0.95	0.68	1.09
CL1022.Contig2_All	1.81	2.75	1.96	2.82	6.42	5.59
CL1022.Contig3_All	44.28	39.33	44.85	76.8	76.99	86.62
CL1022.Contig4_All	14.1	13.88	15.45	11.01	11.51	11.63
CL1022.Contig5_All	56.93	55.62	55.73	25.58	27.19	27.97
CL1022.Contig6_All	41.25	46.21	48.43	39.14	41.27	39.53
CL10220.Contig6_All	0	0	0	0.53	0.3	0
CL10220.Contig9_All	0.94	0.59	0.59	3.54	2.18	1.72
CL10221.Contig1_All	0.44	0.51	0.32	0.9	1.02	1.24
CL10221.Contig2_All	2.97	2.91	2.9	11.18	10.35	11.63
CL10221.Contig4_All	2.69	1.75	2.5	6.06	7.56	6.79
CL10222.Contig2_All	0.28	0	0.27	0.08	0	0.04
CL10222.Contig4_All	1.75	2.24	2.7	4.86	4	4.35
CL10222.Contig5_All	1.07	0.96	1	0.38	0.68	0.56
CL10223.Contig1_All	2.12	2.44	2.6	1.16	1.98	2
CL10223.Contig2_All	8.37	9.1	8.11	2.78	2.98	3.11
CL10223.Contig3_All	1.74	1.97	1.62	3.38	2.79	2.79
CL10223.Contig4_All	1.73	2.24	1.28	1.1	1.58	1.1
CL10223.Contig6_All	1.6	1.52	1.35	3.87	3.36	3.12
CL10223.Contig7_All	1.18	1.06	1.79	0.56	0.43	0.65
CL10225.Contig1_All	0	0	0	1.5	0.41	1.07
CL10225.Contig2_All	16.81	19.38	19.83	15.9	17.02	15.01
CL10226.Contig1_All	0.73	0.64	0.96	0	0.22	0.21
CL10228.Contig1_All	5.85	7.28	4.73	0	0	0
CL10228.Contig3_All	3.08	2.98	2.46	0	0	0
CL10229.Contig2_All	3.86	3.8	4.37	1.8	2.95	2.85
CL10229.Contig4_All	1.61	1.17	1.39	2.5	3.01	3.1
CL10229.Contig5_All	3.53	3.26	4.18	6.03	5.11	5.04
CL10229.Contig6_All	6.06	6.25	6.47	4.1	3.72	3.42
CL1023.Contig2_All	3.38	1.43	2.05	0	0	0.25
CL10230.Contig2_All	4.48	4.78	5.39	2.12	1.82	1.36
CL10231.Contig4_All	0.72	0.3	0.32	1.51	1.89	2.5
CL10233.Contig1_All	9.43	8.47	10.2	35.44	34.77	31.17
CL1024.Contig4_All	0.5	0.37	0.51	3.38	2.81	2.77
CL1024.Contig7_All	0.85	0.6	0.55	1.3	2.52	2.8
CL10241.Contig3_All	2.33	2.23	2.21	0.3	0.15	0.33
CL10241.Contig4_All	8.12	9	9.21	14.83	14.49	13.59
CL10247.Contig2_All	33.31	32.27	34.29	27.01	30.23	24.83
CL10247.Contig3_All	95.11	86.65	96.08	136.51	140.24	140.21
CL10247.Contig4_All	76.8	69.62	77.29	98.11	104.57	90.29
CL10248.Contig1_All	2.26	1.9	2.7	3.95	4.52	4.01
CL10249.Contig2_All	4.63	4.53	4.05	0.91	1.12	0.56
CL10249.Contig4_All	1.57	1.03	1.23	2.81	2.76	2.54
CL1025.Contig1_All	9.51	10.89	10.74	7.05	7.6	6.68
CL1025.Contig2_All	10.86	9.74	10.54	0.61	0.78	0.77
CL1025.Contig3_All	2.7	2.62	3.03	0.2	0.12	0.32
CL10250.Contig1_All	2.42	2.3	3.08	0.26	0	0.51
CL10250.Contig4_All	1.96	1.85	1.63	1.16	1.04	0.71
CL10251.Contig4_All	3.72	3.42	4.1	2.94	3.2	2.4
CL10254.Contig1_All	0.79	0.62	0.79	0.3	0.3	0.49
CL10255.Contig2_All	0	0	0	4.11	3.28	2.16
CL10256.Contig4_All	26.63	27.41	28.33	46.93	48.42	48.47
CL10260.Contig3_All	1.32	1.05	1.6	4.82	3.1	4.45
CL10260.Contig4_All	2.31	2.26	2.47	6.35	4.84	6.29
CL10261.Contig1_All	0.59	0.6	0.3	0.14	0.13	0.1
CL10261.Contig2_All	0.56	0.27	0.23	0.13	0.06	0.09
CL10264.Contig2_All	0	0.15	0.13	0.71	0.32	0.68
CL10264.Contig3_All	2.66	3.01	2.88	2.14	1.99	1.8
CL10265.Contig1_All	1.36	1.31	0.87	3.49	3.18	3.83
CL10266.Contig1_All	0.31	0.38	0.48	4.83	5.2	4.3
CL10268.Contig1_All	0.56	0.82	0.55	1.24	2.28	2.02
CL10268.Contig2_All	2.29	2.64	2.27	5.74	5.26	6.59
CL10271.Contig1_All	31.41	32.57	33.89	43.07	49.82	43.72
CL10271.Contig2_All	15.93	16.07	15.91	21.86	20.8	20.14
CL10271.Contig3_All	1.07	0.81	1.21	8.67	8.17	7.01
CL10271.Contig5_All	39.61	41.14	38.96	101.26	104.46	97.89
CL10273.Contig2_All	8.01	6.81	7.36	11.36	12.88	11.17
CL10273.Contig3_All	6.85	9.23	8.93	15.91	15.52	14.99
CL10273.Contig5_All	22.56	27.8	27.13	1.94	5.04	3.64
CL10274.Contig1_All	3.22	3.19	3.2	2.35	2.54	2.58
CL10275.Contig2_All	12.54	12.32	14.18	10.22	7.21	9.1
CL10275.Contig3_All	0.46	1.51	0.92	2.34	2.93	1.99
CL10275.Contig4_All	6.2	6.21	4.02	9.38	9.03	11.89
CL10277.Contig1_All	3.43	3.79	4.2	8.26	7.41	7.93
CL10277.Contig2_All	10.62	10.42	10.56	10.19	9.32	9.4
CL10277.Contig3_All	6.63	6.44	7.22	9.49	9.93	8.21
CL10277.Contig5_All	8.52	9.68	9.33	3.33	3.49	3.15
CL10279.Contig1_All	5.88	7.36	7.01	13.99	15.82	15.28
CL1028.Contig1_All	3.03	3.04	2.63	1.91	1.93	1.44
CL1028.Contig2_All	2.03	1.79	2.1	1.37	1.39	1.67
CL1028.Contig3_All	0.9	1.07	0.6	0.29	0.26	0.51
CL10280.Contig1_All	4.36	4.28	4.24	2.03	2.89	2.23
CL10280.Contig4_All	8.78	8.48	11.07	7.11	7.88	7.76
CL10281.Contig9_All	0.38	0.78	0	0.71	1.55	2.26
CL10285.Contig1_All	1.55	0.81	1.22	0	0.21	0.2
CL10288.Contig2_All	0.44	0.33	0.68	0	0	0.07
CL10289.Contig1_All	2.71	2.22	2.08	6.44	5.98	6.26
CL10289.Contig3_All	5.22	5.84	5.38	1.64	1.39	0.52
CL1029.Contig2_All	0.08	0	0.08	1.61	2.04	1.7
CL10291.Contig2_All	14.02	13.14	14.82	13.82	11.12	12.91
CL10292.Contig1_All	4.97	4.16	4.28	1.36	1.91	1.87
CL10292.Contig2_All	2.43	4.89	3.44	13.26	12.13	12.03
CL10292.Contig3_All	0.12	0.28	0.21	1.05	0.94	0.42
CL10292.Contig5_All	3.51	3.87	3.97	1.77	1.53	1.93
CL10293.Contig1_All	0.3	0	0	1.27	1.8	3
CL10295.Contig2_All	6.87	7.38	8.02	6.01	5.79	6.1
CL10295.Contig4_All	4.45	5.5	5.03	1.09	0.88	0.98
CL10295.Contig5_All	5.91	7.54	6.88	11.56	11.92	10.67
CL10297.Contig2_All	14.47	13.31	14.5	25.39	27.17	23.92
CL10298.Contig3_All	9.98	9.04	9.61	13.36	13.66	13.56
CL103.Contig2_All	4.11	4.54	4.02	1.39	1.43	1.61
CL103.Contig6_All	1.18	0.35	0.53	0	0	0
CL1030.Contig2_All	1.2	1.19	1.45	3.48	4.05	4.05
CL1030.Contig6_All	0.27	0.29	0.34	1.77	0.76	1.24
CL1030.Contig8_All	2.28	2.32	2.92	1.82	1.68	1.39
CL10300.Contig1_All	0.37	0.5	0.31	1.61	2.88	2.03
CL10300.Contig3_All	1.41	0.82	1.8	3.88	3.85	4.54
CL10300.Contig4_All	4.6	5.14	4.75	2.22	2.51	2.81
CL10301.Contig1_All	12.68	15.25	14.75	9.46	14.45	11.98
CL10302.Contig3_All	3.51	3.29	2.66	2.16	1.13	2.25
CL10305.Contig6_All	1.16	1.59	1.56	0.83	0.69	0.69
CL10308.Contig4_All	0.93	0.99	1.56	2.78	2.33	3.48
CL10309.Contig2_All	0.81	1.01	0.36	4.21	4.26	3.84
CL10309.Contig3_All	7.95	8.66	8.83	3.46	4.95	5.7
CL10309.Contig4_All	16.26	16.72	18.51	22.81	27.96	33.47
CL1031.Contig10_All	116.82	121.44	136.49	178.82	186.1	185.77
CL1031.Contig11_All	41.01	40.73	46.13	70.85	71.86	69.06
CL1031.Contig12_All	31.63	29.79	30.24	7.62	6.67	7.72
CL1031.Contig13_All	280.89	290.17	303.69	398.35	395.64	397.58
CL1031.Contig15_All	4.36	5.05	4.59	6.93	6.29	6.91
CL1031.Contig16_All	170.66	171.8	179.21	55.52	59.4	53.3
CL1031.Contig18_All	79.52	78.78	74.27	42.51	45.81	47.98
CL1031.Contig19_All	93.66	81.92	92.28	43.21	45.05	46.19
CL1031.Contig20_All	137.44	151.9	162.25	245.12	253.1	246.98
CL1031.Contig21_All	21.09	20.99	18.97	40.11	35.39	35.54
CL1031.Contig22_All	203.64	223.62	220.99	212.24	219.09	227.53
CL1031.Contig23_All	2.33	2.05	1.96	3.89	3.88	4.1
CL1031.Contig24_All	347.14	344.39	361.49	604.18	607.28	618.27
CL1031.Contig2_All	0.53	0.62	0.85	0.17	0.4	0.22
CL1031.Contig4_All	3.28	4.51	6.12	8.57	9.45	8.12
CL1031.Contig6_All	44.11	45.91	45.91	33.56	33.25	33.09
CL1031.Contig7_All	118.67	117.43	121.05	157.77	153.07	150.54
CL1031.Contig8_All	12.46	11.31	14.24	3.6	3.3	3.47
CL10314.Contig1_All	1.2	0.77	1.05	2.66	2	2.55
CL10314.Contig2_All	0.94	1.33	2.8	4.12	4.87	4.62
CL10314.Contig3_All	10.12	10.42	8.89	14.58	14.25	15.01
CL10314.Contig4_All	14.44	16.57	15.81	67.6	65.15	62.37
CL10314.Contig5_All	38.66	42.38	41.57	11.98	14.38	10.59
CL10315.Contig2_All	0.79	1.37	0.96	3.54	2.36	3.33
CL10316.Contig2_All	21.81	20.98	21.78	34.04	33.71	30.31
CL10317.Contig1_All	18.53	16.84	16.64	27.07	26.39	29.39
CL10317.Contig2_All	8.65	9.62	9.44	15.43	17.9	18.39
CL10318.Contig2_All	0	0.1	0.39	1.9	1.88	2.02
CL10318.Contig3_All	0.16	0.1	0.06	0.87	0.47	0.35
CL10318.Contig5_All	1.95	1.54	1.81	4.13	3.52	3.32
CL1032.Contig2_All	3.07	3.21	3.35	0	0	0.09
CL1032.Contig3_All	21.21	19.36	20.06	17.98	19.65	18.25
CL10320.Contig1_All	12.4	11.24	12.68	19.64	21.03	18.89
CL10320.Contig3_All	13.53	12.33	16.12	12.73	13	11.7
CL10321.Contig2_All	1.53	0.49	0.8	1.77	2.05	2.38
CL10321.Contig3_All	1.24	1.51	1.73	4.31	5.51	4.94
CL10322.Contig2_All	3.73	3.71	3.91	2.84	3.28	2.67
CL10322.Contig3_All	2.82	2.93	3.38	4.67	4.69	4.42
CL10324.Contig1_All	13.44	13.88	13.72	25.01	27.37	24.14
CL10325.Contig1_All	1.08	0.61	1.5	0	0.15	0
CL10325.Contig2_All	0.51	0.25	0.5	0	0.09	0.13
CL10325.Contig4_All	1.18	1.9	1.41	0.04	0	0.04
CL10326.Contig2_All	1.43	0.96	0.44	3.32	2.59	4.01
CL10327.Contig2_All	0	0	0	1.6	2.63	1.19
CL10328.Contig2_All	2.55	2.92	2.89	6.65	5.45	5.31
CL10329.Contig3_All	1.33	0.96	0.96	4.2	4.54	3.66
CL10329.Contig4_All	0.89	1.27	1.27	0.53	0.35	0.4
CL10329.Contig5_All	1.05	0.93	1.4	0.38	0.31	0.34
CL1033.Contig2_All	7.92	9.16	7.58	4.4	3.58	3.85
CL1033.Contig3_All	3.04	3.24	1.56	0.72	1.18	0.91
CL1033.Contig4_All	19.53	19.2	19.33	12.89	14.71	13.81
CL1033.Contig5_All	11.83	12.2	12.96	7.21	8.8	8.52
CL1033.Contig6_All	8.03	8	8.35	6.42	5.06	6.55
CL10330.Contig5_All	12.81	12.78	12.55	11.91	12.33	11.77
CL10331.Contig1_All	15.78	17.65	15.72	17.71	14.94	12.51
CL10331.Contig3_All	23.74	25.64	24.34	31.62	32.11	33.55
CL10332.Contig2_All	6.13	8.13	6.34	0.71	0.5	0.37
CL10332.Contig3_All	0.32	0.33	0.16	2.16	3.34	4.13
CL10333.Contig7_All	0.71	1.24	1.16	0.62	0.54	0.33
CL10335.Contig1_All	0	1.02	0.65	0	0	0
CL10335.Contig4_All	9.21	9.56	8.99	7.9	7	7.55
CL10337.Contig1_All	0	0	0	4.3	2.78	4.55
CL10337.Contig2_All	0.29	0.15	0.61	1.99	1.86	2.28
CL10337.Contig4_All	0	0	0	0.2	0.37	0.17
CL10337.Contig7_All	2.48	1.34	2.59	8.54	7.8	8.82
CL10338.Contig1_All	6.6	7.56	8.2	4.9	4.45	4.71
CL10338.Contig2_All	2.38	2.3	2.9	5.14	6.09	6.07
CL10339.Contig1_All	2.41	1.86	2.31	1.61	1.55	1.6
CL1034.Contig10_All	2.63	2.76	2.28	1.63	2.07	1.82
CL1034.Contig12_All	0	0	0	1.34	1.55	0.89
CL1034.Contig13_All	0	0	0	1.3	1.79	2.09
CL1034.Contig14_All	12.31	13.04	10.79	16.8	17.47	16.11
CL1034.Contig16_All	2.6	2.11	3.41	1.15	2.39	1.9
CL1034.Contig17_All	1.14	0.77	0.81	0.19	0.33	0.35
CL1034.Contig19_All	1.39	0.81	0.68	0	0	0
CL1034.Contig20_All	0.31	0.2	0.25	0.1	0.05	0.06
CL1034.Contig22_All	5.51	5.67	5.89	10.23	9.45	9.2
CL1034.Contig2_All	1.07	1.49	1.63	0	0	0
CL1034.Contig3_All	1.34	1.11	1.27	2.15	2.51	2.62
CL1034.Contig5_All	1.88	2.85	2.29	4.35	4.71	5.28
CL1034.Contig6_All	3.38	3.52	3.87	1.02	0.97	1.01
CL1034.Contig8_All	2.8	2.2	2.07	3.44	3.56	4.07
CL1034.Contig9_All	0.12	0.19	0.18	0.52	0.63	0.31
CL10344.Contig2_All	2.53	2	1.9	0.5	0.41	0.3
CL10344.Contig3_All	0.1	0.11	0.23	1.37	0.62	1.06
CL10345.Contig1_All	6.04	6.4	6.4	3.94	3.55	3.63
CL10345.Contig2_All	2.74	3.67	7.07	0.74	0.75	0.73
CL10346.Contig1_All	0.68	0.68	0.5	1.72	2.69	2.26
CL10346.Contig2_All	2.44	2.01	2.57	1.03	1.28	1.09
CL10346.Contig3_All	0.16	0.65	0.75	2.3	2.66	2.23
CL10346.Contig4_All	2.74	0.33	1.97	0	0	0
CL10346.Contig5_All	4	3.51	3.94	1	1.3	0.91
CL10346.Contig6_All	1.59	1.27	1.44	0.25	0.36	0.19
CL10347.Contig3_All	5.54	6.84	5.84	9.57	10.31	9.1
CL10347.Contig5_All	2.34	2.31	2.58	4.07	5.13	4.51
CL10349.Contig2_All	1.07	1.11	1.32	3.18	3.24	2.04
CL1035.Contig1_All	2.35	2.52	4.19	5.91	7.44	7.35
CL1035.Contig2_All	1.58	2.64	2.4	0	1.2	0.41
CL1035.Contig5_All	0.49	0.39	0.43	3.52	2.88	2.67
CL1035.Contig6_All	0.75	0.65	1.06	2.55	2.45	3.18
CL10351.Contig2_All	4.51	4.24	4.77	2.01	1.73	1.98
CL10353.Contig1_All	2.29	2.63	2.28	0.67	1.21	1.11
CL10353.Contig4_All	2.41	2.08	2.64	3.75	3.5	3.36
CL10354.Contig1_All	0.99	0.83	1.2	0	0.17	0.17
CL10354.Contig2_All	7.3	8.66	5.02	2.77	2.11	2.24
CL10355.Contig4_All	2.42	2.37	2.29	0	0	0
CL10357.Contig1_All	0	0	0	1.57	1.76	1.1
CL10357.Contig2_All	0.24	0	0	2.68	2.3	1.47
CL10359.Contig2_All	6.28	6.6	5.99	3	2.63	2.86
CL10360.Contig1_All	22.66	18.08	21.03	0	0.59	0.57
CL10360.Contig2_All	0.67	0.47	0	11.59	13.67	16.17
CL10360.Contig4_All	0	0	0	2.32	1.17	1.15
CL10360.Contig6_All	25.94	27.1	23.29	6.32	3.84	5.37
CL10360.Contig8_All	13.27	12.19	14.05	20.07	21.83	24.29
CL10361.Contig10_All	0.16	0.22	0.16	0	0.01	0
CL10361.Contig2_All	1.35	1.59	0.86	0.64	0.13	0.13
CL10361.Contig7_All	1.15	1.02	1.65	0.71	0.31	0.4
CL10362.Contig2_All	3.84	3.43	5.14	0	0	0
CL10364.Contig1_All	0.66	1.07	1.15	2.6	2.61	3.2
CL10364.Contig2_All	3.09	3.75	2.91	9.85	9.99	9.55
CL10364.Contig3_All	4.08	3.98	3.37	6.27	6.7	6.55
CL10365.Contig4_All	6.36	5.28	5.85	10.91	12.59	13.05
CL10366.Contig2_All	2.79	1.8	2.28	7.64	9.51	6.94
CL10366.Contig3_All	8.95	8.59	8.99	13.97	13.33	13.86
CL10367.Contig1_All	3.44	3.9	3.75	6.71	7.23	5.85
CL10367.Contig2_All	5.58	6.09	5.58	9.74	9.29	9.01
CL10367.Contig3_All	0.9	1.12	0.97	3.28	4.14	3.99
CL10369.Contig1_All	6.81	5.95	5.69	14.45	14.69	14.46
CL10369.Contig2_All	10.71	10.73	10.6	6.28	5.94	5.9
CL1037.Contig1_All	0.67	0.24	0.23	2.07	1.47	1.85
CL1037.Contig3_All	0.55	2.14	1.36	0	0.24	0
CL1037.Contig7_All	11.07	7.9	7.8	5	5.94	6.52
CL1037.Contig8_All	2.08	3.57	4.21	8.1	9.4	9.61
CL10370.Contig1_All	0.33	0.43	0.09	0	0	0
CL10370.Contig3_All	2.22	3.01	2.28	6.03	5.66	5.9
CL10370.Contig4_All	1.26	0.8	1.62	0.57	0.8	0.42
CL10371.Contig2_All	1.51	1.7	0.87	4.51	3.15	3.55
CL10371.Contig5_All	7.1	10	9.86	7.35	7.18	6.71
CL10373.Contig2_All	0.16	0.09	0.29	2.11	2.45	2.76
CL10374.Contig3_All	2.99	3.06	2.95	1.01	1.1	1.13
CL10376.Contig3_All	4.18	4.41	4.58	11.04	9.53	10.72
CL10378.Contig1_All	2.08	3.4	2.57	10.24	11.62	9.74
CL10379.Contig1_All	12.88	12.03	12.12	4.83	4.77	4.64
CL10379.Contig3_All	4.95	4.67	4.56	2.89	2.78	2.51
CL10379.Contig5_All	8.86	8.4	7.95	6.8	5.4	5
CL10379.Contig6_All	1.63	1.69	1.93	1.2	0.85	1.22
CL1038.Contig3_All	1.19	1.25	1.34	2.24	1.93	2.04
CL10381.Contig4_All	4.33	4.11	4.43	6.76	5.64	7.08
CL10381.Contig6_All	2.15	1.69	2.25	0.56	0.19	0.37
CL10382.Contig1_All	4.93	6.68	6.32	3.05	2.71	2.87
CL10382.Contig3_All	2.02	1.49	1.99	5.34	6.45	5.74
CL10384.Contig1_All	0.33	0	0.11	1.32	1.29	1.41
CL10385.Contig1_All	3.7	3.98	3.33	1.61	1.49	1.21
CL10386.Contig2_All	67.79	67.75	59.1	61.46	70.42	63.42
CL1039.Contig1_All	0	0.45	0.21	0.68	0.78	0.77
CL1039.Contig2_All	73.9	74.97	73.08	57.18	57.25	55.43
CL1039.Contig3_All	58.14	56.01	53.21	59.19	56.3	58.1
CL1039.Contig4_All	54.1	51.03	52.59	51.62	54.02	50.23
CL10390.Contig1_All	1.65	1.41	2	15.6	14.95	15.25
CL10390.Contig2_All	3.38	3	2.82	1.27	0.87	1.66
CL10390.Contig3_All	6.89	6.6	6.44	14.73	14.59	14.92
CL10391.Contig2_All	4.79	3.96	3.66	6.62	7.79	6.9
CL10392.Contig1_All	0.11	0	0.11	1.55	1.46	1
CL10395.Contig3_All	4.46	4.59	3.25	2.05	1.77	2.87
CL10395.Contig4_All	2.24	2	2.91	1.98	1.68	1.57
CL10397.Contig2_All	6.21	6.7	6.32	8.74	8.82	8.71
CL10398.Contig3_All	2.96	2.1	3.41	8.39	8.67	8.76
CL10398.Contig5_All	6.7	7.35	6.38	18.85	23.98	19.6
CL104.Contig10_All	0.08	0.04	0	1.41	1.26	1.34
CL104.Contig16_All	7.27	7.28	7.32	10.85	12.04	10.81
CL104.Contig17_All	6.55	7.43	6.95	2.67	1.8	2.61
CL104.Contig18_All	2.3	1.42	1.24	1.16	0.83	0.87
CL104.Contig2_All	1.38	1.89	1.48	1.15	0.88	0.21
CL104.Contig4_All	0.88	1.03	0.67	1.64	2	1.59
CL104.Contig5_All	1.05	1.14	1.71	0.36	0.53	0.37
CL104.Contig6_All	12.53	11.84	13.06	10.26	9.12	8.13
CL104.Contig7_All	0	0	0	1.27	0.78	0.39
CL1040.Contig10_All	35.84	36.79	34.56	26.33	26.92	24.76
CL1040.Contig11_All	39.46	41.8	42.9	28.26	27.81	28.24
CL1040.Contig12_All	49.22	51.98	54.37	51.48	49.55	48.96
CL1040.Contig1_All	0.33	0	0	20.69	21.33	21.06
CL1040.Contig4_All	9.69	10.17	10.5	3.2	3.46	4.08
CL1040.Contig5_All	0.77	1.08	1.02	4.15	4.11	3.16
CL1040.Contig6_All	4.35	4.34	4.35	12.92	14.09	12.31
CL1040.Contig7_All	2.48	2.29	2.43	5.48	5.83	4.45
CL1040.Contig9_All	16.2	16.45	14.91	13.79	12.75	11.7
CL10400.Contig1_All	1.9	1.56	0.43	0.3	0.29	0
CL10400.Contig5_All	1.1	0.36	1.84	0	0	0
CL10401.Contig3_All	0.49	0.39	0.54	2.8	3.27	1.79
CL10401.Contig5_All	3.38	5.33	4.29	0.28	0.47	1.11
CL10402.Contig1_All	0	0	0	0.52	0.53	0.29
CL10402.Contig2_All	4.2	5.11	4.55	3.32	3.36	2.62
CL10402.Contig6_All	4.17	3.59	4.23	15.1	14.66	13.35
CL10403.Contig3_All	0	0	0	1.16	2.34	4.5
CL10404.Contig1_All	6.12	5.85	6.01	4.98	4.72	4.83
CL10405.Contig1_All	0	0	0	0.41	0.48	0.41
CL10405.Contig2_All	1.45	1.52	0.65	0	0	0
CL10406.Contig1_All	4.06	3.99	3.75	0.06	0	0
CL10406.Contig3_All	2.29	3.04	3.77	0.35	0.46	0.09
CL10406.Contig4_All	2.4	1.43	2.44	0.62	1.4	0.44
CL10406.Contig5_All	2.25	2.24	1.64	3.85	4.89	5.43
CL10408.Contig4_All	2.7	2.54	3.11	1.95	1.52	1.93
CL10409.Contig3_All	1.82	1.55	1.62	0	1.1	0.41
CL1041.Contig1_All	0.41	0.42	0.47	1.55	2.2	1.74
CL1041.Contig4_All	4.06	4.57	4.59	0.28	0.37	0.28
CL10410.Contig1_All	0.46	0.31	0.61	0.13	0.16	0.12
CL10411.Contig2_All	2.97	4.28	4.5	2.44	2.25	1.38
CL10411.Contig3_All	2.54	2.05	2.93	3.93	4.01	4.87
CL10411.Contig5_All	0.79	1.49	1.51	2.34	2.73	2.73
CL10413.Contig2_All	0.33	0.81	0.71	0	0.06	0.06
CL10413.Contig3_All	1.23	0.97	1.49	0.12	0	0.07
CL10415.Contig2_All	1.9	2.6	1.12	5.03	8	5.61
CL10415.Contig3_All	3.16	3.49	3.38	0.79	1.54	1.92
CL10416.Contig1_All	6.54	6.63	5.62	10.83	9.52	9.56
CL10417.Contig2_All	1.62	1.29	1.88	0.47	1.02	0.89
CL10419.Contig1_All	1.31	0.58	1.09	0.34	0.35	0.28
CL10419.Contig2_All	0.16	0.17	0.17	1.63	1.24	2.39
CL1042.Contig5_All	0.09	0	0.18	1.18	1.39	1.33
CL10420.Contig1_All	0.68	1.41	0.7	0	0	0
CL10420.Contig2_All	1.44	2.25	1.87	3.79	2.98	3.28
CL10420.Contig4_All	1.34	2.2	2.05	3.8	3.69	4.2
CL10423.Contig2_All	11.01	8.88	10.4	18.37	18.46	16.75
CL10424.Contig1_All	1.37	1.07	1.25	0	0	0
CL10424.Contig2_All	1.03	2.25	1.56	0	0	0
CL10425.Contig1_All	14.39	14.61	14.99	13.36	14.07	13.49
CL10426.Contig2_All	0	0	0	2.56	3.89	3.51
CL10427.Contig1_All	2.35	1.25	1.98	4.64	3.42	3.94
CL10427.Contig3_All	2.71	3.29	2.88	4.28	4.12	4.48
CL10427.Contig4_All	2.1	1.92	2.18	1.7	1.41	1.85
CL10427.Contig6_All	1.53	0.89	1.39	3.07	2.6	3.44
CL10427.Contig7_All	0.49	0.57	0.28	1.2	1.11	0.88
CL10427.Contig8_All	3.28	4.31	3.71	1.42	2.25	1.55
CL10430.Contig1_All	0.96	2.32	0.96	0	0	0
CL10431.Contig1_All	6.98	9.02	7.28	0	0.37	0.68
CL10431.Contig3_All	9.16	8.66	9.04	0	0	0
CL10431.Contig5_All	33.12	33.75	29.22	9.17	7.93	6.52
CL10432.Contig2_All	9.21	9.51	9.32	12.79	13.82	12.71
CL10435.Contig1_All	0.23	0.85	1.25	0	0.1	0
CL10435.Contig2_All	2.33	1.43	3.46	1.05	0.85	0
CL10436.Contig1_All	1.21	0.82	1.37	0.48	0.35	0.78
CL10436.Contig4_All	6.05	6.49	5.11	8.91	8.95	10.01
CL10437.Contig1_All	107.87	100.14	101.3	74.81	70.68	82.98
CL10437.Contig2_All	2	2.32	2.06	0.99	0.83	1.2
CL10438.Contig1_All	0	0	0	5.03	2.87	5.74
CL10438.Contig2_All	0	0	0	12.53	10.46	7.32
CL10438.Contig3_All	0	0	0	1.14	1.6	3.14
CL10438.Contig4_All	0	0	0	1.89	1.17	3.11
CL10438.Contig5_All	0	0	0	4.83	1.45	2.46
CL1044.Contig3_All	1.72	1.97	1.58	0	0	0
CL1044.Contig4_All	2.48	2.71	1.9	1.28	0.97	1.33
CL1044.Contig5_All	1.25	0.9	0.83	0.55	0.15	0.33
CL1044.Contig6_All	1.2	1.19	1.09	0.81	0.47	0.37
CL1044.Contig8_All	4.48	4.07	3.32	1.49	1.34	0.98
CL10440.Contig1_All	4.01	4.86	5.57	11.75	10.93	12.19
CL10440.Contig4_All	2.59	2.98	3.28	5.65	6.14	7.13
CL10442.Contig2_All	0.2	0.35	0.16	5.25	5.29	5.49
CL10443.Contig2_All	0.51	0.87	1.12	0.09	0.09	0.26
CL10444.Contig1_All	2.03	1.89	1.69	3.06	2.86	3.27
CL10444.Contig4_All	0.33	0.55	0.43	0	0.05	0.05
CL10444.Contig6_All	0	0	0.13	0.27	0.36	0.35
CL10444.Contig7_All	6.65	6.64	6.21	6.23	5.65	6.2
CL10445.Contig1_All	0.4	0.24	0.39	1.02	1.21	1.47
CL10445.Contig2_All	1.16	0.95	1.65	3.84	4.16	2.48
CL10446.Contig1_All	1.87	1.92	1.6	7.91	6.93	5.54
CL10446.Contig3_All	1.63	2.04	0.6	0	0.73	0.51
CL10447.Contig2_All	24.45	25.37	27.1	22.84	23.18	23.38
CL10447.Contig3_All	0.83	0.52	0.27	0	0	0
CL10448.Contig1_All	0.86	1.6	0.87	3.17	3.13	3.06
CL10448.Contig2_All	0.97	0.93	1.15	2.12	1.86	3.03
CL10448.Contig3_All	26.33	24.27	23.91	17.6	19.38	18.17
CL1045.Contig10_All	1.97	2.88	2.53	1.47	1.72	1.53
CL1045.Contig3_All	4.69	4.91	5.05	1.35	2.13	2.18
CL1045.Contig5_All	0.63	0.46	0.56	1.86	2.1	1.07
CL1045.Contig8_All	5.32	3.62	4.77	0.78	0.55	0.33
CL10450.Contig1_All	1.25	2.08	1.75	0.45	0.41	0.59
CL10450.Contig2_All	4.22	4.3	3.77	1.03	1.63	1.35
CL10450.Contig4_All	5.64	5.88	5.93	8.9	10.31	10.44
CL10451.Contig2_All	115.06	123.5	118.33	154.14	159.44	155.16
CL10452.Contig1_All	4.88	3.73	3.89	0.81	1.02	0.58
CL10454.Contig1_All	0.72	0.56	0.57	2.28	1.96	1.22
CL10454.Contig2_All	14.12	13.66	14	12.94	12.08	12.21
CL10454.Contig4_All	1.67	1.79	1.77	6.33	7	6.35
CL10454.Contig6_All	2.36	2.81	3.77	5.45	5.86	5.64
CL10454.Contig7_All	21.44	20.91	22.81	22.03	20.41	20.61
CL10455.Contig2_All	2.39	2.92	2.44	1.37	0.8	1.2
CL10457.Contig2_All	5.53	4.54	5.67	13.63	14.43	14.37
CL10457.Contig3_All	11.78	11.55	13.98	8.28	6.81	6.11
CL10458.Contig2_All	0.19	0	0	2.96	1.7	1.27
CL10459.Contig3_All	1.32	1.35	0.81	2.93	2.73	3.1
CL1046.Contig1_All	107.4	105.61	98.46	140.6	134.69	146.94
CL1046.Contig3_All	14.57	17.28	21.63	9.38	8.28	10.65
CL1046.Contig4_All	5.73	4.53	5.22	9.84	11.85	10.79
CL10460.Contig3_All	1.98	2.52	1.91	0.93	0.78	0.7
CL10463.Contig1_All	3.18	4.06	3.27	0.5	0.93	0.78
CL10464.Contig3_All	0.77	1.97	1.83	4.23	4.39	4.15
CL10464.Contig4_All	18.06	20.28	18.57	17.38	18.84	18.76
CL10465.Contig1_All	19.04	19.05	23.39	8.19	11.35	7.94
CL10466.Contig2_All	1.03	1.27	1.59	3.68	3.29	3.09
CL10467.Contig2_All	0.91	0.71	0.51	2.29	2.04	2.65
CL10467.Contig3_All	6.52	7.53	7.42	5.98	6.53	5.56
CL10467.Contig4_All	0.32	0.23	0.15	0.6	0.68	0.79
CL10469.Contig3_All	1.52	1.45	2.04	0.98	0.64	0.97
CL10469.Contig5_All	19.82	21.98	18.99	14.65	14.45	15.11
CL1047.Contig1_All	1.31	0.33	0.99	4.8	3.19	3.57
CL1047.Contig2_All	37.9	40.9	39.41	70.79	71.39	71.06
CL1047.Contig3_All	5.46	5.63	6.22	31.63	32.73	32.78
CL1047.Contig4_All	4.18	3.81	3.71	12.15	12.58	13.09
CL1047.Contig5_All	4.45	4.88	4.98	25.11	27.29	24.59
CL1047.Contig7_All	6.01	7.7	6.73	28.43	27.28	28.85
CL1047.Contig9_All	3.05	2.7	3.16	13.19	14.58	14.86
CL10470.Contig5_All	0.55	0.71	0.11	0.07	0.08	0.21
CL10470.Contig7_All	0.57	0.99	1.47	0.79	0.51	0.3
CL10470.Contig8_All	1.49	0.88	1.52	0.8	0.43	0.49
CL10473.Contig1_All	8.63	8.81	6.68	12.5	12.12	11.48
CL10473.Contig2_All	1.76	1.65	2.48	0.69	1.14	1.1
CL10473.Contig3_All	2.19	2.52	2.71	7.13	6.47	5.75
CL10474.Contig1_All	0.38	0.49	0.8	8.51	10.01	9.48
CL10474.Contig5_All	4.97	6.26	4.68	3.48	3.54	3.86
CL10475.Contig2_All	9.16	8.95	9.07	6.23	6.55	7.04
CL10476.Contig2_All	43.23	49.64	47.7	32.83	38.33	35.3
CL10476.Contig3_All	10.29	8.96	8.88	41.39	29.32	33.88
CL10477.Contig3_All	0.52	0.82	0.73	1.71	2.06	2.08
CL10479.Contig2_All	1.41	1.31	1.93	0.7	0.98	1.02
CL10480.Contig2_All	6.24	5.81	6.83	3.02	4.06	4.16
CL10483.Contig1_All	0.05	0.05	0.39	0.51	0.55	0.78
CL10484.Contig1_All	2.47	2.16	2.43	4.53	4.62	4.64
CL10484.Contig2_All	2.51	1.39	1.64	3.85	4.01	4.12
CL10484.Contig3_All	3.24	3.05	2.84	5.74	6.33	5.68
CL10484.Contig4_All	4.56	6.39	5.35	3.69	3.53	3.97
CL10485.Contig1_All	0.51	0.6	0.62	3.22	3.67	4.02
CL10485.Contig3_All	2.96	3.11	3.15	5.29	6.46	5.56
CL10485.Contig5_All	4.46	5.87	4.38	3.42	3.57	2.39
CL10486.Contig1_All	27.18	29.63	27.58	22.31	23.59	23.97
CL10486.Contig2_All	11.78	9.97	11.08	7.36	6.77	6.65
CL10486.Contig3_All	49.52	46.6	52.34	25.05	23.71	24.57
CL10488.Contig2_All	1.16	0.71	0.98	5.45	5.17	5.96
CL10488.Contig3_All	1.19	1.04	1.38	4.98	5.03	5.38
CL1049.Contig3_All	9.63	9.08	12.09	8.82	8.93	8.94
CL1049.Contig4_All	2.35	2.6	1.94	1.49	1.72	0.96
CL1049.Contig6_All	0.49	0.33	0.78	0	0.16	0.19
CL10490.Contig3_All	0.28	0	0	1.9	2.79	0.85
CL10490.Contig5_All	1.81	1.56	1.89	5.63	6.52	6.15
CL10492.Contig1_All	2.48	2.82	3.18	8.89	10.55	7.49
CL10495.Contig1_All	4.64	4.66	5.1	9.61	9.69	9.37
CL10495.Contig2_All	1.92	2.32	2.65	3.6	3.71	4.08
CL105.Contig10_All	6.4	4.4	5.92	9.99	11.35	9.86
CL105.Contig11_All	5.15	5.57	5.91	0.11	0.54	0
CL105.Contig12_All	0.72	0.88	0.91	0.21	0.15	0.13
CL105.Contig1_All	2.77	1.72	2.16	1.16	1.08	1.39
CL105.Contig2_All	1.26	1.1	1.37	4.49	4.48	4.43
CL105.Contig3_All	5.82	7.33	6.94	3.9	3.25	3.76
CL105.Contig4_All	0.11	0.33	0.51	0	0.07	0
CL105.Contig5_All	1.64	2.34	2.17	0.15	0.36	0.21
CL105.Contig6_All	0.9	1.59	0.43	4.82	5.24	4.64
CL1050.Contig13_All	1.64	2.64	2.37	0	0	0
CL1050.Contig14_All	2.1	2.74	1.66	0.13	0.13	0.25
CL1050.Contig17_All	1.91	1.65	1.48	0.04	0.04	0.11
CL1050.Contig18_All	4.82	4.26	4.15	0	0	0
CL1050.Contig20_All	2.53	2.35	2.59	0	0	0
CL1050.Contig24_All	2.21	2.33	1.62	0.87	0.69	0.65
CL1050.Contig26_All	2.55	1.86	1.35	1.5	1.57	1.26
CL1050.Contig28_All	0.31	0.44	0.34	0.17	0.13	0
CL1050.Contig30_All	1.46	2.45	2.86	1.82	1.39	2.02
CL1050.Contig31_All	1.84	1.69	1.5	2.9	2.5	2.29
CL1050.Contig34_All	1.04	1.08	0.68	0.52	0.71	0.3
CL1050.Contig36_All	2.31	3.37	3.49	0	0.15	0.21
CL1050.Contig37_All	2.66	1.97	1.14	0	0	0
CL1050.Contig41_All	0	0	0	1.8	1.04	1.02
CL1050.Contig42_All	1.85	0.99	2	0	0	0
CL1050.Contig43_All	0	0	0	1.47	2.08	3.19
CL1050.Contig44_All	0.43	1.15	0.43	0	0	0
CL1050.Contig45_All	0.36	0.82	1.08	0	0	0
CL1050.Contig46_All	0.26	0.16	0	2.27	1.9	1.22
CL1050.Contig47_All	0.95	0.98	0.63	0	0.14	0
CL1050.Contig48_All	3.96	3.12	2.71	0	0	0
CL1050.Contig4_All	1.29	1.06	1.44	0	0	0
CL1050.Contig5_All	3.04	2.19	1.75	0.15	0.59	0.29
CL1050.Contig6_All	1.31	2.29	2.55	0	0	0
CL1050.Contig8_All	1.4	1.02	1.56	0	0	0
CL1050.Contig9_All	0.11	0.21	0.22	2.48	1.89	1.85
CL10500.Contig1_All	6.1	6.79	7.67	4.44	3.92	4.15
CL10500.Contig2_All	2.11	2.08	2.18	4.4	4.56	4.57
CL10501.Contig2_All	0	0	0	3.86	4.5	4.16
CL10502.Contig2_All	4	3.52	3.98	6.54	6.01	5.54
CL10506.Contig2_All	1.9	2.23	2.05	0.32	0.17	0.25
CL10506.Contig4_All	1.69	2.82	2.41	1.17	0.8	0.8
CL10507.Contig3_All	1.36	1.42	0.89	0	0	0
CL10507.Contig4_All	0.76	0.4	0.5	1.87	2.12	0.98
CL10509.Contig2_All	5.87	6.55	5.5	0.27	1.17	0.27
CL10509.Contig3_All	5.97	6.04	3.98	0	0	0
CL1051.Contig19_All	0.37	0.67	0.25	1.15	1.7	1.39
CL1051.Contig1_All	1.66	1.12	1.53	2.79	2.67	2.37
CL1051.Contig23_All	0.94	0.81	1.29	0.51	0.51	0.66
CL1051.Contig28_All	2.07	1.45	1.76	0.78	1.12	0.56
CL1051.Contig31_All	2.78	3.21	2.94	2.11	1.96	1.55
CL1051.Contig32_All	0.07	0.05	0	0.45	0.4	0.17
CL1051.Contig4_All	0.13	0	0.07	0.46	0.47	0.21
CL10510.Contig1_All	4.67	4.88	5.2	0.19	0	0
CL10511.Contig10_All	0.08	0.07	0.17	0.25	0.98	0.79
CL10511.Contig14_All	0.06	0	0	0.25	0.5	0.34
CL10511.Contig26_All	1.24	1.46	0.9	0.51	0.4	0.12
CL10511.Contig2_All	1.02	0.71	0.47	0.45	0	0.13
CL10511.Contig36_All	0.43	0.16	0.3	0	0	0.04
CL10511.Contig37_All	0.28	0.65	0.4	0	0	0
CL10511.Contig5_All	1.2	0.25	0.49	0.16	0.15	0
CL10511.Contig9_All	1.55	1.05	1.21	0.61	0.33	0.72
CL10512.Contig1_All	5.28	4.07	5.61	12.95	14.07	11.8
CL10512.Contig2_All	34.99	29.81	28.5	14.34	13.9	12.32
CL10512.Contig3_All	88.31	81.78	87.04	21.2	19.9	18.06
CL10512.Contig4_All	0	0	0	7.48	7.83	6.88
CL10513.Contig6_All	4.6	4.62	4.79	7.75	8.98	7.71
CL10514.Contig1_All	2.22	2.33	2	0.38	0.5	0.14
CL10514.Contig2_All	16.91	18.46	17.63	22.93	23.1	23.83
CL10515.Contig1_All	25.15	28.1	25.45	47.71	44.19	45
CL10515.Contig2_All	5.94	5.46	4.93	11.96	10.62	12.03
CL10515.Contig3_All	13.38	15.08	13.88	13.21	11.49	12.31
CL10515.Contig4_All	17.25	17.77	18.94	35.21	36.51	38.38
CL10516.Contig2_All	3.45	4.6	4.26	2.12	2.44	2.3
CL10517.Contig1_All	0.2	0.21	0	1.92	2.37	2.32
CL10517.Contig2_All	2.34	4.7	3.96	0.94	1.34	1.69
CL10518.Contig3_All	3.22	3.42	2.6	0.28	0.42	0.34
CL10519.Contig1_All	2.87	3.43	3.24	1.13	1.1	1.14
CL10519.Contig2_All	0.58	0.9	0.99	3.46	3.4	2.84
CL1052.Contig2_All	2.12	2.66	1.07	0.84	0.65	0.86
CL1052.Contig3_All	3.02	4.88	4.49	1.89	1.83	1.11
CL10521.Contig1_All	4.29	4.89	4.7	0.57	0.21	0.23
CL10521.Contig2_All	1.36	1.66	2.59	0.53	0.66	0.35
CL10521.Contig3_All	2.81	2.47	3.61	0.26	0.51	0.35
CL10523.Contig2_All	1.67	1.05	1.14	0	0.1	0.1
CL10524.Contig2_All	6.08	6.43	6.82	4.59	1.37	2.13
CL10527.Contig2_All	155.81	144.87	142.38	62.53	63.16	63.72
CL10528.Contig1_All	7.41	2.84	3.86	0.48	0.97	0
CL10529.Contig1_All	1.36	0.98	0.49	0.25	0.17	0.16
CL1053.Contig10_All	2.12	1.51	2.02	7.9	6.25	6.3
CL1053.Contig2_All	0.97	1.22	1.06	5.21	6.06	5.2
CL1053.Contig3_All	11.02	10.28	10.92	2.2	1.07	1.86
CL1053.Contig4_All	1.04	1.09	1.44	0.05	0.11	0.11
CL1053.Contig5_All	0.41	0.84	0.3	0.16	0.14	0.23
CL1053.Contig7_All	0.57	0.28	0.47	2.61	2.5	2.63
CL1053.Contig9_All	0.48	0.75	0.55	0	0	0.06
CL10530.Contig1_All	10.65	12.23	11.68	15.47	18.43	17.09
CL10531.Contig1_All	1.87	2.55	3.14	0	0	0
CL10531.Contig2_All	6.27	4.53	5.28	1.63	2.69	1.79
CL10532.Contig2_All	1.01	1.94	1.84	0.24	0.39	0.36
CL10533.Contig1_All	0.76	0.62	0.54	3.02	2.98	3.09
CL10533.Contig2_All	0.51	0.31	0.93	3.14	3.06	2.92
CL10534.Contig1_All	1.91	2.02	1.51	0	0.26	0
CL10536.Contig1_All	1.8	1.69	2.08	3.69	3.42	3.4
CL10536.Contig2_All	4.79	4.14	4.56	3.2	3.4	3.72
CL10537.Contig1_All	3.56	2.96	1.73	0	0	0.47
CL10537.Contig2_All	2.71	1.51	2.49	0.13	0.76	0
CL1054.Contig2_All	2.14	1.01	1.17	3.43	3.79	3.86
CL1054.Contig4_All	1.68	1.81	2.07	1.57	0.31	0.61
CL10540.Contig1_All	359.32	363.48	410.4	527.48	546.35	498.15
CL10540.Contig2_All	7.35	5.57	5.46	0.53	0.82	0.38
CL10540.Contig4_All	55.74	50.69	58.44	76.11	79.35	75.35
CL10542.Contig2_All	1.06	0.46	0.62	4.54	3.46	5.15
CL10543.Contig2_All	5.4	5.09	5.79	8.08	9.48	9.26
CL10543.Contig3_All	8.65	8.83	8.85	12.82	12.88	12.7
CL10543.Contig4_All	19.06	18.19	18.72	30.37	31.8	32.1
CL10544.Contig2_All	3.16	3.42	3.86	4.29	4.85	4.82
CL10544.Contig5_All	1.67	1.22	1.62	2.21	2.11	2.16
CL10546.Contig2_All	8.59	4.63	5.64	2.89	1.52	2.42
CL10546.Contig3_All	19.9	19.63	22.97	9.72	8.51	10.72
CL10547.Contig2_All	1.76	1.6	1.91	0.85	0.62	1.13
CL10548.Contig2_All	13.77	14.26	16.66	9.46	8.32	10.34
CL10549.Contig2_All	0.91	0.85	1.02	0	0	0
CL1055.Contig6_All	8.85	9.38	9.91	31.41	33.44	30.19
CL1055.Contig7_All	7.94	8.59	8.15	0.8	0.73	0.59
CL1055.Contig8_All	3.03	3.8	4.93	0.32	0.59	0.37
CL1055.Contig9_All	4.74	4.69	4.54	1.18	1.09	1.37
CL10551.Contig1_All	1.03	0.99	0.51	2.65	1.72	2.11
CL10551.Contig2_All	1.54	1.5	1.37	3.72	3.88	2.9
CL10551.Contig3_All	1.24	0.8	1.5	3.29	3.21	3.43
CL10551.Contig4_All	2.23	2.48	2.11	5.23	4.97	4.89
CL10553.Contig2_All	1.28	1.78	1.29	2.94	2.98	2.87
CL10558.Contig1_All	0.52	0.18	0.05	1.23	0.72	1.76
CL10558.Contig2_All	5.21	4.52	4.56	9.41	9.57	8.41
CL10559.Contig1_All	2.82	2.17	3.28	1.56	1.29	1.46
CL10559.Contig2_All	13.07	11.82	12.78	17.43	17.83	17.89
CL10562.Contig1_All	15.77	16.53	16.54	11.31	10.96	10.45
CL10562.Contig2_All	0.29	0.4	0.47	0.14	0.09	0.19
CL10562.Contig4_All	4.4	4.91	4.55	3.79	4	2.95
CL10564.Contig10_All	0.67	0.89	0.86	4.12	4.14	3.07
CL10564.Contig1_All	0.12	0.29	0.15	2.59	2.71	1.91
CL10564.Contig3_All	0.61	0.82	0.54	0.13	0	0
CL10564.Contig6_All	1.54	1.39	1.09	4.4	4.17	4.08
CL10564.Contig8_All	2.06	2.77	2.81	0.77	0.39	0.87
CL10567.Contig2_All	0.9	0.95	0.82	3.72	6.85	4.73
CL10567.Contig3_All	0.19	0.62	0.47	1.89	2.08	1.17
CL10568.Contig6_All	13.8	13.03	13.6	12.3	12.24	10.21
CL10569.Contig5_All	0.54	0.57	0.31	0.13	0.19	0
CL10569.Contig6_All	0.58	0.77	0.41	1.67	1.91	1.96
CL1057.Contig11_All	0.68	1.31	0.96	0.09	0.21	0.2
CL1057.Contig2_All	0.35	0.33	0.48	1.93	2.09	1.47
CL1057.Contig5_All	3.18	2.32	2.62	0.69	0.96	1.05
CL10570.Contig1_All	2.5	2.19	2.66	6.44	5.91	4.63
CL10570.Contig3_All	0.34	0.7	0.88	0	0	0
CL10571.Contig1_All	10.37	10.49	10.76	16.07	15.94	17.68
CL10571.Contig2_All	12.3	13.83	12.66	22.5	21.16	21.91
CL10571.Contig3_All	9.26	9.31	10.02	18.46	21.34	20.4
CL10571.Contig4_All	9.77	12.27	11.39	18.26	17.91	18.02
CL10573.Contig2_All	0.96	0.75	1.43	3.59	3.78	2.96
CL10573.Contig4_All	1.99	1.57	1.5	0.99	1.16	0.73
CL10575.Contig2_All	0	0	0	0.42	0.44	1.03
CL10575.Contig3_All	12.32	11.1	10.65	6.77	8.47	8.13
CL10578.Contig2_All	1.97	2.63	2.24	1.26	1.07	1.76
CL10579.Contig2_All	6.92	5.61	6.74	10.44	9.01	8
CL1058.Contig1_All	23.18	24.76	22.9	40.13	38.73	35.51
CL1058.Contig2_All	18.99	15.99	16.83	8.97	8.35	7.49
CL1058.Contig4_All	15.45	15.52	16.33	26.85	25.47	26.29
CL1058.Contig5_All	27.88	29.83	29.97	53.07	49.24	49.49
CL10580.Contig1_All	4.87	3.36	3.41	0	0	0
CL10580.Contig2_All	0	0	0	3.34	2.54	3.69
CL10582.Contig2_All	5.36	6.06	5.63	12.78	10.95	11.13
CL10582.Contig3_All	5.16	3.6	3.45	0.32	0.58	0.71
CL10583.Contig4_All	0	0	0.2	5.23	4.69	4.39
CL10584.Contig1_All	11.87	10.1	10.09	21.28	18.7	21.74
CL10584.Contig2_All	13.31	12.43	12.47	32.03	34.35	32.09
CL10585.Contig3_All	0	0.15	0	1.05	1.74	0.36
CL10586.Contig3_All	4.01	4.86	4.55	7.89	6.96	7.8
CL10587.Contig2_All	17.08	16.65	18.22	21.72	22.59	21.58
CL1059.Contig1_All	16.99	18.89	17.39	6.65	6.32	6.07
CL1059.Contig2_All	11.38	11.74	11.38	33.87	35.44	33.36
CL10591.Contig3_All	4.17	3.8	4.66	6.47	6.62	6.67
CL10592.Contig1_All	1.08	1.11	0.96	4.95	6.01	5.03
CL10592.Contig2_All	5.17	6.83	6.28	5.37	4.4	4.41
CL10595.Contig1_All	10.96	10.14	11.13	9.16	10.71	9.77
CL10595.Contig2_All	8.26	6.95	6.52	3.28	3.68	4.28
CL10595.Contig4_All	0.85	0.78	0.6	0.31	0.26	0.28
CL10595.Contig6_All	1.24	1.68	1.69	5.32	4.72	4.67
CL10598.Contig1_All	0.65	0.67	0.67	0.13	0	0
CL106.Contig10_All	2.01	2.46	2.01	0.19	0.43	0.42
CL106.Contig11_All	3.21	3.22	2.34	0.04	0	0.21
CL106.Contig14_All	0.51	0.45	0.41	0.12	0	0.04
CL106.Contig16_All	0.33	0.6	0.54	0.14	0	0.4
CL106.Contig17_All	0.79	1.07	1.29	0.42	0.5	0
CL106.Contig23_All	2.06	1.94	1.9	3.5	3.44	2.72
CL106.Contig24_All	1.44	0.52	0.53	2.8	2.78	2.61
CL106.Contig25_All	2.15	2.16	0.32	0.33	0	0.15
CL106.Contig27_All	0	0	0	0.6	0.61	0.18
CL106.Contig28_All	2.43	4.16	2.8	0.31	0.41	0.43
CL106.Contig29_All	6.14	5.01	7.97	1.18	2.88	2.26
CL106.Contig33_All	24.06	27.43	24.5	17.3	14.23	20.51
CL106.Contig34_All	4.01	3.34	4.25	2.17	2.12	2.4
CL106.Contig35_All	0	0	0	1.09	1.05	1.42
CL106.Contig36_All	6.06	8.05	6.88	13.36	15.28	15.31
CL106.Contig37_All	46.78	58.36	54.77	16.36	13.79	12.42
CL106.Contig3_All	0.3	0.57	1.03	0	0.16	0.14
CL106.Contig5_All	16.05	14.71	14.75	2.25	2.42	2.16
CL106.Contig7_All	3.21	2.88	1.41	1.88	1.73	1.05
CL1060.Contig11_All	2.07	2.5	1.97	0.68	0.43	0.54
CL1060.Contig12_All	0.32	0.2	0.25	0.82	0.5	1.38
CL1060.Contig13_All	0.1	0.09	0.82	2.32	1.31	1.07
CL1060.Contig14_All	0.26	0.31	0.41	0	0	0.04
CL1060.Contig16_All	1.87	2.1	2.14	4.93	4.9	5.43
CL1060.Contig17_All	20.75	22.6	20.85	12.16	13.18	14.09
CL1060.Contig21_All	0.57	0.38	0.2	1.62	1.26	1.82
CL1060.Contig23_All	1.27	1.16	1.96	0.79	0.39	0.26
CL1060.Contig25_All	3.62	4.43	3.51	0	0	0
CL1060.Contig2_All	0.09	0	0.11	0.75	0.7	1.25
CL1060.Contig4_All	0.58	0.76	0.6	2.24	1.61	1.2
CL1060.Contig6_All	1.3	1.91	1.95	7.17	7.23	7.65
CL10600.Contig1_All	7.22	8.21	5.9	13.25	10.63	11.68
CL10600.Contig2_All	0.71	0.39	0.83	1.92	2.57	2.82
CL10600.Contig3_All	5.21	5.6	5.54	2	1.1	1.19
CL10600.Contig4_All	1.63	2.21	2.22	0.56	0.97	0.48
CL10601.Contig4_All	0.78	0.43	0.46	1.64	1.77	2.2
CL10601.Contig5_All	5.15	6.08	6.79	5.16	5.91	4.05
CL10602.Contig3_All	2.24	1.37	2.12	3.83	3.54	3.15
CL10603.Contig1_All	2.32	2.55	2.36	4.28	5.16	4.48
CL10604.Contig1_All	0.51	0.1	0.42	1.43	1.56	0.89
CL10604.Contig2_All	9.97	10.66	7.92	23.45	21.29	14.47
CL10606.Contig1_All	0.38	0.26	0.4	3.18	3.89	2.77
CL10606.Contig2_All	1.79	2.09	2.69	9.99	7.46	8.16
CL10606.Contig3_All	13.52	12.16	11.04	2.94	2.87	3.12
CL10606.Contig4_All	1.87	1.83	1.61	0.68	0.66	0.97
CL10609.Contig2_All	0.05	0.11	0.05	1.39	1.82	1.35
CL10610.Contig4_All	0.92	1.95	1.54	0	0.39	0
CL10611.Contig6_All	0	0	0	2.64	1.65	2.7
CL10613.Contig2_All	2.52	1.62	2.03	0	0	0
CL10613.Contig3_All	1.62	2.05	2.08	0.65	0.4	0.65
CL10615.Contig1_All	53.13	51.99	43.08	43.96	44.26	41.53
CL10615.Contig2_All	61.57	58.9	65.53	62.08	62.87	59.69
CL10615.Contig3_All	4.84	1.7	6.34	8.6	8.58	14.97
CL10616.Contig3_All	0.59	0.69	0.53	0.12	0.21	0.08
CL10617.Contig1_All	1.46	0.51	1.84	0	0	0
CL10617.Contig4_All	1.86	1.4	1.79	5.01	4.46	4.62
CL10624.Contig1_All	14.23	14.24	14.85	3.82	4.16	4.08
CL10624.Contig2_All	3.68	2.85	4.17	7.82	7.12	7.45
CL10626.Contig2_All	3.5	3.34	4.08	12.79	12.16	12.58
CL10626.Contig3_All	31.74	35.37	34.76	12.85	14.79	13.07
CL10627.Contig1_All	15.93	15.66	14.65	0.49	0.49	0.91
CL10627.Contig2_All	1.51	1.08	1.87	0.48	0.35	0.13
CL10628.Contig2_All	2.15	2.19	2.42	3.49	4.06	3.47
CL10628.Contig3_All	3.15	2.95	3.08	5.48	5.52	4.58
CL10628.Contig4_All	4.61	5.82	5.11	11.2	11.34	11.02
CL10628.Contig6_All	0.96	1.34	1.3	2.4	2.51	2.8
CL10629.Contig2_All	2.65	3.26	2.74	1.7	1.06	1.38
CL1063.Contig3_All	2.9	4.13	4.23	1.28	1.51	0.88
CL10634.Contig1_All	12.94	12.44	13.38	9.82	10.19	9.42
CL10634.Contig2_All	2.94	2.65	2.72	6.14	5.47	4.69
CL10634.Contig3_All	19.05	21.34	20.27	19.97	18.36	18.38
CL10636.Contig5_All	3.18	2.58	3.25	4.52	4.31	4.04
CL10638.Contig1_All	1.37	0.48	1.47	0	0	0
CL10639.Contig1_All	4.8	4.68	4.47	6.09	7.63	6.5
CL1064.Contig3_All	2.27	2.97	3.43	5.18	5.5	5.21
CL10641.Contig2_All	7.17	6.88	9.65	3.04	3.08	2.77
CL10641.Contig3_All	0.59	0.15	0.49	0.99	1.42	1.33
CL10645.Contig1_All	5.95	7.33	5.72	14.68	16.79	14.96
CL10649.Contig2_All	0.83	0.83	0.84	0.4	0.23	0.34
CL10649.Contig4_All	0.82	0.29	0.28	2.29	1.81	1.73
CL1065.Contig3_All	14.73	14.33	15.61	7.33	8.84	6.96
CL1065.Contig4_All	4.89	2.96	3.5	0	0	0
CL1065.Contig6_All	2.37	3.86	3.28	0	0	0
CL1065.Contig7_All	2.18	4.52	2.89	0.39	0.46	0.48
CL1065.Contig8_All	2.06	0.92	1.71	0	0	0.08
CL1065.Contig9_All	1.91	0.91	1.41	4.27	4.73	3.69
CL10650.Contig1_All	3.38	2.79	3	1.89	2.43	1.88
CL10650.Contig2_All	2.22	2.72	2.9	0.99	0.86	0.52
CL10651.Contig1_All	1.04	1.68	2.64	5.94	5.2	5.39
CL10651.Contig2_All	3.19	4.47	6.63	2.79	1.81	1.88
CL10652.Contig1_All	3.96	3.29	3.94	0.05	0	0
CL10652.Contig2_All	4.69	4.31	4.11	9.44	9.41	10.32
CL10652.Contig3_All	5.17	6.44	6.05	0	0.2	0
CL10655.Contig2_All	2.14	2.52	2.08	12.32	12.95	12.33
CL10656.Contig1_All	4.36	5.05	4.56	7.65	8.12	6.85
CL10657.Contig1_All	1.43	1.86	1.16	4.04	4.37	4.54
CL10657.Contig2_All	3.39	3.08	3.75	10.62	12.28	12.76
CL10658.Contig2_All	0.87	0.55	0.92	2.11	2.39	2.18
CL10659.Contig2_All	0	0	0	0.44	0.85	2.04
CL10659.Contig3_All	1.41	3.03	1.43	3.88	3.31	3.08
CL10660.Contig2_All	1.32	1.2	0.71	3.56	3	2.75
CL10662.Contig2_All	0.95	0.52	0.86	3.53	3.26	2.71
CL10662.Contig3_All	2.03	1.88	2.37	0.25	0.23	0.12
CL10665.Contig2_All	0.59	0.57	0.56	0	0	0
CL10666.Contig1_All	0	0	0	0.68	1.38	1.68
CL10668.Contig3_All	5.16	4.43	5.24	3.95	4.12	4.06
CL1067.Contig10_All	0	0	0.35	0.83	0.86	0.97
CL1067.Contig3_All	0.73	0.6	0.72	1.89	2.06	2.11
CL1067.Contig9_All	0.68	0.52	0.53	2.28	1.47	1.33
CL10670.Contig3_All	2.97	4.12	2.24	0	0.32	0
CL10671.Contig1_All	0.82	1.65	0.8	0	0	0
CL10671.Contig2_All	1.89	0.71	0.27	0	0	0
CL10672.Contig3_All	54.69	60.31	63.8	6.6	7.52	6.27
CL10673.Contig2_All	0.88	0.95	1.02	0.36	0	0.63
CL10674.Contig3_All	1.42	3.16	3.31	6.67	5.33	5.82
CL10674.Contig4_All	6.21	5.31	5.09	9.46	8.34	10.02
CL10675.Contig2_All	15.15	16.83	15.23	25.55	26.72	27.09
CL10675.Contig3_All	18.85	18.25	20.91	37.04	42.37	40.13
CL10675.Contig4_All	3.24	4.3	3.48	9.24	9.29	8.06
CL10676.Contig1_All	0.5	0.62	0.21	4.23	4.49	3.5
CL10676.Contig2_All	0.58	0.83	0.95	3.82	3.26	1.9
CL10678.Contig3_All	1.85	1.18	1.12	0.51	0.29	0.45
CL10679.Contig1_All	19.48	18.59	16.93	16.25	15.02	15.91
CL10679.Contig2_All	16.18	15.11	15.25	29.4	26.97	25.45
CL1068.Contig5_All	1.68	2.17	3.33	0.64	0.76	1.05
CL1068.Contig6_All	7.42	8.29	7.35	6.16	7.16	4.5
CL10680.Contig3_All	1.52	1.49	1.46	1.01	0.94	0.75
CL10684.Contig4_All	3.73	3.98	3.95	2.5	2.29	3.02
CL10687.Contig2_All	0.86	0.43	0.68	2.27	1.85	1.46
CL1069.Contig1_All	4.45	3.8	4.46	3.31	3.9	3.83
CL10690.Contig1_All	0.82	0.65	1.61	0	0	0.13
CL10690.Contig2_All	4.81	3.85	4.02	2.6	2.08	2.14
CL10691.Contig1_All	1.52	2.68	3.42	0.57	0.69	0.49
CL10691.Contig2_All	2.68	3.08	1.77	0.11	0	0
CL10691.Contig3_All	8.73	6.81	8.17	3.13	3.74	4.28
CL10691.Contig4_All	4.59	4.24	5.08	1.84	1.86	1.57
CL10693.Contig1_All	1.2	1.64	1.66	4.24	4.15	4.31
CL10694.Contig1_All	3.52	2.86	2.66	4.22	4.49	5.07
CL10694.Contig2_All	6.71	7.13	6.33	9.9	10.46	9.49
CL10694.Contig3_All	13.5	13.84	15.49	20.06	22.58	21.84
CL10696.Contig1_All	0	0	0	0.21	0.06	0.32
CL10697.Contig1_All	1	1.04	1.75	2.86	3.35	3.27
CL10699.Contig1_All	0.43	0.27	0.88	2.6	3.65	3.81
CL10699.Contig2_All	0	0	0	0.68	1.16	1.4
CL107.Contig11_All	118.48	132.46	115.87	207.56	201.34	200.43
CL107.Contig12_All	925.95	973.94	1016.1	954.34	931.01	903.17
CL107.Contig14_All	2.31	2.38	1.96	4.82	4.19	4.76
CL107.Contig15_All	331.01	341.06	315.66	436.88	405.61	423.8
CL107.Contig16_All	23.82	25.4	24.23	7.09	6.31	7.6
CL107.Contig17_All	46.33	47.89	49.69	45.35	46.64	47.1
CL107.Contig18_All	3.18	3.24	2.18	26.08	23.65	21.57
CL107.Contig19_All	195.1	200.99	205.83	140.19	145.45	140.88
CL107.Contig1_All	7.09	6.34	6.43	5.04	5.24	6.3
CL107.Contig23_All	60.12	59.61	51.92	57.97	58.63	61.51
CL107.Contig25_All	495.29	497.79	499.26	616.46	606.58	607.33
CL107.Contig26_All	4.56	4.48	5.41	12.28	14.4	13.21
CL107.Contig27_All	7.71	7.79	8.71	2.55	2.49	2.54
CL107.Contig28_All	4.41	4.32	5.76	3.81	4.1	4.33
CL107.Contig2_All	616.14	632.95	693.78	1041.43	1093.53	1120.58
CL107.Contig30_All	0	0	0	4.56	3.08	4.5
CL107.Contig3_All	452.7	455.6	445.55	454.23	434.22	438.88
CL107.Contig4_All	122.93	121.62	127.72	36.04	38.31	37.73
CL107.Contig5_All	49.03	67.72	65.18	30.87	33.89	32.42
CL107.Contig6_All	173.99	173.86	171.13	113.12	114.43	115.47
CL107.Contig7_All	49.49	48.89	44.24	70.33	68.5	73
CL107.Contig8_All	41.24	35.24	34.78	65.19	61.75	66.01
CL1070.Contig1_All	1.54	1.29	1.42	2.72	3.7	3.43
CL1070.Contig2_All	0.96	1.73	1.95	0.23	0.53	0.45
CL10702.Contig2_All	0	0	0	1.43	3.14	0.94
CL10704.Contig2_All	1.89	2.34	2.33	4.78	4.83	4.43
CL10706.Contig2_All	20.31	17.19	20.81	29	25.3	27.64
CL10706.Contig3_All	99.16	100.18	92.01	89.02	92.83	93.18
CL10707.Contig1_All	6.03	5.7	5.98	14.7	20.08	15.36
CL10707.Contig2_All	0.49	0.77	0.67	8.48	7.46	7
CL10707.Contig4_All	0.92	0.64	1.12	5.71	5.21	5.5
CL10709.Contig1_All	3.26	3.57	1.73	7.31	5.64	4.84
CL1071.Contig1_All	9.32	8.65	8.66	5.09	4.92	4.97
CL1071.Contig3_All	1.61	1.55	0.99	0.16	0.19	0.15
CL1071.Contig4_All	0.58	0.67	0.94	6.76	4.82	6.03
CL1071.Contig7_All	0.54	0.58	0.61	1.38	0.67	1.47
CL1071.Contig9_All	1.98	1.95	2.81	5.53	5.84	6.59
CL10710.Contig2_All	1.24	0.9	0.89	4.17	3.74	3.94
CL10712.Contig1_All	1.75	1.78	1.6	3.39	2.78	3.29
CL10712.Contig2_All	0.54	0.36	1.22	0.26	0.3	0.31
CL10713.Contig2_All	0.51	0.77	0.4	2.78	3.47	3.09
CL10718.Contig1_All	5.13	6.26	5.42	1.54	1.93	1.18
CL10718.Contig2_All	4.49	2.98	3.31	0.9	0.61	0.3
CL1072.Contig6_All	2.09	1.49	1.51	3.55	4.17	3.74
CL10721.Contig14_All	0	0	0	8.68	7.71	6.82
CL10721.Contig15_All	3.46	2.96	2.76	0.7	0.63	0.9
CL10721.Contig16_All	8.71	9.79	9.22	1.47	1.21	1.67
CL10721.Contig17_All	0.43	0.84	0.94	0	0.05	0.17
CL10721.Contig18_All	1.24	0.95	1.44	0.25	0.69	0.44
CL10721.Contig19_All	4.02	3.05	4.44	1.49	1.22	0.93
CL10721.Contig23_All	5.42	3.85	4.51	1.33	1.26	1.14
CL10721.Contig25_All	0.94	1.11	0.99	0.4	0.65	0.63
CL10721.Contig32_All	1.03	0.67	0.98	6.51	6.67	6.79
CL10721.Contig34_All	1.48	1.69	0.7	3.96	3.79	3.97
CL10721.Contig35_All	0.26	0.23	0.13	1.15	0.65	0.93
CL10721.Contig42_All	0.64	0.46	0.64	0.37	0.31	0.24
CL10721.Contig45_All	0.25	0.36	0.62	3.61	3.15	3.49
CL10721.Contig49_All	0.25	0.93	1.03	0.17	0	0.06
CL10721.Contig6_All	1.66	1.94	2.36	0.42	0.29	0.84
CL10721.Contig7_All	1.33	1.11	0.83	0.13	0	0.06
CL10722.Contig1_All	0.45	0.29	0.34	2.53	3.02	2.18
CL10723.Contig1_All	0	0	0	6.54	6.25	5.69
CL10723.Contig2_All	0	0	0	0.55	0.43	0.54
CL10724.Contig1_All	16.38	12.17	15.71	4.64	5.36	6.35
CL10724.Contig2_All	6.89	3.99	8.84	24.03	24.17	24.63
CL10724.Contig4_All	1.53	1.88	2.57	5.67	4.8	5.7
CL10725.Contig2_All	8.96	7.69	8.19	3.42	3.09	4.09
CL10726.Contig1_All	1.11	0.91	0.94	2.47	2.2	1.96
CL10726.Contig2_All	8.11	7.53	8.7	11.45	11.32	12.49
CL10729.Contig1_All	13.41	11.75	13.07	17.57	19.38	20.11
CL10729.Contig2_All	11.8	10.84	11.91	16.67	17.39	14.84
CL10729.Contig3_All	5.02	5.84	6.85	8.95	9.51	10.4
CL10729.Contig4_All	7.2	8.93	7.84	11.83	12.15	11.21
CL10730.Contig2_All	1.02	0.97	0.8	0.54	0.57	0.56
CL10730.Contig4_All	16.3	16.09	17.89	24.84	25.14	26.45
CL10734.Contig2_All	59.33	61.43	64.46	29.38	32.26	31.51
CL10734.Contig4_All	4.11	4.17	4.97	35.56	36.45	35.3
CL10734.Contig5_All	180.42	198.51	192.58	274.1	282.62	267.67
CL10734.Contig7_All	39.11	42.61	42.86	71.31	70.77	71.18
CL10734.Contig8_All	2.81	2.47	1.16	0.94	0.6	0.53
CL10735.Contig3_All	5.42	4.62	5.27	7.78	9.03	7.69
CL10736.Contig2_All	18.19	19.38	19.42	24.82	25.75	23.35
CL10738.Contig2_All	1.96	2.99	1.69	0.44	0.2	0.09
CL1074.Contig12_All	0	0	0	1.78	0.39	0.67
CL1074.Contig17_All	1.85	1.17	3.86	6.7	9.84	13.57
CL1074.Contig21_All	16.64	14.32	14.04	21.41	20.36	21.34
CL1074.Contig25_All	7	6.96	6.16	2.31	2.34	2.3
CL1074.Contig30_All	1.26	1.87	0.27	0	0	0
CL1074.Contig3_All	2.33	1.76	1.97	3.57	4.24	3.81
CL1074.Contig4_All	2.54	2.57	2.02	7.95	7.43	6.77
CL10740.Contig2_All	8.23	8.24	8.59	16.36	15.25	15.5
CL10741.Contig2_All	1.49	0.61	0.91	2.75	3.2	3.56
CL10742.Contig2_All	6.83	5.63	5.05	10.22	9.76	11.18
CL10744.Contig1_All	3.44	4.06	2.99	7.07	12.08	8.78
CL10745.Contig2_All	71.22	74.56	68.6	108.62	101.04	101.63
CL10748.Contig1_All	1.32	1.57	1.78	8.62	8.63	9.08
CL10749.Contig2_All	7.32	6.3	7.47	14.83	15.99	12.79
CL1075.Contig11_All	0.24	0.11	0.13	0	0	0
CL1075.Contig12_All	0.03	0.06	0.06	0.64	0.77	0.54
CL1075.Contig14_All	0.37	0.38	0.14	0	0	0.17
CL1075.Contig15_All	0.43	0.48	0.5	1.13	1.34	0.78
CL1075.Contig21_All	0.22	0.18	0.28	0.92	0.88	0.97
CL1075.Contig23_All	0.48	0.46	0.33	0.8	1.49	1.44
CL1075.Contig25_All	0.23	0.08	0.3	0	0.05	0
CL1075.Contig36_All	1.84	3.15	2.3	1.61	1.51	2.12
CL1075.Contig40_All	0.55	0.43	0.73	0.26	0.24	0.13
CL1075.Contig8_All	0.38	0.32	0.2	0.83	1.23	0.59
CL1075.Contig9_All	0.82	0.61	0.7	0.29	0.28	0
CL10750.Contig4_All	0.19	0.1	0.19	2.52	1.28	1.35
CL10750.Contig5_All	0	0	0	1.01	1.7	2.64
CL10751.Contig1_All	3.93	3.04	3.17	31.2	27.96	31.74
CL10751.Contig3_All	6.15	6.8	8.07	17.73	17.36	17.31
CL10752.Contig1_All	13.2	10.15	14.5	0.9	0.78	1.67
CL10752.Contig2_All	47.11	39.55	47.73	70.98	76.55	79.9
CL10752.Contig3_All	51.19	47.65	45.3	75.34	79.72	77.01
CL10753.Contig3_All	0.24	0.39	0.1	0	0	0
CL10755.Contig1_All	6.57	6.48	7.22	2.63	2.3	4.43
CL10755.Contig2_All	2.85	2.91	2.79	2.21	2.27	2.52
CL10757.Contig1_All	3.49	3.87	5.15	0.86	1.08	1.12
CL10757.Contig2_All	17.52	17.07	17.04	12.37	12.12	13.85
CL10759.Contig2_All	24.54	25.84	27.16	25.65	24.29	23.68
CL1076.Contig2_All	1.13	0.88	1.43	4.54	3.49	3.19
CL1076.Contig3_All	0.11	0.05	0.19	26.39	25.24	25.01
CL1076.Contig4_All	2.07	1.68	2.37	14.28	12.41	13.15
CL1076.Contig6_All	7.99	8.35	7.09	1.66	1.71	2.13
CL10760.Contig1_All	1.33	1.73	1.29	0.28	0.27	0.59
CL10760.Contig2_All	2.88	2.64	3.51	0.95	1.68	1.57
CL10762.Contig1_All	0.92	0.7	0.42	0.05	0.16	0.15
CL10762.Contig3_All	1.81	1.55	1.91	5.2	4.58	3.79
CL10762.Contig4_All	10	11.55	10.57	25.91	26.49	25.48
CL10764.Contig2_All	5.23	4.42	3.38	9.24	12.16	9.74
CL10765.Contig1_All	8.1	8.37	8.42	0.18	0.1	0.13
CL10766.Contig1_All	1.4	0.86	2.14	0.13	0.23	0.81
CL10766.Contig2_All	2.05	3.04	3.26	0.79	0.61	0.53
CL10766.Contig3_All	1.06	0.92	1.28	0.61	0.59	0.26
CL10768.Contig2_All	10.7	10.77	10.58	16.56	15.65	15.32
CL10769.Contig2_All	8.72	7.94	10.24	0.31	0.38	0.37
CL10769.Contig3_All	8.63	6.31	5.02	1.11	0.94	1.05
CL1077.Contig4_All	0.46	0.73	0.84	1.81	1.78	1.63
CL10770.Contig1_All	0	0	0	0.89	1.81	0.59
CL10772.Contig1_All	0.58	1.54	1.31	3.01	3.28	2.55
CL10772.Contig2_All	25.99	25.93	22.46	23.74	24.58	23.7
CL10773.Contig1_All	0.51	0.52	0.41	18.76	20	19.49
CL10773.Contig2_All	0.69	0.52	0.42	19.16	17.85	17.09
CL10773.Contig3_All	0.5	0.13	0.77	3.21	3.38	2.04
CL10775.Contig2_All	3.57	5.88	4.67	0.84	0.35	0.91
CL10776.Contig1_All	32.94	35.94	33.08	7.6	8.15	6.63
CL10777.Contig3_All	2.59	1.54	3.1	8.83	9.36	7.62
CL10778.Contig1_All	3.67	3.62	3.61	1.63	1.57	1.32
CL10778.Contig2_All	1.43	1.15	1.55	2.81	2.28	2.87
CL10778.Contig3_All	1.56	1.82	2.13	1.32	1.05	1.23
CL10778.Contig4_All	2.59	2.7	2.33	0.3	0.1	0.13
CL10779.Contig1_All	0.88	0.59	0.51	1.58	1.68	1.63
CL10779.Contig2_All	1.44	2.04	2.44	4.69	4.73	4.88
CL1078.Contig10_All	0	0	0	0.29	0.45	0.63
CL1078.Contig11_All	1.02	0.89	2.14	2.12	2.53	2.94
CL1078.Contig18_All	2.35	1.98	1.49	1.42	0.89	0.6
CL1078.Contig22_All	1.35	0.77	0.58	0.41	0.09	0
CL1078.Contig23_All	2.72	1.77	3.42	1.79	2.04	1.72
CL1078.Contig24_All	0.45	0.73	0.55	0	0	0
CL1078.Contig9_All	0.44	0.31	0.42	1.42	1.12	1.28
CL10782.Contig1_All	1.6	1.23	2.28	0.11	0	0.11
CL10782.Contig2_All	2.7	2.96	2.77	1.86	0.98	0.96
CL10786.Contig2_All	1.76	2.86	2.2	0.83	1.22	1.49
CL10787.Contig2_All	9.69	9.77	10.17	13.33	14.57	12.22
CL10788.Contig1_All	102.22	101.6	99.04	29.21	29.69	27.04
CL10788.Contig2_All	36.43	34.68	30.39	2.51	1.68	1.81
CL10788.Contig3_All	6.56	9.51	5.95	13.27	10.52	11.49
CL10788.Contig4_All	40.92	38.76	45.61	19.41	16.64	18.14
CL10788.Contig5_All	35.17	31.48	32.32	9.08	8.8	8.41
CL10789.Contig1_All	3.55	3.27	3.91	2.55	1.58	1.3
CL1079.Contig1_All	25.62	24.65	29.64	121.26	119.04	113.98
CL1079.Contig2_All	4.5	3.82	3.92	29.74	28.72	25.8
CL1079.Contig3_All	31.04	30.62	28.88	80.05	85.23	83.29
CL1079.Contig4_All	44.86	48.95	49.06	4.19	4.45	4.09
CL10790.Contig1_All	1.59	1.67	1.88	0.21	0.42	0.41
CL10791.Contig1_All	0.25	1.58	0.24	3.69	3.97	2.81
CL10793.Contig2_All	91.64	93.01	90.82	33.74	36.03	35.16
CL10794.Contig1_All	1.81	2.13	1.19	4.49	4.47	4.08
CL10797.Contig2_All	8.8	7.29	9.71	4.24	4.34	3.85
CL10799.Contig1_All	1.41	1.85	1.6	0.6	0.54	0.6
CL108.Contig2_All	0.69	0.52	0.61	3.84	4.1	4.55
CL108.Contig3_All	0.04	0	0	0.43	0.35	0.2
CL108.Contig4_All	0	0	0	0.63	0.6	0.43
CL108.Contig7_All	0.7	1.36	0.81	2.77	2.2	2.42
CL108.Contig8_All	0.26	0.11	0.12	0.59	1.09	0.74
CL1080.Contig3_All	2.56	1.95	1.1	0.66	0.36	0.39
CL1080.Contig4_All	4.21	4.75	4.35	7.43	8.79	7.65
CL10800.Contig1_All	0.21	0.23	0.14	0.06	0	0
CL10800.Contig3_All	3.94	3.9	3.93	5.32	5.79	5.45
CL10801.Contig1_All	0.77	0.37	0.58	1.61	0.97	1.25
CL10801.Contig2_All	7.58	6.85	7.24	5.26	5.99	5.95
CL10802.Contig2_All	0.9	0.67	0.53	0	0	0
CL10803.Contig2_All	1.67	1.96	1.82	1.63	1.09	1.28
CL10806.Contig4_All	33.37	29.84	30.76	48.19	49.01	43.93
CL10807.Contig2_All	0.93	0.94	0.89	2.95	2.73	3.13
CL10807.Contig4_All	4.85	4.97	5.98	7.58	8.14	7.28
CL10807.Contig6_All	1.15	1.19	1.47	0.12	0.14	0
CL10807.Contig7_All	7.21	6.94	6.54	10.51	10.59	11.8
CL10809.Contig1_All	1.75	1.83	2.42	3.31	2.75	3.17
CL10809.Contig2_All	4.59	3.9	4.33	5.52	6.7	6.22
CL1081.Contig10_All	2.34	2.48	2.11	1.96	1.94	1.63
CL1081.Contig11_All	1.99	2.16	2.43	0.91	0.7	0.78
CL1081.Contig12_All	2.01	2.99	2.52	1.97	2.25	1.75
CL1081.Contig13_All	4.33	4.6	5.36	3.73	3.9	3.78
CL1081.Contig1_All	1.58	1.3	1.16	3.95	4.69	4.51
CL1081.Contig2_All	5.41	5.92	6.64	4.97	4.99	4.05
CL1081.Contig4_All	4.39	5.2	5.91	4.42	3.5	4.77
CL1081.Contig6_All	11.51	10.19	10.81	18.88	20.04	19.44
CL1081.Contig7_All	2.65	2.57	2.47	0.98	0.74	1.31
CL10810.Contig1_All	1.68	1.99	1.44	0.42	0.57	0.59
CL10812.Contig1_All	18.81	23.38	20.22	17.03	15.7	16.77
CL10812.Contig3_All	25.96	22.65	25.54	31.31	33.69	31.72
CL10813.Contig2_All	14.28	13.55	14.74	7.76	7.49	7.21
CL10814.Contig3_All	1.62	1.64	1.88	4.21	2.87	2.66
CL10815.Contig3_All	5.2	6.23	5.83	9.76	11.15	10.39
CL10816.Contig3_All	4.9	4.28	3.91	1.18	0.97	0.88
CL10816.Contig5_All	0.27	0.33	0.21	0.6	0.48	0.57
CL10817.Contig3_All	2.85	4.26	3.15	7.21	7.97	7.78
CL10817.Contig5_All	0.57	0.77	0.87	3.07	3.74	3.25
CL10817.Contig6_All	2.04	1.63	2.41	3.97	4.73	5.83
CL10817.Contig7_All	15.02	16.04	15.99	12.11	11.85	11.55
CL10818.Contig1_All	2.13	0.41	1.2	0	0	0
CL10818.Contig2_All	0.6	0.84	0.94	0.11	0.28	0
CL10818.Contig3_All	4.48	4.91	6.19	3.33	3.97	2.94
CL1082.Contig5_All	1.32	0.84	1.04	4.59	4.12	4.3
CL10822.Contig1_All	0.63	0	0.11	1.33	1.43	1.43
CL10823.Contig1_All	161.35	158.12	146.29	104.16	103.06	108.39
CL10823.Contig2_All	45.2	43.12	46.66	36.48	37.07	36.62
CL10823.Contig3_All	147.16	156.41	148.67	126.8	133.09	127.35
CL10824.Contig10_All	4.32	6.3	5.95	0	0.14	0
CL10824.Contig12_All	0.84	1.49	0.61	0.11	0.2	0.21
CL10824.Contig13_All	6.92	6.1	9.46	3.47	3.81	2.25
CL10824.Contig14_All	0.62	1	0.51	0.04	0.06	0
CL10824.Contig16_All	2.64	2.37	2.47	0.3	0	0.16
CL10824.Contig1_All	2.52	3.21	1.9	0.76	0.45	0
CL10824.Contig2_All	8.84	10.19	6.95	1.47	0.95	0.76
CL10824.Contig3_All	1.6	1.78	1.54	0.13	0.26	0.24
CL10824.Contig4_All	3.42	3.64	3.03	0.16	0.31	0.15
CL10824.Contig7_All	10.61	9.92	8.08	5.02	6.11	5.51
CL10825.Contig3_All	10.12	10.68	8.64	1.34	2.08	1.98
CL10825.Contig4_All	1.35	1.24	1.34	0.11	0.1	0.11
CL10825.Contig5_All	0.54	0.61	0.97	1.66	1.84	1.5
CL10827.Contig2_All	5.19	5.15	6.31	2.66	1.94	1.87
CL10827.Contig3_All	0.99	1.11	1.07	0.15	0.14	0.64
CL10827.Contig5_All	1.42	1.25	1.28	0.39	0.13	0.17
CL10828.Contig1_All	4.18	4.45	5.88	9.62	11.13	10.08
CL10828.Contig2_All	23.32	21.41	21.2	37.01	37.41	36.67
CL10828.Contig3_All	17.76	18.91	20.89	27.08	28.91	26.73
CL10828.Contig4_All	19.17	22.03	18.97	15.42	16.93	15.48
CL1083.Contig10_All	7.99	9.27	9.39	8.06	7.8	7.5
CL1083.Contig1_All	0.5	0.84	0.61	0	0	0
CL1083.Contig3_All	1.96	1.69	2.12	0.74	0.99	0.84
CL1083.Contig4_All	3.43	2.91	3.26	2.68	2.27	1.86
CL1083.Contig6_All	1.37	1.24	1.21	3.77	3.19	3.41
CL1083.Contig7_All	4.05	4.14	5.28	11.19	11.5	12.52
CL1083.Contig8_All	2.82	2.81	2.76	1.8	2.34	2.5
CL10830.Contig2_All	5.88	6.27	5.9	5.07	4.4	4.69
CL10831.Contig1_All	2.56	2.62	2.44	0.25	0.41	0.49
CL10832.Contig2_All	2.32	1.52	2.31	5.45	5.35	6.61
CL10833.Contig1_All	1.37	1.56	1.16	4.31	3.73	3.6
CL10835.Contig1_All	67.91	67.99	67.63	104.79	108.34	107.43
CL10835.Contig2_All	16.4	18.15	18.2	48.95	46.59	45.39
CL10835.Contig3_All	12.4	16.12	15.35	68.84	70.43	64.88
CL10835.Contig4_All	17.28	16.34	15.06	29.21	27.52	28.26
CL10835.Contig5_All	11.48	11.83	10.24	10.37	8.96	10.11
CL10836.Contig1_All	1.4	1.11	1.41	5.19	3.96	4.68
CL10836.Contig2_All	0.98	0.78	0.24	1.98	1.95	1.41
CL10837.Contig2_All	4.75	4.23	5.16	12.3	13.34	11.32
CL10839.Contig1_All	19.22	18.81	20.93	25.99	27.48	30.07
CL10839.Contig2_All	5.14	5.86	5.86	9.08	9.46	8.44
CL1084.Contig1_All	1.33	1.9	1.21	5.02	5.27	4.65
CL1084.Contig4_All	20.22	20.88	20.35	17.34	16.92	17.3
CL10840.Contig2_All	0.04	0	0	5.39	5.3	4.49
CL10840.Contig3_All	0	0	0	0.21	0.08	0.13
CL10841.Contig1_All	0.38	0.13	0.39	1.84	3.19	1.44
CL10843.Contig1_All	0.17	1.07	0.54	2.53	2.58	3.39
CL10844.Contig4_All	1.74	2.67	2.4	3.56	3.79	4
CL10844.Contig5_All	2.39	1.84	1.95	4.45	3.59	4.56
CL10845.Contig2_All	7.61	7.73	5.56	5.23	4.34	5.02
CL10845.Contig3_All	13.08	14.81	13.75	22.79	21.87	20.46
CL10847.Contig1_All	2.63	3.69	3.86	0	0	0
CL10848.Contig2_All	1.38	1.06	1.78	0.33	0.69	0.56
CL10848.Contig5_All	1.32	1.92	2.45	4.27	4.77	4.53
CL1085.Contig2_All	0	0	0	1.04	0.33	0.23
CL1085.Contig4_All	1.25	0.72	0.8	2.91	2.86	3.82
CL1085.Contig5_All	0.17	0.37	0.37	0.9	0.83	0.52
CL1085.Contig6_All	0.08	0.09	0.11	0.65	0.82	0.67
CL1085.Contig8_All	0.34	0.25	0.2	1.86	1.47	1.23
CL10851.Contig1_All	1.2	0.69	0.85	2.34	1.56	2.18
CL10853.Contig1_All	0.29	0.83	0.6	0	0	0.06
CL10854.Contig2_All	0.1	0	0	4.32	3.97	5.98
CL10855.Contig6_All	2.72	1.62	1.73	1.28	0.81	0.53
CL10857.Contig3_All	1.64	1.79	1.46	3.4	3.05	3.15
CL10859.Contig3_All	2.93	2.24	2.15	6.39	5.41	3.55
CL1086.Contig1_All	4.15	4.56	4.78	17.31	15.31	14.46
CL1086.Contig2_All	3.69	3.3	3.45	1.28	1.47	1.76
CL1086.Contig3_All	8.4	10.07	8.69	6.05	6.76	7.28
CL1086.Contig6_All	1.87	1.85	2.58	0.57	0.63	1.2
CL10860.Contig2_All	1.87	2.66	2.59	1.17	1.65	1.11
CL10860.Contig5_All	1.19	1.1	0.85	3.04	2.48	2.03
CL10861.Contig3_All	3.72	3.23	4.16	2.77	3.02	2.9
CL10861.Contig4_All	11.17	11.06	10.29	18.17	16.03	16.17
CL10862.Contig1_All	13.45	11.43	12.57	55.34	55.26	53.91
CL10862.Contig2_All	45.84	46.41	51.55	86.17	88.81	86.36
CL10864.Contig2_All	1.66	1.82	1.42	3.13	4.91	3.38
CL10864.Contig3_All	12.24	12.56	13.34	7.45	8.32	8.28
CL10866.Contig2_All	2.36	3.24	2.4	1.03	1.12	0.96
CL10866.Contig3_All	12.48	11.48	12.23	8.77	7.04	8.1
CL10867.Contig1_All	65.96	64.82	69.46	83.75	86.23	81.91
CL10867.Contig2_All	25.45	21.9	21.31	35.91	31.9	34.34
CL10867.Contig3_All	9.97	9.28	10.24	23.27	22.47	24.29
CL10867.Contig4_All	121.67	124.09	121.99	174.27	172.91	174.14
CL10867.Contig5_All	0.53	0.11	0.23	19.29	18.15	16.68
CL10868.Contig2_All	0.91	0.93	0.83	2.43	2.94	3.31
CL10869.Contig1_All	0.14	1.04	0.68	2.75	2.41	1.97
CL10869.Contig3_All	0.32	0	0	1.15	0.86	0.83
CL10869.Contig4_All	0.16	0.18	0	0.55	0.93	0.49
CL10870.Contig1_All	0.29	0.52	1.13	0	0.11	0
CL10870.Contig2_All	32.7	33.98	35.35	24.17	28.19	30.39
CL10870.Contig3_All	28.2	28.73	31.85	41.04	44.24	37.35
CL10870.Contig7_All	2.76	2.18	2.59	0.98	0.65	0.37
CL10871.Contig1_All	0	0	0	3.12	0.7	2.07
CL10871.Contig2_All	0.51	0.35	0.18	4.23	3.05	2.44
CL10874.Contig2_All	0.31	0.7	0.72	2.52	2.78	1.67
CL10875.Contig1_All	3.34	2.48	2.79	0	0.12	0
CL10877.Contig1_All	8.87	6.2	6.47	10.54	14.1	11.89
CL10878.Contig6_All	59.36	59.52	52.04	47.72	45.74	47.45
CL10879.Contig1_All	0.65	1.02	0.81	3.07	2.61	3.09
CL10879.Contig3_All	1.68	1.18	1.65	0.22	0	0
CL1088.Contig3_All	38.97	37.7	43.58	55.15	55.36	51
CL10880.Contig2_All	3.14	2.06	2.68	1.23	1.24	1.82
CL10882.Contig1_All	2.65	2.92	2.38	1.39	0.58	0.66
CL10882.Contig3_All	0.82	0.69	0.9	2.49	1.53	2.98
CL10884.Contig1_All	0.6	1.02	0.73	0	0	0
CL10885.Contig1_All	1.54	1.51	0.64	0.54	0.62	0.3
CL10885.Contig3_All	19.35	20.44	19.09	29.39	28.86	28.33
CL10885.Contig4_All	4.95	4.1	2.83	5.88	7.52	6.44
CL10885.Contig5_All	14.32	16.71	17.73	20.97	25.12	24.21
CL10885.Contig6_All	1.74	1.77	1.71	0	0	0
CL10886.Contig1_All	0.6	0.84	0.93	0	0	0
CL10887.Contig2_All	0.95	0.89	1.23	4.13	4.12	4
CL10888.Contig1_All	0	0.3	0.93	0	0	0
CL10889.Contig6_All	3.07	3.8	3.11	5.87	6.31	7.14
CL1089.Contig2_All	1.6	1.14	1.36	3.96	4.54	3.68
CL1089.Contig3_All	2.72	2.4	2.43	1.38	1.85	1.74
CL10890.Contig2_All	7.54	8.86	9.61	6.61	7.39	6.61
CL10891.Contig1_All	41.09	40.79	43.11	62.09	59.19	56.6
CL10891.Contig2_All	13.67	15.85	14.66	11.92	11.74	11.75
CL10893.Contig1_All	3.92	3.92	3.64	0.14	0	0.42
CL10893.Contig2_All	5.83	4.92	6.7	0.6	0.36	0.48
CL10895.Contig3_All	28.59	32.31	31.52	28.76	29.46	30.47
CL10896.Contig1_All	3.47	3.39	4.2	2.73	2.38	1.76
CL10897.Contig2_All	0.91	0.86	1.41	0.22	0	0.17
CL10899.Contig1_All	9.19	10.57	10.82	16.45	14.83	15.83
CL109.Contig10_All	0.04	0.12	0.17	1.04	0.65	1.44
CL109.Contig11_All	0.18	0.15	0.14	7.44	6.92	6.7
CL109.Contig12_All	1.16	0.95	1.27	3.19	3.2	2.8
CL109.Contig15_All	0.31	0.38	0.41	12.19	10.36	11.05
CL109.Contig1_All	12.55	12.25	12.72	8.06	7.25	7.66
CL109.Contig2_All	0	0	0	1.25	1.05	0.82
CL109.Contig4_All	0	0.26	0.09	5.95	4.18	4.06
CL109.Contig5_All	0	0	0	3.78	3.33	3.27
CL109.Contig6_All	0	0	0	0.72	1.05	1.66
CL109.Contig8_All	0.19	0.58	0.22	1.17	1.11	1.45
CL109.Contig9_All	2.86	2.64	3.88	5.31	5.38	5.36
CL1090.Contig4_All	0.84	1.32	0.5	0	0	0
CL1090.Contig5_All	2.01	2.51	1.49	0.39	0.62	0.33
CL10900.Contig1_All	18.63	17.08	18.15	13.5	14.07	13.4
CL10901.Contig1_All	0.66	0.65	1.17	0.54	0.24	0.37
CL10902.Contig1_All	2.74	2	1.1	0.24	0.33	0.42
CL10904.Contig1_All	1	1.78	2.16	0	0.36	0
CL10906.Contig1_All	4.08	3.85	3.3	1.71	1.54	1.09
CL10906.Contig2_All	3.88	4.48	4.51	6.8	6.97	8.18
CL10907.Contig2_All	2.84	3	3.46	2.12	1.67	1.56
CL10907.Contig3_All	1.5	1.54	1.03	4.46	5.03	5.78
CL10908.Contig5_All	4.35	4.58	4.75	6.19	7.58	5.89
CL10909.Contig2_All	2.52	1.73	1.19	4.82	5.96	5.89
CL10909.Contig3_All	0	0	0.13	1.38	1.51	1.46
CL10909.Contig4_All	1.05	2.05	1.44	0	0	0
CL1091.Contig1_All	2.66	3.72	3.34	0.49	1.7	0.87
CL1091.Contig4_All	2.1	2.18	2.49	3.83	5.25	4.61
CL10910.Contig2_All	2.95	2.89	2.65	1.17	1.39	1.23
CL10913.Contig1_All	1.1	0.79	0.96	3.62	4.63	3.95
CL10914.Contig2_All	1.33	1.29	0.97	0.34	0.58	0.21
CL10914.Contig3_All	8.37	8.94	7.8	6.24	6.21	6.22
CL10914.Contig5_All	1.76	1.5	1.27	0.69	0.66	0.41
CL10914.Contig8_All	0.58	0.38	0.29	4.22	3.13	4.17
CL10916.Contig1_All	90.08	95.31	92.85	7.49	5.1	6.53
CL10917.Contig10_All	5.46	5.24	5.49	0.66	0.94	0.66
CL10917.Contig1_All	0	0.02	0	0.82	0.84	0.91
CL10917.Contig2_All	0.06	0.17	0.09	0.75	0.95	1.17
CL10917.Contig3_All	1.56	2.4	1.92	4.02	4.29	4.57
CL10917.Contig4_All	0.32	0.42	0.16	1.24	1.62	1.42
CL10917.Contig6_All	1.59	1.34	1.11	0.86	0.67	0.94
CL10917.Contig7_All	1.76	1.72	1.48	4.5	4.89	4.22
CL10917.Contig8_All	1.41	1.18	1.2	4.39	4.57	4.58
CL1092.Contig1_All	6.33	6.49	8.08	11.39	11.99	10.93
CL1092.Contig2_All	0.9	0.56	0.67	2.14	1.43	1.87
CL10920.Contig1_All	11.5	11.02	9.86	15.64	14.81	15.74
CL10920.Contig2_All	3.99	3.97	4.27	2.77	2.28	2.53
CL10921.Contig2_All	24.25	25.43	20.76	35.43	33.8	33.16
CL10922.Contig11_All	0.1	0	0.17	1.88	1.91	0.92
CL10922.Contig12_All	0.07	0.23	0.27	1.2	1.25	1.01
CL10922.Contig1_All	13.42	12.53	14.5	9.59	8.47	12.18
CL10922.Contig3_All	15.13	16.52	15.42	24.16	27.99	24.85
CL10922.Contig4_All	2.29	1.04	1.85	0.41	0.84	0.3
CL10922.Contig5_All	7.96	8.52	7.88	5.73	5.94	5.14
CL10924.Contig3_All	4.03	4.09	3.38	7.37	6.18	6.06
CL10925.Contig3_All	1.03	0.98	1.16	3.04	2.63	2.98
CL10927.Contig1_All	2.49	2.73	3.39	5.71	7.79	6.52
CL10927.Contig2_All	4.11	4.1	5.18	3.28	1.98	3.58
CL10928.Contig5_All	2.78	2.69	1.81	15.56	20.56	16.31
CL10929.Contig1_All	2.86	2.57	2.93	1.77	2.01	1.86
CL10929.Contig4_All	5.92	6.19	6.48	4.87	4.54	4.13
CL1093.Contig5_All	13.55	15.02	15.17	21.75	22.67	22.41
CL1093.Contig7_All	8.04	10.01	10.02	22.43	21.46	21.45
CL10932.Contig2_All	15.81	16.13	19.52	12.65	11.99	9.26
CL10934.Contig10_All	23.02	21.86	22.37	7.53	4.71	6.43
CL10934.Contig1_All	2.71	1.65	1.57	0.16	0.28	0
CL10934.Contig4_All	0.18	0.42	0.25	1.89	1.88	1.47
CL10934.Contig6_All	0	0	0	18.12	21.86	21.04
CL10934.Contig8_All	13.52	14.54	14.61	8.97	10.96	9.94
CL10934.Contig9_All	0.24	0	0.46	7.26	4.01	4.41
CL10935.Contig1_All	4.78	4.45	3.63	6.69	7.31	7.68
CL10935.Contig3_All	9.34	9.33	8.88	14.37	17.07	13.15
CL10936.Contig2_All	1.46	1.33	1.29	3.21	3.46	2.17
CL10937.Contig1_All	0.41	1.11	0.84	0	0	0.04
CL10937.Contig2_All	4.58	4.54	4.62	1.88	1.92	1.92
CL10937.Contig3_All	2.98	2.03	1.99	0.22	0.19	0.07
CL1094.Contig1_All	1.66	2.21	2.48	6.02	5.53	6.35
CL1094.Contig3_All	6.27	4.15	4.79	4.42	4.43	4.24
CL1094.Contig4_All	0.67	0.82	0.54	0.01	0.09	0
CL1094.Contig5_All	1.82	2.08	1.8	0.02	0.07	0
CL1094.Contig6_All	1.87	1.95	2.38	0.59	0.46	0.79
CL1094.Contig8_All	23.37	25.38	24.45	16.82	19.04	18.14
CL1094.Contig9_All	11.95	13.09	11.15	16.58	18.25	17.21
CL10943.Contig3_All	2.3	3.06	2.89	0.37	1.08	1.19
CL10943.Contig5_All	7.25	6.39	7.38	6.71	5.84	5.16
CL10944.Contig1_All	14.37	15.67	13.81	24.44	22.9	26.91
CL10944.Contig3_All	4.14	4.41	3.71	0.78	0.71	0.85
CL10944.Contig4_All	8.44	10.96	10.29	6.34	6.45	5.94
CL10947.Contig2_All	0.88	0.56	1.2	2.1	2.29	2.98
CL10947.Contig3_All	0.79	0.72	1.48	2.7	2.72	2.32
CL10949.Contig1_All	1.98	2.5	1.76	0.61	0.52	0
CL10949.Contig2_All	10.23	10.9	10.31	5.85	6.1	5.85
CL10949.Contig3_All	0.03	0.03	0	8.74	8.3	7.12
CL10949.Contig4_All	1.93	1.78	1.97	4.02	3.14	3.44
CL1095.Contig1_All	11.01	10.46	11.87	24.7	27.31	22.73
CL1095.Contig2_All	4.99	5.49	3.7	29.06	30.47	32.38
CL1095.Contig3_All	28.78	25.22	29.35	17.39	19.1	18.33
CL1095.Contig4_All	2.92	3.07	4.43	11.92	8.87	12.75
CL10950.Contig1_All	0.26	0.35	1.02	1.95	2.42	2.36
CL10950.Contig2_All	4.29	3.89	4.74	6.99	6.2	6.9
CL10951.Contig2_All	0.45	0.37	0.54	1.06	1.39	0.86
CL10951.Contig3_All	6.2	5.74	6.41	5.11	5.64	5.25
CL10951.Contig5_All	4.52	4.12	4.15	2.99	3.22	2.82
CL10952.Contig1_All	5.45	5.78	4.96	0	0	0
CL10953.Contig1_All	4.14	4.56	3.61	1.79	1.9	1.83
CL10953.Contig2_All	0.79	0.66	1.27	2.88	2.52	2.29
CL10953.Contig3_All	1.53	1.89	1.81	4.63	4.61	5.45
CL10954.Contig1_All	1.38	1.04	1.25	4.57	3.32	4.42
CL10954.Contig2_All	5.92	9.41	8.75	1.93	1.87	2.2
CL10954.Contig3_All	6.77	4.26	5.15	13.85	14.85	12.73
CL10955.Contig3_All	3.25	2.9	3.92	1.25	1.8	2.26
CL10955.Contig4_All	8.44	9.25	10.84	2.27	2.78	2.78
CL10956.Contig1_All	1.43	1.89	1.49	5.56	7.15	6.96
CL10956.Contig3_All	7.99	7.42	6.12	3.61	3.21	2.58
CL10957.Contig1_All	3.21	2.45	2.13	1.32	1.01	1.03
CL10957.Contig2_All	2.18	2.71	2.22	0.95	0.96	1.08
CL10958.Contig5_All	30.4	31.39	28.9	24.04	26.4	27.26
CL10958.Contig6_All	0.49	0.8	0.67	2.39	2.15	1.87
CL1096.Contig4_All	0.92	0.84	0.95	0.14	0.1	0.28
CL10960.Contig1_All	0.4	0.73	0.4	0.16	0.08	0
CL10961.Contig1_All	3.52	4.81	5.2	7.48	8.24	6.83
CL10964.Contig1_All	6.85	9.04	6.27	11.29	11.52	14.07
CL10965.Contig2_All	12.59	12.53	11.71	25.97	22.39	23.27
CL10965.Contig3_All	3.98	2.43	3	0	0	0
CL10965.Contig6_All	0.96	1.84	3.56	0.41	0	0.73
CL10966.Contig1_All	37.56	37.09	36.02	18.81	15.38	15.19
CL10966.Contig2_All	8.53	7.76	7.96	33.83	37.86	36.64
CL10968.Contig1_All	0.73	0.53	0.9	3.14	3.27	2.9
CL10968.Contig3_All	7.96	9.59	9.01	8.59	8.27	5.79
CL10968.Contig5_All	10.76	11.61	11.62	42.08	42.52	43.62
CL10968.Contig7_All	2.3	3.24	2.36	1.98	1.68	1.78
CL10968.Contig8_All	2.61	3.32	3.1	4.52	4.79	5.14
CL1097.Contig3_All	10.22	9.5	9.79	9.48	7.53	7.84
CL1097.Contig4_All	4.47	6.21	6.12	9.39	9.45	9.69
CL1097.Contig5_All	15.23	18.09	14.02	22.27	23.04	21.49
CL10970.Contig1_All	0.69	0.53	0.74	23.1	25.35	24.35
CL10970.Contig2_All	5.83	7.98	5.69	20.37	16.35	15.76
CL10971.Contig1_All	370.12	389.87	374.61	214.94	213.61	201.39
CL10971.Contig2_All	106.86	109.2	113.53	48.8	45.27	45.4
CL10971.Contig3_All	37.89	31.97	32	16.89	17.69	16.36
CL10971.Contig4_All	661.29	687.81	694.57	615.62	614.92	600.71
CL10971.Contig5_All	116.13	114.31	116.38	191.3	201.47	186.52
CL10972.Contig1_All	0.49	0.88	0.75	1.78	2.28	1.99
CL10972.Contig2_All	0.75	1.48	0.83	2.46	2.43	2.4
CL10975.Contig1_All	3.31	3	3.09	1.51	1.83	1.22
CL10976.Contig3_All	35.6	33.68	35.44	17.23	17.21	18.05
CL10976.Contig7_All	72.88	71.38	75.5	25.91	30.35	28.77
CL10977.Contig1_All	142.04	145.04	147.45	133.78	131.92	127.78
CL10977.Contig2_All	202.76	207.17	209.21	68.26	65.39	61.08
CL10978.Contig1_All	0.24	0.96	0.39	2.6	1	1.41
CL10978.Contig2_All	0	0	0	2.1	1.42	0.69
CL1098.Contig1_All	4.47	5.02	3.58	7.85	8.95	8.38
CL1098.Contig7_All	12.77	13.29	12.92	22.43	23.2	20.17
CL10980.Contig1_All	0	0	0	2.24	3.78	2.22
CL10980.Contig2_All	0.92	1.21	1.95	0.24	0	0.24
CL10981.Contig1_All	3.75	4.14	4.18	8.85	8.77	8.49
CL10981.Contig2_All	0	0	0	1.76	0.14	2.07
CL10981.Contig3_All	4.58	4.34	4.14	3.12	2.7	2.58
CL10982.Contig2_All	15.16	14.86	14.67	0	0	0
CL10982.Contig3_All	3.14	2.72	2.69	8.39	8.74	9.65
CL10982.Contig4_All	2.26	1.23	2.73	6.61	6.31	6.18
CL10983.Contig1_All	23.28	23.01	22.53	3.9	3.87	3.8
CL10983.Contig3_All	21.89	20.03	22.07	14.85	14.85	14.53
CL10983.Contig4_All	20.17	21.14	20.04	36.53	38.86	39.66
CL10983.Contig5_All	15.97	18.73	17.27	16.63	15.3	17.27
CL10985.Contig1_All	0.22	0.67	0.45	3.03	2.27	2.57
CL10986.Contig2_All	35.9	32.52	34.14	3.55	5.48	3.63
CL10989.Contig1_All	8.27	8.04	7.78	11.56	10.99	10.79
CL10989.Contig2_All	0.71	0.92	0.8	0.27	0.4	0.22
CL10989.Contig3_All	17.16	15.6	17.28	15.48	16.51	16.12
CL1099.Contig1_All	0.52	0.83	0.6	0	0.11	0
CL10990.Contig1_All	0	0	0	1.8	1.43	1.59
CL10990.Contig4_All	4.32	5.51	3.87	3.4	3.01	3.64
CL10991.Contig1_All	0	0	0.08	2.03	1.69	1.2
CL10992.Contig1_All	138.78	143.78	140.72	183.53	192.13	183.05
CL10992.Contig2_All	83.61	90.07	90.15	80.83	85.59	82.45
CL10992.Contig3_All	91.28	98.21	90.03	149.42	153.3	145.98
CL10992.Contig4_All	121.19	128.54	131.97	154.72	161.91	156.5
CL10993.Contig1_All	10.94	11.91	10.8	8.22	6.8	7.45
CL10993.Contig2_All	0.38	0.36	0.29	1.05	1.2	1.1
CL10993.Contig4_All	2.16	2.3	2.4	11.25	13.58	10.96
CL10995.Contig2_All	0.45	0.81	0.49	1.81	1.34	2.33
CL10995.Contig3_All	3.27	3.19	3.83	2.41	3.32	2.78
CL10995.Contig6_All	7.35	7.82	7.57	5.55	6.26	6.16
CL10998.Contig4_All	20.95	19.28	19.77	29.51	31.6	28.72
CL11.Contig11_All	2.59	2	2.02	0.1	0.43	0.38
CL11.Contig12_All	0.49	0.98	0.75	0.25	0.09	0.2
CL11.Contig13_All	3.2	3.71	4.13	1.51	1.97	0.57
CL11.Contig15_All	13.45	16.07	11.85	1.6	1.57	2.01
CL11.Contig16_All	8.96	5.88	7.31	1.33	0	1.42
CL11.Contig17_All	71.85	63.68	68.48	9.59	7.58	8.26
CL11.Contig18_All	1.81	1.57	1.61	6.68	5.76	6.72
CL11.Contig19_All	3.07	2.58	3.38	0.08	0.1	0
CL11.Contig1_All	0.9	0.81	0.87	2.7	2.47	2.02
CL11.Contig20_All	21.8	22.21	24.12	13.44	12.57	12.79
CL11.Contig21_All	203.68	197.01	211.62	108.82	109.6	120.26
CL11.Contig22_All	145.06	138.2	153.21	11.78	11.77	10.89
CL11.Contig23_All	4.72	5.71	5.93	15.8	13	13.16
CL11.Contig3_All	1.25	1.08	0.88	0.47	0.34	0.46
CL11.Contig4_All	19.22	18.83	20.65	13.01	11.7	11.52
CL11.Contig5_All	0.51	0.42	0.25	1.68	1.48	2.24
CL11.Contig8_All	2.04	3.67	1.67	5.31	6.02	4.61
CL110.Contig2_All	0.46	0.26	0.63	0.31	0.16	0
CL1100.Contig10_All	0.44	0.94	0.86	2.37	2.77	2.05
CL1100.Contig12_All	4	4.69	4.76	1.99	0.77	2.46
CL1100.Contig16_All	2.96	2.66	2.45	7.53	7.92	7.86
CL1100.Contig2_All	3.56	2.16	3.43	1.05	0.7	0.67
CL1100.Contig5_All	0.6	0.73	0.72	0.38	0.2	0.24
CL1100.Contig9_All	1.5	1.46	0.83	2.97	2.98	2.85
CL11000.Contig1_All	30.54	27.91	26.38	25.38	24.93	29.86
CL11000.Contig2_All	8.26	11.04	7.79	0	0	0
CL11000.Contig3_All	122.15	122.34	124.46	175.75	176.49	176.07
CL11000.Contig5_All	2.59	3.31	3	5.25	5.08	5.58
CL11002.Contig1_All	0.8	1.24	0.82	0	0	0
CL11002.Contig2_All	2.41	3.46	2.95	0.29	0.6	0
CL11004.Contig1_All	1.9	1.72	2.1	0	0.12	0
CL11004.Contig3_All	4	3.89	3.65	1.91	0.98	1.46
CL11004.Contig6_All	0.67	1.15	0.72	2.05	2.81	3.56
CL11005.Contig1_All	4.11	4.61	4.3	4.04	4.11	4.27
CL11005.Contig2_All	0	0.04	0.13	0.64	0.62	0.57
CL11006.Contig1_All	2.89	2.64	3.16	1	0.96	1.42
CL11006.Contig2_All	5.61	7.06	6.41	2.41	0.82	1.73
CL11006.Contig3_All	13.72	13.4	14.61	6.94	6.2	5.85
CL1101.Contig2_All	2.63	3.25	3.06	1.47	1.53	0.83
CL11010.Contig2_All	1.44	1.62	1.3	2.72	2.88	3.14
CL11010.Contig3_All	3.64	3.27	3.54	2.56	2.97	2.81
CL11010.Contig6_All	2.17	2.95	3.19	4.43	4.67	4.19
CL11010.Contig7_All	1.6	1.5	1.79	4.44	4.69	4.57
CL11014.Contig1_All	3.19	2.01	2.34	1.53	1.19	0.83
CL11014.Contig2_All	4.98	4.68	4.99	1.45	1.61	1.2
CL11015.Contig2_All	0.3	0.21	0.16	1.46	1.69	1.13
CL11015.Contig3_All	0.31	0.39	0.33	0	0.11	0.07
CL11016.Contig3_All	1.25	2	2.5	11.39	10.48	9.18
CL11018.Contig1_All	1	1.02	1.25	0.19	0.13	0.48
CL11018.Contig2_All	2.88	2.96	3.04	1.67	1.05	1.27
CL11020.Contig1_All	2.4	2.99	1.89	1.09	0.88	0.66
CL11020.Contig2_All	2.38	2.43	2.55	17.56	16.11	16.72
CL11020.Contig3_All	8.53	7.97	8.17	5.61	4.03	3.68
CL11020.Contig5_All	13.11	16.78	15.64	13.69	13.29	13.8
CL11021.Contig1_All	2.18	2.74	2.37	0.84	0.65	1.07
CL11021.Contig2_All	3.29	3.77	3	7.26	7.08	7.06
CL11023.Contig1_All	4.48	4.88	4.72	6.26	6.32	6.28
CL11023.Contig2_All	7.05	7.14	6.99	10.71	11.08	10.46
CL11023.Contig3_All	8.62	9	8.9	12.4	11.58	12.02
CL11024.Contig3_All	4.65	5.81	6.26	1.4	2.07	1.33
CL11024.Contig4_All	1.59	0.9	1.2	5.26	3.01	4.11
CL11025.Contig1_All	1.03	0.75	0.76	0	0	0
CL11026.Contig2_All	11.57	9.14	9.64	25.07	21.27	20.41
CL11026.Contig3_All	5.03	4.3	4	2.81	2.59	2.72
CL11026.Contig5_All	5.67	5.65	6.32	1.91	2.1	1.57
CL11028.Contig2_All	4.07	3.73	3.93	10.29	9.57	9.16
CL11029.Contig4_All	3.56	4.98	4.44	7.67	9.16	8.3
CL11029.Contig5_All	6.63	4.78	7	2.82	4.35	2.52
CL1103.Contig2_All	2.07	2.53	2.25	4.44	3.68	4.24
CL11030.Contig1_All	3.35	2.91	3.01	0.57	0.99	0.66
CL11031.Contig2_All	7.92	9.61	8.18	14.72	12.29	11.71
CL11034.Contig1_All	0.76	0.94	1.03	2.16	1.82	2.19
CL11035.Contig1_All	1.67	1.21	1.38	0.65	0.76	0.58
CL11035.Contig2_All	12.93	14.53	13.75	1.82	1.45	1.55
CL11035.Contig3_All	7.45	8.5	10.22	7.42	8.19	6.97
CL11036.Contig1_All	8.47	9.37	8.38	13.93	14.71	13.8
CL11036.Contig2_All	0	0	0	2.6	1.86	2.19
CL11037.Contig1_All	0.23	0.09	0.42	0	0	0
CL11037.Contig2_All	0.48	0.32	0.25	0.73	0.64	0.72
CL11039.Contig4_All	5.3	5.82	3.79	9.15	8.99	9.93
CL1104.Contig2_All	1.61	1.45	1.96	3.74	4.11	3.65
CL1104.Contig4_All	2.29	2.21	1.48	0.25	0.39	0.38
CL1104.Contig5_All	6.32	6.59	6.1	9.48	10.13	9.89
CL1104.Contig6_All	4.01	2.69	3.15	12.03	11.17	12.07
CL11040.Contig1_All	14.19	17.54	14.16	39.2	39.84	41
CL11040.Contig2_All	33.56	36.62	38.32	35.46	36.89	34.82
CL11040.Contig4_All	12.55	11.79	13.26	1.33	1.71	1.63
CL11041.Contig2_All	1.41	1.37	1.2	3.98	3.5	3.6
CL11041.Contig3_All	0.59	0.99	0.93	2.88	3.04	3.36
CL11042.Contig2_All	0.27	0.56	0.56	2.54	1.72	1.49
CL11043.Contig2_All	2.75	2.58	2.49	12.05	11.49	11.35
CL11046.Contig2_All	3.19	2.62	3.07	2.02	2.01	1.97
CL11046.Contig3_All	2.35	3.16	1.82	1.45	1.36	1.41
CL11049.Contig1_All	4.61	4.1	3.56	6.87	5.76	7.38
CL11049.Contig2_All	2.1	2.38	1.62	5.27	4.88	4.81
CL1105.Contig2_All	0.55	0.45	0.78	2.36	1.64	1.69
CL11051.Contig1_All	0	0	0	3.42	3.38	3.88
CL11053.Contig1_All	11.63	12.47	12.73	8.24	8.65	8.33
CL11056.Contig1_All	8.64	10.4	8.95	0.3	0.36	0.49
CL11056.Contig5_All	6.29	7.22	6.5	8.8	10	9.68
CL11056.Contig6_All	4.59	4.66	6.06	2.59	1.18	1.8
CL11056.Contig7_All	0.6	0	0.4	1	1.7	1.41
CL11057.Contig1_All	49.56	53.92	54.08	6.58	7.84	8.9
CL11057.Contig4_All	19.76	21.52	20.21	18.32	16.83	18.87
CL11058.Contig2_All	1.95	1.28	2.35	0.64	0.74	0.71
CL11058.Contig5_All	1.89	2	1.51	3	3.02	2.77
CL11059.Contig2_All	2.7	3.09	3.12	0.88	1.22	1.46
CL1106.Contig10_All	0.38	0	0	2.4	1.56	1.39
CL1106.Contig1_All	14.14	14.2	16.68	36.93	38.17	43.77
CL1106.Contig4_All	2.95	3.41	2.58	8.62	8.7	8.44
CL1106.Contig5_All	1.04	0.37	0.86	3.16	2.54	3.13
CL1106.Contig6_All	7.76	7.38	6.29	22.18	21.04	18.55
CL1106.Contig7_All	1.33	1.68	0.82	3.27	4.57	4.45
CL1106.Contig8_All	0.94	1.07	0.5	3.27	2.79	2.4
CL1106.Contig9_All	13.74	13.04	11.57	31.76	28.85	29.71
CL11060.Contig10_All	0.91	0.99	0.73	0.45	0.55	0.36
CL11060.Contig11_All	2.03	1.94	1.75	0.19	0.54	0.11
CL11060.Contig13_All	0.72	0.87	0.58	0.13	0.1	0.17
CL11060.Contig15_All	0.25	0.15	0.35	0	0.05	0
CL11060.Contig16_All	1.73	1.88	1.65	0.43	0.5	0.31
CL11060.Contig1_All	0.93	1.39	1.37	0.37	0.1	0.53
CL11060.Contig20_All	10.6	10.77	12.65	10.41	9.67	11.03
CL11060.Contig21_All	38.97	39.88	36.76	41.52	39.29	35.5
CL11060.Contig3_All	0	0	0	1.99	1.56	2.97
CL11060.Contig7_All	1.3	1.31	1.39	0.71	0.65	0.78
CL11060.Contig9_All	9.99	11.04	11.6	15.4	15.71	14.89
CL11062.Contig1_All	3.99	3.61	3.48	10.95	8.35	6.91
CL11062.Contig2_All	0.26	0.41	0.27	3.73	4.6	3.58
CL11064.Contig1_All	0	0.12	0	3.68	3.36	2.78
CL11064.Contig2_All	1.36	1.99	1.58	2.48	4	4.82
CL11064.Contig3_All	0.74	0.79	0.71	2.15	2.77	2.28
CL11064.Contig4_All	2.68	3.43	2.92	0.78	1.88	1.38
CL11065.Contig11_All	21.35	21.53	22.48	14.24	13.07	11.99
CL11065.Contig12_All	6.93	7.85	6.82	2.78	2.46	2.51
CL11065.Contig13_All	4.43	4.93	5.83	14.32	14.07	13.68
CL11065.Contig15_All	7.44	8.6	7.92	4.48	4.32	4.96
CL11065.Contig3_All	4.4	3.61	5.02	7.98	9.41	7.12
CL11065.Contig4_All	16	14.55	15.65	25.48	26.82	28.05
CL11065.Contig5_All	5.29	6.74	5.81	8.28	9.23	8.85
CL11065.Contig6_All	16.02	18.35	17.25	21.12	22.54	25.44
CL11065.Contig7_All	9	9.72	9	29.85	29.4	29
CL11065.Contig9_All	6.69	6.43	5.01	3.9	4.21	3.35
CL11067.Contig2_All	0.38	0	0	2.97	4.54	4.7
CL11067.Contig4_All	2.68	2.25	1.71	0.81	0.35	0.9
CL11067.Contig5_All	5.26	4.82	5.1	12	14.09	14.8
CL11069.Contig2_All	0.56	1.5	1.51	6.02	3.66	6.54
CL1107.Contig10_All	0.49	0.29	0.8	1.95	2.67	1.99
CL1107.Contig12_All	1.1	1.26	2.23	5.6	5.62	4.17
CL1107.Contig1_All	3.69	3.43	2.61	1.04	1.33	1.48
CL1107.Contig2_All	4.92	5.66	5.12	9.56	7.05	8.56
CL1107.Contig3_All	4.27	4.06	4.24	1.09	1.47	1.6
CL1107.Contig4_All	0.4	0.22	0.05	1.16	0.86	1.34
CL1107.Contig5_All	1.2	1.08	1.6	3.23	3.87	3.69
CL1107.Contig7_All	0.28	0.17	0	0.61	0.87	0.72
CL1107.Contig8_All	0.99	0.93	0.68	1.78	1.72	2.36
CL11071.Contig1_All	21.24	22.48	20.78	16.8	17.07	15.6
CL11071.Contig2_All	9.04	11.02	10.61	7.54	7.77	6.58
CL11072.Contig3_All	12.21	11.48	14.58	17.95	19.33	19.51
CL11072.Contig5_All	0.65	0.79	0.65	2.3	2.26	2.08
CL11072.Contig7_All	0	0	0.37	1.84	2.05	2.19
CL11073.Contig1_All	24.54	23.9	24.59	22.52	22.02	24.27
CL11076.Contig1_All	2.16	1.98	1.27	0.25	0	0
CL11077.Contig12_All	2.96	3.5	3.26	4.83	5.07	5.84
CL11077.Contig2_All	1.24	1.28	1.01	0.44	0.65	0.43
CL11077.Contig6_All	1.94	2.1	1.96	4.42	4.61	3.97
CL11077.Contig8_All	5.79	5.97	7.38	2.2	2.67	2.46
CL11078.Contig1_All	1.05	1.4	1.86	0.47	0.16	0.31
CL11079.Contig2_All	0.26	0	0.24	2.45	3.22	4.6
CL1108.Contig1_All	3.87	4.18	4.36	8.96	10.27	11.2
CL1108.Contig3_All	12.27	10.9	12.91	24.37	23.48	26.51
CL1108.Contig4_All	6.65	6.86	6.11	1.77	2.19	1.82
CL1108.Contig5_All	7.86	8.59	9.84	13.31	11.68	12.46
CL11081.Contig10_All	1.34	1.26	1.13	2.85	4.14	3.96
CL11081.Contig14_All	2.16	2.67	1.85	6.16	6.28	5.89
CL11081.Contig17_All	0.72	0.49	0.97	0.07	0.23	0
CL11081.Contig18_All	8.04	9.27	8.12	12.35	14.13	12.76
CL11081.Contig19_All	1.47	1.71	1.6	3.93	4.19	4.29
CL11081.Contig20_All	2.58	2.72	2.86	6.32	6.97	6.47
CL11081.Contig21_All	1.73	1.81	1.46	2.57	2.79	2.48
CL11081.Contig3_All	1.14	1.68	0.48	0	0	0
CL11082.Contig1_All	2.78	2.04	2.8	8.1	7.9	8.45
CL11082.Contig2_All	1.52	1.58	1.71	2.95	3.04	2.97
CL11082.Contig3_All	0.21	0.4	0.57	6.95	5.16	5.76
CL11082.Contig4_All	3.68	4.57	5.35	18.41	18.71	21.15
CL11082.Contig5_All	9.5	10.05	8.3	15.26	15.01	12.39
CL11082.Contig6_All	0.31	0.51	0.17	4.52	7.09	4.5
CL11083.Contig1_All	0.24	0.05	0.35	2.65	3.17	2.76
CL11083.Contig2_All	1.25	1.42	1.59	0.44	0.44	0.22
CL11084.Contig2_All	2.34	2.26	1.78	4.83	5.38	4.5
CL11084.Contig3_All	4.3	5.99	6.21	10.65	8.37	10
CL11084.Contig4_All	9.25	9.66	10.37	6.21	7.94	6.45
CL11084.Contig5_All	2.63	2.74	1.91	4.51	5.33	6.04
CL11085.Contig1_All	8.91	5.86	9.97	2.94	5.1	2.51
CL11085.Contig3_All	3.52	8.51	5.32	0.76	1.73	2.55
CL11085.Contig4_All	8.44	5.84	7.92	14.03	15.56	15.27
CL11085.Contig5_All	1.11	0.7	0.94	4.44	5.68	4.64
CL11087.Contig3_All	2.44	1.97	2.42	1.26	1.26	1.11
CL11087.Contig4_All	0.68	1.79	1.03	3.18	3.06	2.81
CL11089.Contig1_All	0	0.26	0.27	2.38	2.68	1.57
CL11089.Contig2_All	2.5	3	2.46	0.62	0	0.26
CL11091.Contig1_All	0	0.07	0.06	0.74	0.77	1.01
CL11091.Contig2_All	2.74	3.58	3.46	1.2	1.46	1.36
CL11092.Contig2_All	3.5	3.57	4.31	0.6	0.7	0.89
CL11093.Contig1_All	12.72	10.49	11.06	0	0	0
CL11094.Contig2_All	4.16	3.45	3.09	6.54	7.03	6.46
CL11095.Contig1_All	9.16	8.68	7.62	0.8	1.59	1.31
CL11097.Contig1_All	12.79	12.18	14.45	9.28	8.28	7.81
CL11097.Contig2_All	33.35	29.46	29.39	58.48	58.71	56.33
CL11099.Contig1_All	5.78	6.53	6.02	15.6	17.16	14.9
CL11099.Contig2_All	115.09	109.51	129.3	110.63	109.34	124.89
CL111.Contig2_All	10.39	9.32	9.18	7.17	7	5.35
CL111.Contig5_All	6.88	4.93	5.12	3.26	5.24	4.28
CL1110.Contig2_All	3.66	7.21	8.5	14.62	19.16	19.71
CL11102.Contig1_All	0.11	0.23	0.23	1.04	1.4	1.03
CL11103.Contig2_All	3.69	2.28	3.19	0.76	1.23	1.16
CL11103.Contig3_All	15.6	13.37	13.33	6.69	7.05	8.53
CL11103.Contig4_All	2.49	2.79	2.17	6.69	8.16	8.13
CL11103.Contig5_All	34.36	38.34	34.44	49.07	51.24	52.7
CL11103.Contig6_All	28.56	30.39	36.51	41.72	44.24	40.77
CL11103.Contig7_All	12.02	13.79	10.25	40.68	37.59	40.49
CL11103.Contig9_All	80.88	83.12	87.47	60.9	63.48	67.76
CL11105.Contig1_All	0	0	0	1.38	0.52	2.22
CL11105.Contig2_All	0	0	0	5.72	2.96	4.66
CL11105.Contig3_All	0	0	0	1.47	1.05	0.68
CL11106.Contig2_All	2.15	2.17	0.81	11.03	6.54	9.06
CL11107.Contig1_All	0.08	0	0.08	2.64	3.64	2.79
CL11108.Contig1_All	2.32	2.52	3.28	11.78	11.36	11.1
CL11108.Contig2_All	1.12	1.5	1.39	5.75	4.71	5
CL11108.Contig3_All	1.4	1.66	1.33	4.26	3.94	4.34
CL11108.Contig4_All	2.62	1.68	2.33	6.18	4.85	4.39
CL11108.Contig5_All	0.48	0.38	0.16	1.39	1.17	1.4
CL11108.Contig7_All	0	0.13	0	5.3	4.51	6.53
CL11109.Contig5_All	19.59	19.34	19.67	17.79	18.32	17.49
CL1111.Contig10_All	65.37	74.1	74.57	3.93	3.85	4.78
CL1111.Contig12_All	182.3	195.61	192.48	11.2	13.02	14.13
CL1111.Contig13_All	372.2	416.12	406.91	612.07	615.59	595.53
CL1111.Contig14_All	8.41	5.49	5.33	15.39	11.71	13.36
CL1111.Contig15_All	175.04	191.21	211.93	72.08	59.09	72.29
CL1111.Contig16_All	84.59	94.59	90.87	0.51	0.13	0.26
CL1111.Contig18_All	101.38	105.78	122.36	242.96	239.26	232.48
CL1111.Contig19_All	51.42	36.31	22.37	114.55	106.41	118.72
CL1111.Contig1_All	32.32	33.05	33.8	40.01	44.38	41.81
CL1111.Contig2_All	205.42	219.31	217.67	307.54	280.26	296.7
CL1111.Contig3_All	388.57	398.98	427.4	753.89	802.36	759.03
CL1111.Contig5_All	1.51	1.66	1.94	4.33	3.16	2.59
CL1111.Contig6_All	0.32	0	0.18	7.64	9.32	7.77
CL1111.Contig7_All	10.21	13.12	10.34	15.92	28.24	19.2
CL1111.Contig8_All	10.57	11.26	11.77	20.03	17.73	20.56
CL1111.Contig9_All	267.48	267.35	252.68	492.18	494.81	490.19
CL11111.Contig1_All	12.31	13.94	14.68	3.15	3.07	2.59
CL11111.Contig2_All	9.2	9.69	9.94	5.75	7.12	6.71
CL11111.Contig3_All	6.02	6.54	7.06	1.89	2.46	1.33
CL11111.Contig4_All	6.62	6.48	9.15	4.5	3.29	4.27
CL11111.Contig6_All	3.63	2.91	3.09	5.48	4.37	5.09
CL11112.Contig2_All	13.36	13.72	12.35	9.88	8.95	9.76
CL11112.Contig3_All	10.5	11.21	10.15	6.93	6.59	8.38
CL11112.Contig4_All	2.2	1.92	2.1	1.29	1.19	1.36
CL11113.Contig2_All	1.98	2.05	1.74	3.89	3.44	3.81
CL11113.Contig3_All	2.96	2.94	2.32	4.82	4.97	5.13
CL11113.Contig4_All	3.12	3.62	3.93	6.43	6.55	7.24
[truncated: 49,436 more rows]

## Sheet: E1 vs L1
Gene ID	E1_r1 FPKM	E1_r2 FPKM	E1_r3 FPKM	L1_r1 FPKM	L1_r2 FPKM	L1_r3 FPKM
CL1.Contig1_All	0.16	0.05	0.14	1.54	1.14	1.82
CL1.Contig2_All	0.34	0.24	0.38	0.72	0.7	0.73
CL10.Contig1_All	0	0	0	6	5.12	6.57
CL10.Contig2_All	8.45	8.66	8.44	5	4.75	3.86
CL10.Contig4_All	8.28	9.69	10.16	5.91	5.11	5.04
CL100.Contig3_All	1.35	0.9	1.28	2.59	2.01	2.15
CL100.Contig4_All	1.74	1.8	1.41	2.75	2.68	3.31
CL100.Contig6_All	0.4	0.26	0.38	2.43	1.5	1.04
CL1000.Contig1_All	2.7	2.8	2.88	1.64	1.5	1.71
CL1000.Contig2_All	2.87	3.23	4.27	2.43	2.17	2.74
CL10000.Contig1_All	2.03	1.91	1.26	0.57	0.54	0.59
CL10001.Contig1_All	0.75	0.41	0.22	0.97	1.4	1.37
CL10002.Contig2_All	3.25	2.68	1.69	1.55	0.86	1.03
CL10003.Contig1_All	1.43	1.82	2.26	7.14	7.72	5.73
CL10003.Contig2_All	47.11	41.82	48.24	35.59	36.31	35.37
CL10007.Contig3_All	0.74	0.99	1.88	0.32	0.23	0.53
CL10009.Contig3_All	1.42	2.21	1.76	0.62	0.29	0.48
CL1001.Contig10_All	5.75	5	5.72	8.35	8.23	7.76
CL1001.Contig11_All	2.46	2.02	1.59	1.29	1.69	1.67
CL1001.Contig12_All	1.94	1.62	1.83	4.36	4.36	4.3
CL1001.Contig13_All	1.94	2.31	2.54	4.7	5.36	4.03
CL1001.Contig14_All	0	0	0	1.33	1.82	1.05
CL1001.Contig15_All	4.83	4.88	5.67	2.03	2.03	2.36
CL1001.Contig16_All	1.47	1.18	1.53	3.81	3.74	3.74
CL1001.Contig17_All	1.3	1.76	1.62	2.88	2.31	2.96
CL1001.Contig18_All	2.34	2.63	2.49	2.2	1.97	1.82
CL1001.Contig20_All	1.33	1.39	1.33	0.66	0.46	0.39
CL1001.Contig22_All	13.24	16.18	13.9	18.73	19.92	20.8
CL1001.Contig23_All	2.33	2.56	3.14	0.29	0.67	0.4
CL1001.Contig24_All	18.61	19.04	19.57	13.58	12.01	11.64
CL1001.Contig25_All	10.29	13.55	13.69	4.26	6.74	6.23
CL1001.Contig26_All	1.18	2.39	2.41	2.92	3.81	3.57
CL1001.Contig28_All	61	61.08	59.79	79.7	77.59	78.71
CL1001.Contig29_All	0.37	0.26	0.46	1.43	0.73	1.13
CL1001.Contig4_All	8.3	7.88	8.76	5.4	4.02	5.7
CL1001.Contig5_All	2.13	1.84	2.09	4.21	3.91	3.55
CL1001.Contig6_All	5.42	5.53	4.61	2.69	2.35	3.09
CL10010.Contig1_All	4.32	4.43	4.51	13.96	11.95	13.18
CL10010.Contig2_All	56.45	59.52	58.3	15.1	17.35	19.66
CL10010.Contig3_All	4.39	5.02	4.79	0.65	0.69	0.79
CL10010.Contig4_All	28.43	30.56	29.64	27.73	29.25	29.26
CL10010.Contig5_All	35.31	36.85	34.21	24.52	23.53	24.57
CL10010.Contig6_All	16.84	17.63	16.25	12.46	12.84	14.12
CL10011.Contig1_All	21.25	24.78	22.73	17.94	20.26	16.78
CL10013.Contig1_All	2.72	2.27	2.75	1.31	1.39	1.05
CL10013.Contig2_All	1.72	1.08	1.1	0.6	0.83	0.47
CL10013.Contig3_All	0.3	0.34	0.27	0	0	0
CL10013.Contig4_All	3.12	2.95	2.79	7.74	8.89	8.55
CL10013.Contig5_All	1.27	0.87	0.72	2.36	1.85	2.07
CL10013.Contig7_All	1.56	1.7	1.25	0	0	0
CL10015.Contig1_All	3.42	3.53	2.67	1.25	1.79	1.66
CL10015.Contig2_All	0.41	0.24	0.49	1.65	1.24	1.34
CL10015.Contig3_All	1.36	1.61	1.38	2.31	2.42	2.62
CL10015.Contig4_All	1.56	1.24	1.45	2.29	2.53	2.36
CL10017.Contig3_All	7.48	6.69	8.37	5.1	5.72	5.78
CL10018.Contig1_All	0.11	0.08	0.22	1.15	1.82	1.67
CL10018.Contig2_All	1.49	1.19	2.04	0	0.09	0
CL10019.Contig2_All	1.63	1.05	2.05	0.71	0.52	0.28
CL10019.Contig3_All	1.5	1.75	1.32	6.8	7.32	6.88
CL10019.Contig4_All	4.43	4.47	4.78	0.98	0.88	1.07
CL1002.Contig1_All	2.63	3.84	3.77	1.07	1.27	0.44
CL1002.Contig2_All	0	0	0.05	1.42	1.75	1.87
CL1002.Contig3_All	32.59	32.83	28.38	23.78	20.91	22.86
CL1002.Contig4_All	106.64	102.79	100.27	25.34	25.8	24.39
CL1002.Contig5_All	106.19	109.49	112.51	209.63	210.05	202.04
CL10021.Contig10_All	2.85	3.65	2.77	0	0	0
CL10021.Contig11_All	25.44	30.81	27.21	0.11	0.05	0
CL10021.Contig12_All	0.99	1.33	1.19	0	0	0.1
CL10021.Contig13_All	4.86	6.69	4.62	1.63	1.33	1.82
CL10021.Contig14_All	1.89	1.64	1.42	3.75	3.55	3.39
CL10021.Contig15_All	2.94	3.39	2.67	0	0	0
CL10021.Contig16_All	3.22	3.93	3.89	11.98	13.12	10
CL10021.Contig17_All	11.78	10.77	10.38	18.01	16.45	17.42
CL10021.Contig18_All	0.46	0.48	0	0	0	0
CL10021.Contig19_All	0.17	0.6	0.47	16.23	14.8	13.9
CL10021.Contig1_All	3.89	4.58	3.34	0.06	0.05	0.06
CL10021.Contig20_All	0.26	0.09	1.02	0	0	0
CL10021.Contig21_All	1.48	1.47	0.32	0	0	0
CL10021.Contig23_All	7.07	8.43	7.72	15.85	14.98	17.81
CL10021.Contig25_All	64.39	63.67	63.48	45.47	46.58	46.98
CL10021.Contig26_All	17.91	16.26	16.04	14.2	13.39	11.94
CL10021.Contig27_All	2.02	2.47	3.41	0	0	0
CL10021.Contig2_All	0	0	0	0.25	0.14	0.24
CL10021.Contig5_All	0	0	0	6.96	7.75	5.82
CL10021.Contig6_All	1.51	0.98	1.56	0.2	0.25	0
CL10021.Contig8_All	0.8	0.8	0.74	3.01	2.59	1.66
CL10022.Contig1_All	4.37	4.09	3.38	0.38	0	0.11
CL10022.Contig3_All	0.17	0.09	0.22	0	0	0
CL10022.Contig4_All	2.83	2.19	2.85	0.38	0.5	0.48
CL10023.Contig2_All	7.15	7.04	6.43	3.72	3.67	4.92
CL10026.Contig2_All	2.11	2	1.34	5.29	4.15	4.78
CL10026.Contig3_All	7.82	8.16	9.05	5.3	5.03	5.58
CL10026.Contig4_All	11.53	12.94	11.33	8.72	9.86	8.93
CL10028.Contig2_All	2.02	2.8	3	6.09	5.79	5.19
CL10029.Contig2_All	8.08	8.05	7.73	7.81	6.65	7.7
CL10029.Contig3_All	10.39	12.15	11.42	14.77	14.54	14.99
CL1003.Contig1_All	19.44	21.69	17.59	3.68	3.42	2.63
CL1003.Contig2_All	70.33	68.69	80.36	47.12	53.25	55.93
CL1003.Contig3_All	33.18	30.6	34.12	68.68	64.67	67.22
CL10030.Contig1_All	0	0	0	0.76	0.86	0.63
CL10030.Contig2_All	16.45	16.89	14.98	9.58	10.99	10.35
CL10031.Contig1_All	0.52	0.31	0.39	1.62	1.02	1.21
CL10033.Contig1_All	3.58	4.21	4.04	5.95	6.25	6.13
CL10033.Contig3_All	6.94	7.44	7.94	5.69	6.05	6.48
CL10035.Contig2_All	0	0	0	3.4	4.23	4.2
CL10036.Contig1_All	0	0	0	1.21	1.7	1.26
CL10036.Contig4_All	16.67	16.36	15.96	4.39	2.73	4.68
CL10037.Contig15_All	0	0	0	0.32	0.68	0.82
CL10037.Contig16_All	0.06	0	0.22	1.76	1.09	1.32
CL10037.Contig1_All	1.64	1.32	0.84	0.28	0.34	0.58
CL10037.Contig20_All	0.44	0.57	0.28	0	0	0
CL10037.Contig21_All	0	0	0	0.25	0.18	0.36
CL10037.Contig22_All	0.19	0.1	0	1.74	1.6	2.35
CL10037.Contig27_All	0.55	0.6	0.48	2.05	1.95	2.14
CL10037.Contig35_All	0.61	0.34	0.28	1.35	0.96	1.19
CL10037.Contig37_All	18.35	17.98	19.27	18.44	17.34	18.48
CL10037.Contig38_All	5.16	5.6	3.14	0	0	0
CL10037.Contig3_All	0.49	0.27	0	0	0	0
CL10037.Contig4_All	1.88	1.68	3.1	0	0	0
CL10037.Contig5_All	0.34	0.54	0.53	1.18	1.22	1.23
CL10037.Contig7_All	1.4	1.02	2.2	0.16	0.09	0.08
CL10037.Contig9_All	0.04	0.08	0.11	0.32	0.73	0.65
CL10038.Contig3_All	2.49	2.58	2.52	1.31	0.8	1.39
CL10039.Contig1_All	0	0.31	0.61	2.57	1.67	3.67
CL1004.Contig3_All	0.74	0.74	0.41	1.94	1.77	1.47
CL1004.Contig4_All	1.1	1.22	1.34	0.93	0.82	0.84
CL1004.Contig6_All	0.3	0.77	0.66	0.29	0.4	0.15
CL1004.Contig7_All	0.33	0.37	0.21	0.14	0	0.09
CL10040.Contig1_All	4.54	4.92	5.97	3.44	1.78	4.23
CL10042.Contig3_All	1.52	1.12	1.1	0.65	0.75	0.62
CL10043.Contig11_All	1.6	1.17	0.49	0	0	0
CL10043.Contig12_All	5.31	4.33	4.84	0.53	0.49	0.49
CL10043.Contig13_All	0	0.02	0	0.87	0.63	0.69
CL10043.Contig17_All	1.49	1.53	1.46	0.08	0	0.19
CL10043.Contig18_All	0.5	0.67	0.3	2.58	2.42	2.4
CL10043.Contig19_All	0.07	0.08	0.12	0.81	0.63	0.72
CL10043.Contig1_All	0.08	0.09	0.28	0.88	1.43	0.96
CL10043.Contig21_All	0.24	0.32	0.47	0.76	1	0.64
CL10043.Contig22_All	0.87	0.63	0.66	3.63	3.91	3.43
CL10043.Contig24_All	2.53	2.22	3.06	0.56	1.51	0.87
CL10043.Contig29_All	0.28	0	0.23	1.49	1.11	1.94
CL10043.Contig2_All	0.66	0.74	0.69	0.13	0.45	0.16
CL10043.Contig30_All	1.45	1.82	1.12	2.86	3.19	3.74
CL10043.Contig35_All	3.76	4.5	4.53	3.71	3.61	2.72
CL10043.Contig3_All	0.27	0.22	0.21	0.81	0.48	1.19
CL10043.Contig4_All	0.67	0.67	0.85	1.44	1.02	1.43
CL10043.Contig6_All	1.2	0.54	0.62	0.11	0.09	0.16
CL10043.Contig7_All	1.67	1.56	0.83	3.26	3.16	3.69
CL10043.Contig8_All	0.13	0.17	0.16	0.69	0.44	0.26
CL10044.Contig2_All	0.96	0.87	0.67	0.16	0.14	0.18
CL10044.Contig4_All	1.04	0.87	0.46	1.84	1.58	1.57
CL10045.Contig2_All	1.14	0.84	1.23	0	0.11	0.29
CL10046.Contig1_All	5.79	6.04	3.98	2.68	3.26	3.63
CL10046.Contig2_All	3.36	3.84	3.61	1.84	2.01	0.87
CL10047.Contig2_All	1.91	2.06	2.21	3.64	4.21	4.45
CL10048.Contig2_All	0.05	0.08	0.04	1.77	1.76	1.58
CL10048.Contig5_All	0	0	0	0.96	0.96	0.97
CL10049.Contig3_All	1.44	2.05	1.85	1.24	1.62	1.31
CL10049.Contig5_All	0.84	1.06	0.68	1.38	1.41	1.78
CL10050.Contig1_All	1.61	1.31	1.66	3.76	3.84	3.74
CL10050.Contig4_All	3.41	4.01	4.02	1.89	2.77	1.9
CL10050.Contig5_All	8.57	8.51	8.79	14.73	15.42	16.1
CL10050.Contig6_All	2.8	3.66	2.92	4.36	5.91	5.27
CL10051.Contig1_All	0.07	0.06	0.05	0.38	0.56	0.56
CL10051.Contig2_All	0.27	0.42	0.1	0.7	0.81	0.74
CL10051.Contig5_All	5.91	6.01	5.87	5.53	5.09	5.92
CL10051.Contig6_All	4.22	4.08	4.75	7.32	8.04	7.12
CL10052.Contig1_All	13.46	11.5	11.81	0.37	0.15	0.23
CL10052.Contig2_All	1.49	1.25	1.01	11.85	12.53	8.96
CL10052.Contig3_All	0.26	0.58	0.32	21.17	25.21	21.82
CL10052.Contig4_All	17.84	14.84	19.3	14.03	11.58	12.28
CL10052.Contig5_All	3.49	4.12	4.12	2.29	1.73	1.98
CL10053.Contig2_All	2.9	3.13	3.12	6.25	5.85	5.33
CL10055.Contig1_All	2.69	2.51	3.45	6.46	7.36	7.71
CL10055.Contig2_All	3.97	4.33	5.94	12.28	13.96	14.21
CL10056.Contig1_All	0.62	0.99	1.01	1.84	2.07	2.51
CL10056.Contig4_All	0.41	0.61	0.31	3.14	2.16	3.56
CL10056.Contig6_All	3.3	2.61	3.34	5.88	5.43	4.74
CL10059.Contig1_All	0	0	0.21	4.41	4.15	1.62
CL10059.Contig2_All	1.28	3.76	2.77	0	0	0
CL1006.Contig1_All	2.83	3.14	2.82	2.57	2.16	2.37
CL10060.Contig1_All	9.82	10.02	9.87	8.05	8.15	8.09
CL10061.Contig2_All	8.29	7.83	7.89	5.62	5.36	5.33
CL10062.Contig1_All	1.93	2.48	3.43	7.97	11.94	11.22
CL10063.Contig1_All	0.94	0.69	0.89	9.55	7.19	7.23
CL10063.Contig3_All	13.48	17.04	14.77	15.16	12.72	12.72
CL10064.Contig1_All	1.25	2.09	2.32	4.74	4.49	4.18
CL10064.Contig3_All	0.42	0.59	0.31	1.35	2.61	2.32
CL10064.Contig4_All	13.13	13.22	11.98	7.92	6.05	8.1
CL10064.Contig5_All	9.35	8.88	8.01	8.08	7.8	7.4
CL10065.Contig2_All	2.11	2.65	2.28	1.42	1.28	1.45
CL10065.Contig3_All	2.14	1.95	2.62	6.03	7.16	5.83
CL10066.Contig1_All	13.76	14.58	12.36	24.16	29.47	28.01
CL10066.Contig2_All	4.81	5.34	4.03	23.55	24.51	25.72
CL1007.Contig4_All	4.37	2.84	3.12	1.99	2.85	2.3
CL10071.Contig2_All	1.1	0.8	1.1	0.54	0.38	0.29
CL10072.Contig2_All	3.86	4.16	4.38	6.72	6.69	7.3
CL10072.Contig3_All	2.63	2.08	2.52	5.71	5.75	5.92
CL10072.Contig4_All	1.93	1.64	2.08	1.1	1.02	0.93
CL10072.Contig5_All	6.79	6.52	5.93	1.73	2.01	1.77
CL10072.Contig6_All	2.62	3.34	3.2	1.58	1.73	1.23
CL10074.Contig1_All	0	0	0	0.89	2.52	1.86
CL10075.Contig2_All	7.41	6.18	7.2	12.37	11.45	9.26
CL10078.Contig1_All	1.69	2.26	1.57	0.72	0.79	0.7
CL10078.Contig2_All	0.96	1.27	0.97	0	0	0
CL10078.Contig3_All	0	0	0	7.85	7.85	8.04
CL10078.Contig5_All	0.71	0.56	0.46	3.24	2.58	3.21
CL10078.Contig8_All	3.67	3.88	3.53	2.98	2.62	3.09
CL10079.Contig2_All	0	0.16	0	1.39	1.23	1.11
CL10082.Contig5_All	1.69	3.33	2.8	9.38	8.77	10.52
CL10083.Contig1_All	4.18	3.56	5.59	9.98	10.7	9.04
CL10083.Contig2_All	1.25	1.68	1.22	0.22	0.38	0.25
CL10083.Contig5_All	1.15	1.06	0.43	0.26	0	0
CL10083.Contig6_All	1.63	1.67	2.42	0.74	0.81	0.72
CL10084.Contig1_All	0.72	0.93	1.16	0	0	0
CL1009.Contig2_All	2	1.52	1.38	0	0.11	0.3
CL1009.Contig5_All	0.72	0.81	0.93	0.3	0.37	0.17
CL10090.Contig3_All	2.38	2.39	3.52	5.1	3.74	5.98
CL10090.Contig6_All	6.92	5.38	5.93	3.33	2.7	2.28
CL10091.Contig1_All	2.09	2.46	1.62	1.26	1.08	1.06
CL10091.Contig2_All	2.53	2.64	2.16	5.1	4.49	3.64
CL10091.Contig3_All	6.39	8.31	7.11	10.83	10.51	11.62
CL10092.Contig1_All	1.67	1.26	0.65	0.37	0.36	0.5
CL10092.Contig2_All	0.2	0.91	0.85	0	0.18	0
CL10092.Contig4_All	2.22	1.8	1.71	4.72	4.3	3.94
CL10094.Contig2_All	23.43	24.09	23.72	30.13	30.52	33.03
CL10095.Contig1_All	1.49	3.68	2.94	0.36	0	0.38
CL10095.Contig2_All	2.79	1.97	1.81	5.33	3.76	4.21
CL10096.Contig1_All	0	0	0	1.15	1.78	1.65
CL10096.Contig2_All	0	0	0	1.07	1.21	0.45
CL10096.Contig4_All	1.73	1.28	0.79	8.77	9.2	9.09
CL10097.Contig5_All	15.31	13.44	13.94	20.6	17.04	18.81
CL10098.Contig3_All	5.24	4.5	6.83	2.27	2.92	3.42
CL10099.Contig2_All	3.84	3.99	3.83	6.77	6.53	7.69
CL10099.Contig4_All	8.01	11.75	9.62	7.16	8.57	7.35
CL10100.Contig1_All	1.42	3.61	2.63	0	0	0
CL10103.Contig2_All	3.81	4.61	5.14	1.64	0.68	1.69
CL10103.Contig3_All	4.17	3.29	3.65	0	0.17	0
CL10103.Contig4_All	1.74	2.31	1.52	0	0	0
CL10104.Contig2_All	0.7	0.52	0.7	0.49	0.21	0.11
CL10104.Contig3_All	2.36	2.4	2.52	1.95	1.89	1.81
CL10106.Contig2_All	0.61	0.44	0.7	1.25	1.82	1.6
CL10106.Contig5_All	0.21	0.21	0.3	2.21	1.68	1.2
CL10106.Contig8_All	0	0	0	2.1	3.66	2.35
CL10107.Contig1_All	0.68	0.41	0.68	2.37	2.34	2.63
CL10107.Contig4_All	1.24	0.78	0.94	3.05	1.98	2.33
CL10107.Contig5_All	1.89	2.42	2.24	0.86	0.45	0.54
CL10108.Contig1_All	1.57	0.97	0.51	5.83	4.29	3.79
CL10108.Contig4_All	0	0	0	1.61	1.95	1.66
CL10108.Contig5_All	1.68	1.04	1.22	0.57	0.5	0.58
CL1011.Contig10_All	2.55	2.02	2.61	4.63	4.27	4.61
CL1011.Contig11_All	23.08	24.13	22.24	38.38	34.01	37.3
CL1011.Contig1_All	0	0	0	4.34	5.4	4.17
CL1011.Contig2_All	3.36	1.71	2.3	1.25	1.22	0.87
CL1011.Contig4_All	8.02	4.81	7.67	1.59	1.46	2.03
CL1011.Contig6_All	59	59.38	54.4	38.4	37.49	38.52
CL1011.Contig8_All	3.19	2.03	2.46	1.06	1.27	1.52
CL1011.Contig9_All	29.64	28.89	29.83	94.8	103.64	102.25
CL10110.Contig1_All	3.63	5.54	4.3	1.89	1.8	1.9
CL10110.Contig2_All	1.89	1.07	1.85	5.11	4.47	4.25
CL10111.Contig12_All	0.44	0.22	0.36	0.07	0.2	0
CL10111.Contig13_All	0.29	0.52	0.25	0.18	0.11	0
CL10111.Contig1_All	0	0.06	0	0.38	0.41	0.43
CL10111.Contig3_All	3.69	2.9	3.27	1.6	1.83	1.86
CL10111.Contig6_All	0	0	0	0.42	0.29	0.31
CL10111.Contig8_All	0	0	0	2.26	2.41	1.2
CL10111.Contig9_All	0.15	0	0.07	0.56	0.67	0.87
CL10112.Contig1_All	0	0	0	1.46	1.52	1.6
CL10112.Contig2_All	2.59	1.86	1.62	0.85	0	0.3
CL10113.Contig7_All	2.26	1.39	2.17	0.81	0.68	0.7
CL10114.Contig2_All	3.06	3.62	3.18	1.71	2.01	1.15
CL10116.Contig2_All	34.52	34.78	32.8	33.56	34.87	34.13
CL10117.Contig3_All	12.46	12.08	10.64	10.09	10.66	9.8
CL10117.Contig6_All	2.67	2.03	2.24	0.76	0.92	1.66
CL10118.Contig2_All	0.75	1.02	0.83	0	0	0
CL10118.Contig3_All	0.25	0.09	0.18	1.7	1.07	1.61
CL1012.Contig2_All	1.39	0.76	0.89	16.93	17.95	15.35
CL1012.Contig3_All	1.59	1.11	1.63	0	0	0
CL1012.Contig4_All	4.05	3.79	5.66	1.72	1.66	1.51
CL10121.Contig2_All	1.44	0.96	1.3	3.16	2.27	2.9
CL10122.Contig1_All	1.6	2.51	2.1	0	0	0.23
CL10122.Contig2_All	10.31	7.83	9.54	22.17	19.75	16.94
CL10123.Contig3_All	5.04	5.29	6.14	9.04	7.62	7.96
CL10123.Contig4_All	8.26	7.11	7.09	9.79	11.03	10.66
CL10123.Contig6_All	15.22	15.82	15.46	22.9	23.87	24.16
CL10124.Contig1_All	6.96	7.47	6.44	6.17	5.14	5.87
CL10124.Contig2_All	4.76	5.26	5.71	4.44	5.22	4.35
CL10125.Contig1_All	0.93	0.8	0.96	2.35	2.86	4.54
CL10125.Contig2_All	0	0	0	0.72	1.34	1.55
CL10127.Contig1_All	0.83	0.94	0.92	2.46	2.41	1.72
CL10128.Contig2_All	0	0	0	1.76	1.47	0.36
CL10128.Contig3_All	0.09	0.06	0.06	0.57	1.17	1.9
CL10129.Contig1_All	1.68	1.52	2.5	10.35	10.57	8.65
CL10129.Contig2_All	0.17	0.33	0.49	6.52	7.16	7.85
CL1013.Contig2_All	1.61	1.69	1.91	0.92	0.88	0.76
CL1013.Contig3_All	3.57	3.21	4.08	8.37	8.39	7.53
CL1013.Contig4_All	5.94	8.15	8.09	4.71	4.59	3.98
CL1013.Contig5_All	38.6	37.37	36.07	37.35	39.78	35.38
CL1013.Contig7_All	20.79	20.65	20.47	13.63	13.31	16.38
CL10130.Contig1_All	7.48	7.82	6.16	13.93	14.32	12.43
CL10130.Contig2_All	15.31	15.26	17.47	7.73	7.35	10.06
CL10130.Contig4_All	6.93	7.88	7.41	13.7	12.8	13.64
CL10130.Contig5_All	0.83	1.13	0.85	3.6	4.38	4.12
CL10130.Contig6_All	7.39	6.7	7.57	6.86	5.84	7.14
CL10131.Contig1_All	7	6.41	8.44	19.62	18.24	21.4
CL10131.Contig2_All	1.82	2.31	1.95	0.93	1.36	1.24
CL10131.Contig4_All	11.56	12.06	12.05	16.33	19.64	18.13
CL10132.Contig3_All	1.8	2.11	1.81	0.25	0.79	0.6
CL10132.Contig4_All	25.03	28.44	23.57	24.13	23.8	22.19
CL10132.Contig5_All	20.88	21.4	20.39	18.01	19.9	19.23
CL10134.Contig4_All	4.74	3.35	4.45	12.53	9.83	11.1
CL10134.Contig5_All	22.46	24.39	21.65	19.04	19.35	18.11
CL10137.Contig1_All	1.07	0.78	0.72	10.67	9.69	9.06
CL10137.Contig4_All	18.58	18	19.67	3.87	3.8	4.68
CL10137.Contig6_All	2.26	2.54	2.42	13.83	13.79	16.19
CL10138.Contig1_All	0	0.27	0	1.84	2.01	1.91
CL10138.Contig2_All	0.24	0	0	1.07	1	1.98
CL10139.Contig1_All	8.35	8.28	9.24	3.96	5.21	3.87
CL10139.Contig2_All	13.9	13.95	13.03	7.03	7.08	8.63
CL1014.Contig1_All	0.12	0.17	0.2	3.31	3.37	3.81
CL1014.Contig2_All	8.53	9.23	8.62	4.59	3.79	4.05
CL1014.Contig3_All	0.82	1.13	0.93	9.72	9.18	8.47
CL1014.Contig4_All	1.3	1.26	1.16	0.13	0.06	0.19
CL1014.Contig5_All	0.36	0.3	0.48	2.71	2.83	4.19
CL1014.Contig6_All	0.44	0.57	0.41	0.99	0.85	1.1
CL1014.Contig7_All	1.82	2.04	1.65	4.15	4.05	4.31
CL10142.Contig1_All	0.62	0.94	1.14	5.68	6.83	7.32
CL10142.Contig3_All	6.74	7.56	6.21	0.81	0.23	0.16
CL10142.Contig4_All	0	0.72	0.46	2.28	3.3	3.52
CL10144.Contig2_All	1.17	1.57	1.94	0.44	0.49	0.61
CL10144.Contig3_All	3.81	3.71	4.09	1.3	1.03	0.73
CL10146.Contig1_All	1.99	2.06	1.4	0.54	0.19	0.34
CL10146.Contig2_All	2.04	1.22	1.71	0.61	0.68	0.49
CL10146.Contig3_All	2.37	2.23	1.98	0.66	0.67	0.71
CL10147.Contig2_All	2.78	2.74	3.14	0.29	0.4	0.28
CL10148.Contig1_All	2.28	2	2.11	4.8	4.38	4.55
CL10148.Contig2_All	3.62	4.26	4.23	2.8	3.23	3.3
CL10149.Contig1_All	1.93	3.82	2.29	11.43	10.34	10.26
CL10149.Contig2_All	6.81	7.16	6.65	1.95	2.23	2.28
CL10149.Contig3_All	5.5	5.19	5.76	25.66	24.53	27.39
CL10149.Contig5_All	6.96	8.09	6.84	12.47	14.3	16.57
CL10149.Contig6_All	28.33	26.97	25.4	8.74	8.39	9.52
CL10149.Contig7_All	2.89	3.2	4.13	7.88	9	7.51
CL1015.Contig2_All	0.93	0.43	0.95	0	0	0
CL1015.Contig3_All	3.34	3.44	2.94	0	0	0
CL1015.Contig5_All	0.4	1.06	0.85	2.69	4.42	2.12
CL10150.Contig1_All	1.11	1.4	1.42	3.13	3.64	3.76
CL10150.Contig3_All	3.94	5.4	4.85	8.66	8.07	8.5
CL10150.Contig4_All	0.48	1.42	1.71	0	0	0
CL10150.Contig6_All	8.94	9.22	10.65	3.94	3.91	4.41
CL10151.Contig1_All	0.33	0.27	0.26	3.89	2.84	3.26
CL10151.Contig2_All	2.37	2.13	1.62	3.8	5.8	4.62
CL10151.Contig4_All	1.42	3.1	1.61	0.66	0.18	0.31
CL10151.Contig7_All	0	0.45	0.22	4.73	4.22	3.24
CL10152.Contig1_All	1.75	2.51	2.47	6.46	9.24	5.77
CL10153.Contig1_All	8.95	7.69	6.38	14.79	13.91	14.2
CL10153.Contig4_All	0.46	0.2	0	1.91	1.12	2.57
CL10156.Contig5_All	8.86	8.29	7.78	5.79	5.38	5.36
CL10157.Contig1_All	1.52	1.42	1.26	0.5	0	0.17
CL10158.Contig1_All	26.57	24.35	26.5	39.83	39.71	41.86
CL10158.Contig2_All	43.11	44.97	45.2	84.95	90.25	88.31
CL10158.Contig3_All	21.71	24.13	24.06	29.26	31.47	30.64
CL1016.Contig2_All	2.99	2.58	4.64	0	0	0.09
CL1016.Contig3_All	4.97	4.62	4.88	0.47	0.35	0.39
CL10160.Contig2_All	0.48	0.73	0.54	0.96	2.46	1.46
CL10160.Contig3_All	2.26	2.59	1.59	5.29	4.08	4.73
CL10163.Contig1_All	0.94	1.22	1.06	3.19	4.06	3.7
CL10163.Contig2_All	4.52	5.01	6.92	2.96	3.11	3.22
CL10164.Contig1_All	5.65	5.71	5.3	11.56	10.65	12.28
CL10164.Contig2_All	1.53	2.09	1.82	4.81	4.89	5.43
CL10164.Contig5_All	2.58	2.45	3.01	5.7	6.09	6.93
CL10164.Contig6_All	1.32	1.08	1.12	2.41	3.83	3.09
CL10167.Contig2_All	0.4	0.43	0.4	3.82	3.02	2.75
CL10167.Contig3_All	0.95	0.6	0.63	2.54	1.78	1.59
CL10169.Contig1_All	2.29	4.26	5.17	1.88	1.67	2.02
CL10169.Contig2_All	4.86	6.15	4.62	2.36	3.1	2.37
CL10169.Contig3_All	7.69	6.42	5.17	1.97	2.11	1.95
CL1017.Contig2_All	0	0.2	0.21	0.77	0.98	0.49
CL1017.Contig4_All	6.72	5.45	5.83	2.51	1.39	2.19
CL1017.Contig5_All	0	0	0	0.4	0	0.6
CL10170.Contig1_All	6.39	7.49	7.41	16.49	16.75	19.75
CL10171.Contig2_All	9.63	9.77	10.52	8.68	8.53	9.45
CL10171.Contig4_All	4.24	4.41	4.53	3.78	4.05	3.52
CL10172.Contig3_All	0.49	0.78	1.29	4.63	4	3.5
CL10172.Contig4_All	3.93	4.21	4.16	1.75	1.45	1.99
CL10173.Contig1_All	23.8	20.79	23.64	16.46	19.28	20.28
CL10173.Contig2_All	29.71	26.67	20.23	57.96	69.69	51.68
CL10173.Contig3_All	78.43	68.08	82.51	27.81	37.36	30.4
CL10174.Contig1_All	27.78	31.2	26.29	1.29	0.87	0.39
CL10174.Contig2_All	3.67	4.15	2.99	1.21	0.78	0.6
CL10174.Contig3_All	133.97	146.9	139.91	82.42	90.84	93.45
CL10174.Contig5_All	5.78	7.36	8.58	5.84	5.06	5.67
CL10174.Contig6_All	36.12	40.17	34.91	28.36	26.12	25.64
CL10174.Contig7_All	24.77	20.59	22.43	0	0	0.18
CL10179.Contig2_All	15.94	14.29	15.38	11.45	12.51	11.79
CL1018.Contig10_All	1.79	1.56	1.31	0.38	0.4	0.55
CL1018.Contig11_All	3.49	3.55	3.7	9.25	9.39	9.06
CL1018.Contig1_All	7.55	7.74	7.81	1.47	1.24	1.09
CL1018.Contig2_All	2.63	2.24	1.85	5.03	5.14	4.62
CL1018.Contig4_All	0.18	0.21	0	2.73	2.6	3.43
CL1018.Contig5_All	2.44	2.64	3.31	0.13	0.1	0.13
CL1018.Contig6_All	0	0.28	0	1.04	1.27	0.58
CL1018.Contig7_All	2.38	2.52	2.69	5	5.51	5.5
CL10180.Contig1_All	0	0.23	0	2.28	3.14	1.5
CL10181.Contig1_All	5.3	5.68	5.11	9.18	9.71	9.08
CL10181.Contig2_All	2.91	3.73	3.96	5.42	6.93	5.56
CL10186.Contig1_All	5.09	6.26	5.49	8.08	8.86	8.49
CL10186.Contig2_All	1.08	1.42	0.91	0.44	0.11	0
CL10187.Contig2_All	4.24	4.62	3.88	3.27	3.72	3.42
CL1019.Contig1_All	13.08	17.01	14.36	20.74	20.61	19.99
CL1019.Contig3_All	1.83	1.34	1.73	5.45	5.27	5.73
CL10190.Contig1_All	3	2.96	4.08	5.47	5.27	5.71
CL10190.Contig2_All	7.8	7.43	8.01	6.28	5.95	7
CL10192.Contig1_All	1.64	1.38	1.23	0.64	0.4	0.44
CL10192.Contig2_All	5.52	4.74	4.61	2.9	2.71	2.55
CL10192.Contig3_All	1.42	1.73	2.25	3.29	4.09	3.57
CL10193.Contig2_All	23.31	18.99	21.27	29.67	30.3	30.88
CL10193.Contig3_All	20.96	24.04	24.48	14.09	17.51	11.45
CL10195.Contig1_All	0.28	0.15	0	2.88	1.44	1.73
CL10196.Contig2_All	5.41	4.85	6.07	9.02	9.06	8.74
CL10196.Contig4_All	1.4	1.09	1.64	2.92	3.71	2.9
CL10196.Contig5_All	2.16	2.61	3.05	1.19	1.9	1.66
CL10196.Contig6_All	16.33	15.47	16.7	27.34	26.98	27.57
CL10197.Contig3_All	0.64	0.81	0.53	0	0	0
CL10197.Contig4_All	10.94	10.65	9.65	6.63	5.74	5.88
CL102.Contig12_All	15.68	14.34	19.4	0	0	0
CL102.Contig13_All	1.35	1.03	0.86	91.7	90.65	91.21
CL102.Contig14_All	0	0.08	0.08	8.42	11.17	6.62
CL102.Contig16_All	9.05	9.03	10.28	0	0	0
CL102.Contig1_All	5.2	4.56	4.59	10.81	11.03	10.64
CL102.Contig2_All	1.05	1.35	0.79	0.41	0.12	0.41
CL102.Contig3_All	3.59	4.98	5.65	15.08	13.77	14.99
CL102.Contig4_All	9.83	10.89	10.75	68.63	68.05	71.14
CL102.Contig5_All	0.33	0.1	0.17	2.92	2.67	2.89
CL102.Contig7_All	3.54	2.22	2.93	0	0	0
CL102.Contig8_All	6.38	6.88	6.66	34.46	40.86	37.28
CL102.Contig9_All	2.54	2.69	2.06	0	0	0
CL1020.Contig12_All	0	0	0.03	0.98	0.79	0.6
CL1020.Contig15_All	2.76	4.12	3.61	0.34	0	0.36
CL1020.Contig1_All	8.31	8.23	8.3	1.9	3.75	2.35
CL1020.Contig2_All	1.26	0.98	1.88	7.14	8.28	9.19
CL1020.Contig3_All	0	0	0	6.15	4.4	5.03
CL10200.Contig2_All	22.32	21.02	20.92	27.55	27.97	29.99
CL10200.Contig3_All	12.01	11.96	11.86	20.46	18.79	19.79
CL10202.Contig1_All	0.39	0.45	0.36	2.04	2.25	2.65
CL10202.Contig2_All	1.64	1.49	1.45	1.16	1.07	0.95
CL10202.Contig4_All	0	0	0	2.05	0.79	0.8
CL10203.Contig2_All	4.51	3.59	3.35	2.65	3.22	2.23
CL10203.Contig3_All	0.53	0.45	0.36	7.65	5.04	4.57
CL10204.Contig1_All	0.32	0.9	0.94	0.22	0	0.18
CL10204.Contig2_All	3.61	4.02	4.85	1.51	2.28	1.14
CL10204.Contig4_All	0.72	0.64	0.59	3.23	3.1	2.96
CL10204.Contig5_All	1.73	1.63	1.92	4.26	3.54	3.87
CL10205.Contig1_All	6.48	7.82	7.64	26.02	26.73	24.27
CL10205.Contig3_All	8.45	8.79	8.19	4.08	4.98	6.32
CL10206.Contig1_All	16.04	17.55	18.04	12.64	11.63	13.04
CL10208.Contig1_All	3.19	3.9	3.15	0	0	0
CL10209.Contig1_All	4.71	3.59	4.06	1.43	1.35	1.99
CL10209.Contig2_All	0.82	1.29	1.13	4.73	4.9	5.55
CL10209.Contig3_All	2.76	2.63	3.46	8.12	7.89	6.93
CL1021.Contig1_All	2.39	1.82	1.38	0.18	0.34	0.76
CL1021.Contig2_All	2.61	1.59	1.9	0.35	0.4	0.7
CL1021.Contig3_All	8.6	9.04	10.46	7.49	8.28	6
CL10210.Contig1_All	16.12	15.85	16.36	24.7	23.15	22.5
CL10210.Contig2_All	60.15	56.9	64.71	55.06	58.69	55.95
CL10210.Contig3_All	91.31	93.15	93.18	81.89	78.48	83.06
CL10211.Contig1_All	2.19	2.06	2.05	1.66	0.77	1.22
CL10216.Contig10_All	1.53	1.7	1.7	11.97	11.99	10.94
CL10216.Contig11_All	3.39	4.53	4.06	0.9	1.05	0.76
CL10216.Contig12_All	1.6	2.04	1.28	1.02	0.9	0.87
CL10216.Contig15_All	0.81	0.83	0.63	0.08	0.09	0
CL10216.Contig16_All	0.43	0.38	0.49	5.21	4.66	4.28
CL10216.Contig17_All	1.43	1.53	1.69	1.33	0.57	0.77
CL10216.Contig18_All	0.27	0.22	0.29	3.41	3.29	3.53
CL10216.Contig19_All	6.98	6.96	7.27	4.5	4.7	4.07
CL10216.Contig1_All	1.44	1.77	2.64	0.08	0.07	0.11
CL10216.Contig20_All	0.72	1.09	0.64	8.83	9.71	7.36
CL10216.Contig26_All	0	0	0	0.76	2.13	2.06
CL10216.Contig4_All	9.27	10.32	9.95	2.47	2.57	2.26
CL10216.Contig5_All	0.44	1.01	0.48	3.36	4.02	4.02
CL10216.Contig6_All	0.68	0.72	0.63	2.15	2.01	2.23
CL10216.Contig7_All	2.68	2.83	2.64	0.49	0.32	0.3
CL10216.Contig8_All	2.97	2.41	3.02	11.36	10.5	11.01
CL10218.Contig1_All	2.13	2.13	1.13	0.61	0.65	1.12
CL10218.Contig2_All	36.19	35.13	38.18	31.45	32.61	30.07
CL1022.Contig2_All	1.81	2.75	1.96	5.87	5.39	5.98
CL1022.Contig3_All	44.28	39.33	44.85	55.57	56.14	57.52
CL1022.Contig4_All	14.1	13.88	15.45	21.08	22.49	18.58
CL1022.Contig5_All	56.93	55.62	55.73	12.97	11.17	11.67
CL1022.Contig6_All	41.25	46.21	48.43	63.59	59.72	61.17
CL10220.Contig14_All	0.15	0	0	0.52	0.58	0.35
CL10220.Contig18_All	0.9	0.65	0.76	0.4	0.39	0.33
CL10220.Contig1_All	1.46	0.73	2.05	0	0	0
CL10220.Contig20_All	0.86	0.63	0	2.37	2	1.6
CL10220.Contig2_All	1.81	2.32	2.74	0.63	0	0.25
CL10220.Contig9_All	0.94	0.59	0.59	0.22	0.08	0.36
CL10221.Contig1_All	0.44	0.51	0.32	2.73	3.19	3.1
CL10222.Contig2_All	0.28	0	0.27	1.66	1.08	1.18
CL10222.Contig3_All	8.08	7.93	7.96	5.93	5.47	4.83
CL10222.Contig4_All	1.75	2.24	2.7	4.16	3.33	4.27
CL10222.Contig5_All	1.07	0.96	1	0.45	0.56	0.74
CL10223.Contig1_All	2.12	2.44	2.6	4.18	5.02	4.42
CL10223.Contig2_All	8.37	9.1	8.11	0.78	0.99	0.81
CL10223.Contig3_All	1.74	1.97	1.62	4.52	4.34	3.93
CL10223.Contig4_All	1.73	2.24	1.28	4.42	3.91	3.28
CL10223.Contig5_All	0.95	0.55	1.04	4.3	4.36	4.25
CL10223.Contig7_All	1.18	1.06	1.79	0.77	0.73	1.11
CL10224.Contig2_All	0.4	1.15	1.04	0	0	0
CL10225.Contig1_All	0	0	0	4.06	4.8	4.53
CL10225.Contig2_All	16.81	19.38	19.83	13.24	9.92	12.48
CL10227.Contig1_All	2.08	1.6	2.14	1.41	1.26	1.25
CL10227.Contig4_All	2.98	1.91	2.3	1.82	1.49	1.55
CL10228.Contig1_All	5.85	7.28	4.73	0	0	0.08
CL10228.Contig2_All	2.13	0	2.77	0	0	0
CL10228.Contig3_All	3.08	2.98	2.46	0	0	0
CL10229.Contig3_All	2.47	2.43	2.96	5.13	5.42	4.68
CL10229.Contig4_All	1.61	1.17	1.39	3.36	3.25	4.39
CL10229.Contig5_All	3.53	3.26	4.18	18.57	18.58	19.2
CL1023.Contig1_All	0	0.85	1.17	2.45	3.66	2.99
CL1023.Contig2_All	3.38	1.43	2.05	0	0	0
CL10230.Contig2_All	4.48	4.78	5.39	11.6	11.75	11.87
CL10230.Contig6_All	2.45	2.75	3.26	4.89	4.13	5
CL10231.Contig1_All	1.53	0.88	0.88	0	0.34	0.58
CL10233.Contig1_All	9.43	8.47	10.2	34.13	35.14	34.49
CL10233.Contig2_All	0	0	0	3.34	3.6	4.71
CL10233.Contig3_All	3.15	4.19	3.62	5.55	5.94	5.33
CL10236.Contig2_All	1.08	1.41	1.61	4.08	3.58	4.73
CL10237.Contig1_All	1.12	1.38	1.54	3.11	2.86	3.56
CL10237.Contig2_All	0.41	0	0.1	2.16	1.8	3.08
CL10238.Contig1_All	0	0	0	2.83	0.41	1.91
CL10238.Contig2_All	3.14	3.65	4.91	1.16	0.92	0
CL10239.Contig2_All	5.03	4.39	4.26	6.27	7.12	6.94
CL1024.Contig1_All	0.57	0.97	0.82	0.39	0.48	0.3
CL1024.Contig3_All	2.63	3.74	3.1	6.42	6.53	5.77
CL1024.Contig4_All	0.5	0.37	0.51	0.15	0	0
CL1024.Contig5_All	1.6	1.41	1.11	0.41	0.41	0.62
CL1024.Contig8_All	0.72	0.26	0.4	0.97	1.56	1.34
CL10241.Contig1_All	3.08	3.66	3.26	6.56	5.8	6.99
CL10241.Contig3_All	2.33	2.23	2.21	5.58	6.82	3.98
CL10242.Contig1_All	0.56	0.29	0.14	2.11	2.14	4.37
CL10243.Contig1_All	0.13	0.13	0.13	2.19	2.47	3.54
CL10245.Contig2_All	3.6	4.37	3.48	2.11	2.01	1.65
CL10247.Contig2_All	33.31	32.27	34.29	0.44	0.4	0.18
CL10247.Contig3_All	95.11	86.65	96.08	89.67	97.04	93.88
CL10249.Contig1_All	0	0	0.13	0.52	0.58	0.75
CL10249.Contig2_All	4.63	4.53	4.05	0.85	0.95	0.62
CL10249.Contig3_All	2.15	2.42	1.96	1.24	0.57	0.86
CL10249.Contig4_All	1.57	1.03	1.23	3.26	3.04	2.37
CL1025.Contig1_All	9.51	10.89	10.74	8.42	7.56	7.31
CL1025.Contig2_All	10.86	9.74	10.54	22.58	26.75	23.73
CL1025.Contig3_All	2.7	2.62	3.03	6	6.34	7.78
CL10250.Contig2_All	1.71	2.38	2.03	0.78	1.15	1.17
CL10250.Contig3_All	0.87	0.67	1.02	2.53	2.96	2.49
CL10251.Contig1_All	1.51	1.47	1.59	3.57	3.05	3.28
CL10253.Contig2_All	1.15	0.65	0.88	17.27	17.97	16.81
CL10256.Contig4_All	26.63	27.41	28.33	18.88	18.9	21.3
CL1026.Contig1_All	1.16	1.36	0.84	0.35	0.27	0.7
CL1026.Contig2_All	0.5	0.44	0.21	1.22	1.42	1.09
CL10260.Contig4_All	2.31	2.26	2.47	0.8	0.87	0.53
CL10261.Contig1_All	0.59	0.6	0.3	0.16	0.04	0.1
CL10263.Contig1_All	1.01	0.2	1.71	0	0	0.03
CL10263.Contig3_All	4.64	4.83	4.78	8.29	7.49	8.12
CL10263.Contig4_All	5.08	5.61	5.31	4.16	4.45	3.28
CL10264.Contig1_All	0	0.24	0	2.72	2.94	1.5
CL10264.Contig2_All	0	0.15	0.13	2.23	2.09	2.22
CL10264.Contig3_All	2.66	3.01	2.88	1.2	1.26	1.66
CL10265.Contig2_All	4.66	3.5	4.66	1.77	1.42	1.25
CL10267.Contig1_All	0.66	2.04	2.06	0	0	0
CL10268.Contig1_All	0.56	0.82	0.55	0.17	0	0.06
CL10268.Contig2_All	2.29	2.64	2.27	0.5	0.45	0.4
CL1027.Contig1_All	0.21	0	0.12	2.19	2.76	2.6
CL1027.Contig2_All	3.07	4.39	4.85	6.31	7.74	7.8
CL1027.Contig4_All	3.41	4.65	5.09	3.16	3.57	2.85
CL10271.Contig1_All	31.41	32.57	33.89	9.64	9.79	9.37
CL10271.Contig2_All	15.93	16.07	15.91	8.29	7.79	7.97
CL10271.Contig3_All	1.07	0.81	1.21	7.85	8.35	8.7
CL10271.Contig4_All	0.05	0	0.2	1.04	0.39	0.68
CL10271.Contig5_All	39.61	41.14	38.96	38.16	41.6	40.87
CL10272.Contig2_All	3.91	4.71	3.23	2.4	1.11	0.47
CL10273.Contig3_All	6.85	9.23	8.93	13.09	11.87	12.76
CL10273.Contig5_All	22.56	27.8	27.13	10.05	9.53	8.64
CL10274.Contig1_All	3.22	3.19	3.2	4.75	5.82	6.58
CL10274.Contig2_All	0	0	0	1.38	2.41	0.83
CL10275.Contig2_All	12.54	12.32	14.18	5.75	3.64	4.57
CL10275.Contig5_All	15.25	18	14.62	22.86	25.14	25.61
CL10276.Contig2_All	12.61	11.72	12.67	9.42	9.74	9.9
CL10276.Contig3_All	27.73	28.66	26.01	27.6	28.13	27.45
CL10277.Contig1_All	3.43	3.79	4.2	6.21	5.76	7.09
CL10277.Contig2_All	10.62	10.42	10.56	9.25	9.29	10.08
CL10277.Contig3_All	6.63	6.44	7.22	10.44	9.4	11.37
CL10277.Contig5_All	8.52	9.68	9.33	4.98	4.5	6.47
CL10279.Contig1_All	5.88	7.36	7.01	9.43	10.93	10.55
CL10279.Contig2_All	10.6	12.19	12.9	15.57	18.34	16.95
CL1028.Contig1_All	3.03	3.04	2.63	1.17	1.2	1.59
CL10280.Contig2_All	12.31	13.91	12.74	9.07	9.36	9.32
CL10280.Contig4_All	8.78	8.48	11.07	8.35	6.71	8.26
CL10281.Contig4_All	0.71	0.14	1.44	0.16	0.05	0.05
CL10285.Contig2_All	1.91	1.97	2.77	0.84	0.34	0.12
CL10287.Contig1_All	1.81	1.53	2.34	4.48	3.92	4.74
CL10287.Contig2_All	1.67	0.84	1.74	0.83	0.63	0.5
CL10287.Contig3_All	0.79	0.44	0.47	1.42	1.38	1.44
CL10288.Contig3_All	4.38	4.56	3.95	1.88	1.9	2.67
CL10289.Contig1_All	2.71	2.22	2.08	1.37	1.88	1.6
CL10289.Contig2_All	0.04	0.02	0.02	2.85	2.8	2.55
CL10289.Contig3_All	5.22	5.84	5.38	1.58	1.47	1.12
CL10291.Contig2_All	14.02	13.14	14.82	8.46	8.62	10.68
CL10291.Contig3_All	7.59	7.62	5.84	5.49	6	6.91
CL10292.Contig2_All	2.43	4.89	3.44	6.47	6.25	7.15
CL10292.Contig3_All	0.12	0.28	0.21	0.91	0.8	1.27
CL10292.Contig4_All	1.22	0	0.64	0	0	0
CL10292.Contig5_All	3.51	3.87	3.97	0.42	0.47	0.57
CL10292.Contig6_All	9.24	9.22	7.49	7.96	6.35	7.39
CL10294.Contig2_All	1.52	1.39	0.89	0.22	0.1	0
CL10295.Contig1_All	0.33	0.12	0	0.93	0.92	0.98
CL10295.Contig5_All	5.91	7.54	6.88	3.01	3.46	3.67
CL10297.Contig1_All	8.2	9.98	9.63	13.55	15.21	14.61
CL103.Contig2_All	4.11	4.54	4.02	0.63	0.7	0.97
CL103.Contig5_All	0.1	0	0.3	0.68	1.75	0.9
CL103.Contig6_All	1.18	0.35	0.53	0	0	0
CL103.Contig7_All	1.14	1.5	1.56	0.12	0.13	0.17
CL103.Contig8_All	0.7	0.76	0.71	0.25	0.34	0.15
CL1030.Contig2_All	1.2	1.19	1.45	2.05	2.14	2.29
CL1030.Contig5_All	1.17	1.57	1.11	0.57	0.55	0.39
CL1030.Contig6_All	0.27	0.29	0.34	2.1	1.48	1.5
CL1030.Contig8_All	2.28	2.32	2.92	1.2	0.63	0.58
CL1030.Contig9_All	0.14	0	0	2.13	2.21	1.67
CL10300.Contig1_All	0.37	0.5	0.31	2.8	2.65	2.76
CL10300.Contig2_All	0	0.3	0	2.15	2.08	1.36
CL10300.Contig4_All	4.6	5.14	4.75	2.71	2.17	2.84
CL10301.Contig1_All	12.68	15.25	14.75	9.51	9.54	10.92
CL10303.Contig1_All	5.33	5.34	5.12	2.68	3.2	3.59
CL10304.Contig1_All	0	0	0	1.64	3.08	1.16
CL10305.Contig2_All	0	0	0	0.5	0.35	0.14
CL10305.Contig6_All	1.16	1.59	1.56	3.46	2.5	2.38
CL10308.Contig1_All	0	0.13	0	2.03	2.15	2.76
CL10308.Contig4_All	0.93	0.99	1.56	3.21	3.52	4.15
CL10309.Contig1_All	11.27	9.16	12.71	6.18	7.61	7.53
CL10309.Contig3_All	7.95	8.66	8.83	0.56	0.48	0.64
CL1031.Contig10_All	116.82	121.44	136.49	83.29	83.27	92.29
CL1031.Contig12_All	31.63	29.79	30.24	1.97	2.48	2.08
CL1031.Contig13_All	280.89	290.17	303.69	166.57	176.57	165.33
CL1031.Contig15_All	4.36	5.05	4.59	25.76	27.4	27.27
CL1031.Contig16_All	170.66	171.8	179.21	456.17	443.82	476.69
CL1031.Contig17_All	18.49	15.08	16.73	25.01	24.66	25.68
CL1031.Contig18_All	79.52	78.78	74.27	9.2	5.86	5.26
CL1031.Contig19_All	93.66	81.92	92.28	4.67	3.56	4.7
CL1031.Contig1_All	0.13	0.17	0.14	1.83	1.45	1.68
CL1031.Contig20_All	137.44	151.9	162.25	42.79	40	44.08
CL1031.Contig21_All	21.09	20.99	18.97	26.19	27.13	27.57
CL1031.Contig22_All	203.64	223.62	220.99	232.36	220.77	230.23
CL1031.Contig23_All	2.33	2.05	1.96	1.07	1.51	1.82
CL1031.Contig24_All	347.14	344.39	361.49	359.52	347.99	371.31
CL1031.Contig2_All	0.53	0.62	0.85	5.82	5.57	4.67
CL1031.Contig3_All	0	0.04	0	17.04	15.47	13.65
CL1031.Contig4_All	3.28	4.51	6.12	0.94	1.26	1.49
CL1031.Contig5_All	301.85	304.62	296.45	59.46	60.16	57.04
CL1031.Contig6_All	44.11	45.91	45.91	39.41	34.86	41.44
CL1031.Contig7_All	118.67	117.43	121.05	75.49	71.18	74.84
CL1031.Contig8_All	12.46	11.31	14.24	9.81	10.01	10.78
CL1031.Contig9_All	6.6	8.15	7.06	16.96	16.36	15.8
CL10310.Contig3_All	0.85	0.6	0.44	0.21	0.05	0
CL10312.Contig1_All	3.47	2.6	2.9	1.47	1.47	1.27
CL10312.Contig2_All	3.59	3.38	3.6	6.02	6.74	6.17
CL10313.Contig10_All	0	0.01	0	0.16	0.26	0.14
CL10314.Contig1_All	1.2	0.77	1.05	0.49	0.36	0.1
CL10314.Contig2_All	0.94	1.33	2.8	3.25	3.08	5.5
CL10314.Contig4_All	14.44	16.57	15.81	81.99	90.02	87.88
CL10314.Contig5_All	38.66	42.38	41.57	11.48	8.62	10.26
CL10315.Contig3_All	8.66	10.19	8.09	4.28	3.92	4.59
CL10315.Contig5_All	7.25	8.3	9.58	5.35	6.49	6.21
CL10317.Contig1_All	18.53	16.84	16.64	1.01	1.19	1.16
CL10317.Contig2_All	8.65	9.62	9.44	22.81	23.49	22.94
CL10317.Contig3_All	0.09	0.09	0.35	7.55	7.15	7.17
CL10318.Contig2_All	0	0.1	0.39	2.85	2.11	2.66
CL10318.Contig3_All	0.16	0.1	0.06	0.55	1.16	0.6
CL10318.Contig5_All	1.95	1.54	1.81	2.75	2.88	3.36
CL1032.Contig1_All	0.84	1.2	0.76	15.34	16.9	14.83
CL1032.Contig3_All	21.21	19.36	20.06	15.63	16.75	15.06
CL10320.Contig2_All	3.45	4.92	3.37	10.38	10.5	7.81
CL10320.Contig4_All	1.68	2.5	1.99	6.67	7.04	7.62
CL10321.Contig3_All	1.24	1.51	1.73	3.4	2.6	3.36
CL10322.Contig2_All	3.73	3.71	3.91	3.03	2.4	3.03
CL10323.Contig1_All	0.03	0.15	0.15	3.13	2.05	2.2
CL10323.Contig3_All	2.37	4.14	2.76	12.69	10.48	9.66
CL10324.Contig1_All	13.44	13.88	13.72	34.56	35.44	31.55
CL10324.Contig2_All	32.26	32.59	33.28	8.95	10.71	10.37
CL10324.Contig3_All	1.68	2.23	1.69	6.79	7.59	8.36
CL10325.Contig2_All	0.51	0.25	0.5	2.17	1.28	1.33
CL10325.Contig3_All	0.07	0.1	0	0.64	0.68	1.19
CL10326.Contig2_All	1.43	0.96	0.44	3.73	4.03	2.84
CL10329.Contig1_All	0.5	0.38	0.38	0	0	0
CL10329.Contig2_All	0	0	0.05	0.71	0.59	1.02
CL10329.Contig3_All	1.33	0.96	0.96	0	0	0
CL10329.Contig4_All	0.89	1.27	1.27	5	4.58	4.06
CL10329.Contig6_All	2.13	2.13	2.15	0	0	0.15
CL1033.Contig1_All	1.6	1.3	0.91	3.67	3.27	2.78
CL1033.Contig2_All	7.92	9.16	7.58	5.4	5.75	4.84
CL1033.Contig3_All	3.04	3.24	1.56	1.02	1.55	1.08
CL1033.Contig4_All	19.53	19.2	19.33	14.22	13.08	14.15
CL1033.Contig5_All	11.83	12.2	12.96	4.49	5	4.4
CL1033.Contig6_All	8.03	8	8.35	10.63	10.28	10.88
CL10330.Contig5_All	12.81	12.78	12.55	12.67	11.89	12.89
CL10331.Contig1_All	15.78	17.65	15.72	6.14	5.91	7.28
CL10331.Contig3_All	23.74	25.64	24.34	37.85	36.55	38.87
CL10332.Contig2_All	6.13	8.13	6.34	0.51	0.73	0.6
CL10332.Contig3_All	0.32	0.33	0.16	5.28	5.47	5.33
CL10335.Contig2_All	1.25	0.91	0.31	6.21	4.94	4.41
CL10335.Contig4_All	9.21	9.56	8.99	7.99	9.24	8.41
CL10336.Contig2_All	1.06	1.39	1.31	2.35	2.16	1.96
CL10337.Contig3_All	0.48	0.24	0.4	0	0	0.05
CL10337.Contig5_All	0.23	0.31	0.38	0.07	0.04	0.02
CL10337.Contig7_All	2.48	1.34	2.59	1.17	0.48	1.44
CL10338.Contig1_All	6.6	7.56	8.2	0.54	0.47	0.47
CL10338.Contig2_All	2.38	2.3	2.9	4.86	3.89	4.44
CL10339.Contig2_All	0.94	0.93	1.06	2.74	2.75	2.51
CL1034.Contig10_All	2.63	2.76	2.28	1.45	1.54	1.91
CL1034.Contig12_All	0	0	0	0	0.08	0.2
CL1034.Contig13_All	0	0	0	0.27	0.5	0
CL1034.Contig15_All	2.06	2.74	2.35	4.27	4.36	3.71
CL1034.Contig16_All	2.6	2.11	3.41	0.14	0	0
CL1034.Contig17_All	1.14	0.77	0.81	3.89	3.05	3.75
CL1034.Contig19_All	1.39	0.81	0.68	6.46	5.35	6.23
CL1034.Contig1_All	0.07	0.02	0.15	0.76	0.67	0.61
CL1034.Contig20_All	0.31	0.2	0.25	2.81	2.07	2.03
CL1034.Contig21_All	0.19	0.23	0.29	0.06	0.04	0
CL1034.Contig2_All	1.07	1.49	1.63	2.65	1.91	2.5
CL1034.Contig3_All	1.34	1.11	1.27	2.8	2.5	2.84
CL1034.Contig5_All	1.88	2.85	2.29	4.1	5.31	5.71
CL10340.Contig1_All	3.06	2.1	1.75	0.97	1.5	0.88
CL10341.Contig2_All	0.33	0.47	0.67	1.67	1.46	1.78
CL10343.Contig2_All	4.16	2.07	2.9	0.22	1.57	0
CL10344.Contig2_All	2.53	2	1.9	0.32	0.2	0.32
CL10344.Contig3_All	0.1	0.11	0.23	2.74	2.29	2.49
CL10344.Contig5_All	0.24	0.14	0.09	2.13	1.09	0.95
CL10345.Contig2_All	2.74	3.67	7.07	2	2.23	0
CL10346.Contig1_All	0.68	0.68	0.5	2.14	1.85	0.97
CL10346.Contig2_All	2.44	2.01	2.57	1.72	1.06	1.15
CL10346.Contig4_All	2.74	0.33	1.97	0	0	0
CL10346.Contig6_All	1.59	1.27	1.44	0.77	0.59	0.51
CL10346.Contig7_All	2.62	2.76	2.49	1.28	1.19	1.71
CL10347.Contig3_All	5.54	6.84	5.84	5.16	4.5	4.49
CL10348.Contig2_All	5.2	5.46	4.1	2.62	1.69	1.58
CL10348.Contig3_All	2.4	3.59	3.74	6.2	4.82	5.74
CL10349.Contig3_All	1.36	1.25	0.7	3.14	2.51	2.03
CL1035.Contig1_All	2.35	2.52	4.19	0.3	0.56	0.3
CL1035.Contig6_All	0.75	0.65	1.06	22.73	25.23	23.14
CL1035.Contig7_All	5.81	4.36	5.53	13.06	14.19	12.91
CL10351.Contig1_All	0.4	0	0.6	3.45	2.98	2.89
CL10351.Contig4_All	4.43	4.63	4.54	5.84	7.85	9.28
CL10353.Contig1_All	2.29	2.63	2.28	4.16	3.94	3.63
CL10353.Contig4_All	2.41	2.08	2.64	1.84	1.84	1.52
CL10354.Contig2_All	7.3	8.66	5.02	1.81	2.38	1.53
CL10355.Contig2_All	0	0.34	0.09	1.26	1.05	0.46
CL10355.Contig3_All	0.21	0.66	0.15	1.87	1.04	1.23
CL10355.Contig4_All	2.42	2.37	2.29	0	0	0.05
CL10355.Contig5_All	0.94	1.06	0.66	0.3	0.06	0.6
CL10356.Contig1_All	0.54	0.26	0	3.11	3.7	1.8
CL10358.Contig1_All	0.78	0.91	0.59	1.72	1.94	1.32
CL10359.Contig2_All	6.28	6.6	5.99	0.08	0.07	0.13
CL1036.Contig1_All	0.18	0.26	0.35	1.45	1.22	1.27
CL1036.Contig2_All	0.25	0.19	0.23	1.9	1.59	1.9
CL10360.Contig1_All	22.66	18.08	21.03	4.06	3.06	4.03
CL10360.Contig6_All	25.94	27.1	23.29	10.06	13.06	8.09
CL10360.Contig7_All	0	0	0	28.11	24.12	20.17
CL10361.Contig10_All	0.16	0.22	0.16	0	0.01	0
CL10361.Contig14_All	1.06	1.11	1.29	0.87	0.78	0.82
CL10361.Contig16_All	0.13	0.25	0	0.46	0.73	0.72
CL10361.Contig2_All	1.35	1.59	0.86	0.68	0.63	0.7
CL10361.Contig6_All	0.69	0.62	0.92	0.33	0.31	0.37
CL10361.Contig8_All	0.38	0.44	0.41	0.73	0.9	1.06
CL10361.Contig9_All	0.04	0.08	0.14	0.4	0.47	0.6
CL10363.Contig2_All	0.12	0.29	0	0.92	0.88	0.48
CL10363.Contig3_All	1.33	1.78	1.48	2.83	2.53	3.54
CL10364.Contig1_All	0.66	1.07	1.15	2.04	2.01	2.15
CL10365.Contig1_All	0.87	1.99	1.81	2.86	3	3.17
CL10365.Contig2_All	0.11	0.06	0	0.82	0.34	0.41
CL10366.Contig1_All	0.42	0.43	0.86	3.64	2.62	3.27
CL10366.Contig2_All	2.79	1.8	2.28	6.25	6.94	6.06
CL10367.Contig1_All	3.44	3.9	3.75	5.26	5.87	6
CL10367.Contig2_All	5.58	6.09	5.58	9.02	7.66	8.54
CL10369.Contig1_All	6.81	5.95	5.69	5.62	4.62	4.83
CL10369.Contig2_All	10.71	10.73	10.6	14.33	14.64	15.16
CL1037.Contig4_All	0.58	0.5	0	0	0	0
CL10371.Contig1_All	0.61	0.74	0.94	1.56	1.79	1.32
CL10371.Contig2_All	1.51	1.7	0.87	4.15	3.02	3.45
CL10371.Contig5_All	7.1	10	9.86	5.09	5.72	5.54
CL10373.Contig2_All	0.16	0.09	0.29	2.16	1.91	1.85
CL10373.Contig3_All	4.47	4.59	3.62	1.61	2.01	1.95
CL10374.Contig1_All	2.61	2.35	1.73	1.29	0.61	0.65
CL10374.Contig2_All	2.99	2.42	2.68	9.47	9.85	10.38
CL10374.Contig3_All	2.99	3.06	2.95	0.62	1.04	0.72
CL10376.Contig2_All	3.91	3.68	3.64	7.72	7.81	7.02
CL10376.Contig3_All	4.18	4.41	4.58	6.91	6.6	6.28
CL10377.Contig1_All	1.02	0.94	1.19	1.28	3.04	2.53
CL10377.Contig2_All	0.54	0.56	0.42	2.46	1.78	1.35
CL10377.Contig4_All	1.27	1.64	0.98	3.36	2.47	3.65
CL10379.Contig1_All	12.88	12.03	12.12	5.74	6.37	5.82
CL10379.Contig3_All	4.95	4.67	4.56	1.75	1.33	1.88
CL10379.Contig5_All	8.86	8.4	7.95	5.06	4.05	3.74
CL10379.Contig6_All	1.63	1.69	1.93	5.99	7.14	6.19
CL1038.Contig2_All	0.7	0.68	0.7	3.02	2.43	2.49
CL1038.Contig3_All	1.19	1.25	1.34	3.43	3.06	3.03
CL1038.Contig4_All	1.56	1.25	1.21	3.46	3.93	4.22
CL1038.Contig5_All	1.65	1.42	1.51	5.49	5.39	5.4
CL10380.Contig2_All	0	0	0	1.37	1.09	0.47
CL10382.Contig1_All	4.93	6.68	6.32	4.22	4.61	4.44
CL10382.Contig2_All	0.76	0.75	0.64	1.72	1.61	1.68
CL10382.Contig4_All	0.64	0.83	0.85	1.66	2.21	1.97
CL10385.Contig1_All	3.7	3.98	3.33	1.19	1.23	1.03
CL10386.Contig3_All	19.96	20.23	30.12	19.68	24.58	18.12
CL10387.Contig2_All	1.86	2.68	2.91	0	0	0.1
CL10388.Contig2_All	0	0	0	1.01	0.94	0.7
CL10388.Contig3_All	0.11	0	0	0.38	1.31	1.13
CL10388.Contig4_All	1.75	1.85	2.13	0	0.26	0
CL10389.Contig1_All	6.6	5.25	5.67	4.77	5.14	4.79
CL10389.Contig2_All	2.62	3.38	3.96	2.09	1.64	1.64
CL10389.Contig4_All	1.44	0.55	1.08	2.35	3.19	3.08
CL1039.Contig1_All	0	0.45	0.21	15.13	14.37	15.1
CL1039.Contig2_All	73.9	74.97	73.08	57.78	55.61	57.72
CL1039.Contig3_All	58.14	56.01	53.21	52.06	53.17	51.79
CL1039.Contig4_All	54.1	51.03	52.59	24.63	25.66	25.07
CL10394.Contig1_All	1.73	1.93	1.74	1.12	0.83	0.35
CL10394.Contig2_All	1.09	1.82	1.8	0.53	0.42	0.64
CL10395.Contig1_All	0.46	0.24	0.17	2.58	2.6	2.84
CL10395.Contig4_All	2.24	2	2.91	1.46	0.98	1.04
CL10395.Contig5_All	7.56	6.58	8.38	4.55	5.51	5.42
CL10396.Contig1_All	0	0	0	1.27	2.98	1.5
CL10396.Contig2_All	0.41	0.42	0.35	2.17	1.61	1.49
CL10396.Contig3_All	0.26	0	0.74	3.5	3.34	4.1
CL10397.Contig2_All	6.21	6.7	6.32	5.54	5.94	5.59
CL10398.Contig3_All	2.96	2.1	3.41	5.98	6.05	5.58
CL10398.Contig4_All	4.34	3.75	6.02	2.51	2.15	1.51
CL104.Contig10_All	0.08	0.04	0	1.3	1.32	1.54
CL104.Contig13_All	7.75	9.4	10.69	8.8	6.91	6.2
CL104.Contig14_All	3.35	2.22	3.74	6.16	5.39	5.58
CL104.Contig16_All	7.27	7.28	7.32	5.1	5.07	4.63
CL104.Contig17_All	6.55	7.43	6.95	7.38	5.5	6.41
CL104.Contig3_All	0	0	0	0.39	0.16	0.36
CL104.Contig4_All	0.88	1.03	0.67	2.31	3.21	2.3
CL104.Contig5_All	1.05	1.14	1.71	0.26	0.1	0.12
CL104.Contig6_All	12.53	11.84	13.06	6.77	7.08	7.49
CL1040.Contig10_All	35.84	36.79	34.56	14.48	13.03	14.27
CL1040.Contig11_All	39.46	41.8	42.9	15.77	18.27	18.14
CL1040.Contig12_All	49.22	51.98	54.37	24.75	23.68	22.76
CL1040.Contig1_All	0.33	0	0	10.58	12.3	11.41
CL1040.Contig2_All	0	0	0	2.06	2.24	1.11
CL1040.Contig4_All	9.69	10.17	10.5	2.27	2.28	2.49
CL1040.Contig5_All	0.77	1.08	1.02	2.41	2.05	2.63
CL1040.Contig6_All	4.35	4.34	4.35	8.15	8.59	10.39
CL1040.Contig7_All	2.48	2.29	2.43	6.83	6.92	7.47
CL1040.Contig9_All	16.2	16.45	14.91	5.77	8.35	6.45
CL10400.Contig2_All	2.71	3.59	3.36	5.69	5	6.65
CL10400.Contig3_All	0.46	0.48	0.79	1.53	1.05	1.44
CL10400.Contig5_All	1.1	0.36	1.84	13.79	14.89	16.47
CL10401.Contig1_All	0	0	0.08	1.98	1.71	1.73
CL10401.Contig4_All	0.62	0.55	0.68	2.07	1.91	1.67
CL10401.Contig6_All	0.9	1.06	0.84	4.16	4.28	4.7
CL10402.Contig2_All	4.2	5.11	4.55	4.19	3.76	3.75
CL10402.Contig4_All	4.46	4.21	4.54	2.76	1.59	3.68
CL10402.Contig6_All	4.17	3.59	4.23	6.98	5.92	8.02
CL10403.Contig1_All	6.51	6.61	6.02	0	0.67	0.38
CL10403.Contig2_All	4.14	2.76	2.75	0.78	0.5	0.94
CL10404.Contig1_All	6.12	5.85	6.01	5.08	4.55	3.98
CL10405.Contig1_All	0	0	0	0.63	0.47	0.79
CL10405.Contig2_All	1.45	1.52	0.65	0	0	0
CL10406.Contig1_All	4.06	3.99	3.75	2.56	2.96	3.54
CL10406.Contig2_All	2.87	3.59	2.51	4.63	4.72	4.59
CL10406.Contig3_All	2.29	3.04	3.77	0.89	0.67	0.83
CL10406.Contig5_All	2.25	2.24	1.64	0.34	0.2	0.65
CL10406.Contig6_All	13.07	13.49	13.5	9.87	10.23	10.78
CL10408.Contig2_All	3.96	3.06	4.23	5.98	6.54	5.35
CL10408.Contig3_All	9.73	9.78	8.48	6.01	7.24	8.1
CL10409.Contig3_All	1.82	1.55	1.62	3.24	5.29	4.64
CL1041.Contig4_All	4.06	4.57	4.59	2.91	2.2	2.68
CL10410.Contig1_All	0.46	0.31	0.61	0	0	0.06
CL10410.Contig2_All	1.01	1.3	0.53	1.81	2.77	1.78
CL10411.Contig2_All	2.97	4.28	4.5	7.74	6.32	7.21
CL10411.Contig4_All	0.41	0.52	0.48	1.22	1.47	1.03
CL10411.Contig6_All	2.9	3.16	2.64	8.54	9.17	8.53
CL10413.Contig2_All	0.33	0.81	0.71	4.07	2.83	4.69
CL10413.Contig4_All	0.23	0.42	0.22	1.97	1.35	2.72
CL10415.Contig2_All	1.9	2.6	1.12	6.16	4.29	6.76
CL10415.Contig3_All	3.16	3.49	3.38	11.62	11.04	11.22
CL10416.Contig2_All	10.95	10.16	11.19	8.43	9.74	9.72
CL10419.Contig1_All	1.31	0.58	1.09	2.16	2.62	2.25
CL10419.Contig2_All	0.16	0.17	0.17	1.32	2.31	2
CL1042.Contig5_All	0.09	0	0.18	2.5	3.15	2.25
CL1042.Contig6_All	0.54	0.57	0.54	1.74	1.24	1.25
CL1042.Contig7_All	4.61	4.65	5.04	3.17	2.99	3.54
CL10420.Contig4_All	1.34	2.2	2.05	4.49	4.3	4.99
CL10421.Contig2_All	2.59	2.09	2.59	1.62	1.27	1.39
CL10421.Contig3_All	2.11	1.96	1.82	3.49	2.93	3.01
CL10423.Contig2_All	11.01	8.88	10.4	15.37	16.75	18.45
CL10424.Contig1_All	1.37	1.07	1.25	3.37	3.89	3.71
CL10426.Contig1_All	1.34	1.16	1.51	0	0.08	0.08
CL10427.Contig4_All	2.1	1.92	2.18	3.62	2.87	3.14
CL10428.Contig3_All	1.27	0.75	1.17	3.34	2.81	3.06
CL10430.Contig1_All	0.96	2.32	0.96	0	0	0.18
CL10431.Contig1_All	6.98	9.02	7.28	3.61	3.09	2.97
CL10431.Contig2_All	2.25	0.87	1.16	16.12	14.05	13.68
CL10431.Contig3_All	9.16	8.66	9.04	0.84	0.81	0.58
CL10431.Contig4_All	6.81	6.46	6.08	19.66	19.15	19.26
CL10431.Contig5_All	33.12	33.75	29.22	44.25	46.04	49.91
CL10432.Contig1_All	9.7	11.76	11.17	19.33	20.3	19.29
CL10432.Contig2_All	9.21	9.51	9.32	7.67	7.51	8.8
CL10435.Contig1_All	0.23	0.85	1.25	4.51	3.47	3.81
CL10435.Contig3_All	0.97	1.18	0.83	0.06	0.18	0.17
CL10436.Contig2_All	0.9	1.09	0.89	3.12	2.68	3.33
CL10436.Contig3_All	2.15	2.82	2.67	8.25	8.82	7.85
CL10437.Contig1_All	107.87	100.14	101.3	104.79	108.11	100.25
CL1044.Contig1_All	0.25	0.58	0.34	4.98	3.85	5.68
CL1044.Contig2_All	0.64	0.34	0.39	4.09	3.24	4.07
CL1044.Contig4_All	2.48	2.71	1.9	7.97	6.6	7.15
CL1044.Contig5_All	1.25	0.9	0.83	5.92	5.92	4.84
CL1044.Contig6_All	1.2	1.19	1.09	2.42	2.26	2.46
CL1044.Contig7_All	1.69	1.79	2.04	6.48	7.08	7.18
CL1044.Contig8_All	4.48	4.07	3.32	7.63	8.07	6.43
CL10440.Contig1_All	4.01	4.86	5.57	1.86	4.07	1.78
CL10440.Contig2_All	5.16	3.82	5.81	10.66	11.69	8.06
CL10441.Contig7_All	3.44	3.21	3.83	2.52	1.74	2.41
CL10441.Contig8_All	1.95	2.24	1.95	1.36	1.66	1.03
CL10444.Contig1_All	2.03	1.89	1.69	0.39	0.69	0.59
CL10444.Contig4_All	0.33	0.55	0.43	1.44	1.3	1.49
CL10444.Contig5_All	4.49	4.61	4.92	9.67	9.06	9.65
CL10444.Contig7_All	6.65	6.64	6.21	11.66	10.72	10.53
CL10444.Contig8_All	3.74	3.67	3.84	5.23	5.12	5.5
CL10444.Contig9_All	0.15	0.22	0.18	0.98	0.57	1.14
CL10445.Contig4_All	0	0	0.01	1.46	1.4	0.97
CL10445.Contig7_All	0.07	0	0.04	0.56	0.62	0.29
CL10445.Contig8_All	0.18	0.13	0.16	0.95	0.82	0.97
CL10447.Contig1_All	3.66	3.93	5.27	8.1	8.86	7.97
CL10447.Contig2_All	24.45	25.37	27.1	20.18	20.31	20.23
CL10447.Contig6_All	3.54	5.91	5.76	9.08	10.28	9.65
CL10448.Contig1_All	0.86	1.6	0.87	7.68	6	6.82
CL10448.Contig2_All	0.97	0.93	1.15	6.54	5.88	6.77
CL10448.Contig3_All	26.33	24.27	23.91	10.12	11.37	10.82
CL10448.Contig4_All	0.42	1.37	0.35	1.79	3.45	4.94
CL1045.Contig11_All	2.95	3.39	2.48	2.09	1.77	1.3
CL1045.Contig1_All	4.67	4.06	2.02	0	0	0
CL1045.Contig3_All	4.69	4.91	5.05	1.09	1.45	1.05
CL1045.Contig8_All	5.32	3.62	4.77	2.38	3.32	2.98
CL10450.Contig1_All	1.25	2.08	1.75	0.28	0.36	0.21
CL10450.Contig2_All	4.22	4.3	3.77	1.07	1.32	0.96
CL10450.Contig4_All	5.64	5.88	5.93	9.07	8.89	10.12
CL10451.Contig2_All	115.06	123.5	118.33	153.22	153.4	162.28
CL10452.Contig1_All	4.88	3.73	3.89	6.55	7.97	8.12
CL10452.Contig2_All	26.26	24.91	23.64	22.94	22.46	23.78
CL10454.Contig1_All	0.72	0.56	0.57	2.54	3.95	3.72
CL10454.Contig3_All	2.7	4.09	3.17	6.09	5.07	5.34
CL10454.Contig4_All	1.67	1.79	1.77	0	0	0
CL10454.Contig6_All	2.36	2.81	3.77	4.43	7.07	4.06
CL10454.Contig7_All	21.44	20.91	22.81	19.32	20.81	20.77
CL10455.Contig1_All	0	0	0	0.24	0.9	0.49
CL10456.Contig1_All	0	0	0	0.37	0.27	0.88
CL10456.Contig2_All	0.19	0.19	0.09	1.08	0.53	1.31
CL10457.Contig2_All	5.53	4.54	5.67	4.07	4.39	3.94
CL10457.Contig3_All	11.78	11.55	13.98	5.17	5.93	4.65
CL10458.Contig4_All	6.82	7	6.91	4.09	5	3.12
CL10458.Contig5_All	9.02	7.68	10.55	3.57	2.98	5.91
CL10458.Contig6_All	8.8	10.9	7.58	3.89	5.34	3.5
CL10459.Contig2_All	0	0	0	0.79	0.58	0.99
CL10459.Contig3_All	1.32	1.35	0.81	0	0	0
CL1046.Contig1_All	107.4	105.61	98.46	77.1	77.92	74.13
CL1046.Contig2_All	100.68	97.81	92.05	69.7	76.94	62.14
CL1046.Contig3_All	14.57	17.28	21.63	11.42	10.98	9.53
CL1046.Contig4_All	5.73	4.53	5.22	2.4	2.74	1.56
CL10460.Contig3_All	1.98	2.52	1.91	1.58	1.57	1.34
CL10463.Contig2_All	0	0.2	0	1.18	1.98	1.47
CL10463.Contig3_All	2.19	1.82	1.86	6.74	5.08	7.57
CL10464.Contig1_All	1.7	1.89	1.5	0.76	0.46	0.52
CL10464.Contig4_All	18.06	20.28	18.57	3.24	3.54	3.44
CL10464.Contig5_All	2.08	1.93	1.59	1.2	0.98	0.91
CL10465.Contig1_All	19.04	19.05	23.39	35.09	38	34.43
CL10465.Contig2_All	48.72	52.56	47.82	28.59	32.72	33.31
CL10466.Contig1_All	10.27	9.72	9.65	6.86	6.08	6.12
CL10466.Contig2_All	1.03	1.27	1.59	8	8.81	8.89
CL10467.Contig3_All	6.52	7.53	7.42	1.73	1.95	1.42
CL10467.Contig4_All	0.32	0.23	0.15	1.02	1.05	1.32
CL10467.Contig5_All	0.62	0.66	2.33	0	0	0
CL10468.Contig1_All	11.23	11.13	10	7.65	7.95	6.28
CL10468.Contig2_All	6.82	6.99	6.89	13.07	14.5	14.27
CL10469.Contig2_All	1.54	2.13	1.99	5.88	5.95	5.52
CL10469.Contig3_All	1.52	1.45	2.04	2.6	4.46	3.53
CL10469.Contig5_All	19.82	21.98	18.99	3.01	1.74	2.69
CL1047.Contig1_All	1.31	0.33	0.99	6.05	4.97	4.35
CL1047.Contig2_All	37.9	40.9	39.41	15.75	15.39	15.56
CL1047.Contig3_All	5.46	5.63	6.22	22.86	21.04	23.05
CL1047.Contig4_All	4.18	3.81	3.71	2.5	2.49	2.4
CL1047.Contig7_All	6.01	7.7	6.73	17.87	18.41	18.72
CL1047.Contig8_All	0.19	0.08	0.13	1.41	1.62	1.7
CL1047.Contig9_All	3.05	2.7	3.16	8.18	6.9	7.74
CL10470.Contig1_All	0	0	0	0.61	0.55	0.43
CL10470.Contig7_All	0.57	0.99	1.47	0.09	0.16	0.15
CL10470.Contig8_All	1.49	0.88	1.52	0.66	0.6	0.74
CL10471.Contig1_All	1.87	1.25	1.27	0	0.18	0.39
CL10471.Contig2_All	0.84	1.58	1.27	3.31	3.7	3.9
CL10473.Contig2_All	1.76	1.65	2.48	0.9	1.31	0.96
CL10474.Contig1_All	0.38	0.49	0.8	3.55	5.41	4.76
CL10474.Contig3_All	0.09	0	0.06	0.91	0.74	0.57
CL10474.Contig4_All	7.52	5.16	5.74	0.83	0.72	0.6
CL10476.Contig1_All	0.23	0	0	3.09	2.31	0.99
CL10476.Contig2_All	43.23	49.64	47.7	37.99	40.79	37.39
CL10476.Contig3_All	10.29	8.96	8.88	15.96	17.07	21.8
CL10479.Contig1_All	1.1	0.99	1.27	0.34	0.38	0.26
CL10479.Contig2_All	1.41	1.31	1.93	0.7	0.32	0.75
CL10480.Contig1_All	0.86	1.96	1.06	5.14	5.69	3.05
CL10480.Contig2_All	6.24	5.81	6.83	1.32	1.97	0.91
CL10482.Contig1_All	0.33	0.17	0.34	2.31	1.85	1.66
CL10483.Contig1_All	0.05	0.05	0.39	0.85	0.63	0.97
CL10483.Contig2_All	0.67	0.69	0.59	2.52	1.53	2.39
CL10483.Contig3_All	1.74	1.57	2.11	0	0.52	0
CL10484.Contig1_All	2.47	2.16	2.43	1.31	0.96	1.67
CL10484.Contig2_All	2.51	1.39	1.64	0.99	0.64	1.14
CL10484.Contig3_All	3.24	3.05	2.84	2.19	2.02	2.56
CL10484.Contig4_All	4.56	6.39	5.35	8.8	10.4	8.6
CL10485.Contig5_All	4.46	5.87	4.38	0.86	1.68	1.53
CL10486.Contig2_All	11.78	9.97	11.08	7.23	8.63	7.71
CL10486.Contig3_All	49.52	46.6	52.34	51.15	48.53	49.14
CL10488.Contig1_All	7.18	7.93	6.98	2.34	2.3	2.36
CL10488.Contig2_All	1.16	0.71	0.98	4.4	5.08	4.85
CL10488.Contig3_All	1.19	1.04	1.38	4.09	4.08	4.68
CL10489.Contig2_All	2.86	2.74	1.85	1.32	1.16	1.14
CL1049.Contig4_All	2.35	2.6	1.94	4.7	5.23	4.41
CL10490.Contig5_All	1.81	1.56	1.89	3.45	2.92	3.43
CL10490.Contig6_All	0.7	0.25	0.45	1.83	1.57	0.84
CL10492.Contig1_All	2.48	2.82	3.18	0	0	0
CL10492.Contig3_All	0.16	0.7	0.52	5.64	4.52	4.3
CL10493.Contig2_All	1.57	2.72	1.53	0.25	0.18	0.32
CL10493.Contig3_All	1.19	0.99	0.42	0	0	0
CL10493.Contig4_All	0.17	0	0.21	1.33	1.33	1.49
CL10493.Contig5_All	1.38	1.3	0.75	0.05	0.06	0.06
CL10495.Contig1_All	4.64	4.66	5.1	8.03	6.88	7.7
CL10495.Contig2_All	1.92	2.32	2.65	3.87	4.29	5.16
CL10498.Contig1_All	0	0	0	0.99	0.47	0.69
CL10498.Contig2_All	3.06	3.68	3.67	1.58	1.39	1.97
CL105.Contig10_All	6.4	4.4	5.92	0.19	0	0
CL105.Contig11_All	5.15	5.57	5.91	1.12	1.14	1.34
CL105.Contig1_All	2.77	1.72	2.16	5.22	3.93	3.3
CL105.Contig6_All	0.9	1.59	0.43	0.08	0.13	0.14
CL105.Contig7_All	1.46	1.25	1.11	0	0	0
CL105.Contig8_All	0.43	0.35	0.21	3.03	2.51	3.15
CL1050.Contig10_All	0	0	0	2.4	1.36	1.74
CL1050.Contig11_All	0.23	0	0	1.22	1.15	1.06
CL1050.Contig13_All	1.64	2.64	2.37	0.22	0.85	0.23
CL1050.Contig14_All	2.1	2.74	1.66	0	0	0.04
CL1050.Contig15_All	0.3	0.38	0	1.39	1.45	1.38
CL1050.Contig17_All	1.91	1.65	1.48	0	0	0
CL1050.Contig18_All	4.82	4.26	4.15	0	0	0
CL1050.Contig1_All	0	0	0	0.41	0.41	0.03
CL1050.Contig20_All	2.53	2.35	2.59	0	0	0
CL1050.Contig22_All	0	0.06	0	3.75	2.39	2.96
CL1050.Contig25_All	0	0	0	2.1	0.93	1.69
CL1050.Contig26_All	2.55	1.86	1.35	0	0	0
CL1050.Contig27_All	0.13	0.05	0	0	0	0
CL1050.Contig29_All	0.92	0.57	1.06	1.97	2.17	2.21
CL1050.Contig30_All	1.46	2.45	2.86	0.22	0.24	0.32
CL1050.Contig33_All	0.1	0.08	0.17	1.89	1.79	2.16
CL1050.Contig34_All	1.04	1.08	0.68	4.97	2.87	1.64
CL1050.Contig38_All	1.69	1.11	1.58	0	0	0
CL1050.Contig39_All	3.15	2.88	3.1	0.13	0.13	0.13
CL1050.Contig40_All	5.31	5.09	5.73	0	0.26	0
CL1050.Contig42_All	1.85	0.99	2	0	0	0
CL1050.Contig45_All	0.36	0.82	1.08	0	0	0
CL1050.Contig46_All	0.26	0.16	0	1.52	1.45	3
CL1050.Contig47_All	0.95	0.98	0.63	0	0	0.15
CL1050.Contig48_All	3.96	3.12	2.71	0.43	0	0
CL1050.Contig4_All	1.29	1.06	1.44	0	0	0
CL1050.Contig5_All	3.04	2.19	1.75	0	0	0
CL10500.Contig1_All	6.1	6.79	7.67	3.85	2.73	3.19
CL10500.Contig2_All	2.11	2.08	2.18	3.4	3.61	3.94
CL10501.Contig1_All	0	0.23	0	13.97	10.65	9.89
CL10501.Contig2_All	0	0	0	7.11	7.13	6.95
CL10501.Contig3_All	13.91	11.88	16.64	25.64	24.53	27.65
CL10501.Contig4_All	20.5	18.15	23.76	115.73	130.82	108.1
CL10502.Contig2_All	4	3.52	3.98	8.21	7.93	7.41
CL10502.Contig3_All	2.27	2.63	2.41	4.73	3.93	5
CL10506.Contig1_All	0.47	0.37	0.23	1.4	2.07	2.11
CL10506.Contig2_All	1.9	2.23	2.05	0.34	0.48	0.41
CL10506.Contig3_All	0.42	1.06	0.74	0.09	0.15	0.13
CL10506.Contig4_All	1.69	2.82	2.41	0.34	0.25	0.3
CL10506.Contig5_All	0.73	0.63	0.99	3.53	3.32	3.37
CL10507.Contig4_All	0.76	0.4	0.5	2.46	1.94	2.04
CL10507.Contig5_All	2.28	2.47	1.86	1.4	1.36	1.82
CL10508.Contig1_All	21.15	15.99	22.6	17.53	15.82	15.59
CL10508.Contig2_All	4.43	3.2	3.66	1.12	1.59	1.88
CL10509.Contig1_All	0.07	0	0.15	1.72	1.71	1.82
CL10509.Contig2_All	5.87	6.55	5.5	3.22	2.76	2.54
CL10509.Contig3_All	5.97	6.04	3.98	1.2	1.6	2.05
CL1051.Contig10_All	0.08	0	0	1.17	1.26	1.61
CL1051.Contig14_All	1	1.21	0.91	0.1	0.1	0.23
CL1051.Contig17_All	0.9	0.76	0.7	0.23	0.28	0.22
CL1051.Contig1_All	1.66	1.12	1.53	0.89	0.72	0.99
CL1051.Contig22_All	0.7	0.74	0.72	1.69	1.74	1.47
CL1051.Contig23_All	0.94	0.81	1.29	0.54	0.36	0.39
CL1051.Contig25_All	0	0.26	0.11	1.18	1.08	1.02
CL1051.Contig28_All	2.07	1.45	1.76	0	0	0.03
CL1051.Contig29_All	0.8	0.78	0.67	1.58	1.13	1.22
CL1051.Contig31_All	2.78	3.21	2.94	0	0.14	0.07
CL1051.Contig4_All	0.13	0	0.07	0.93	0.64	0.89
CL1051.Contig6_All	0	0	0	0.78	0.94	0.29
CL1051.Contig7_All	0.5	1.1	0.27	5.18	6.26	5.87
CL1051.Contig9_All	0.12	0.23	0.24	1.07	0.84	0.74
CL10510.Contig1_All	4.67	4.88	5.2	2.05	1.83	2.06
CL10510.Contig2_All	7.51	6.64	5.54	2.08	2.27	2.73
CL10511.Contig10_All	0.08	0.07	0.17	1.39	1.24	1.51
CL10511.Contig13_All	0	0	0.16	0.5	0.59	0.41
CL10511.Contig14_All	0.06	0	0	1.65	1.41	2.03
CL10511.Contig17_All	0.18	0.3	0.13	0.07	0	0.11
CL10511.Contig18_All	0.74	1.39	1.54	0.44	0.56	0.42
CL10511.Contig21_All	0.87	1.26	0.81	1.87	2.01	2.11
CL10511.Contig23_All	0	0	0	0.42	0.34	0.24
CL10511.Contig24_All	0.34	0.12	0.25	0	0.07	0.06
CL10511.Contig25_All	1.64	1.88	1.81	0.9	0.43	0.38
CL10511.Contig5_All	1.2	0.25	0.49	0	0.12	0.09
CL10512.Contig1_All	5.28	4.07	5.61	47.98	40.93	44.08
CL10512.Contig2_All	34.99	29.81	28.5	68.41	64.91	62.32
CL10512.Contig3_All	88.31	81.78	87.04	208.48	193.98	205.99
CL10512.Contig4_All	0	0	0	41.49	38.41	37.78
CL10514.Contig1_All	2.22	2.33	2	0.84	0.92	0.92
CL10514.Contig2_All	16.91	18.46	17.63	27.77	27.96	28.54
CL10515.Contig3_All	13.38	15.08	13.88	5.74	6.64	6.38
CL10516.Contig2_All	3.45	4.6	4.26	3.47	2.26	3.34
CL10518.Contig1_All	1.89	1.06	1.9	7.56	7.18	8.43
CL10518.Contig2_All	0	0	0	5.3	4.91	7.44
CL10518.Contig3_All	3.22	3.42	2.6	16.62	13.91	14.6
CL10519.Contig1_All	2.87	3.43	3.24	0.51	0.15	0.16
CL1052.Contig2_All	2.12	2.66	1.07	4.28	4.79	5.16
CL10520.Contig3_All	3.25	4.05	3.23	2.24	2.33	1.72
CL10521.Contig1_All	4.29	4.89	4.7	1.21	1.2	1.01
CL10521.Contig3_All	2.81	2.47	3.61	5.6	5.42	5.68
CL10523.Contig2_All	1.67	1.05	1.14	0.49	0.56	0.3
CL10523.Contig4_All	18.82	18.51	15.17	12.73	12.85	14.93
CL10524.Contig1_All	0	0	0	0.31	1.1	2.54
CL10526.Contig1_All	0	0	0	2.73	1.9	1.96
CL10526.Contig2_All	3.96	4.52	5.66	1.94	2.16	2.39
CL10527.Contig1_All	66.27	61.52	61.8	30.45	31.58	26.34
CL10527.Contig2_All	155.81	144.87	142.38	17.9	20.86	17.75
CL10528.Contig1_All	7.41	2.84	3.86	2.62	0.48	1.16
CL10528.Contig2_All	0	0	0	1.61	2.16	2.66
CL10529.Contig1_All	1.36	0.98	0.49	0	0	0
CL1053.Contig10_All	2.12	1.51	2.02	4.42	4.11	4.82
CL1053.Contig4_All	1.04	1.09	1.44	0.59	0.27	0.52
CL1053.Contig5_All	0.41	0.84	0.3	1.4	1.57	1.83
CL1053.Contig6_All	0.11	0.08	0.06	0.57	0.5	0.49
CL1053.Contig7_All	0.57	0.28	0.47	1.13	1.12	1.05
CL10530.Contig2_All	7.87	8.94	8.47	6.84	7.42	6.64
CL10531.Contig1_All	1.87	2.55	3.14	0	0	0
CL10531.Contig2_All	6.27	4.53	5.28	0	0	0
CL10532.Contig1_All	0.33	0.78	0.48	0	0	0
CL10535.Contig2_All	0.7	0.54	0.36	3.82	2.14	1.59
CL10536.Contig1_All	1.8	1.69	2.08	1.39	1.38	1.62
CL10537.Contig1_All	3.56	2.96	1.73	0	0.1	0.34
CL10537.Contig2_All	2.71	1.51	2.49	0.26	0	0
CL1054.Contig2_All	2.14	1.01	1.17	0.34	0	0
CL1054.Contig4_All	1.68	1.81	2.07	0.95	0.94	1.01
CL1054.Contig5_All	2.57	3.27	2.35	5.3	5.12	3.33
CL10540.Contig1_All	359.32	363.48	410.4	318.45	326.35	345.16
CL10540.Contig2_All	7.35	5.57	5.46	17.77	20.09	17.82
CL10540.Contig3_All	10.54	7.93	6.72	13.62	15.38	13.8
CL10541.Contig4_All	6.67	6.84	6.27	4.85	4.97	4.42
CL10542.Contig2_All	1.06	0.46	0.62	2.71	3.11	3.5
CL10543.Contig2_All	5.4	5.09	5.79	9.38	9.47	7.6
CL10543.Contig3_All	8.65	8.83	8.85	4.74	4.82	5.47
CL10544.Contig5_All	1.67	1.22	1.62	2.02	2.17	2.48
CL10546.Contig1_All	1.02	0.9	0.72	16.17	12.77	11.57
CL10546.Contig2_All	8.59	4.63	5.64	20.2	20.88	19.3
CL10547.Contig1_All	0	0	0	0.62	0.59	0.48
CL10547.Contig2_All	1.76	1.6	1.91	4.68	4.33	3.72
CL10548.Contig2_All	13.77	14.26	16.66	32.21	31.17	28.41
CL10548.Contig3_All	1.18	1.1	0.61	5.43	5.76	5.39
CL10548.Contig4_All	32.87	32.97	32.1	70.6	67.98	65.98
CL10549.Contig1_All	0	0.28	0	0.88	0.81	0.76
CL1055.Contig3_All	1.59	2.01	1.52	0	0.19	0.32
CL1055.Contig4_All	0.18	0.12	0.19	2.39	1.56	2.12
CL1055.Contig6_All	8.85	9.38	9.91	34.47	36.13	35.48
CL1055.Contig7_All	7.94	8.59	8.15	0.51	0.49	0.59
CL1055.Contig8_All	3.03	3.8	4.93	0.13	0	0
CL1055.Contig9_All	4.74	4.69	4.54	0.65	0.43	0.43
CL10551.Contig3_All	1.24	0.8	1.5	2.77	2.45	3.15
CL10552.Contig2_All	1.06	1.25	0.83	0.63	0.36	0.58
CL10553.Contig2_All	1.28	1.78	1.29	0.75	0.9	0.85
CL10558.Contig1_All	0.52	0.18	0.05	3.92	3.21	3.27
CL10558.Contig2_All	5.21	4.52	4.56	1.28	1.32	1.3
CL10559.Contig1_All	2.82	2.17	3.28	7.9	7.34	7.91
CL10559.Contig2_All	13.07	11.82	12.78	10.5	10.69	11
CL10562.Contig1_All	15.77	16.53	16.54	5.68	5.94	6.19
CL10562.Contig3_All	6.62	5.88	5.77	2.51	1.59	2.46
CL10563.Contig1_All	0.22	0.05	0	2.79	2.75	2.47
CL10563.Contig3_All	1.88	3.29	2.7	1.72	1.58	1.8
CL10564.Contig6_All	1.54	1.39	1.09	0.72	0.9	0.65
CL10567.Contig1_All	1.79	1.76	1.81	0.47	0.34	0.97
CL10568.Contig3_All	0.29	0.35	0.26	1.22	0.73	1.35
CL10568.Contig4_All	1.36	1.49	1.08	3.48	2.94	3.35
CL10568.Contig5_All	0.29	0.28	0.36	1.38	1.15	1.13
CL10568.Contig6_All	13.8	13.03	13.6	20.45	21.01	20.2
CL10569.Contig6_All	0.58	0.77	0.41	2.83	2.5	2.89
CL1057.Contig10_All	0.53	0.65	0.76	0.96	1.37	1.09
CL1057.Contig11_All	0.68	1.31	0.96	0	0	0
CL1057.Contig13_All	0.45	0.65	0.68	1.48	0.81	1.27
CL1057.Contig14_All	1.08	0.8	0.85	2.34	2.12	2.9
CL1057.Contig1_All	0.09	0.23	0	0.59	0.32	0.53
CL1057.Contig4_All	0.68	0.48	0.32	0	0	0.15
CL1057.Contig5_All	3.18	2.32	2.62	1	0.27	0.4
CL1057.Contig9_All	0.31	0.25	0.51	1.51	1.42	2.13
CL10570.Contig1_All	2.5	2.19	2.66	0.6	0.42	0.85
CL10570.Contig2_All	9.85	10.71	11.73	15.61	17.17	18.32
CL10570.Contig3_All	0.34	0.7	0.88	0.13	0	0
CL10571.Contig1_All	10.37	10.49	10.76	5.57	8.36	5.28
CL10571.Contig2_All	12.3	13.83	12.66	10.94	10.49	10.47
CL10571.Contig3_All	9.26	9.31	10.02	14.85	14.22	14.72
CL10571.Contig4_All	9.77	12.27	11.39	9.16	8.57	9.58
CL10573.Contig1_All	1.72	1.59	1.95	2.83	3.95	4.17
CL10575.Contig2_All	0	0	0	5.12	3.7	5.94
CL10575.Contig3_All	12.32	11.1	10.65	8.56	7.56	7.41
CL10578.Contig2_All	1.97	2.63	2.24	0.48	0	0.27
CL10579.Contig3_All	8.29	9.34	8.69	7.1	7.88	9.09
CL1058.Contig1_All	23.18	24.76	22.9	63.73	68.16	64.71
CL1058.Contig2_All	18.99	15.99	16.83	4.24	3.98	3.96
CL1058.Contig3_All	1.36	1.04	1.2	4.17	4.98	4.83
CL1058.Contig5_All	27.88	29.83	29.97	24.31	24.66	24.45
CL10580.Contig1_All	4.87	3.36	3.41	0	0.38	0
CL10580.Contig3_All	0.4	1.48	1.07	12.81	10.99	11.33
CL10581.Contig1_All	0.24	0.1	0.11	0.69	0.75	1.48
CL10582.Contig1_All	0.65	1.58	1.24	0.53	0.45	0.19
CL10582.Contig2_All	5.36	6.06	5.63	9.21	8.28	8.03
CL10582.Contig3_All	5.16	3.6	3.45	1.73	2.91	3.24
CL10583.Contig3_All	0	0	0	3.89	5.14	4.53
CL10584.Contig1_All	11.87	10.1	10.09	21.75	21.36	19.78
CL10585.Contig2_All	0.37	0.56	0.55	2.1	1.54	1.71
CL10585.Contig3_All	0	0.15	0	1.14	1.03	1.08
CL10586.Contig1_All	0.23	0.54	0.37	0.8	1.5	1.57
CL10587.Contig1_All	18.42	18.22	18.61	18.08	16.75	16.17
CL10587.Contig2_All	17.08	16.65	18.22	15.27	14.49	14.54
CL1059.Contig2_All	11.38	11.74	11.38	5.64	5.42	5.73
CL10591.Contig1_All	0.41	0.19	0.72	0.04	0.23	0.09
CL10591.Contig2_All	0	0.2	0.14	0	0	0
CL10591.Contig3_All	4.17	3.8	4.66	2.02	2.47	2.97
CL10591.Contig4_All	4.06	3.86	4.11	3.47	3.4	3.47
CL10592.Contig1_All	1.08	1.11	0.96	9.51	8.31	7.88
CL10592.Contig2_All	5.17	6.83	6.28	3.89	4.57	4.07
CL10595.Contig1_All	10.96	10.14	11.13	13.66	14.6	15.2
CL10595.Contig2_All	8.26	6.95	6.52	11.99	12.11	10.9
CL10595.Contig4_All	0.85	0.78	0.6	2.49	2.75	3.26
CL10596.Contig2_All	0.21	0.22	0.32	1.9	2.02	1.97
CL10596.Contig3_All	3.24	3.27	1.89	1.44	2.41	1.14
CL10599.Contig1_All	0.47	0.11	0.12	2.09	2.65	2.88
CL10599.Contig3_All	7.52	8.95	9.02	6.16	6.49	5.19
CL106.Contig10_All	2.01	2.46	2.01	0.42	0.21	0.46
CL106.Contig11_All	3.21	3.22	2.34	8.25	7.05	7.71
CL106.Contig14_All	0.51	0.45	0.41	0.27	0.16	0.17
CL106.Contig18_All	1.47	1.23	1.28	1.02	0.64	1.14
CL106.Contig21_All	0	0	0	0	0.43	0.73
CL106.Contig24_All	1.44	0.52	0.53	0	0	0
CL106.Contig26_All	19.54	18.88	14.31	27.73	25.81	35.64
CL106.Contig28_All	2.43	4.16	2.8	0.24	0.25	0.36
CL106.Contig29_All	6.14	5.01	7.97	18.9	21.08	15.83
CL106.Contig30_All	0	0	0	4.18	4.01	4.14
CL106.Contig32_All	0.19	0.19	0	2.5	1.99	3.78
CL106.Contig33_All	24.06	27.43	24.5	28.24	22.48	21.78
CL106.Contig36_All	6.06	8.05	6.88	6.1	5.5	4.75
CL106.Contig3_All	0.3	0.57	1.03	5.1	7	5.53
CL106.Contig5_All	16.05	14.71	14.75	0.35	0.28	0
CL106.Contig8_All	1.54	0.52	0.52	0	0	0
CL106.Contig9_All	0.48	0.98	0.56	1.45	3.16	1.97
CL1060.Contig11_All	2.07	2.5	1.97	0.53	0.54	0.79
CL1060.Contig12_All	0.32	0.2	0.25	0.71	0.77	1.04
CL1060.Contig13_All	0.1	0.09	0.82	1.71	1.2	1.08
CL1060.Contig14_All	0.26	0.31	0.41	3.79	4.46	3.92
CL1060.Contig16_All	1.87	2.1	2.14	1.18	1.56	1.41
CL1060.Contig18_All	0	0	0	1.46	0.66	1.13
CL1060.Contig19_All	0	0	0	0	0.69	0.47
CL1060.Contig20_All	0	0	0	2.01	2.13	2.62
CL1060.Contig23_All	1.27	1.16	1.96	0.66	1	0.65
CL1060.Contig3_All	0.37	0.29	0.23	2.32	2.32	2.03
CL1060.Contig4_All	0.58	0.76	0.6	1.65	0.99	1.43
CL1060.Contig6_All	1.3	1.91	1.95	6.85	7.67	7.19
CL1060.Contig7_All	1.18	1.35	2.08	0.83	0.83	0.85
CL1060.Contig8_All	2.89	2.36	2.16	1.57	1.56	1.51
CL10600.Contig1_All	7.22	8.21	5.9	3.9	4.25	4.9
CL10600.Contig2_All	0.71	0.39	0.83	3.01	3.53	2.51
CL10600.Contig3_All	5.21	5.6	5.54	2.69	1.35	1.02
CL10600.Contig4_All	1.63	2.21	2.22	0.08	1.18	0.1
CL10600.Contig5_All	0.44	0.36	0.42	4.48	4.4	3.19
CL10601.Contig1_All	0.79	0.68	0.33	0.86	1.42	2.2
CL10601.Contig3_All	1.64	1.99	2	0.61	0.97	0.85
CL10601.Contig4_All	0.78	0.43	0.46	5.08	5.69	5.11
CL10601.Contig5_All	5.15	6.08	6.79	6.18	5.01	5.61
CL10602.Contig1_All	0.1	0	0	1	0.93	0.51
CL10602.Contig2_All	0.35	0.05	0.1	0.71	0.82	1.39
CL10603.Contig1_All	2.32	2.55	2.36	4.46	3.85	4.86
CL10603.Contig3_All	5.7	5.78	6.76	10.18	8.47	9.54
CL10605.Contig2_All	0	0.1	0.15	1.06	2.78	1.7
CL10606.Contig2_All	1.79	2.09	2.69	0	0	0.23
CL10606.Contig3_All	13.52	12.16	11.04	10.03	8.39	9.95
CL10609.Contig5_All	3.9	4.56	4.34	1.68	1.54	1.45
CL1061.Contig2_All	3.36	3.82	4.11	1.88	1.25	0.68
CL10610.Contig2_All	1.79	1.41	1.98	0.3	0.56	0.76
CL10611.Contig6_All	0	0	0	2.63	0.68	1.14
CL10613.Contig2_All	2.52	1.62	2.03	0	0	0
CL10613.Contig3_All	1.62	2.05	2.08	0.26	0.44	0.31
CL10613.Contig4_All	2.3	1.87	2.42	0.94	0.73	1.24
CL10614.Contig3_All	1.15	1.17	1.18	0.1	0.65	0.2
CL10615.Contig1_All	53.13	51.99	43.08	34.81	34.7	32.05
CL10615.Contig2_All	61.57	58.9	65.53	53.75	60.35	52.41
CL10615.Contig3_All	4.84	1.7	6.34	0	0	0
CL10616.Contig2_All	0.08	0	0	0.58	0.55	0.56
CL10617.Contig1_All	1.46	0.51	1.84	0	0	0
CL10617.Contig4_All	1.86	1.4	1.79	5.25	5.37	4.17
CL1062.Contig3_All	61.14	75.99	78.25	40.91	45.09	39
CL10622.Contig2_All	0	0	0	2.05	2.26	1.6
CL10623.Contig2_All	0	0	0.02	0.52	0.32	0.31
CL10623.Contig4_All	3.07	2.43	3.54	1.97	1.92	2.05
CL10624.Contig1_All	14.23	14.24	14.85	12.72	12.56	13.63
CL10624.Contig2_All	3.68	2.85	4.17	1.41	2.7	2.73
CL10625.Contig2_All	0.14	0.08	0	0.55	0.58	0.78
CL10626.Contig1_All	0.88	0.78	0.97	2.91	3.11	3.52
CL10626.Contig2_All	3.5	3.34	4.08	7.46	7.53	7.22
CL10626.Contig3_All	31.74	35.37	34.76	7.88	8.23	6.76
CL10627.Contig1_All	15.93	15.66	14.65	0.14	0.07	0
CL10627.Contig2_All	1.51	1.08	1.87	0.14	0.21	0
CL10628.Contig3_All	3.15	2.95	3.08	5.17	5.01	5.24
CL10628.Contig4_All	4.61	5.82	5.11	3.64	3.48	3.68
CL10629.Contig1_All	1.05	1.46	1.27	0.16	0	0.16
CL1063.Contig4_All	3.31	3.67	3.7	1.76	1.26	1.11
CL10630.Contig2_All	2.59	2.42	2.36	5.48	4.16	4.76
CL10632.Contig2_All	3.87	4.5	4.34	1.88	1.51	2.07
CL10634.Contig1_All	12.94	12.44	13.38	22.94	23.86	28.31
CL10634.Contig3_All	19.05	21.34	20.27	27.86	28.01	28.3
CL10635.Contig1_All	0.57	0	0	1.64	2.75	2.45
CL10636.Contig1_All	1.98	1.69	1.87	1.32	1.19	1.57
CL10636.Contig2_All	0	0	0	3.36	2.76	2.73
CL10636.Contig3_All	0.28	0.23	0.38	1.29	0.77	1.6
CL10636.Contig4_All	3.67	3.84	4.16	3.57	3.09	3.62
CL10637.Contig3_All	1.79	2.31	2.87	6.06	5.22	5.2
CL10638.Contig2_All	2.05	2.14	2.8	0.29	0.6	0.83
CL1064.Contig2_All	0.37	0.25	0.27	1.38	0.63	0.79
CL10641.Contig1_All	0	0.49	0.24	1.89	1.9	1.63
CL10641.Contig2_All	7.17	6.88	9.65	0.52	0.94	1.23
CL10641.Contig3_All	0.59	0.15	0.49	6.95	5.33	5.86
CL10643.Contig1_All	0.24	0.18	0.06	0.69	0.72	0.77
CL10644.Contig1_All	0	0.18	0.14	2.05	1.43	1.38
CL10645.Contig1_All	5.95	7.33	5.72	5.63	4.75	5.12
CL10645.Contig2_All	3.93	3.28	3.01	6.5	7.54	8.34
CL10646.Contig1_All	0	0.28	0	2.12	1.7	0.97
CL10647.Contig1_All	13.47	15.33	14.47	18.69	23.07	22.35
CL10649.Contig4_All	0.82	0.29	0.28	2.33	2.31	1.76
CL10649.Contig5_All	0	0	0	1.1	1.15	1.17
CL1065.Contig3_All	14.73	14.33	15.61	5.52	6.19	6.03
CL1065.Contig4_All	4.89	2.96	3.5	0	0.24	0.38
CL1065.Contig5_All	1.37	1.08	0.28	7.6	8.41	8.43
CL10650.Contig1_All	3.38	2.79	3	1.84	1.48	1.51
CL10650.Contig2_All	2.22	2.72	2.9	1.14	1.84	1.7
CL10651.Contig2_All	3.19	4.47	6.63	1.03	0.98	0.95
CL10652.Contig1_All	3.96	3.29	3.94	3.21	2.23	3.02
CL10652.Contig3_All	5.17	6.44	6.05	4.27	3.22	3.47
CL10655.Contig1_All	4.42	4.62	4.48	1.2	0.98	1.05
CL10655.Contig2_All	2.14	2.52	2.08	3.83	4.65	4.69
CL10656.Contig4_All	1.82	2.45	2.29	4.54	4.99	6.41
CL10657.Contig2_All	3.39	3.08	3.75	18.32	18.28	17.22
CL10658.Contig2_All	0.87	0.55	0.92	2.42	2.23	2.62
CL10659.Contig1_All	0.09	0	0	0.45	0.51	0.08
CL10659.Contig2_All	0	0	0	1.19	1.1	1.17
CL10660.Contig1_All	0.33	0	0.1	1.18	1.02	1.53
CL10661.Contig1_All	1.5	1.35	1.99	0.98	0.77	0.91
CL10662.Contig1_All	0	0.05	0	2.53	1.92	2.3
CL10662.Contig3_All	2.03	1.88	2.37	0	0.09	0
CL10666.Contig3_All	0.63	0	0	3.3	3.76	2.23
CL10667.Contig2_All	2.8	1.33	2.59	4.94	5.29	3.78
CL10667.Contig3_All	3.74	5.34	3.61	2.1	1.72	2.53
CL10669.Contig1_All	0.35	0	0.18	1.17	2.2	1.22
CL10669.Contig2_All	3.61	2.51	2.69	0.75	1.78	0.59
CL1067.Contig4_All	0.5	0.78	0.47	3	1.43	1.73
CL1067.Contig5_All	0	0	0	2.57	2.66	1.9
CL10670.Contig3_All	2.97	4.12	2.24	0.34	0.32	0
CL10671.Contig1_All	0.82	1.65	0.8	0	0	0
CL10671.Contig2_All	1.89	0.71	0.27	0	0	0
CL10672.Contig1_All	15.54	17.6	17.02	93.23	101.92	97.17
CL10672.Contig2_All	0	0	0	1.22	1.61	1.03
CL10672.Contig3_All	54.69	60.31	63.8	124.45	127.64	139.14
CL10672.Contig4_All	93.21	101.94	95.46	122.53	125.34	128.37
CL10673.Contig5_All	0.98	1.01	1.06	2.02	1.99	2.16
CL10674.Contig2_All	2.28	2.37	1.68	3.95	3.86	3.67
CL10674.Contig4_All	6.21	5.31	5.09	7.53	8.67	8.41
CL10675.Contig1_All	13.48	13.06	11.71	6.55	7.78	6.87
CL10675.Contig4_All	3.24	4.3	3.48	9.74	11.68	11.22
CL10675.Contig5_All	29.05	30.27	27.07	21.93	22.04	19.8
CL10676.Contig2_All	0.58	0.83	0.95	3.47	3.06	2.43
CL10677.Contig1_All	0	0	0	1.02	0.39	0.84
CL10679.Contig2_All	16.18	15.11	15.25	13.66	14.94	14.29
CL1068.Contig4_All	0	0	0	1.13	0.21	0.69
CL1068.Contig5_All	1.68	2.17	3.33	1.46	1.03	1.4
CL10680.Contig3_All	1.52	1.49	1.46	2.82	3.35	2.72
CL10682.Contig1_All	3.06	3.07	2.45	0.7	1.54	1.08
CL10684.Contig1_All	0.71	0.35	0.86	5.33	4.91	3.7
CL10684.Contig2_All	1.68	2.3	2.25	1.31	1.07	0.91
CL10684.Contig3_All	1.6	1.89	1.49	3.55	3.6	5.05
CL10684.Contig4_All	3.73	3.98	3.95	1.07	0.85	1.05
CL10684.Contig5_All	2.42	2.68	2.43	4.91	4.04	3.27
CL10686.Contig1_All	0.42	0.52	0.48	2.92	1.64	2
CL10686.Contig2_All	13.02	10	10.97	2.5	2.24	2.16
CL10687.Contig1_All	1.83	2.66	1.6	0.9	0.45	0.91
CL10687.Contig2_All	0.86	0.43	0.68	1.56	1.91	1.66
CL1069.Contig2_All	1.12	1.68	0.99	5.23	6.02	5.13
CL1069.Contig4_All	8.94	8.73	9.25	9	7.9	9.25
CL1069.Contig5_All	21.15	20.97	23.14	22.52	20.6	21.6
CL10690.Contig1_All	0.82	0.65	1.61	0	0.17	0
CL10690.Contig2_All	4.81	3.85	4.02	0.12	0.21	0.22
CL10691.Contig1_All	1.52	2.68	3.42	9.7	8.68	6.3
CL10691.Contig2_All	2.68	3.08	1.77	8.49	9.71	10.72
CL10691.Contig3_All	8.73	6.81	8.17	0.69	1.12	1.52
CL10692.Contig2_All	0.23	0.47	0.35	4	1.95	3.99
CL107.Contig10_All	184.42	172.6	174.35	14.13	14.7	12.26
CL107.Contig11_All	118.48	132.46	115.87	124.01	124.13	129.72
CL107.Contig12_All	925.95	973.94	1016.1	933.23	1007.86	1052.46
CL107.Contig13_All	9.55	11.69	11.86	7.96	8.13	8.67
CL107.Contig15_All	331.01	341.06	315.66	255.65	238.75	270.29
CL107.Contig16_All	23.82	25.4	24.23	8.53	8.62	9.73
CL107.Contig18_All	3.18	3.24	2.18	122.93	130.33	121.37
CL107.Contig19_All	195.1	200.99	205.83	155.06	145.29	161.64
CL107.Contig1_All	7.09	6.34	6.43	3.78	3.63	3.81
CL107.Contig20_All	4.52	5.11	5.15	15.26	16.73	16.59
CL107.Contig21_All	13	14.36	14.02	19.03	19.73	16.88
CL107.Contig22_All	70.21	68.84	72.38	20.75	19.29	23.56
CL107.Contig24_All	38.48	41.49	41.75	33.02	34.15	35.14
CL107.Contig25_All	495.29	497.79	499.26	386.32	364.08	335.86
CL107.Contig26_All	4.56	4.48	5.41	11.45	11.48	13.04
CL107.Contig27_All	7.71	7.79	8.71	16.59	14.79	17.08
CL107.Contig28_All	4.41	4.32	5.76	8.73	8.54	8.27
CL107.Contig29_All	3.99	3.46	4.07	11.98	11.79	12.3
CL107.Contig2_All	616.14	632.95	693.78	33.39	35.19	27.63
CL107.Contig3_All	452.7	455.6	445.55	408.99	435.17	379.49
CL107.Contig4_All	122.93	121.62	127.72	36.39	36.3	38.25
CL107.Contig5_All	49.03	67.72	65.18	41.14	38.03	44.02
CL107.Contig6_All	173.99	173.86	171.13	72.76	69.39	74.82
CL107.Contig7_All	49.49	48.89	44.24	33.02	32.57	30.15
CL107.Contig8_All	41.24	35.24	34.78	75.06	71.42	66
CL1070.Contig2_All	0.96	1.73	1.95	0.54	1.11	0.64
CL10703.Contig2_All	1.73	1.52	1.87	3.06	3.21	3.24
CL10704.Contig1_All	1.63	2.71	2.71	0	0.17	0
CL10705.Contig1_All	0.72	0.53	0.93	0.07	0.26	0.21
CL10706.Contig3_All	99.16	100.18	92.01	76.27	80.8	81.49
CL10707.Contig1_All	6.03	5.7	5.98	0	0	0
CL10707.Contig2_All	0.49	0.77	0.67	0	0	0
CL10707.Contig4_All	0.92	0.64	1.12	0	0	0
CL1071.Contig1_All	9.32	8.65	8.66	0.28	0	0.48
CL1071.Contig2_All	0.19	0.27	0.11	0	0	0
CL1071.Contig3_All	1.61	1.55	0.99	0.37	0.37	0.34
CL1071.Contig4_All	0.58	0.67	0.94	0	0	0.04
CL1071.Contig7_All	0.54	0.58	0.61	5.35	5.07	5.16
CL1071.Contig8_All	2.14	1.28	1.94	4.95	4.07	4.78
CL1071.Contig9_All	1.98	1.95	2.81	1.31	0.87	1.16
CL10710.Contig2_All	1.24	0.9	0.89	2.37	1.69	2.76
CL10710.Contig3_All	1.69	1.54	1.89	1.29	1.03	1.51
CL10712.Contig1_All	1.75	1.78	1.6	3.08	2.66	2.78
CL10713.Contig1_All	15.49	16.18	15.29	9.39	9.56	9.88
CL10713.Contig2_All	0.51	0.77	0.4	8.9	8.73	9.6
CL10714.Contig1_All	0.3	0.41	0	1.11	0.86	1.29
CL10714.Contig2_All	0.74	0.91	1	4.35	3.32	3.32
CL10715.Contig1_All	3	3.88	3.26	0.29	0.15	0.13
CL10715.Contig2_All	2.95	3.09	2.68	4.54	4.86	5.26
CL10717.Contig1_All	1.64	1.72	1.59	0.29	0.87	0.38
CL10719.Contig1_All	0	0	0	0.57	1.61	2.44
CL1072.Contig1_All	0.16	0	0	2.64	3.02	1.94
CL1072.Contig2_All	1.96	1.36	1.74	0	0	0
CL1072.Contig5_All	2.84	2.57	2.24	4.34	4.94	7.07
CL1072.Contig6_All	2.09	1.49	1.51	0	0	0
CL10720.Contig2_All	2.6	1.6	2.23	0.72	1.48	0.8
CL10721.Contig13_All	0.49	0	0.21	1.66	1.74	3.69
CL10721.Contig15_All	3.46	2.96	2.76	0	0	0
CL10721.Contig16_All	8.71	9.79	9.22	0.2	0	0
CL10721.Contig18_All	1.24	0.95	1.44	0.04	0.04	0.17
CL10721.Contig19_All	4.02	3.05	4.44	0.47	0	0.12
CL10721.Contig23_All	5.42	3.85	4.51	0.32	0	0.12
CL10721.Contig25_All	0.94	1.11	0.99	0.61	0.21	0.58
CL10721.Contig26_All	0.52	0.65	0.84	2.08	1.45	2.03
CL10721.Contig29_All	0.15	0.07	0.21	0.62	0.77	0.91
CL10721.Contig30_All	1.42	1.35	1.07	0.78	0.87	0.82
CL10721.Contig32_All	1.03	0.67	0.98	0	0	0
CL10721.Contig35_All	0.26	0.23	0.13	0	0.04	0
CL10721.Contig42_All	0.64	0.46	0.64	0.11	0.04	0.03
CL10721.Contig45_All	0.25	0.36	0.62	0.08	0	0.2
CL10721.Contig46_All	0	0	0	1.84	2.16	1.14
CL10721.Contig47_All	3.19	2.74	3.71	1.88	1.61	1.66
CL10721.Contig6_All	1.66	1.94	2.36	0.67	0.59	0.46
CL10721.Contig7_All	1.33	1.11	0.83	0.37	0.23	0.16
CL10721.Contig9_All	0	0.19	0.35	0.7	0.72	0.56
CL10722.Contig1_All	0.45	0.29	0.34	0	0	0
CL10724.Contig1_All	16.38	12.17	15.71	1.52	1.69	4.04
CL10724.Contig2_All	6.89	3.99	8.84	2.91	1.76	1.81
CL10724.Contig3_All	15.36	11.22	13.17	25.12	25.71	24.02
CL10724.Contig5_All	0	0	0	2.78	5.3	2.6
CL10725.Contig1_All	0	0	0.12	1.98	3.17	3.57
CL10725.Contig2_All	8.96	7.69	8.19	4.77	4.9	4.03
CL10729.Contig5_All	3.65	3.68	3.75	2.59	2.96	2.3
CL10730.Contig1_All	4.4	4.89	3.63	2.33	3.02	2.19
CL10730.Contig3_All	1.11	1.58	1.05	3.02	2.36	3.48
CL10734.Contig10_All	13.9	14.48	13.64	10.06	9.29	10.6
CL10734.Contig2_All	59.33	61.43	64.46	16.64	16.46	17.3
CL10734.Contig4_All	4.11	4.17	4.97	21.63	21.85	19.46
CL10734.Contig5_All	180.42	198.51	192.58	158.82	170.92	167.76
CL10734.Contig6_All	1.13	1.57	1.88	5.27	4.85	5.05
CL10734.Contig8_All	2.81	2.47	1.16	0.86	0.57	1.67
CL10734.Contig9_All	1.03	1.83	1.99	4.49	3.79	3.71
CL10736.Contig1_All	2.86	3.45	3.71	10.31	10.47	8.99
CL10736.Contig2_All	18.19	19.38	19.42	6.74	6.9	7.68
CL10738.Contig2_All	1.96	2.99	1.69	1.57	0.78	0.73
CL10739.Contig2_All	5.13	5.29	4.71	3.62	3.99	2.98
CL1074.Contig16_All	20.89	20.88	22.42	31.75	35.69	26.04
CL1074.Contig22_All	0	0	0.11	0.67	0.16	0.3
CL1074.Contig24_All	9.99	10.26	10.65	17.71	21	17.04
CL1074.Contig25_All	7	6.96	6.16	0.06	0	0
CL1074.Contig26_All	7.67	14.39	8.31	4.68	6.3	4.3
CL1074.Contig3_All	2.33	1.76	1.97	0	0	0
CL1074.Contig4_All	2.54	2.57	2.02	1.8	0.98	1.64
CL1074.Contig7_All	0.1	0.17	0.2	0.87	0.85	0.78
CL10740.Contig1_All	17.34	18.23	19.12	10.24	10.51	11.18
CL10740.Contig2_All	8.23	8.24	8.59	21.66	20.42	21.13
CL10742.Contig2_All	6.83	5.63	5.05	0.92	0.12	1.16
CL10744.Contig1_All	3.44	4.06	2.99	0	0	0
CL10745.Contig1_All	30.49	30.61	30.39	23.31	26.94	27.45
CL10745.Contig2_All	71.22	74.56	68.6	56.33	57.52	53.68
CL10748.Contig2_All	0.08	0	0	3.37	2.02	3.61
CL10749.Contig1_All	2.42	2.68	2.8	6.71	5.89	7.97
CL10749.Contig2_All	7.32	6.3	7.47	5.97	5.28	4.91
CL1075.Contig11_All	0.24	0.11	0.13	0	0	0
CL1075.Contig15_All	0.43	0.48	0.5	6.9	6.02	6.22
CL1075.Contig19_All	0	0.09	0.14	0.71	0.25	0.64
CL1075.Contig20_All	0	0	0	0.66	0.38	0.33
CL1075.Contig21_All	0.22	0.18	0.28	0.07	0.04	0.02
CL1075.Contig23_All	0.48	0.46	0.33	0	0	0
CL1075.Contig25_All	0.23	0.08	0.3	0	0	0.02
CL1075.Contig26_All	0.1	0.29	0.14	0.51	0.87	0.93
CL1075.Contig27_All	0.21	0.26	0.26	0	0	0
CL1075.Contig32_All	0.62	0.85	0.67	0.28	0.1	0.14
CL1075.Contig34_All	0	0	0.01	0	0.2	0.21
CL1075.Contig35_All	0.1	0.2	0.11	0.71	0.62	0.63
CL1075.Contig36_All	1.84	3.15	2.3	0	0	0
CL1075.Contig38_All	0.57	0.31	0.58	0.2	0.19	0.2
CL1075.Contig39_All	0.23	0.3	0.32	1.78	1.31	1.5
CL1075.Contig40_All	0.55	0.43	0.73	0.38	0.27	0.33
CL1075.Contig41_All	2.02	1.23	0.55	3.96	5.06	4.6
CL1075.Contig42_All	0.16	0.11	0.1	0.45	0.4	0.5
CL1075.Contig47_All	0.4	0	0.85	2.59	1.36	0.89
CL1075.Contig4_All	0	0	0	0.16	0.16	1.21
CL1075.Contig6_All	0.33	0	0.31	0	0	0
CL1075.Contig8_All	0.38	0.32	0.2	1.28	1.51	0.47
CL1075.Contig9_All	0.82	0.61	0.7	0.18	0.17	0
CL10750.Contig1_All	2.99	1.13	1.55	0	0	0
CL10750.Contig2_All	7.4	7.79	8.9	14.1	14.17	16.09
CL10750.Contig4_All	0.19	0.1	0.19	2.91	3.81	4.12
CL10751.Contig1_All	3.93	3.04	3.17	0.73	1.45	0.63
CL10751.Contig3_All	6.15	6.8	8.07	19.26	21.28	15.83
CL10752.Contig2_All	47.11	39.55	47.73	40.54	43.85	39.84
CL10752.Contig3_All	51.19	47.65	45.3	46.5	48.79	47.84
CL10753.Contig4_All	0.46	0.49	0.29	1.2	1.17	0.99
CL10753.Contig5_All	0.43	0.29	0	1.5	1.38	2.19
CL10753.Contig6_All	0	0	0.19	0.82	0.82	0.87
CL10753.Contig8_All	0.34	0.13	0.25	1.05	1	1.43
CL10754.Contig1_All	3.67	3.72	4.14	3.02	2.85	3.06
CL10755.Contig1_All	6.57	6.48	7.22	10.6	10.51	10.15
CL10755.Contig2_All	2.85	2.91	2.79	2.01	1.48	2
CL10755.Contig4_All	3.77	4.47	4.03	0.11	0.21	0.13
CL10756.Contig1_All	0	0	0	2.02	0.88	2.73
CL10756.Contig2_All	0	0	0	2.85	2	2.33
CL10757.Contig2_All	17.52	17.07	17.04	12.41	12.85	12.86
CL10759.Contig2_All	24.54	25.84	27.16	34.6	32.4	33.97
CL1076.Contig6_All	7.99	8.35	7.09	7.49	6.92	6.7
CL10760.Contig2_All	2.88	2.64	3.51	1.61	2.16	1.66
CL10761.Contig1_All	0.35	0.18	0	2.11	1.99	3.2
CL10761.Contig2_All	0.08	0	0.08	1.58	1.84	1.8
CL10762.Contig4_All	10	11.55	10.57	8.78	7.56	8.23
CL10765.Contig1_All	8.1	8.37	8.42	0.16	0.06	0.33
CL10766.Contig1_All	1.4	0.86	2.14	1.04	0.14	0.14
CL10766.Contig3_All	1.06	0.92	1.28	2.92	2.05	3.97
CL10768.Contig1_All	2.7	2.61	2.76	2.27	1.93	1.37
CL10768.Contig2_All	10.7	10.77	10.58	13.78	13.69	16.24
CL10769.Contig1_All	1.8	1.66	0.46	5.4	6.41	5.21
CL10769.Contig2_All	8.72	7.94	10.24	2.23	1.75	4.29
CL1077.Contig2_All	0	0.1	0.21	0.41	0.52	0.72
CL1077.Contig4_All	0.46	0.73	0.84	1.9	0.99	1.88
CL1077.Contig5_All	1.13	1.24	0.71	2.2	1.78	2.13
CL1077.Contig7_All	0.69	0.57	0.55	0.96	1.83	1.22
CL10771.Contig4_All	0.47	0.56	0.13	2.69	1.81	1.39
CL10771.Contig5_All	0	0	0	2.11	2.85	3.46
CL10772.Contig1_All	0.58	1.54	1.31	0.58	0.58	0.46
CL10772.Contig2_All	25.99	25.93	22.46	22.35	21.79	23.66
CL10775.Contig2_All	3.57	5.88	4.67	2.32	1.46	1.73
CL10775.Contig4_All	0.2	0.1	0.51	1.66	0.94	1.04
CL10776.Contig1_All	32.94	35.94	33.08	31.76	28.14	28.21
CL10778.Contig1_All	3.67	3.62	3.61	5.29	5.96	5.93
CL10778.Contig2_All	1.43	1.15	1.55	0.42	0.28	0.18
CL10778.Contig3_All	1.56	1.82	2.13	3.88	3.79	4.46
CL1078.Contig10_All	0	0	0	0.5	0.48	0.44
CL1078.Contig13_All	0	0	0	0.18	0.23	0.25
CL1078.Contig16_All	0	0	0	0.36	0.36	0.93
CL1078.Contig18_All	2.35	1.98	1.49	1.42	0.87	0.7
CL1078.Contig24_All	0.45	0.73	0.55	0	0	0
CL1078.Contig27_All	0.99	1.09	0.99	0.2	0.59	0.33
CL1078.Contig2_All	0	0	0	0.11	0.2	0.29
CL1078.Contig8_All	0	0	0.14	0.25	0.52	0.33
CL10782.Contig1_All	1.6	1.23	2.28	0	0	0
CL10782.Contig2_All	2.7	2.96	2.77	0.84	0.66	0.47
CL10783.Contig1_All	1.62	0.89	0.53	0	0	0
CL10783.Contig3_All	1.4	1.24	1.01	0	0	0
CL10785.Contig1_All	3.54	1.68	4.29	1.64	1.42	1.96
CL10786.Contig1_All	10.15	11.68	10.94	9.26	9.62	8.1
CL10787.Contig1_All	2.32	3.01	2.52	4.61	3.74	5.42
CL10788.Contig1_All	102.22	101.6	99.04	416.78	412.01	398.99
CL10788.Contig2_All	36.43	34.68	30.39	20.02	18.79	19.57
CL10788.Contig3_All	6.56	9.51	5.95	18.7	18.36	24.54
CL10788.Contig4_All	40.92	38.76	45.61	81.28	85.38	89.48
CL10788.Contig5_All	35.17	31.48	32.32	69.75	67.11	64.87
CL10789.Contig1_All	3.55	3.27	3.91	1.13	1.15	1.23
CL1079.Contig1_All	25.62	24.65	29.64	1.04	0.89	0.69
CL1079.Contig2_All	4.5	3.82	3.92	2.42	2.53	2.86
CL1079.Contig3_All	31.04	30.62	28.88	1.64	1.01	1.64
CL1079.Contig4_All	44.86	48.95	49.06	1.37	2.1	2.51
CL10793.Contig2_All	91.64	93.01	90.82	71.59	74.76	76.34
CL10794.Contig1_All	1.81	2.13	1.19	3.45	3.52	3.11
CL10796.Contig2_All	1.53	0.81	1.36	0	0	0
CL10797.Contig1_All	9.33	8.96	8.18	5.28	3.89	5.84
CL10798.Contig3_All	2.91	2.26	2.06	0.74	0.96	0.98
CL108.Contig1_All	0.22	0.42	0.92	2.93	2.17	2.73
CL108.Contig2_All	0.69	0.52	0.61	1.76	1.51	1.62
CL108.Contig4_All	0	0	0	0.36	0.36	0.22
CL108.Contig6_All	2.07	1.69	1.54	8.5	9.18	8.73
CL108.Contig7_All	0.7	1.36	0.81	2.07	2.72	2.9
CL108.Contig8_All	0.26	0.11	0.12	0	0.04	0
CL1080.Contig2_All	1.26	2.28	1.9	1.02	0.93	1.19
CL1080.Contig3_All	2.56	1.95	1.1	2.57	3.3	4.5
CL1080.Contig4_All	4.21	4.75	4.35	1.44	2.47	1.69
CL1080.Contig6_All	3.04	4.11	3.09	1.51	1.93	2.02
CL1080.Contig9_All	0.09	0.27	0.08	3.45	3.08	3.25
CL10800.Contig1_All	0.21	0.23	0.14	1.45	1.27	1.83
CL10800.Contig2_All	1.99	1.97	2.46	1.55	1.13	1.05
CL10800.Contig3_All	3.94	3.9	3.93	1.07	1.13	1.21
CL10802.Contig1_All	0.22	0.11	0.55	3.93	3.73	3.81
CL10803.Contig2_All	1.67	1.96	1.82	3.43	3.71	3.27
CL10804.Contig1_All	2.04	1.08	0.82	0	0	0
CL10805.Contig1_All	0.07	0	0.08	0.43	0.57	0.5
CL10805.Contig3_All	1.26	1.78	1.44	0.57	1.09	0.58
CL10805.Contig4_All	3.9	4.35	4.11	1.67	1.74	2.09
CL10806.Contig2_All	10.39	10.48	10.22	0.65	0.73	0.89
CL10806.Contig3_All	16.05	18.96	16.55	34.67	35.42	30.73
CL10806.Contig4_All	33.37	29.84	30.76	20.32	21.78	22.26
CL10806.Contig5_All	0	0	0	0.56	2.21	1.14
CL10807.Contig5_All	0.73	0.69	0.51	2.53	2.35	2.42
CL10807.Contig7_All	7.21	6.94	6.54	6.01	5.41	6.42
CL10809.Contig2_All	4.59	3.9	4.33	3	2.86	3.27
CL1081.Contig10_All	2.34	2.48	2.11	4.11	4.63	3.51
CL1081.Contig11_All	1.99	2.16	2.43	0.53	0.78	0.55
CL1081.Contig13_All	4.33	4.6	5.36	8	6.98	8.76
CL1081.Contig1_All	1.58	1.3	1.16	7.05	5.67	6.31
CL1081.Contig4_All	4.39	5.2	5.91	9.49	7.8	8.23
CL1081.Contig5_All	8.85	9.62	9.62	14.67	15.29	15.87
CL1081.Contig6_All	11.51	10.19	10.81	7.53	8.72	9.66
CL1081.Contig7_All	2.65	2.57	2.47	1.51	1.68	1.39
CL10810.Contig1_All	1.68	1.99	1.44	3.65	4.07	3.69
CL10811.Contig1_All	0	0	0	0.65	1.61	1.35
CL10812.Contig1_All	18.81	23.38	20.22	8.73	10.46	9.25
CL10812.Contig2_All	0	0	0	28.68	27.13	32.55
CL10812.Contig3_All	25.96	22.65	25.54	18.86	17.19	18.69
CL10813.Contig1_All	2.09	2.33	2.61	10.84	11.26	11.57
CL10813.Contig2_All	14.28	13.55	14.74	6.59	5.97	5.88
CL10813.Contig5_All	1.9	1.58	2.15	5.13	4.84	4.27
CL10813.Contig6_All	3.49	3.69	3.09	1.84	1.79	2.17
CL10815.Contig2_All	1.87	1.98	1.66	0.98	1.28	0.89
CL10816.Contig3_All	4.9	4.28	3.91	1.29	1.29	1.2
CL10816.Contig4_All	0.05	0.13	0.19	2.34	2.06	1.92
CL10816.Contig5_All	0.27	0.33	0.21	1.77	1.48	1.66
CL10817.Contig3_All	2.85	4.26	3.15	6.58	6.03	5.74
CL10817.Contig5_All	0.57	0.77	0.87	4.09	4.5	4.71
CL10817.Contig6_All	2.04	1.63	2.41	6.94	6.19	5.04
CL10817.Contig7_All	15.02	16.04	15.99	7.57	7.56	7.96
CL10818.Contig1_All	2.13	0.41	1.2	0	0	0
CL10818.Contig3_All	4.48	4.91	6.19	0.56	0.91	0.88
CL10819.Contig1_All	2.22	1.93	1.45	3.43	3.36	2.75
CL10819.Contig2_All	0.88	1.02	1.33	2.79	2.65	2.78
CL1082.Contig3_All	2.56	2.64	2.83	0.45	0.77	0.3
CL1082.Contig4_All	2.14	2.84	2.99	0.53	0.77	0.96
CL1082.Contig5_All	1.32	0.84	1.04	4.54	3.84	3.98
CL10822.Contig2_All	2.18	1.96	1.49	0.39	0.37	0.59
CL10823.Contig1_All	161.35	158.12	146.29	18.65	20.55	16.59
CL10823.Contig2_All	45.2	43.12	46.66	116.97	127.05	124.94
CL10824.Contig13_All	6.92	6.1	9.46	12.77	10.92	11.09
CL10824.Contig14_All	0.62	1	0.51	2.31	2.18	2.49
CL10824.Contig16_All	2.64	2.37	2.47	1.75	1.84	2.14
CL10824.Contig1_All	2.52	3.21	1.9	7.23	6.99	5.07
CL10824.Contig2_All	8.84	10.19	6.95	0.23	1.96	0.78
CL10824.Contig3_All	1.6	1.78	1.54	13.54	11.01	10.2
CL10824.Contig4_All	3.42	3.64	3.03	5.45	4.99	5.63
CL10824.Contig5_All	4.93	5.62	5.61	0.72	0.48	0.42
CL10824.Contig7_All	10.61	9.92	8.08	18.27	19.24	19.66
CL10824.Contig8_All	4.08	4.69	5.25	3.62	2.51	2.96
CL10824.Contig9_All	0.2	0.02	0.08	10.91	10.7	10.22
CL10825.Contig2_All	0.83	0.83	0.73	2.35	2.41	2.02
CL10825.Contig4_All	1.35	1.24	1.34	11.56	10.67	11.55
CL10825.Contig5_All	0.54	0.61	0.97	1.5	1.38	2.22
CL10827.Contig1_All	0.08	0.17	0.19	0.81	1.95	0
CL10827.Contig3_All	0.99	1.11	1.07	0.43	0.5	0.5
CL10827.Contig5_All	1.42	1.25	1.28	0.57	0.52	0.55
CL10828.Contig1_All	4.18	4.45	5.88	7.8	6.04	8.02
CL10828.Contig2_All	23.32	21.41	21.2	32.21	32.51	30.48
CL10828.Contig3_All	17.76	18.91	20.89	18.32	15.45	17.29
CL10829.Contig1_All	0	0	0	0.34	0.75	0.12
CL10829.Contig3_All	0	0	0	0.7	0.55	0.95
CL1083.Contig10_All	7.99	9.27	9.39	5.03	6.55	8.05
CL1083.Contig1_All	0.5	0.84	0.61	1.72	1.68	1.53
CL1083.Contig4_All	3.43	2.91	3.26	2.72	2.74	2.37
CL1083.Contig6_All	1.37	1.24	1.21	0.41	0.5	0.27
CL10830.Contig1_All	2.01	1.6	1.72	3.92	3.89	3.83
CL10830.Contig2_All	5.88	6.27	5.9	1.82	1.81	1.86
CL10832.Contig1_All	1.38	1.32	1.18	0.76	0.55	0.76
CL10833.Contig2_All	4.25	4.24	4.16	10.21	9.17	9.29
CL10834.Contig1_All	0	0	0	4.91	1.93	3.99
CL10834.Contig2_All	0.35	0	0	2.31	2.53	2.46
CL10835.Contig1_All	67.91	67.99	67.63	44.53	42.98	47.93
CL10836.Contig1_All	1.4	1.11	1.41	0.61	0.83	0.23
CL10836.Contig2_All	0.98	0.78	0.24	0	0	0
CL10836.Contig3_All	8.83	8.6	11.08	3.14	2.37	3.32
CL10836.Contig4_All	1.78	1.33	2.08	0.01	0.57	0.6
CL10838.Contig1_All	0.87	0.91	0.55	0.17	0.33	0.09
CL10839.Contig1_All	19.22	18.81	20.93	15.89	18.76	20.12
CL10839.Contig2_All	5.14	5.86	5.86	12.92	13.59	16.67
CL10839.Contig4_All	0	0	0	2.37	1.54	2.3
CL10839.Contig5_All	1.27	1.38	1.29	3.27	3.12	2.92
CL1084.Contig4_All	20.22	20.88	20.35	16.74	15.83	16.12
CL10841.Contig2_All	3.03	1.62	0.98	0	0	0
CL10842.Contig2_All	1.33	1.5	0.73	2.87	3.41	3.21
CL10844.Contig2_All	1.44	1.57	2.13	3.23	2.75	2.71
CL10844.Contig3_All	0.68	0.75	1.06	1.62	1.47	1.69
CL10844.Contig4_All	1.74	2.67	2.4	4.84	4.76	4.41
CL10844.Contig8_All	1.79	1.68	1.82	0.96	1.35	1
CL10845.Contig2_All	7.61	7.73	5.56	14.58	15.78	15.13
CL10845.Contig3_All	13.08	14.81	13.75	5.59	4.82	5.25
CL10847.Contig1_All	2.63	3.69	3.86	0	0	0
CL10848.Contig2_All	1.38	1.06	1.78	0	0	0.54
CL10848.Contig3_All	3.7	5	5.19	2.44	3.3	3.4
CL10848.Contig5_All	1.32	1.92	2.45	5.72	5.16	6.44
CL1085.Contig10_All	0.1	0.17	0.16	1.69	1.09	1.14
CL1085.Contig2_All	0	0	0	0.78	0.5	0.96
CL1085.Contig9_All	0.81	1.31	1.39	2.59	2.15	2.48
CL10850.Contig1_All	0.48	0.59	0.48	0.17	0.05	0.11
CL10851.Contig1_All	1.2	0.69	0.85	0.6	0.37	0.22
CL10854.Contig1_All	7.52	7.49	7.33	3.64	5.17	3.55
CL10855.Contig2_All	0.94	1.63	0.49	2.74	2.91	3.57
CL10855.Contig5_All	0	1.06	1.49	0	0	0
CL10857.Contig5_All	0.49	0.49	0.53	0.14	0.17	0.18
CL10859.Contig2_All	0.59	0.77	0.34	9.02	9.62	9.48
CL10859.Contig3_All	2.93	2.24	2.15	1.62	0.95	1.45
CL10859.Contig4_All	1.06	1.28	0.76	2.7	2.87	2.05
CL1086.Contig3_All	8.4	10.07	8.69	15.83	18.56	16.38
CL1086.Contig5_All	7.72	8.01	7.22	6.35	6.43	7.21
CL1086.Contig8_All	2.69	1.93	2.53	5.58	6.62	7.71
CL10860.Contig3_All	0.47	0.68	0.58	3.66	3.23	3.46
CL10860.Contig4_All	0.96	0.78	0.73	0.36	0.22	0.26
CL10861.Contig2_All	0	0.11	0.13	2.57	1.86	1.73
CL10861.Contig3_All	3.72	3.23	4.16	2.71	2.38	2.21
CL10861.Contig4_All	11.17	11.06	10.29	16.85	16.96	17.79
CL10862.Contig1_All	13.45	11.43	12.57	8.89	9.18	10.88
CL10862.Contig2_All	45.84	46.41	51.55	39.07	43.98	42.22
CL10863.Contig1_All	0	0	0	1.66	0.32	1.06
CL10864.Contig2_All	1.66	1.82	1.42	0.81	0.77	0.62
CL10864.Contig3_All	12.24	12.56	13.34	10.71	10.75	10.88
CL10865.Contig2_All	2.5	2.42	2.77	2.2	1.31	2.25
CL10866.Contig3_All	12.48	11.48	12.23	20.88	22.21	21.41
CL10867.Contig3_All	9.97	9.28	10.24	14.23	15.11	16.29
CL10867.Contig4_All	121.67	124.09	121.99	187.11	191.01	194.15
CL10867.Contig5_All	0.53	0.11	0.23	16.98	16.89	15.33
CL10868.Contig2_All	0.91	0.93	0.83	3.33	2.93	3.97
CL10869.Contig2_All	1.8	2.35	1.09	0	0	0.37
CL10869.Contig4_All	0.16	0.18	0	1.07	1.93	0.99
CL10870.Contig2_All	32.7	33.98	35.35	26.85	24.14	21.45
CL10870.Contig5_All	58.97	68.22	63.55	56.78	52.56	57.2
CL10870.Contig6_All	0.47	0.49	0.38	3.4	3.75	4.16
CL10872.Contig2_All	0	0	0	2.93	0.91	1.39
CL10875.Contig2_All	0.19	0.7	0.73	2.25	2.39	1.49
CL10877.Contig1_All	8.87	6.2	6.47	5.7	6.15	4.57
CL10877.Contig2_All	46.34	50.66	49.02	46.03	50	49.93
CL10877.Contig3_All	28.44	33.12	29.77	41.99	39.87	40.94
CL10878.Contig3_All	12.84	7.66	12.45	42.86	46.97	47.19
CL10878.Contig6_All	59.36	59.52	52.04	51.56	46.54	60.49
CL10879.Contig1_All	0.65	1.02	0.81	0.12	0	0
CL10879.Contig2_All	0.8	1.05	2.4	0.15	0.36	0.11
CL10879.Contig3_All	1.68	1.18	1.65	3.62	4.18	5.21
CL1088.Contig1_All	1.25	1.17	0.59	3.41	3.81	3.54
CL1088.Contig2_All	0.3	0.48	0.47	2.23	2.83	2.47
CL1088.Contig3_All	38.97	37.7	43.58	61.75	55.72	54.2
CL1088.Contig4_All	0.1	0	0	8.24	9.24	7.61
CL1088.Contig6_All	0.81	0.88	0.81	3.35	5.83	5.78
CL1088.Contig7_All	2.48	1.56	1.72	14.59	14.88	15.07
CL1088.Contig8_All	0.1	0.22	0	7.08	5.99	4.48
CL1088.Contig9_All	1.77	2.12	2.61	1.49	1.27	0.79
CL10882.Contig2_All	0.72	0.61	0.71	5.57	5.03	5.4
CL10883.Contig2_All	1.26	1.4	1.27	0.75	0.66	0.45
CL10884.Contig1_All	0.6	1.02	0.73	0.25	0.14	0
CL10885.Contig3_All	19.35	20.44	19.09	14.33	11.47	13.92
CL10885.Contig6_All	1.74	1.77	1.71	9.97	9.7	11.5
CL10886.Contig2_All	0.22	0.23	0.42	2.59	3.27	3.95
CL10887.Contig3_All	6.69	7.46	6.47	5.72	5.12	6.24
CL10887.Contig4_All	6.43	7.54	6.73	5.51	4.71	5.31
CL10888.Contig2_All	3.52	3.33	3.64	1.62	1.35	1.72
CL10889.Contig2_All	0.8	0.63	0.39	2.46	1.93	2.77
CL1089.Contig1_All	0.63	1.1	0.26	1.66	2.45	1.47
CL1089.Contig2_All	1.6	1.14	1.36	0.35	0.49	0.46
CL1089.Contig3_All	2.72	2.4	2.43	5.53	4.07	4.19
CL10890.Contig1_All	1.97	2.91	3.12	0.18	0.4	0.64
CL10891.Contig2_All	13.67	15.85	14.66	22.47	22.01	22.96
CL10892.Contig1_All	0.57	0.5	0.55	0	0	0
CL10892.Contig2_All	4.55	4.01	4.4	3.22	2.97	2.42
CL10893.Contig1_All	3.92	3.92	3.64	0.15	0.14	0
CL10893.Contig2_All	5.83	4.92	6.7	18.47	19.17	20.32
CL10895.Contig1_All	0	0	0	1.92	1.79	1.74
CL10895.Contig3_All	28.59	32.31	31.52	26.22	25.88	27.4
CL10896.Contig2_All	2.8	2.72	2.07	4.71	5.23	5.61
CL10897.Contig1_All	0	0.61	0.55	9.34	11.5	9.57
CL10897.Contig2_All	0.91	0.86	1.41	3.92	2.26	4.2
CL10898.Contig2_All	2.68	2.14	2.74	0.47	0.53	0.61
CL10899.Contig1_All	9.19	10.57	10.82	16.46	14.95	16.41
CL10899.Contig2_All	0.67	1.01	0.66	0.58	0.34	0.18
CL109.Contig11_All	0.18	0.15	0.14	0.76	0.63	0.8
CL109.Contig15_All	0.31	0.38	0.41	0.71	1.21	1.43
CL109.Contig1_All	12.55	12.25	12.72	0.68	0.81	0.39
CL109.Contig4_All	0	0.26	0.09	3.53	2.65	3.06
CL109.Contig5_All	0	0	0	1.03	0.85	0.18
CL109.Contig9_All	2.86	2.64	3.88	0.12	0.08	0.08
CL1090.Contig3_All	0	0	0	1.09	0.52	0.57
CL1090.Contig5_All	2.01	2.51	1.49	0.74	0.38	0.23
CL10900.Contig1_All	18.63	17.08	18.15	45.57	45.73	35.99
CL10900.Contig2_All	28.52	26.04	33.78	11.29	10.51	10.01
CL10900.Contig3_All	57.88	53.22	55.72	47.27	49.36	40.75
CL10901.Contig1_All	0.66	0.65	1.17	0.34	0.13	0.23
CL10902.Contig1_All	2.74	2	1.1	0.29	0.07	0.31
CL10903.Contig2_All	2.41	2.8	2.67	1.35	1.34	1.75
CL10904.Contig1_All	1	1.78	2.16	0	0	0
CL10906.Contig1_All	4.08	3.85	3.3	0.91	1.82	1.6
CL10907.Contig1_All	0	0	0.12	1.09	0.91	0.76
CL10907.Contig4_All	2.59	2.15	1.8	0.16	0.33	0.08
CL10908.Contig1_All	1.09	0.96	1.11	7.81	8.88	8.71
CL10908.Contig2_All	0.39	0	0.34	0	0.07	0
CL10908.Contig3_All	1.09	0.74	1	0.31	0.66	0.57
CL10908.Contig4_All	2.07	2.79	1.94	0.83	0.85	0.88
CL10908.Contig5_All	4.35	4.58	4.75	2.53	1.95	2.72
CL10909.Contig1_All	0.18	0	0	4.21	4.24	4.76
CL10909.Contig4_All	1.05	2.05	1.44	5.15	6.07	5.18
CL10910.Contig2_All	2.95	2.89	2.65	0.94	1.02	0.87
CL10910.Contig3_All	0.16	0	0.28	1.26	1.43	1.35
CL10911.Contig1_All	0	0	0	0.36	1.08	0.56
CL10912.Contig2_All	0.69	1.01	1.08	1.83	1.99	1.78
CL10912.Contig3_All	3.96	4.18	4.08	7.06	6.87	8.52
CL10914.Contig3_All	8.37	8.94	7.8	5.83	5.46	5.03
CL10914.Contig4_All	0.97	0.92	2.07	0.82	0.36	0.36
CL10914.Contig5_All	1.76	1.5	1.27	0.47	0.69	0.15
CL10914.Contig6_All	2.32	2.41	2.02	1.05	0.95	2.41
CL10916.Contig1_All	90.08	95.31	92.85	2.21	1.48	2.38
CL10917.Contig10_All	5.46	5.24	5.49	1.65	1.78	1.82
CL10917.Contig1_All	0	0.02	0	1.66	1.25	1.86
CL10917.Contig2_All	0.06	0.17	0.09	3.74	3.56	3.6
CL10917.Contig3_All	1.56	2.4	1.92	3.83	4.01	4.18
CL10917.Contig5_All	0.11	0.38	0.2	1.02	0.71	0.82
CL10917.Contig9_All	1.92	2.09	2.37	3.3	4.27	3.69
CL10919.Contig1_All	0	0.23	0	1.48	1.39	1.83
CL1092.Contig1_All	6.33	6.49	8.08	12.74	15.64	13.07
CL1092.Contig2_All	0.9	0.56	0.67	5.52	4.7	3.99
CL1092.Contig3_All	1.07	1.37	1.05	2.44	2.94	3.11
CL10920.Contig2_All	3.99	3.97	4.27	5.91	5.25	7.52
CL10921.Contig1_All	5.95	6.14	6.59	20.44	19.91	22.03
CL10922.Contig1_All	13.42	12.53	14.5	12.42	11.78	11.87
CL10922.Contig3_All	15.13	16.52	15.42	11.18	15.41	16.17
CL10922.Contig4_All	2.29	1.04	1.85	0.68	0.59	0.23
CL10922.Contig5_All	7.96	8.52	7.88	6.17	5.85	6.63
CL10922.Contig9_All	64.06	60.03	66.06	57.2	56.18	55.96
CL10924.Contig3_All	4.03	4.09	3.38	5.99	6.25	6.78
CL10924.Contig5_All	3.76	3.11	4.27	2.95	3.24	3.33
CL10924.Contig9_All	0	0	0.05	0.55	0.71	0.53
CL10926.Contig2_All	0	0	0	1.54	0.72	3.24
CL10927.Contig1_All	2.49	2.73	3.39	1.09	2.33	0.98
CL10927.Contig3_All	1.9	1.26	1.09	3.82	3.19	4.21
CL10928.Contig2_All	0	0	0	2.24	2.33	1.31
CL1093.Contig2_All	1.89	1.63	2.9	0	0.41	0.53
CL1093.Contig3_All	14.17	16.32	14.78	5.81	7.88	8.15
CL1093.Contig4_All	4.32	1.14	4.05	12.71	12.82	13.42
CL10931.Contig1_All	0.17	0.24	0.24	1.69	0.7	1.43
CL10932.Contig1_All	0	0	0	1.61	1.51	1.15
CL10934.Contig10_All	23.02	21.86	22.37	17.39	21.31	16.54
CL10934.Contig2_All	2.59	2.47	1.43	10.14	10.67	9.54
CL10934.Contig3_All	2.63	2.26	3.84	7.65	6.58	8.6
CL10934.Contig4_All	0.18	0.42	0.25	1.45	2.26	2.05
CL10934.Contig5_All	0.22	0.59	0	0.73	0.94	2.32
CL10934.Contig6_All	0	0	0	11	9.85	8.34
CL10934.Contig7_All	23.26	20.75	19.55	7.52	8.35	10.77
CL10934.Contig8_All	13.52	14.54	14.61	27.06	24.22	22.57
CL10936.Contig1_All	1.79	1.8	2.06	0.99	0.79	0.97
CL10937.Contig1_All	0.41	1.11	0.84	0.44	0.36	0.61
CL10937.Contig2_All	4.58	4.54	4.62	1.83	1.31	1.63
CL10937.Contig3_All	2.98	2.03	1.99	6.22	5.88	6.96
CL1094.Contig1_All	1.66	2.21	2.48	0	0	0
CL1094.Contig2_All	4.4	4.07	4.19	3.47	3.35	2.53
CL1094.Contig5_All	1.82	2.08	1.8	0	0.13	0
CL1094.Contig6_All	1.87	1.95	2.38	1.41	1.37	1.65
CL1094.Contig7_All	9.72	7.94	10.82	7.9	7.72	7.98
CL10943.Contig3_All	2.3	3.06	2.89	1.72	1.07	1.96
CL10943.Contig4_All	0	0	0	0.55	0.06	0.16
CL10943.Contig5_All	7.25	6.39	7.38	2.95	3.54	2.12
CL10944.Contig1_All	14.37	15.67	13.81	7.74	6.96	6.38
CL10944.Contig2_All	2.41	2.64	2.8	9.29	8.95	9.3
CL10944.Contig3_All	4.14	4.41	3.71	1.54	1.69	1.21
CL10946.Contig4_All	3.7	3.88	3.92	1.73	2.1	1.63
CL10949.Contig1_All	1.98	2.5	1.76	0.15	0	0
CL10949.Contig2_All	10.23	10.9	10.31	4.54	4.77	5.14
CL10949.Contig3_All	0.03	0.03	0	11.05	10.31	12.57
CL10949.Contig4_All	1.93	1.78	1.97	3.13	3.87	3.69
CL1095.Contig1_All	11.01	10.46	11.87	1.33	2.45	1.74
CL1095.Contig2_All	4.99	5.49	3.7	16.49	18.81	15.31
CL1095.Contig5_All	7.94	7.82	8.02	7.43	5.62	4.06
CL10950.Contig1_All	0.26	0.35	1.02	4.45	4.45	3.14
CL10951.Contig3_All	6.2	5.74	6.41	3.35	3.95	3.39
CL10951.Contig4_All	3.64	3.13	3.37	2.59	2.86	3.31
CL10951.Contig5_All	4.52	4.12	4.15	1.96	2.21	2.17
CL10952.Contig1_All	5.45	5.78	4.96	1.88	1.16	2.3
CL10953.Contig1_All	4.14	4.56	3.61	0.57	0.6	0.5
CL10953.Contig2_All	0.79	0.66	1.27	3.32	3.63	3.88
CL10954.Contig1_All	1.38	1.04	1.25	4.93	4.78	2.86
CL10954.Contig2_All	5.92	9.41	8.75	4.34	3.5	3.82
CL10954.Contig3_All	6.77	4.26	5.15	3.63	3.99	4.8
CL10956.Contig1_All	1.43	1.89	1.49	0.43	0.64	0.26
CL10957.Contig1_All	3.21	2.45	2.13	0.86	0.81	0.86
CL10957.Contig2_All	2.18	2.71	2.22	0.12	0.15	0.17
CL10958.Contig2_All	8.95	9.27	8.5	5.92	6.49	7.27
CL10958.Contig3_All	11.31	11.94	12.84	7.03	9.64	8.39
CL10958.Contig4_All	5.51	6.45	6.27	2.56	4.41	3
CL10958.Contig5_All	30.4	31.39	28.9	24.44	24.55	23.69
CL1096.Contig1_All	0.54	0.48	0.17	0	0.15	0.11
CL1096.Contig2_All	0.11	0.36	0.17	0.75	1.18	0.9
CL1096.Contig3_All	1.11	1.24	1.18	4.01	3.21	3.1
CL1096.Contig4_All	0.92	0.84	0.95	2.18	1.94	1.95
CL1096.Contig6_All	3.18	2.93	3.35	1.59	1.92	1.75
CL1096.Contig8_All	1.45	1.43	1.31	2.94	2.11	3
CL10960.Contig1_All	0.4	0.73	0.4	2.67	1.83	2.39
CL10961.Contig1_All	3.52	4.81	5.2	11.16	11.02	9.6
CL10961.Contig3_All	10.38	10.23	10.22	1.55	3.11	3.43
CL10962.Contig1_All	0	0	0.18	3.23	4.62	3.39
CL10962.Contig2_All	3.72	4.47	2.92	38.46	41.24	37.86
CL10965.Contig2_All	12.59	12.53	11.71	9.28	9.89	9.2
CL10965.Contig5_All	15.72	16.07	18.23	14.72	15.15	16.44
CL10966.Contig2_All	8.53	7.76	7.96	3.05	2.83	3.08
CL10968.Contig1_All	0.73	0.53	0.9	2.3	3.89	2.35
CL10968.Contig5_All	10.76	11.61	11.62	22	17.89	18.33
CL10968.Contig7_All	2.3	3.24	2.36	1.31	1.21	1.84
CL10968.Contig8_All	2.61	3.32	3.1	5.76	6.11	4.87
CL1097.Contig2_All	17.87	19.31	20.87	17.67	16.92	17.82
CL1097.Contig3_All	10.22	9.5	9.79	8.85	9.54	9.75
CL1097.Contig5_All	15.23	18.09	14.02	14.3	13.85	16.32
CL10970.Contig2_All	5.83	7.98	5.69	20.66	18.49	23.72
CL10971.Contig1_All	370.12	389.87	374.61	370.17	393	391.6
CL10971.Contig2_All	106.86	109.2	113.53	645.18	692.49	642.07
CL10971.Contig4_All	661.29	687.81	694.57	1341.3	1410.66	1382.82
CL10974.Contig2_All	0.23	0.19	0.3	1.65	2.06	1.59
CL10975.Contig2_All	11.78	11.8	12.06	19.17	19.9	21.85
CL10976.Contig3_All	35.6	33.68	35.44	62.26	66.07	63.47
CL10976.Contig4_All	1.41	1.26	1.04	4.41	4.76	5
CL10976.Contig5_All	0	0.24	0.12	7.27	7.16	8.15
CL10976.Contig6_All	45.8	42.92	46.59	119.99	114.35	107.41
CL10976.Contig7_All	72.88	71.38	75.5	128.77	132.75	137.86
CL10977.Contig1_All	142.04	145.04	147.45	39.95	36.22	39.6
CL10978.Contig1_All	0.24	0.96	0.39	1.83	2.39	1.53
CL10979.Contig2_All	1.85	2.08	1.88	1.05	0.96	1.42
CL10979.Contig4_All	0.67	0.7	0.48	2.31	2.43	2.52
CL1098.Contig1_All	4.47	5.02	3.58	0.94	1.93	1.47
CL1098.Contig7_All	12.77	13.29	12.92	20.21	18.3	19.58
CL10980.Contig2_All	0.92	1.21	1.95	0	0	0
CL10982.Contig1_All	0	0	0	1.58	1.43	1.18
CL10982.Contig2_All	15.16	14.86	14.67	12.33	14.91	13.32
CL10982.Contig5_All	19.29	20.84	20.9	28.72	28.39	25.95
CL10983.Contig1_All	23.28	23.01	22.53	9.72	10.26	10.86
CL10983.Contig3_All	21.89	20.03	22.07	12.76	14.91	13.13
CL10983.Contig5_All	15.97	18.73	17.27	15.03	15.14	16.34
CL10985.Contig2_All	0.19	0.2	0.58	0	0.06	0
CL10986.Contig2_All	35.9	32.52	34.14	2.03	2.48	1.98
CL10988.Contig2_All	2.7	3.04	2.5	0.36	0.71	0.64
CL10988.Contig3_All	1.35	2.03	1.45	0.78	0.76	0.68
CL10989.Contig1_All	8.27	8.04	7.78	15.33	16.21	16.13
CL10989.Contig3_All	17.16	15.6	17.28	7.19	8.18	8.03
CL1099.Contig1_All	0.52	0.83	0.6	1.31	2.34	2.11
CL1099.Contig2_All	0	0.12	0.12	0.3	0.98	0.64
CL10990.Contig1_All	0	0	0	3.26	3.83	3.78
CL10992.Contig1_All	138.78	143.78	140.72	112.56	115.74	116.8
CL10992.Contig2_All	83.61	90.07	90.15	48	49.58	52.63
CL10992.Contig3_All	91.28	98.21	90.03	160.97	167.35	163.75
CL10992.Contig4_All	121.19	128.54	131.97	96.67	99.44	105.23
CL10993.Contig1_All	10.94	11.91	10.8	2.53	2.85	2.72
CL10993.Contig2_All	0.38	0.36	0.29	2.09	3.15	2.49
CL10993.Contig3_All	0.12	0.25	0.49	1.08	1.24	1.76
CL10993.Contig4_All	2.16	2.3	2.4	13.17	12.12	15.67
CL10995.Contig2_All	0.45	0.81	0.49	0	0	0
CL10995.Contig5_All	0.68	1.13	1.04	5.13	5.31	6.19
CL10995.Contig6_All	7.35	7.82	7.57	7.17	6.79	6.22
CL10995.Contig8_All	1.22	0.92	0.74	0.1	0.15	0
CL10998.Contig2_All	0.33	0.15	0	5.17	7.3	4.41
[truncated: 60,860 more rows]

## Sheet: E1 vs M1
Gene ID	E1_r1 FPKM	E1_r2 FPKM	E1_r3 FPKM	M1_r1 FPKM	M1_r2 FPKM	M1_r3 FPKM
CL1.Contig2_All	0.34	0.24	0.38	0	0	0
CL1.Contig3_All	0.67	0.46	0.49	1.83	2.09	2.31
CL1.Contig4_All	1.36	1.16	1.11	8.02	7.84	6.31
CL10.Contig3_All	2.94	2.15	2.57	9.42	8.6	7.87
CL10.Contig4_All	8.28	9.69	10.16	16.29	15.91	18.28
CL100.Contig6_All	0.4	0.26	0.38	0.83	1.37	1.45
CL1000.Contig2_All	2.87	3.23	4.27	7.74	8.22	7.89
CL1000.Contig3_All	2.49	3.12	2.99	6.04	6.79	5.28
CL1000.Contig4_All	5	4.89	4.34	11.48	13.14	11.91
CL10000.Contig1_All	2.03	1.91	1.26	0	0	0
CL10000.Contig2_All	2.83	3.5	3.36	0.99	0.79	0.62
CL10000.Contig3_All	7.23	8.11	6.66	4.5	4.55	4.79
CL10001.Contig1_All	0.75	0.41	0.22	1.17	1.08	1.65
CL10001.Contig2_All	0.58	0.57	0.28	1.7	1.62	1.99
CL10001.Contig3_All	0.21	0.17	0.22	0	0	0
CL10001.Contig4_All	1.83	1.6	2.22	3.23	3.77	2.94
CL10001.Contig6_All	0.65	1.11	0.92	1.8	1.99	2.17
CL10002.Contig2_All	3.25	2.68	1.69	0.61	0.89	0.81
CL10002.Contig3_All	0.65	1.01	1.25	4.81	4	3.64
CL10003.Contig1_All	1.43	1.82	2.26	29.11	27.12	30.81
CL10003.Contig2_All	47.11	41.82	48.24	2.93	2.94	2.24
CL10004.Contig2_All	3.28	4.22	3.45	0	0.14	0
CL10004.Contig3_All	0.1	0.36	0.16	2.05	3.16	1.79
CL10005.Contig2_All	6.48	5.09	5.22	0.24	0.08	0
CL10005.Contig3_All	2.98	1.77	1.3	6.29	7.59	6.81
CL10007.Contig2_All	0.53	0.68	0.89	0.21	0.08	0.33
CL10008.Contig1_All	0	0	0	0.82	2.3	2.68
CL10008.Contig3_All	3.67	3.12	4.37	6.97	7.68	8.05
CL10009.Contig2_All	0.68	0.7	0.7	2	1.69	2.41
CL10009.Contig3_All	1.42	2.21	1.76	0.15	0	0.44
CL10009.Contig4_All	2.19	2.31	2.25	1.37	1.97	1.66
CL1001.Contig10_All	5.75	5	5.72	3.91	4.98	4.24
CL1001.Contig11_All	2.46	2.02	1.59	0.87	0.88	0.86
CL1001.Contig12_All	1.94	1.62	1.83	1.73	0.97	1.36
CL1001.Contig14_All	0	0	0	2.21	2.24	2.72
CL1001.Contig15_All	4.83	4.88	5.67	1.19	0.7	0.82
CL1001.Contig18_All	2.34	2.63	2.49	7.06	6.56	5.19
CL1001.Contig1_All	1.65	1.68	0.79	5.9	5.86	5.21
CL1001.Contig20_All	1.33	1.39	1.33	5.63	5.83	4.66
CL1001.Contig22_All	13.24	16.18	13.9	14.1	13.36	11.56
CL1001.Contig23_All	2.33	2.56	3.14	9.95	10.66	9.47
CL1001.Contig24_All	18.61	19.04	19.57	29.22	26.46	27.39
CL1001.Contig25_All	10.29	13.55	13.69	20.59	20.63	20.34
CL1001.Contig26_All	1.18	2.39	2.41	0.63	0.55	0.48
CL1001.Contig27_All	8.89	9.28	8.14	3.14	2.61	2.8
CL1001.Contig28_All	61	61.08	59.79	33.69	35.6	34.93
CL1001.Contig29_All	0.37	0.26	0.46	0	0	0
CL1001.Contig2_All	4.05	4.3	3.72	2.46	3.24	2.49
CL1001.Contig3_All	6.61	6.47	7.05	4.52	3.97	4.19
CL1001.Contig4_All	8.3	7.88	8.76	3.87	3.31	3.32
CL1001.Contig6_All	5.42	5.53	4.61	1.47	1.68	1.97
CL1001.Contig8_All	7.02	8.1	9.02	7.78	7.83	7.08
CL1001.Contig9_All	3.14	4.3	3.43	6	7.1	6.11
CL10010.Contig1_All	4.32	4.43	4.51	34.53	33.33	33.16
CL10010.Contig2_All	56.45	59.52	58.3	19.26	18.13	24.25
CL10010.Contig3_All	4.39	5.02	4.79	22.02	24.04	23.82
CL10010.Contig4_All	28.43	30.56	29.64	8	8.83	7.44
CL10010.Contig5_All	35.31	36.85	34.21	34.37	33.97	34.25
CL10010.Contig7_All	1.42	0.98	0.78	3.34	4.94	4.22
CL10011.Contig2_All	30.91	29.92	33.04	15.23	16.59	15.94
CL10013.Contig1_All	2.72	2.27	2.75	0.11	0.05	0.09
CL10013.Contig2_All	1.72	1.08	1.1	0	0	0
CL10013.Contig3_All	0.3	0.34	0.27	2.01	1.36	2.01
CL10013.Contig4_All	3.12	2.95	2.79	2.03	1.94	1.5
CL10013.Contig5_All	1.27	0.87	0.72	1.89	2.04	2.43
CL10013.Contig6_All	1.11	0.51	0	7.48	8.43	7.54
CL10013.Contig7_All	1.56	1.7	1.25	0	0.01	0
CL10013.Contig9_All	6.74	7.42	5.27	1.9	2.92	3.44
CL10015.Contig1_All	3.42	3.53	2.67	0	0	0
CL10015.Contig2_All	0.41	0.24	0.49	1.38	1.3	1.19
CL10015.Contig4_All	1.56	1.24	1.45	3.78	3.05	3.57
CL10016.Contig1_All	0.71	1.21	0.56	4.05	3.25	4.92
CL10016.Contig3_All	6.38	7.93	7.12	3.59	2.93	3.57
CL10019.Contig1_All	0.5	0.24	0.76	0.12	0	0
CL10019.Contig2_All	1.63	1.05	2.05	0.3	0.13	0.06
CL10019.Contig3_All	1.5	1.75	1.32	6.25	7.09	5.71
CL10019.Contig4_All	4.43	4.47	4.78	3.44	3.81	4.71
CL10019.Contig6_All	1.37	1.41	1.33	4.18	4.21	3.8
CL1002.Contig1_All	2.63	3.84	3.77	62.87	67.93	65.32
CL1002.Contig2_All	0	0	0.05	43.52	38.61	41.2
CL1002.Contig3_All	32.59	32.83	28.38	0.35	0.54	0.54
CL1002.Contig4_All	106.64	102.79	100.27	22.57	24.1	22.47
CL1002.Contig5_All	106.19	109.49	112.51	44.28	44.39	44.06
CL10020.Contig1_All	0.2	0.62	0.63	0	0	0
CL10020.Contig2_All	1.92	2	1.84	0.51	0	0
CL10020.Contig3_All	0.47	0.21	0.48	1.94	3.11	3
CL10021.Contig10_All	2.85	3.65	2.77	0	0	0
CL10021.Contig11_All	25.44	30.81	27.21	0	0	0
CL10021.Contig12_All	0.99	1.33	1.19	0	0	0
CL10021.Contig13_All	4.86	6.69	4.62	0	0	0.11
CL10021.Contig14_All	1.89	1.64	1.42	0.63	0.44	0.48
CL10021.Contig15_All	2.94	3.39	2.67	0	0	0
CL10021.Contig16_All	3.22	3.93	3.89	0	0	0
CL10021.Contig17_All	11.78	10.77	10.38	22.45	23.94	24.71
CL10021.Contig18_All	0.46	0.48	0	18.97	16.36	17.63
CL10021.Contig1_All	3.89	4.58	3.34	0	0	0
CL10021.Contig20_All	0.26	0.09	1.02	4.65	6.77	6.87
CL10021.Contig22_All	0	0	0.05	3.37	2.53	1.49
CL10021.Contig23_All	7.07	8.43	7.72	0.13	0.38	0.18
CL10021.Contig24_All	36.11	35.98	32.69	32.08	34.46	38.57
CL10021.Contig25_All	64.39	63.67	63.48	60.78	61.32	61.1
CL10021.Contig26_All	17.91	16.26	16.04	12.42	12.49	11.53
CL10021.Contig27_All	2.02	2.47	3.41	0	0	0
CL10021.Contig6_All	1.51	0.98	1.56	0.08	0.16	0
CL10021.Contig8_All	0.8	0.8	0.74	0	0	0
CL10022.Contig1_All	4.37	4.09	3.38	0.58	0.38	0.82
CL10022.Contig4_All	2.83	2.19	2.85	0.83	0.75	0.64
CL10023.Contig1_All	0.48	0.27	0.89	5.02	5.39	5.7
CL10023.Contig2_All	7.15	7.04	6.43	5.56	6.17	5.43
CL10024.Contig1_All	1.65	0.99	1.75	4.25	3.58	2.84
CL10024.Contig2_All	4.64	3.72	4.32	2.41	4.09	2.37
CL10026.Contig1_All	2.37	2.27	2.14	1.79	1.69	1.62
CL10026.Contig2_All	2.11	2	1.34	7.36	6.32	7.12
CL10026.Contig3_All	7.82	8.16	9.05	3.82	2.83	2.82
CL10026.Contig4_All	11.53	12.94	11.33	7.12	8.31	7.75
CL10027.Contig1_All	1.66	1.5	2.52	0	0	0
CL10028.Contig2_All	2.02	2.8	3	1.27	1.21	1.1
CL10029.Contig2_All	8.08	8.05	7.73	3.72	3.55	3.8
CL10029.Contig3_All	10.39	12.15	11.42	8.4	7.49	6.86
CL1003.Contig1_All	19.44	21.69	17.59	88.56	85.77	88.56
CL1003.Contig2_All	70.33	68.69	80.36	44.05	43.34	46.19
CL1003.Contig3_All	33.18	30.6	34.12	8.99	9.74	9.92
CL10030.Contig1_All	0	0	0	3.44	3.27	4.69
CL10030.Contig2_All	16.45	16.89	14.98	27.9	33.46	34.22
CL10032.Contig1_All	0	0.08	0	0.94	0.84	0.64
CL10032.Contig2_All	0.09	0	0.17	0.72	0.48	1.29
CL10033.Contig2_All	2.68	1.89	2.49	0.91	1.17	0.54
CL10033.Contig3_All	6.94	7.44	7.94	7.49	7.83	6.7
CL10035.Contig1_All	3.71	4.14	4.41	0	0.11	0
CL10036.Contig2_All	3.66	3.49	3.88	0.69	0.44	0.42
CL10036.Contig3_All	10.89	10.03	13.86	7.69	8.12	8.48
CL10036.Contig4_All	16.67	16.36	15.96	34.38	36.8	37.87
CL10037.Contig10_All	0.58	0.39	0.58	0	0	0
CL10037.Contig12_All	0.63	1.28	0.89	2.25	1.4	2.09
CL10037.Contig13_All	0.53	0.31	0.26	0.09	0.22	0.14
CL10037.Contig14_All	0.46	0.65	0.4	0	0	0
CL10037.Contig16_All	0.06	0	0.22	0	0	0
CL10037.Contig18_All	0.47	0.58	0.46	0	0.05	0
CL10037.Contig19_All	0.1	0.05	0.19	2.01	2.74	1.84
CL10037.Contig1_All	1.64	1.32	0.84	0.2	0.12	0.2
CL10037.Contig20_All	0.44	0.57	0.28	0.03	0.05	0.08
CL10037.Contig23_All	0.33	0.12	0.12	3.2	2.57	3.3
CL10037.Contig24_All	0.06	0.06	0	2.35	2.82	2.84
CL10037.Contig26_All	0.9	1.6	1.79	0	0	0
CL10037.Contig29_All	0	0.09	0.09	3.35	3.83	2.84
CL10037.Contig2_All	0.09	0.04	0	0.79	1.04	0.9
CL10037.Contig30_All	0.78	0.46	0.67	1.61	1.32	1.44
CL10037.Contig31_All	0	0	0	3.54	2.61	2.64
CL10037.Contig32_All	3.02	2.04	2.3	2.16	2.17	1.85
CL10037.Contig37_All	18.35	17.98	19.27	19.27	20.66	20.91
CL10037.Contig38_All	5.16	5.6	3.14	0	0	0
CL10037.Contig3_All	0.49	0.27	0	0	0	0
CL10037.Contig41_All	0.06	0.47	0.21	0	0	0
CL10037.Contig43_All	3	2.22	2.35	0.16	0	0
CL10037.Contig4_All	1.88	1.68	3.1	0	0	0
CL10037.Contig6_All	0.24	0.07	0.06	1.35	1.81	2.78
CL10037.Contig7_All	1.4	1.02	2.2	0	0	0
CL10038.Contig1_All	2.11	1.91	1.47	0.29	0.09	0.15
CL10038.Contig3_All	2.49	2.58	2.52	13.11	12.45	11.26
CL1004.Contig10_All	0.24	0.42	0.45	0.82	0.74	0.87
CL1004.Contig11_All	0.2	0.38	0.3	0.53	0.64	0.96
CL1004.Contig12_All	0.25	0.22	0.29	0.61	0.63	1.38
CL1004.Contig1_All	1.36	0.88	1.73	0.43	0.49	0.52
CL1004.Contig2_All	1.26	1.09	1.82	3.44	3.19	3.19
CL1004.Contig3_All	0.74	0.74	0.41	0.21	0.16	0.27
CL1004.Contig5_All	3.64	3.52	3.29	6.76	5.31	6.16
CL1004.Contig7_All	0.33	0.37	0.21	1.6	1.96	1.16
CL1004.Contig8_All	0.44	0.29	0.47	1.71	1.11	0.94
CL10040.Contig1_All	4.54	4.92	5.97	1.81	2.38	3.1
CL10040.Contig4_All	1.11	1.6	1.03	4.51	3.94	3.72
CL10040.Contig5_All	1.92	1.5	1.43	4.57	4.46	5.18
CL10041.Contig1_All	0.46	0.64	0.16	3.24	2.6	2.64
CL10042.Contig1_All	0.21	0.21	0	0.81	1.98	1.18
CL10042.Contig2_All	0.55	0.62	0.54	0	0	0
CL10042.Contig3_All	1.52	1.12	1.1	2.92	4.53	4.48
CL10043.Contig10_All	0	0	0.05	5.81	5.45	4.16
CL10043.Contig11_All	1.6	1.17	0.49	0	0	0
CL10043.Contig12_All	5.31	4.33	4.84	0.38	0.32	0.58
CL10043.Contig14_All	0.55	0.47	0.52	2.55	2.25	2.46
CL10043.Contig16_All	0.89	0.84	0.76	0.44	0.2	0.38
CL10043.Contig17_All	1.49	1.53	1.46	3.36	3.22	3.62
CL10043.Contig18_All	0.5	0.67	0.3	0.2	0.28	0.26
CL10043.Contig1_All	0.08	0.09	0.28	0	0	0
CL10043.Contig20_All	0.54	0.65	0	0	0	0
CL10043.Contig21_All	0.24	0.32	0.47	0.12	0.07	0.11
CL10043.Contig22_All	0.87	0.63	0.66	11.06	11.11	11.15
CL10043.Contig23_All	0.85	0.47	0.43	0.45	0.31	0.08
CL10043.Contig25_All	0.9	0.88	1.24	0.85	0.98	0.41
CL10043.Contig27_All	2.33	1.34	3.42	0	0.1	0.1
CL10043.Contig29_All	0.28	0	0.23	1.54	2.75	3.42
CL10043.Contig2_All	0.66	0.74	0.69	2.85	2.99	3.49
CL10043.Contig31_All	0.16	0.92	0.17	0.94	2.43	2.29
CL10043.Contig32_All	6.29	9.24	9.38	7.86	4.9	5.35
CL10043.Contig35_All	3.76	4.5	4.53	1.91	1.3	0.18
CL10043.Contig36_All	5.92	5.16	5.9	2.34	2.16	2.17
CL10043.Contig3_All	0.27	0.22	0.21	0	0	0
CL10043.Contig4_All	0.67	0.67	0.85	0.16	0.11	0.31
CL10043.Contig6_All	1.2	0.54	0.62	0	0.13	0
CL10043.Contig7_All	1.67	1.56	0.83	0.61	0.94	0.7
CL10044.Contig1_All	0.24	0.73	0.65	0.12	0.14	0
CL10044.Contig2_All	0.96	0.87	0.67	0	0	0.07
CL10044.Contig4_All	1.04	0.87	0.46	2.56	2.72	2.36
CL10045.Contig2_All	1.14	0.84	1.23	0	0.07	0.18
CL10045.Contig3_All	23	21.48	21.38	21.15	20.26	22.07
CL10046.Contig1_All	5.79	6.04	3.98	0.15	0.28	0
CL10047.Contig2_All	1.91	2.06	2.21	1.35	1.5	1.44
CL10047.Contig3_All	2.05	1.74	2.96	3.61	4.32	3.3
CL10048.Contig1_All	0	0	0	3.6	1.18	1.26
CL10048.Contig3_All	1.03	0.91	1.03	0.15	0.61	0.3
CL10048.Contig6_All	0.98	0.99	0.83	0.25	0.08	0.17
CL10049.Contig2_All	0.21	0.48	0.42	2.4	2.37	2.3
CL10049.Contig3_All	1.44	2.05	1.85	0.76	0.46	0.57
CL10049.Contig4_All	1.23	0.71	0.96	0.95	0.77	0.41
CL10049.Contig5_All	0.84	1.06	0.68	1.7	1.44	1.73
CL10050.Contig2_All	1.9	1.36	1.66	0.23	0.52	0.55
CL10050.Contig3_All	0	0	0	0.49	0.21	0.29
CL10050.Contig4_All	3.41	4.01	4.02	7.24	7.53	7.7
CL10050.Contig5_All	8.57	8.51	8.79	1.9	1.89	2.04
CL10051.Contig1_All	0.07	0.06	0.05	1.98	1.86	3.02
CL10051.Contig2_All	0.27	0.42	0.1	1.51	1.07	0.91
CL10051.Contig4_All	1.04	0.58	0.84	4.1	4.79	3.75
CL10051.Contig5_All	5.91	6.01	5.87	0.74	0.77	1.11
CL10052.Contig1_All	13.46	11.5	11.81	25.77	27.72	25.08
CL10052.Contig4_All	17.84	14.84	19.3	14.52	16.2	17.05
CL10052.Contig5_All	3.49	4.12	4.12	3.4	1.95	0.54
CL10053.Contig1_All	1.38	1.61	1.59	0	0	0
CL10053.Contig2_All	2.9	3.13	3.12	6.64	5.63	6.14
CL10056.Contig1_All	0.62	0.99	1.01	0	0	0
CL10056.Contig5_All	0.12	0.14	0.13	2.2	1.55	1.65
CL10056.Contig6_All	3.3	2.61	3.34	0	0	0.04
CL10057.Contig1_All	1.95	2.34	1.37	0.76	0.25	0.75
CL10058.Contig1_All	2.6	1.95	1.96	0.16	0.13	0
CL10058.Contig2_All	0.14	0.15	0.15	1.71	1.68	1.87
CL10058.Contig4_All	0.3	0.48	0.48	2.29	2.56	1.82
CL10058.Contig5_All	4.89	3.4	4.84	1.49	0.66	1.13
CL10059.Contig2_All	1.28	3.76	2.77	0	0	0
CL1006.Contig1_All	2.83	3.14	2.82	2.9	2.36	1.82
CL1006.Contig3_All	6.78	6.55	7.1	11.22	10.61	10.09
CL10061.Contig1_All	0.77	0.9	1.33	4.83	4.36	3.61
CL10061.Contig2_All	8.29	7.83	7.89	7.43	7.83	6.74
CL10062.Contig1_All	1.93	2.48	3.43	1.66	1.79	1.41
CL10062.Contig2_All	9.12	8.82	8.95	14.51	14.47	14.53
CL10063.Contig1_All	0.94	0.69	0.89	29.53	23.66	24.87
CL10063.Contig3_All	13.48	17.04	14.77	1.46	1.18	1.83
CL10063.Contig4_All	16.17	17.2	16.76	0	0	0.75
CL10064.Contig1_All	1.25	2.09	2.32	6.48	8.17	6.26
CL10064.Contig2_All	4.55	4.89	4.03	6.98	7.17	7.85
CL10064.Contig3_All	0.42	0.59	0.31	9.91	10.22	10.57
CL10064.Contig4_All	13.13	13.22	11.98	2.39	2.86	2.53
CL10064.Contig5_All	9.35	8.88	8.01	7.03	6.28	7.05
CL10065.Contig2_All	2.11	2.65	2.28	8.54	7.98	8.35
CL10065.Contig3_All	2.14	1.95	2.62	0.25	0.24	0.44
CL10066.Contig1_All	13.76	14.58	12.36	1.75	1.72	1.61
CL10066.Contig2_All	4.81	5.34	4.03	11.09	14.14	12.72
CL10067.Contig1_All	0.42	0.16	0.28	1.13	0.88	1.24
CL10067.Contig2_All	0.44	0.59	0.84	2.05	2.08	1.46
CL1007.Contig2_All	0.62	0.74	0.53	3.36	1.5	2.22
CL1007.Contig3_All	0.79	1.13	1.2	3.55	3.82	3.87
CL1007.Contig4_All	4.37	2.84	3.12	2.15	1.62	1.58
CL1007.Contig5_All	0.85	1.53	1.64	0	0	0
CL10072.Contig1_All	4.62	5.73	4.56	10.09	9.5	8.32
CL10072.Contig2_All	3.86	4.16	4.38	1.35	1.04	0.93
CL10072.Contig3_All	2.63	2.08	2.52	0.32	0.25	0.15
CL10072.Contig5_All	6.79	6.52	5.93	6.08	5.71	6.07
CL10072.Contig6_All	2.62	3.34	3.2	0.79	1.26	0.73
CL10073.Contig1_All	0	0.25	0	3.67	5.09	5.22
CL10073.Contig2_All	0.23	0	0.19	1.14	0.48	0.8
CL10075.Contig1_All	3.81	3.9	3.29	3.68	2.69	2.65
CL10075.Contig2_All	7.41	6.18	7.2	6.63	5.58	5.11
CL10077.Contig1_All	1.83	2.2	2.31	0.48	0.56	0.35
CL10077.Contig2_All	2.05	1.39	1.66	5.59	5.2	4.92
CL10078.Contig4_All	3.05	2.93	3.22	7.1	7.28	6.66
CL10078.Contig5_All	0.71	0.56	0.46	8	7.97	7.81
CL10078.Contig7_All	4.75	5.86	5.99	3.89	3.19	3.43
CL10078.Contig8_All	3.67	3.88	3.53	3.68	3.63	2.74
CL10079.Contig4_All	2.73	3.05	2.78	5.2	4.59	5.85
CL1008.Contig1_All	0	0	0	4.51	1.79	0.88
CL1008.Contig2_All	0	0	0	0.8	2.92	3.33
CL10082.Contig3_All	7.98	5.56	7.61	0	0	0.13
CL10082.Contig5_All	1.69	3.33	2.8	10.75	10.33	11.01
CL10083.Contig1_All	4.18	3.56	5.59	0	0	0
CL10083.Contig2_All	1.25	1.68	1.22	6.25	5.69	5.39
CL10083.Contig6_All	1.63	1.67	2.42	6.82	5.78	6.03
CL10084.Contig1_All	0.72	0.93	1.16	0.05	0.05	0.1
CL10086.Contig1_All	0.12	0	0.13	1.43	1.12	1.66
CL10086.Contig2_All	0.13	0	0	0.71	0.61	1.11
CL10087.Contig1_All	0.26	0	0.09	2.95	1.56	4.91
CL10087.Contig2_All	1.57	1.62	1.49	4.08	4.01	3.81
CL10087.Contig3_All	3.09	2.35	2.35	0.69	0.53	0.48
CL1009.Contig1_All	1.08	1.4	0.83	0	0	0
CL1009.Contig2_All	2	1.52	1.38	0	0	0
CL1009.Contig4_All	0.14	0.07	0	3.06	2.35	3.06
CL1009.Contig5_All	0.72	0.81	0.93	1.48	2.27	1.67
CL10090.Contig1_All	0.19	0.58	0.67	0	0	0
CL10090.Contig2_All	4.4	5.28	5.6	4.16	3.92	4.73
CL10090.Contig3_All	2.38	2.39	3.52	11.4	11.34	9.02
CL10090.Contig4_All	12.98	11.94	14.03	30.6	29.19	32.03
CL10090.Contig6_All	6.92	5.38	5.93	14.64	16.74	14.09
CL10090.Contig7_All	6.45	6.43	6.25	2.91	2.41	3.21
CL10092.Contig1_All	1.67	1.26	0.65	0.09	0.09	0
CL10092.Contig2_All	0.2	0.91	0.85	0	0.18	0
CL10092.Contig3_All	0	0.08	0.06	5.23	5	4.75
CL10092.Contig5_All	1.59	1.4	1.66	3.5	2.28	3.14
CL10092.Contig6_All	1.71	2.34	1.38	0.77	1.16	0.65
CL10092.Contig8_All	0	0	0.11	1.32	0.89	0.81
CL10093.Contig1_All	0.1	0.3	0.2	2.03	2.23	2.1
CL10093.Contig2_All	0.64	0.79	0.64	2.99	5.23	3.44
CL10095.Contig1_All	1.49	3.68	2.94	0	0	0
CL10095.Contig3_All	43.06	42.32	46.89	60.1	63.5	58.99
CL10096.Contig3_All	0.2	0.38	0.22	3.74	2.18	3.54
CL10096.Contig4_All	1.73	1.28	0.79	4	2.67	2.87
CL10097.Contig1_All	0	0	0.18	5.59	6.49	5.78
CL10097.Contig2_All	2.9	5.31	4.01	0	0	0
CL10097.Contig3_All	6.07	7.18	7.09	7.16	7.17	6.13
CL10097.Contig4_All	2.78	3.26	2.93	0	0	0
CL10097.Contig5_All	15.31	13.44	13.94	21.32	20.14	19.9
CL10098.Contig1_All	0	0.32	0.33	6.95	3.99	3.59
CL10098.Contig2_All	5.99	6.06	5.04	2.13	0.64	1.05
CL10098.Contig4_All	1.45	0.94	1.74	0	0	0
CL10099.Contig2_All	3.84	3.99	3.83	1.27	1.29	1.83
CL10099.Contig3_All	1.46	1.47	1.34	5.47	6.24	6.69
CL101.Contig1_All	2.11	1.76	1.94	1.62	1.8	1.39
CL101.Contig2_All	0.78	0.47	0.21	0	0	0.12
CL1010.Contig9_All	1.74	2.23	1.87	3.71	3.75	3.15
CL10101.Contig2_All	1.92	2.73	2.37	1.3	0.74	1.09
CL10102.Contig1_All	0.42	0.44	0	1.78	1.12	2.63
CL10102.Contig2_All	1.02	1.34	0.89	2.25	3.78	2.33
CL10103.Contig2_All	3.81	4.61	5.14	3.21	2.51	2.77
CL10103.Contig3_All	4.17	3.29	3.65	0	0	0
CL10103.Contig4_All	1.74	2.31	1.52	0	0	0
CL10104.Contig1_All	1.22	1.82	1.4	0	0	0
CL10104.Contig2_All	0.7	0.52	0.7	2	1.8	2.11
CL10104.Contig3_All	2.36	2.4	2.52	3.64	3.77	4.18
CL10106.Contig1_All	0.2	0.26	0.22	2.33	2.3	1.83
CL10106.Contig4_All	0.71	0.45	0.73	3.27	2.7	2.51
CL10106.Contig6_All	0.49	0.11	0.17	1.99	1.44	1.52
CL10107.Contig3_All	0	0.55	0.12	1.64	1.33	1.08
CL10107.Contig4_All	1.24	0.78	0.94	1.66	2.58	2.24
CL10107.Contig6_All	2.05	2.98	3.48	1.5	2.05	1.44
CL10108.Contig11_All	0	0	0	1.22	1.25	2.34
CL10108.Contig3_All	0.76	0.73	0.55	1.79	1.82	1.72
CL10108.Contig6_All	12.11	9.6	11.26	17.32	17.44	19.82
CL10108.Contig9_All	1.55	0.4	0.98	0	0	0
CL10109.Contig1_All	5.67	7.21	5.88	0.03	0.09	0.04
CL10109.Contig3_All	2.45	2.27	2.97	5.33	5.93	6.77
CL1011.Contig10_All	2.55	2.02	2.61	10.45	8.53	10.74
CL1011.Contig11_All	23.08	24.13	22.24	16.51	19.18	20.15
CL1011.Contig2_All	3.36	1.71	2.3	0	0	0
CL1011.Contig4_All	8.02	4.81	7.67	2.05	2.07	1.08
CL1011.Contig5_All	11.64	13.64	12.44	21.07	18.8	22.67
CL1011.Contig6_All	59	59.38	54.4	6.9	5.42	6.37
CL1011.Contig7_All	1.95	2.57	2.21	5.66	5.73	4.67
CL1011.Contig8_All	3.19	2.03	2.46	5.4	5.31	5.62
CL1011.Contig9_All	29.64	28.89	29.83	105.6	104.21	114.63
CL10110.Contig1_All	3.63	5.54	4.3	0.34	0.44	0.52
CL10110.Contig2_All	1.89	1.07	1.85	8.61	6.24	7.04
CL10111.Contig13_All	0.29	0.52	0.25	1.13	1.03	0.92
CL10111.Contig2_All	0.33	0.23	0.52	0	0.19	0.14
CL10112.Contig1_All	0	0	0	4.91	2.79	2.08
CL10113.Contig10_All	1.89	1.9	1.55	1.06	0.53	0.94
CL10113.Contig1_All	0.5	0.83	0.63	0.11	0.1	0.31
CL10113.Contig2_All	0	0.21	0	1.82	0.9	1.35
CL10113.Contig3_All	0.32	0	0	0.84	1.15	1.58
CL10113.Contig6_All	0.96	0.66	0.95	3.01	3.33	3.41
CL10113.Contig7_All	2.26	1.39	2.17	0.41	0.75	0.27
CL10113.Contig8_All	1.36	0.86	1.89	3.01	3.06	2.68
CL10114.Contig1_All	2.92	1.68	0.82	4.6	4.82	5.42
CL10114.Contig3_All	0.6	0.7	2.46	0	0	0
CL10115.Contig2_All	2.81	3.01	3.06	4.61	5.53	5.39
CL10116.Contig2_All	34.52	34.78	32.8	61.87	59.74	61.71
CL10116.Contig3_All	21.69	20.73	17.16	38.07	37.78	38.92
CL10117.Contig4_All	1.05	0.74	0.79	4.55	5.05	4.34
CL10118.Contig3_All	0.25	0.09	0.18	4.36	3.87	3.86
CL10118.Contig4_All	6.28	6.96	6.84	5.24	6.44	5.88
CL10119.Contig1_All	0.83	1.56	1.41	0	0.63	0.56
CL10119.Contig2_All	0	0	0	1.41	2.85	1.52
CL10119.Contig3_All	4.3	3.41	4.66	2.17	0.57	1.53
CL1012.Contig2_All	1.39	0.76	0.89	0.06	0.11	0.11
CL1012.Contig3_All	1.59	1.11	1.63	17.56	17.2	16.4
CL1012.Contig4_All	4.05	3.79	5.66	12.86	11.07	12.33
CL10120.Contig2_All	3.36	2.96	2.68	2.04	1.08	2.27
CL10121.Contig1_All	0.33	1.54	1.55	0.35	0.17	0.34
CL10122.Contig1_All	1.6	2.51	2.1	11.07	13.23	12.16
CL10123.Contig3_All	5.04	5.29	6.14	2.94	2.82	2.82
CL10123.Contig4_All	8.26	7.11	7.09	7.64	7.15	7.51
CL10123.Contig5_All	0.8	0.81	0.8	0.04	0.14	0.07
CL10123.Contig6_All	15.22	15.82	15.46	21.72	20.92	22.14
CL10123.Contig7_All	3.06	4.04	5.05	11.79	9.7	11.08
CL10124.Contig1_All	6.96	7.47	6.44	7.93	6.68	6.19
CL10126.Contig3_All	2.67	2.27	2.61	2.25	2.14	1.57
CL10127.Contig1_All	0.83	0.94	0.92	0.09	0.08	0.25
CL10127.Contig2_All	0	0	0	0.73	1.85	1.63
CL10127.Contig3_All	1.07	0.68	0.59	1.69	3	2.64
CL10127.Contig4_All	1.35	1.88	1.38	6.07	3.99	3.71
CL10128.Contig3_All	0.09	0.06	0.06	0	0	0
CL10129.Contig1_All	1.68	1.52	2.5	9.36	5.95	6.14
CL10129.Contig2_All	0.17	0.33	0.49	4.49	5.75	6.59
CL1013.Contig1_All	0	0	0.43	4.2	3.88	2.53
CL1013.Contig2_All	1.61	1.69	1.91	0	0.19	0.47
CL1013.Contig3_All	3.57	3.21	4.08	1.94	1.74	1.89
CL1013.Contig4_All	5.94	8.15	8.09	24.61	22.26	21.68
CL1013.Contig5_All	38.6	37.37	36.07	20.2	20.02	23.27
CL1013.Contig6_All	1.91	1.39	2.35	17.34	18.65	17.79
CL1013.Contig7_All	20.79	20.65	20.47	18.13	16.34	18.19
CL10130.Contig1_All	7.48	7.82	6.16	19.16	18.88	19.68
CL10130.Contig2_All	15.31	15.26	17.47	11	10.65	9.98
CL10130.Contig4_All	6.93	7.88	7.41	7.76	8.13	6.73
CL10130.Contig5_All	0.83	1.13	0.85	2.73	2.92	1.95
CL10130.Contig6_All	7.39	6.7	7.57	5.22	4.71	5.44
CL10130.Contig7_All	0.26	0.15	0.33	1.21	1	0.72
CL10131.Contig1_All	7	6.41	8.44	0.17	0.25	0.06
CL10131.Contig2_All	1.82	2.31	1.95	30.48	25.34	29.58
CL10131.Contig4_All	11.56	12.06	12.05	18.58	19.64	19.56
CL10131.Contig5_All	30.65	31.45	33.58	25.8	26.59	25.32
CL10132.Contig1_All	16.26	14.64	16.49	23.77	24.2	23.72
CL10132.Contig2_All	7.63	6.16	6.21	19.18	19.35	24.6
CL10132.Contig3_All	1.8	2.11	1.81	16.74	18.12	14.7
CL10132.Contig5_All	20.88	21.4	20.39	21.37	19.3	20.68
CL10133.Contig1_All	0.32	0.89	1.35	0.23	0.28	0
CL10134.Contig1_All	0.8	2.86	0	11.99	14.41	16.65
CL10134.Contig3_All	11.52	12.4	12.6	0.08	0	0
CL10134.Contig4_All	4.74	3.35	4.45	2.01	2.98	3.34
CL10134.Contig5_All	22.46	24.39	21.65	38.1	41.48	39.38
CL10136.Contig1_All	0.61	0.82	0.61	3.47	2.91	3.14
CL10137.Contig1_All	1.07	0.78	0.72	0.42	0.57	0.49
CL10137.Contig3_All	3.64	3.08	2.73	6.26	5.27	6.37
CL10137.Contig4_All	18.58	18	19.67	1.04	1.23	0.79
CL10137.Contig5_All	2.5	2.77	2.61	5.08	4.45	4.25
CL10137.Contig6_All	2.26	2.54	2.42	1.9	0.74	1.2
CL10139.Contig1_All	8.35	8.28	9.24	5.63	5.75	7.64
CL10139.Contig2_All	13.9	13.95	13.03	10.46	8.75	10.71
CL1014.Contig1_All	0.12	0.17	0.2	0.68	1.06	0.89
CL1014.Contig2_All	8.53	9.23	8.62	1.73	1.79	2.33
CL1014.Contig3_All	0.82	1.13	0.93	4.41	4.81	4.55
CL1014.Contig4_All	1.3	1.26	1.16	0.26	0.22	0.14
CL1014.Contig5_All	0.36	0.3	0.48	1.37	1.35	1.29
CL1014.Contig7_All	1.82	2.04	1.65	3.39	3.61	3.69
CL10141.Contig2_All	0.32	0.44	0.32	1.82	1.17	3.24
CL10141.Contig3_All	2.91	3.52	3	1.11	1.33	2.19
CL10142.Contig1_All	0.62	0.94	1.14	0	0	0
CL10142.Contig2_All	0.42	0.53	0.36	9.61	11.11	10.26
CL10142.Contig3_All	6.74	7.56	6.21	0	0	0
CL10143.Contig1_All	1.28	0.81	0.82	0	0	0
CL10144.Contig4_All	7.71	7.31	6.63	10.88	12.22	12.88
CL10145.Contig1_All	0.84	0.35	0.41	2.62	2.13	1.87
CL10145.Contig2_All	1.67	1.21	2.2	0.45	0.63	0.77
CL10146.Contig1_All	1.99	2.06	1.4	0.86	0.92	0.39
CL10146.Contig2_All	2.04	1.22	1.71	0.14	0.05	0.05
CL10146.Contig4_All	3.02	2.25	2.85	1.29	1.05	1.3
CL10147.Contig2_All	2.78	2.74	3.14	10.73	10.1	12.53
CL10148.Contig2_All	3.62	4.26	4.23	7.82	7.86	6.48
CL10149.Contig1_All	1.93	3.82	2.29	0.62	0.89	1.33
CL10149.Contig2_All	6.81	7.16	6.65	0	0	0
CL10149.Contig3_All	5.5	5.19	5.76	0.26	0.51	0.33
CL10149.Contig4_All	2.73	2.97	1.49	11.38	11.74	10.83
CL10149.Contig5_All	6.96	8.09	6.84	32.2	34.28	32.39
CL10149.Contig6_All	28.33	26.97	25.4	8.08	7.96	8.24
CL1015.Contig10_All	0.26	0	0	1.61	2.07	2.51
CL1015.Contig11_All	0.7	0	2.27	0	0	0
CL1015.Contig12_All	0	0	0	1.7	0.5	0.76
CL1015.Contig4_All	0.27	0.86	0.29	5.85	7.34	7.2
CL1015.Contig6_All	0	0	0	1.83	2.29	1.13
CL1015.Contig8_All	0	0	0	1.03	2.52	2.66
CL1015.Contig9_All	0	0	0	3.39	2.7	3.7
CL10150.Contig1_All	1.11	1.4	1.42	5.81	5.74	5.44
CL10150.Contig3_All	3.94	5.4	4.85	9.54	10.32	7.47
CL10150.Contig4_All	0.48	1.42	1.71	0	0	0
CL10150.Contig6_All	8.94	9.22	10.65	5.41	5.35	5.51
CL10151.Contig2_All	2.37	2.13	1.62	0.28	0.16	0.36
CL10151.Contig3_All	0.08	0	0.32	3.83	4.73	6.09
CL10151.Contig4_All	1.42	3.1	1.61	0.42	0.2	0.12
CL10151.Contig5_All	0.07	0	0	3.95	3.35	1
CL10151.Contig6_All	2.3	2.31	3.29	0.22	0.23	0
CL10151.Contig8_All	2.68	1.57	2.8	0.42	0.44	0.44
CL10152.Contig1_All	1.75	2.51	2.47	13.47	14.33	12.81
CL10152.Contig2_All	9.23	9.67	9.56	1.27	1.09	1.22
CL10152.Contig3_All	1.82	1.86	0.64	0	0	0
CL10152.Contig4_All	19.99	24.43	21.5	22.61	18.89	20.62
CL10153.Contig1_All	8.95	7.69	6.38	2.57	2.59	2.46
CL10153.Contig2_All	4.13	3.55	4.43	11.76	9.61	10.29
CL10153.Contig3_All	2.54	1.66	2.09	1.03	1.04	0.74
CL10154.Contig1_All	0.45	0.81	0.46	2.22	2.79	2.14
CL10154.Contig2_All	0.41	0.59	0.29	1.83	2.01	0.93
CL10155.Contig2_All	0.5	0.78	0.44	4.81	4.41	4.8
CL10156.Contig2_All	1.27	1.37	1.7	0.51	0.28	0.24
CL10156.Contig3_All	0.52	0.63	0.51	10.93	10.48	7.76
CL10156.Contig4_All	1.12	0.85	0.81	26.73	26.17	25.69
CL10156.Contig5_All	8.86	8.29	7.78	2.83	2.45	2.69
CL10157.Contig2_All	1.74	1.77	1.96	4.54	4.06	3.74
CL10157.Contig3_All	3.2	4.01	4.46	3.2	2.82	3.44
CL10158.Contig2_All	43.11	44.97	45.2	14.84	22.26	24.83
CL10159.Contig1_All	0	0	0	3.87	4.4	4.12
CL10159.Contig2_All	0	0	0.07	3.69	2.89	2.99
CL1016.Contig3_All	4.97	4.62	4.88	3.11	2.4	3.67
CL10160.Contig1_All	3.37	3.12	4.2	0	0	0
CL10160.Contig2_All	0.48	0.73	0.54	4.82	5.07	4.92
CL10160.Contig3_All	2.26	2.59	1.59	5.14	5.92	5.21
CL10161.Contig2_All	0.44	0.26	0.38	4.24	3.53	2.84
CL10161.Contig3_All	1.2	0.91	1.6	0.24	0.48	0.89
CL10161.Contig4_All	1.01	1.43	1.02	0	0	0.1
CL10162.Contig1_All	0.53	0.71	0.26	1.37	1.99	1.32
CL10163.Contig1_All	0.94	1.22	1.06	0.21	0.21	0.34
CL10163.Contig2_All	4.52	5.01	6.92	3.42	3.19	4.34
CL10164.Contig2_All	1.53	2.09	1.82	3.97	4.97	4.96
CL10164.Contig4_All	4.36	3.32	6.09	1.67	0.98	1.23
CL10164.Contig5_All	2.58	2.45	3.01	2.29	2.09	2.06
CL10165.Contig1_All	8.08	8.86	8.31	0.1	0.13	0.14
CL10165.Contig2_All	1.12	1.21	1.47	15.82	13.96	13.07
CL10169.Contig1_All	2.29	4.26	5.17	0	0.28	0.16
CL10169.Contig2_All	4.86	6.15	4.62	4.51	4.21	4.99
CL10169.Contig3_All	7.69	6.42	5.17	0.44	0.34	0.09
CL1017.Contig3_All	0.61	0.48	0.44	1.25	2.16	1.62
CL1017.Contig4_All	6.72	5.45	5.83	4.03	4.9	4.7
CL10170.Contig1_All	6.39	7.49	7.41	10.39	10.18	11.68
CL10170.Contig2_All	1.17	0.61	0.88	15.95	18.37	17.87
CL10171.Contig3_All	9.33	12	13.84	8.49	6.8	6.8
CL10171.Contig4_All	4.24	4.41	4.53	2.81	3.27	3.3
CL10171.Contig5_All	12.27	13.47	14.12	11.58	11.22	10.76
CL10172.Contig2_All	0.14	0.21	0.05	2.77	1.87	1.44
CL10172.Contig3_All	0.49	0.78	1.29	0	0	0
CL10172.Contig4_All	3.93	4.21	4.16	1.56	1.51	2.52
CL10172.Contig5_All	0.11	0.25	0.25	4.79	5.85	5.14
CL10173.Contig1_All	23.8	20.79	23.64	0.62	0.9	0
CL10173.Contig2_All	29.71	26.67	20.23	41.18	40.64	42.39
CL10174.Contig1_All	27.78	31.2	26.29	0.52	0.08	0.62
CL10174.Contig2_All	3.67	4.15	2.99	0.33	0.3	0.24
CL10174.Contig4_All	5.07	5.27	6.85	12.68	10.27	9.97
CL10174.Contig5_All	5.78	7.36	8.58	0.26	0.61	1.04
CL10174.Contig6_All	36.12	40.17	34.91	9.33	8	8.2
CL10174.Contig7_All	24.77	20.59	22.43	0.29	0.18	0.09
CL10178.Contig1_All	1.14	0.94	1.38	0.27	0.35	0.68
CL10178.Contig2_All	4.73	4.92	5.27	1.5	1.61	1.44
CL10179.Contig1_All	0.22	0.15	0.3	2.14	1.25	1.75
CL10179.Contig2_All	15.94	14.29	15.38	14.26	14.14	14.97
CL1018.Contig10_All	1.79	1.56	1.31	0.04	0.04	0.04
CL1018.Contig11_All	3.49	3.55	3.7	7	8.31	7.58
CL1018.Contig1_All	7.55	7.74	7.81	1.11	1.09	0.75
CL1018.Contig2_All	2.63	2.24	1.85	0.09	0.04	0.04
CL1018.Contig4_All	0.18	0.21	0	6.02	6.63	6
CL1018.Contig5_All	2.44	2.64	3.31	0	0	0
CL1018.Contig7_All	2.38	2.52	2.69	0.74	0.76	0.8
CL1018.Contig8_All	1.55	1.54	1.05	0	0	0
CL10180.Contig2_All	2.59	2.62	2.31	2.38	2.34	1.68
CL10181.Contig1_All	5.3	5.68	5.11	0.15	0.16	0.15
CL10181.Contig2_All	2.91	3.73	3.96	15.31	15.56	14.72
CL10182.Contig3_All	1.85	2.09	2.24	5.37	5.32	5.13
CL10182.Contig5_All	0.48	0.24	0.4	2.75	4.04	3.2
CL10184.Contig2_All	0	0	0.88	6.06	6.01	7.85
CL10186.Contig2_All	1.08	1.42	0.91	0.13	0.24	0
CL10186.Contig3_All	5.49	5.58	4.6	8.92	8.64	8.49
CL10187.Contig1_All	1.91	1.41	1.32	6.19	7.34	7.85
CL10187.Contig2_All	4.24	4.62	3.88	2.62	3.36	2.89
CL1019.Contig1_All	13.08	17.01	14.36	10.54	10.69	9.66
CL1019.Contig2_All	1.56	0.77	1.18	0.79	0.41	0.3
CL1019.Contig3_All	1.83	1.34	1.73	4.71	5.04	4.89
CL1019.Contig4_All	0	0	0	1	0.7	0.42
CL1019.Contig6_All	0	0	0	6.42	5.21	5.67
CL1019.Contig8_All	3.03	1.58	2.76	0.92	0.37	1.38
CL10190.Contig1_All	3	2.96	4.08	12.37	13.04	14.29
CL10190.Contig2_All	7.8	7.43	8.01	4.45	3.15	3.85
CL10191.Contig2_All	0.75	1.21	0.76	2.07	2.18	1.84
CL10192.Contig2_All	5.52	4.74	4.61	2.74	2.17	2.93
CL10192.Contig4_All	1.73	2.04	2.21	4.52	4.37	4.55
CL10193.Contig1_All	4.97	6.04	4.52	28.95	30.22	31.2
CL10193.Contig2_All	23.31	18.99	21.27	0	0	0
CL10193.Contig3_All	20.96	24.04	24.48	23.31	22.74	24.38
CL10194.Contig2_All	0	0	0.14	6.28	4.82	4.58
CL10195.Contig2_All	0	0	0	2.56	1.5	2.37
CL10196.Contig2_All	5.41	4.85	6.07	1.56	1.37	1.23
CL10196.Contig3_All	2.18	1.51	2.03	0.93	1.05	0.7
CL10196.Contig5_All	2.16	2.61	3.05	0.67	0.91	0.86
CL10196.Contig6_All	16.33	15.47	16.7	24.06	22.32	23.03
CL10199.Contig2_All	3.1	2.81	4.08	1.85	1.07	1.59
CL102.Contig10_All	0.32	0.92	0.72	0	0	0
CL102.Contig11_All	8.03	7.56	7.72	0	0	0
CL102.Contig12_All	15.68	14.34	19.4	0.1	0.38	0.19
CL102.Contig13_All	1.35	1.03	0.86	4.04	4.74	4.9
CL102.Contig16_All	9.05	9.03	10.28	0	0	0
CL102.Contig1_All	5.2	4.56	4.59	262.56	271.54	283.65
CL102.Contig2_All	1.05	1.35	0.79	6.68	7	8.43
CL102.Contig3_All	3.59	4.98	5.65	350.62	334	339.89
CL102.Contig4_All	9.83	10.89	10.75	0.67	0.48	0.56
CL102.Contig5_All	0.33	0.1	0.17	7.21	7.4	7.39
CL102.Contig7_All	3.54	2.22	2.93	0	0	0
CL102.Contig8_All	6.38	6.88	6.66	57.68	53.65	64.29
CL102.Contig9_All	2.54	2.69	2.06	178.05	195.71	206.77
CL1020.Contig11_All	0.58	0.19	0.52	8.38	8.41	7.6
CL1020.Contig12_All	0	0	0.03	3.41	3.45	3.78
CL1020.Contig13_All	2.68	1.86	7	0.42	0	0
CL1020.Contig15_All	2.76	4.12	3.61	2.47	2.96	3.77
CL1020.Contig1_All	8.31	8.23	8.3	0.76	0.45	0.68
CL1020.Contig2_All	1.26	0.98	1.88	0	0	0
CL1020.Contig7_All	1.24	1.02	1.27	3.15	2.95	2.59
CL1020.Contig9_All	0.29	1.02	0	0	0	0
CL10200.Contig2_All	22.32	21.02	20.92	23.09	22.84	21.17
CL10200.Contig3_All	12.01	11.96	11.86	12.49	12.59	11.54
CL10201.Contig1_All	3.66	5.7	4.33	0	0	0
CL10202.Contig1_All	0.39	0.45	0.36	0.12	0.18	0.09
CL10203.Contig1_All	4.65	5.93	6.71	2.84	1.54	1.36
CL10203.Contig2_All	4.51	3.59	3.35	0.24	0.32	0.24
CL10203.Contig3_All	0.53	0.45	0.36	2.66	1.93	1.75
CL10204.Contig1_All	0.32	0.9	0.94	0	0	0
CL10204.Contig2_All	3.61	4.02	4.85	3.04	2.87	1.94
CL10204.Contig3_All	4.99	5.55	4.84	1.87	1.9	2.25
CL10204.Contig4_All	0.72	0.64	0.59	0.26	0.32	0.32
CL10204.Contig5_All	1.73	1.63	1.92	7.31	6.3	6
CL10205.Contig1_All	6.48	7.82	7.64	0.68	0.9	1.08
CL10205.Contig2_All	8.14	11.07	8.32	5.21	4.19	5.07
CL10206.Contig1_All	16.04	17.55	18.04	14.52	13.75	13.68
CL10206.Contig2_All	1.76	1.64	1.26	7.36	7.77	5.66
CL10207.Contig2_All	0	0.43	0	1.55	1.77	2.39
CL10208.Contig1_All	3.19	3.9	3.15	0	0	0
CL10208.Contig2_All	1.92	2.66	1.85	0.36	0.12	0.84
CL10208.Contig3_All	0.21	0.53	1.75	5.32	7.94	9.37
CL10209.Contig1_All	4.71	3.59	4.06	0	0	0
CL10209.Contig3_All	2.76	2.63	3.46	18.78	19.3	19.6
CL1021.Contig1_All	2.39	1.82	1.38	0.53	0.18	0.64
CL1021.Contig2_All	2.61	1.59	1.9	0	0.09	0.11
CL1021.Contig3_All	8.6	9.04	10.46	13.27	16.86	14.13
CL1021.Contig4_All	32.66	33.36	34.04	22.49	23.14	24.09
CL10210.Contig1_All	16.12	15.85	16.36	66.05	64.87	76.12
CL10210.Contig2_All	60.15	56.9	64.71	19.89	20.37	21.58
CL10210.Contig3_All	91.31	93.15	93.18	138.28	126.81	158.91
CL10211.Contig1_All	2.19	2.06	2.05	1.52	1.68	1.66
CL10212.Contig1_All	1.13	0.91	1.31	3.49	2.97	4.02
CL10213.Contig1_All	0	0	0	2.43	1.83	2.1
CL10214.Contig2_All	0.86	0.82	1.43	3.79	4.03	3.39
CL10214.Contig3_All	1.07	1.31	1.1	0	0	0
CL10214.Contig4_All	0.73	0.52	0.93	2.55	2.33	2.13
CL10216.Contig10_All	1.53	1.7	1.7	0.06	0.07	0.04
CL10216.Contig11_All	3.39	4.53	4.06	0.63	0.48	0.34
CL10216.Contig12_All	1.6	2.04	1.28	0.13	0.17	0.13
CL10216.Contig14_All	2.6	2.29	2.16	0.51	0.28	0.46
CL10216.Contig15_All	0.81	0.83	0.63	0	0	0
CL10216.Contig16_All	0.43	0.38	0.49	0	0	0
CL10216.Contig17_All	1.43	1.53	1.69	0.07	0	0.12
CL10216.Contig18_All	0.27	0.22	0.29	0.07	0.03	0
CL10216.Contig19_All	6.98	6.96	7.27	0.54	0.83	0.69
CL10216.Contig1_All	1.44	1.77	2.64	0.04	0	0.04
CL10216.Contig20_All	0.72	1.09	0.64	0.47	0.55	0.37
CL10216.Contig21_All	0.95	0.41	0.44	0.12	0	0.07
CL10216.Contig23_All	0.17	0	0.38	0	0	0
CL10216.Contig2_All	0.15	0.1	0.19	2.63	1.82	1.81
CL10216.Contig3_All	0.34	0	0.16	3.35	3.77	2.84
CL10216.Contig4_All	9.27	10.32	9.95	0.45	0.49	0.42
CL10216.Contig5_All	0.44	1.01	0.48	2.04	2.13	1.9
CL10216.Contig6_All	0.68	0.72	0.63	0.04	0.12	0.07
CL10216.Contig7_All	2.68	2.83	2.64	0.07	0.03	0.08
CL10216.Contig8_All	2.97	2.41	3.02	0.23	0.3	0.27
CL10218.Contig1_All	2.13	2.13	1.13	1.49	1.3	0.86
CL10218.Contig2_All	36.19	35.13	38.18	38.18	39.73	38.8
CL10219.Contig1_All	0.91	0.6	1.04	0.15	0.3	0.15
CL1022.Contig1_All	2.05	2.53	1.38	0.8	0.59	1.13
CL1022.Contig2_All	1.81	2.75	1.96	16.01	15.31	20.85
CL1022.Contig3_All	44.28	39.33	44.85	34.43	30.58	35.88
CL1022.Contig6_All	41.25	46.21	48.43	31.38	34.85	36.82
CL10220.Contig10_All	0	0	0	0.83	2.03	1.25
CL10220.Contig11_All	0.82	0.7	1.15	0.35	0	0
CL10220.Contig12_All	0	0	0	0.4	0.39	0.16
CL10220.Contig14_All	0.15	0	0	0.18	2.15	0.76
CL10220.Contig15_All	0.44	0.62	0.86	0.07	0.07	0.14
CL10220.Contig19_All	0.36	0.21	0.7	0.09	0	0
CL10220.Contig1_All	1.46	0.73	2.05	0	0	0
CL10220.Contig21_All	0.52	0.59	0.15	0	0	0
CL10220.Contig2_All	1.81	2.32	2.74	0	0	0
CL10220.Contig9_All	0.94	0.59	0.59	0	0	0
CL10221.Contig1_All	0.44	0.51	0.32	1.22	1.65	1.48
CL10221.Contig2_All	2.97	2.91	2.9	1.94	1.32	1.22
CL10222.Contig1_All	1.15	1.06	1.22	3.67	4.6	4.25
CL10222.Contig2_All	0.28	0	0.27	5.28	5.5	4.98
CL10222.Contig3_All	8.08	7.93	7.96	2.58	3.15	3.21
CL10222.Contig4_All	1.75	2.24	2.7	0.66	0.49	0.5
CL10222.Contig5_All	1.07	0.96	1	2.3	1.98	1.44
CL10223.Contig1_All	2.12	2.44	2.6	2.39	1.87	1.74
CL10223.Contig2_All	8.37	9.1	8.11	1.26	1.53	1.19
CL10223.Contig3_All	1.74	1.97	1.62	4.51	3.62	4.18
CL10223.Contig4_All	1.73	2.24	1.28	1.62	1.33	1.33
CL10223.Contig5_All	0.95	0.55	1.04	2.89	2.78	3.32
CL10223.Contig6_All	1.6	1.52	1.35	1.03	1.11	0.78
CL10223.Contig7_All	1.18	1.06	1.79	6.11	6.53	6.97
CL10225.Contig1_All	0	0	0	13.74	16.46	15.25
CL10225.Contig2_All	16.81	19.38	19.83	15.3	12.63	13.57
CL10226.Contig2_All	0.29	0.39	0.1	1.65	0.94	0.88
CL10227.Contig1_All	2.08	1.6	2.14	3.5	3.95	3.69
CL10227.Contig2_All	0.78	1.33	0.92	0	0	0
CL10228.Contig1_All	5.85	7.28	4.73	0	0	0
CL10228.Contig2_All	2.13	0	2.77	0	0	0
CL10228.Contig3_All	3.08	2.98	2.46	0	0	0
CL10229.Contig2_All	3.86	3.8	4.37	6.38	5.83	5.96
CL10229.Contig3_All	2.47	2.43	2.96	1.79	1.59	1.62
CL10229.Contig4_All	1.61	1.17	1.39	4.01	3.36	3.62
CL10229.Contig6_All	6.06	6.25	6.47	4.41	3.92	4.44
CL1023.Contig2_All	3.38	1.43	2.05	0	0	0
CL10230.Contig2_All	4.48	4.78	5.39	2.69	3.14	2.66
CL10230.Contig3_All	2.44	3.07	2.07	1.54	1.64	1.49
CL10231.Contig1_All	1.53	0.88	0.88	0	0	0
CL10231.Contig2_All	1.47	1.57	2.16	0.19	0	0
CL10231.Contig3_All	0.29	0.49	0.63	1.26	1.9	1.53
CL10231.Contig4_All	0.72	0.3	0.32	2.63	2.57	3.21
CL10233.Contig1_All	9.43	8.47	10.2	36.73	33.93	35.44
CL10233.Contig2_All	0	0	0	0.45	0.49	0.25
CL10233.Contig3_All	3.15	4.19	3.62	14.08	12.98	12.94
CL10234.Contig1_All	7.18	7.48	7.4	11.04	9.93	9.79
CL10236.Contig1_All	0	0	0	1.21	2.18	2.15
CL10236.Contig2_All	1.08	1.41	1.61	0.61	0.41	0.2
CL10238.Contig2_All	3.14	3.65	4.91	0.62	0.31	0.61
CL10239.Contig2_All	5.03	4.39	4.26	8.3	6.89	6.44
CL1024.Contig1_All	0.57	0.97	0.82	3.71	2.7	3.39
CL1024.Contig3_All	2.63	3.74	3.1	0	0.26	0.32
CL1024.Contig4_All	0.5	0.37	0.51	0	0	0
CL1024.Contig5_All	1.6	1.41	1.11	2.4	3.54	3.05
CL1024.Contig7_All	0.85	0.6	0.55	0.22	0.33	0
CL10241.Contig1_All	3.08	3.66	3.26	0.16	0.05	0.19
CL10241.Contig3_All	2.33	2.23	2.21	0.6	0.18	0.17
CL10241.Contig4_All	8.12	9	9.21	16.36	15.01	16.14
CL10242.Contig2_All	0.97	0.37	0.9	1.65	3.48	3.15
CL10247.Contig1_All	0.22	0.8	0.46	5.21	2.96	4.8
CL10247.Contig2_All	33.31	32.27	34.29	47.61	52.67	54.86
CL10247.Contig3_All	95.11	86.65	96.08	163.43	157.53	157.67
CL10247.Contig4_All	76.8	69.62	77.29	125.21	113.79	112.63
CL10248.Contig1_All	2.26	1.9	2.7	1.55	1.54	1.64
CL10248.Contig2_All	0.29	0.5	0.49	4.95	5.09	4.38
CL10248.Contig3_All	3.39	3.74	3.42	2.64	2.18	1.65
CL10249.Contig2_All	4.63	4.53	4.05	1.14	0.75	0.67
CL10249.Contig3_All	2.15	2.42	1.96	0	0	0
CL1025.Contig1_All	9.51	10.89	10.74	0.67	0.94	0.92
CL1025.Contig2_All	10.86	9.74	10.54	1.11	1.35	1.87
CL1025.Contig3_All	2.7	2.62	3.03	0.71	0.5	0.61
CL1025.Contig4_All	1.65	1.53	0.93	0	0.73	0
CL10250.Contig3_All	0.87	0.67	1.02	2.88	1.76	2.28
CL10251.Contig2_All	0.62	0.66	1.16	0.08	0	0
CL10251.Contig3_All	0.67	1.17	0.61	1.98	2.17	2.51
CL10251.Contig4_All	3.72	3.42	4.1	3.23	3.55	3.27
CL10253.Contig1_All	0.33	0.54	0.83	1.53	2.9	2.1
CL10254.Contig1_All	0.79	0.62	0.79	2.77	2.79	2.02
CL10256.Contig2_All	0.15	0.14	0.03	0.51	0.41	0.24
CL10256.Contig4_All	26.63	27.41	28.33	17.57	19.13	20.67
CL10257.Contig3_All	0	0.26	0.26	7.09	7.38	8.53
CL10257.Contig4_All	3.48	1.87	1.89	0.38	0	0.38
CL10258.Contig1_All	0	0.17	0	2.67	2.49	1.22
CL1026.Contig1_All	1.16	1.36	0.84	0.28	1	0.58
CL1026.Contig2_All	0.5	0.44	0.21	3.45	3.85	2.65
CL10260.Contig4_All	2.31	2.26	2.47	1.34	1.09	1.6
CL10261.Contig1_All	0.59	0.6	0.3	3.27	3.81	4.47
CL10261.Contig2_All	0.56	0.27	0.23	5.11	3.84	2.69
CL10262.Contig1_All	1	1.22	1.18	0	0	0
CL10262.Contig2_All	1.65	2.03	1.6	2.9	3.32	3.26
CL10263.Contig2_All	1.73	1.6	3.01	0	0	0
CL10263.Contig3_All	4.64	4.83	4.78	6.98	7.16	6.75
CL10263.Contig4_All	5.08	5.61	5.31	4.58	5.04	3.18
CL10264.Contig3_All	2.66	3.01	2.88	2.65	2.31	2.98
CL10265.Contig1_All	1.36	1.31	0.87	0.09	0.18	0.09
CL10265.Contig2_All	4.66	3.5	4.66	0.07	0.07	0
CL10267.Contig1_All	0.66	2.04	2.06	0	0	0
CL10268.Contig1_All	0.56	0.82	0.55	2.13	2.04	2.12
CL1027.Contig1_All	0.21	0	0.12	18.73	19.75	20.32
CL1027.Contig2_All	3.07	4.39	4.85	3.05	3.96	3.37
CL1027.Contig3_All	0.25	0.24	0.4	3.37	2.83	3.18
CL1027.Contig4_All	3.41	4.65	5.09	2.53	2.75	2.06
CL10270.Contig1_All	0.22	0	0.11	1.25	0.93	0.75
CL10270.Contig2_All	0	0.18	0	2.56	2.22	2.33
CL10271.Contig1_All	31.41	32.57	33.89	4.36	4.04	5.15
CL10271.Contig2_All	15.93	16.07	15.91	0.34	0.26	0.37
CL10271.Contig3_All	1.07	0.81	1.21	20.93	20.35	19.61
CL10271.Contig4_All	0.05	0	0.2	25.71	24.73	27.63
CL10271.Contig5_All	39.61	41.14	38.96	14.25	13.81	11.82
CL10272.Contig1_All	1.54	1.62	1.45	0.6	0.67	0.54
CL10272.Contig2_All	3.91	4.71	3.23	1.39	2.37	2.61
CL10273.Contig2_All	8.01	6.81	7.36	39.9	33.67	35.36
CL10273.Contig3_All	6.85	9.23	8.93	16.1	15.9	17.16
CL10273.Contig4_All	15.56	8.55	10.42	5.1	5.45	4.12
CL10273.Contig5_All	22.56	27.8	27.13	15.06	14.82	16.3
CL10274.Contig1_All	3.22	3.19	3.2	1.06	0.78	0.9
CL10275.Contig2_All	12.54	12.32	14.18	1.93	1.11	2.5
CL10275.Contig3_All	0.46	1.51	0.92	4.15	3.18	3.65
CL10275.Contig4_All	6.2	6.21	4.02	0	0	0.03
CL10275.Contig5_All	15.25	18	14.62	27.73	29.69	28.28
CL10277.Contig1_All	3.43	3.79	4.2	8.83	7.96	8.82
CL10277.Contig2_All	10.62	10.42	10.56	9.52	7.85	8.35
CL10277.Contig3_All	6.63	6.44	7.22	9.63	10.38	9.34
CL10277.Contig4_All	13.18	13.03	13.81	10.05	10.3	10.08
CL10277.Contig5_All	8.52	9.68	9.33	2.95	2.99	2.12
CL10277.Contig7_All	26.16	27.46	26.89	26.91	26.43	27.07
CL10278.Contig1_All	2.33	0.42	2.13	0	0.43	0
CL10279.Contig1_All	5.88	7.36	7.01	11.52	12.85	14.69
CL10279.Contig2_All	10.6	12.19	12.9	0.98	1.8	1.11
CL1028.Contig1_All	3.03	3.04	2.63	0.1	0.05	0.06
CL1028.Contig2_All	2.03	1.79	2.1	0.71	0.68	0.7
CL1028.Contig3_All	0.9	1.07	0.6	3.42	3.82	3.1
CL1028.Contig4_All	1.33	1.49	1.94	3.73	3.23	2.69
CL10280.Contig2_All	12.31	13.91	12.74	8.11	7.91	6.36
CL10280.Contig3_All	2.27	1.96	2.12	8.7	9.63	9.64
CL10280.Contig4_All	8.78	8.48	11.07	8.44	7.66	9.16
CL10281.Contig2_All	1.65	1.23	1.36	0.42	0.68	0.37
CL10281.Contig4_All	0.71	0.14	1.44	6.76	6	6.33
CL10281.Contig5_All	0.18	0.68	0.67	1.71	1.69	1.88
CL10281.Contig7_All	2.67	2.29	2.13	1.37	1.06	0.94
CL10285.Contig2_All	1.91	1.97	2.77	0.12	0.23	0
CL10287.Contig1_All	1.81	1.53	2.34	3.93	5.11	4.54
CL10287.Contig2_All	1.67	0.84	1.74	0.21	0.27	0.2
CL10287.Contig3_All	0.79	0.44	0.47	1.64	2.01	2
CL10288.Contig1_All	0.12	0	0.14	2.46	2.39	1.37
CL10288.Contig2_All	0.44	0.33	0.68	2.27	1.55	1.6
CL10288.Contig3_All	4.38	4.56	3.95	0.34	0.44	0.33
CL10289.Contig1_All	2.71	2.22	2.08	0	0	0
CL10289.Contig2_All	0.04	0.02	0.02	0.31	0.28	0.34
CL10289.Contig3_All	5.22	5.84	5.38	0.25	0.09	0.28
CL10289.Contig4_All	3	2.21	2.86	9.59	9.32	9.14
CL1029.Contig2_All	0.08	0	0.08	1.33	0.78	0.85
CL10290.Contig1_All	0.29	0.62	0.31	4.44	3.82	3.44
CL10291.Contig3_All	7.59	7.62	5.84	13.05	13.38	13.54
CL10292.Contig1_All	4.97	4.16	4.28	1.61	1.36	1.33
CL10292.Contig2_All	2.43	4.89	3.44	5.75	5.56	8.95
CL10292.Contig3_All	0.12	0.28	0.21	0.69	1.33	1.1
CL10292.Contig4_All	1.22	0	0.64	11.02	10.6	7.19
CL10292.Contig5_All	3.51	3.87	3.97	0.06	0.07	0.26
CL10292.Contig6_All	9.24	9.22	7.49	5.63	4.05	5.92
CL10293.Contig2_All	1.23	1.65	1.01	3.47	4.11	3.93
CL10294.Contig2_All	1.52	1.39	0.89	0.21	0.2	0.46
CL10295.Contig1_All	0.33	0.12	0	1.39	1.47	0.97
CL10295.Contig2_All	6.87	7.38	8.02	10.94	11.48	11.03
CL10295.Contig4_All	4.45	5.5	5.03	0.33	0.47	0.46
CL10295.Contig5_All	5.91	7.54	6.88	10.25	10.43	10.7
CL10296.Contig1_All	0	0	0	6.73	6.27	6.74
CL10297.Contig1_All	8.2	9.98	9.63	4.28	5.93	5.64
CL10297.Contig2_All	14.47	13.31	14.5	23.87	22.09	23.79
CL10298.Contig1_All	8.26	8.34	8.73	14.98	13.62	13.04
CL10298.Contig2_All	2.91	2.74	2.27	4.98	4.2	4.85
CL10298.Contig3_All	9.98	9.04	9.61	8.69	8.87	9.49
CL10299.Contig1_All	1.27	1.08	2.17	0	0.28	0
CL103.Contig2_All	4.11	4.54	4.02	2.12	1.87	2.09
CL103.Contig7_All	1.14	1.5	1.56	0.09	0	0.19
CL1030.Contig2_All	1.2	1.19	1.45	3.73	3.88	3.68
CL1030.Contig6_All	0.27	0.29	0.34	0	0	0
CL1030.Contig7_All	1.11	1	1.08	2.82	2.86	2.45
CL10300.Contig1_All	0.37	0.5	0.31	4.9	4.6	5.02
CL10300.Contig3_All	1.41	0.82	1.8	2.79	3.7	3.72
CL10300.Contig4_All	4.6	5.14	4.75	1.68	1.96	1.32
CL10301.Contig1_All	12.68	15.25	14.75	12.88	12.53	12.19
CL10302.Contig2_All	2.45	2.37	2.54	0.49	1.27	0.33
CL10302.Contig3_All	3.51	3.29	2.66	0.36	0.18	0.81
CL10303.Contig1_All	5.33	5.34	5.12	13.25	10.5	11.27
CL10304.Contig2_All	4.44	5.59	5.49	8.35	7.97	10.24
CL10305.Contig3_All	0.35	0.53	0.19	1.61	1.4	1.61
CL10305.Contig5_All	0.38	0	0.53	4.3	4.95	3.78
CL10305.Contig6_All	1.16	1.59	1.56	1.2	0.81	0.41
CL10306.Contig1_All	0.15	0.31	1.08	3.59	3.59	2.15
CL10307.Contig2_All	0.64	0.72	0.46	1.73	3.04	2.39
CL10308.Contig2_All	0.58	1.05	0.94	0	0	0
CL10308.Contig3_All	4.42	4.43	4.36	8.62	6.93	9.85
CL10308.Contig4_All	0.93	0.99	1.56	19.81	21.13	22.1
CL10308.Contig5_All	0.8	1.05	1	9.48	9.21	8
CL10309.Contig2_All	0.81	1.01	0.36	8.54	11.35	10.79
CL10309.Contig3_All	7.95	8.66	8.83	1.25	0.78	0.62
CL1031.Contig10_All	116.82	121.44	136.49	121.04	121.91	109.73
CL1031.Contig11_All	41.01	40.73	46.13	88.23	88.55	83.73
CL1031.Contig12_All	31.63	29.79	30.24	102.87	97.56	95.61
CL1031.Contig13_All	280.89	290.17	303.69	417.83	403.53	395.76
CL1031.Contig14_All	0	0	0.02	7.64	9.54	8.53
CL1031.Contig15_All	4.36	5.05	4.59	7.88	6.56	7.1
CL1031.Contig16_All	170.66	171.8	179.21	0	0	0
CL1031.Contig17_All	18.49	15.08	16.73	54.51	52.9	47.01
CL1031.Contig18_All	79.52	78.78	74.27	382.37	370.15	364.82
CL1031.Contig19_All	93.66	81.92	92.28	31.72	25.87	28.5
CL1031.Contig1_All	0.13	0.17	0.14	77.2	68.07	72.84
CL1031.Contig20_All	137.44	151.9	162.25	73.95	74.88	84.42
CL1031.Contig21_All	21.09	20.99	18.97	18.77	16.05	16.45
CL1031.Contig22_All	203.64	223.62	220.99	120.24	119.78	114.27
CL1031.Contig23_All	2.33	2.05	1.96	33.35	32.25	34.03
CL1031.Contig24_All	347.14	344.39	361.49	61.59	58.94	56.32
CL1031.Contig25_All	0	0	0	0.48	0	0.34
CL1031.Contig2_All	0.53	0.62	0.85	2.42	2.05	2.16
CL1031.Contig4_All	3.28	4.51	6.12	1.58	0.91	1.17
CL1031.Contig5_All	301.85	304.62	296.45	326.39	326.93	304.21
CL1031.Contig6_All	44.11	45.91	45.91	21.71	22.7	22.57
CL1031.Contig7_All	118.67	117.43	121.05	183.64	176.81	183.99
CL1031.Contig8_All	12.46	11.31	14.24	0.12	0.04	0.03
CL1031.Contig9_All	6.6	8.15	7.06	5.66	5.15	6.05
CL10310.Contig1_All	0.32	1.02	1.03	0	0	0
CL10310.Contig3_All	0.85	0.6	0.44	3.13	2.23	1.76
CL10311.Contig2_All	0.99	1.76	1.07	0	0	0
CL10313.Contig10_All	0	0.01	0	0.84	1.91	0.44
CL10313.Contig16_All	0	0.07	0	2.77	2.59	1.83
CL10313.Contig1_All	0	0	0.03	0.2	0	0.51
CL10313.Contig4_All	0	0	0	1.74	0.89	1.35
CL10313.Contig5_All	0	0.02	0	1.65	1.9	1.59
CL10313.Contig9_All	0	0	0	1.85	1.51	1.65
CL10314.Contig1_All	1.2	0.77	1.05	0	0	0
CL10314.Contig2_All	0.94	1.33	2.8	5.65	6.34	5.36
CL10314.Contig3_All	10.12	10.42	8.89	0.14	0.24	0.72
CL10314.Contig4_All	14.44	16.57	15.81	0.55	0.13	0.1
CL10315.Contig2_All	0.79	1.37	0.96	2.65	2	2.49
CL10315.Contig3_All	8.66	10.19	8.09	1.73	2.05	2.36
CL10315.Contig5_All	7.25	8.3	9.58	19.35	18.92	19.04
CL10316.Contig1_All	3.49	3.3	3.9	5.89	7.52	6.47
CL10317.Contig1_All	18.53	16.84	16.64	0.07	0.13	0.21
CL10317.Contig2_All	8.65	9.62	9.44	18.86	19.82	20.68
CL10317.Contig3_All	0.09	0.09	0.35	9.55	11.13	9.57
CL10318.Contig1_All	0.11	0.34	0.32	1.69	1.84	0.78
CL10318.Contig2_All	0	0.1	0.39	1.28	1.25	0.42
CL10318.Contig3_All	0.16	0.1	0.06	0.84	0.71	0.91
CL10318.Contig4_All	0	0.12	0	0.84	0.67	0.77
CL10318.Contig5_All	1.95	1.54	1.81	5.13	5.57	4.81
CL10319.Contig1_All	0	0	0	1.74	1.5	3.04
CL1032.Contig1_All	0.84	1.2	0.76	0.14	0.09	0.06
CL1032.Contig2_All	3.07	3.21	3.35	26.5	26.94	26.24
CL1032.Contig3_All	21.21	19.36	20.06	9.73	9.94	10.39
CL10320.Contig2_All	3.45	4.92	3.37	0.35	0.14	0.05
CL10320.Contig3_All	13.53	12.33	16.12	1.67	1.26	1.53
CL10320.Contig4_All	1.68	2.5	1.99	20.02	21.56	20.78
CL10321.Contig1_All	0	0	0	1.19	0.95	0.7
CL10321.Contig3_All	1.24	1.51	1.73	6.09	5.87	5.36
CL10321.Contig4_All	6.75	7.21	6.88	3.55	3.54	3.34
CL10322.Contig2_All	3.73	3.71	3.91	0.55	0.58	0.44
CL10322.Contig3_All	2.82	2.93	3.38	6.01	6.25	5.51
CL10323.Contig3_All	2.37	4.14	2.76	8.09	8.88	11.96
CL10324.Contig1_All	13.44	13.88	13.72	10.8	9.82	11.47
CL10324.Contig2_All	32.26	32.59	33.28	0.08	0	0
CL10324.Contig3_All	1.68	2.23	1.69	20.52	19.19	20.97
CL10325.Contig2_All	0.51	0.25	0.5	4.91	4.39	4.19
CL10325.Contig4_All	1.18	1.9	1.41	0.42	0.4	0.36
CL10326.Contig1_All	12.71	13.78	12.81	8.15	9.99	10.21
CL10326.Contig2_All	1.43	0.96	0.44	5.94	7.59	6.64
CL10328.Contig2_All	2.55	2.92	2.89	5.1	5.52	5.24
CL10329.Contig1_All	0.5	0.38	0.38	1.11	1.88	0.81
CL10329.Contig2_All	0	0	0.05	0.83	0.9	1.4
CL10329.Contig4_All	0.89	1.27	1.27	0.25	0.17	0.16
CL10329.Contig5_All	1.05	0.93	1.4	0	0	0.02
CL10329.Contig6_All	2.13	2.13	2.15	3.41	3.79	5.11
CL1033.Contig1_All	1.6	1.3	0.91	0.39	0.96	0.66
CL1033.Contig2_All	7.92	9.16	7.58	2.12	2.47	3.54
CL1033.Contig3_All	3.04	3.24	1.56	6.48	7.85	4.79
CL1033.Contig4_All	19.53	19.2	19.33	5.02	5.17	5.36
CL1033.Contig5_All	11.83	12.2	12.96	10.19	8.72	9.33
CL1033.Contig6_All	8.03	8	8.35	15.45	15.04	15.53
CL10330.Contig2_All	3.19	1.17	2.35	0.68	0.34	0.5
CL10330.Contig3_All	1.31	0.99	1.88	3.94	3.34	4.82
CL10330.Contig4_All	2.18	2.3	2.38	1.24	0.97	0.98
CL10330.Contig5_All	12.81	12.78	12.55	12.11	12.09	13.14
CL10331.Contig1_All	15.78	17.65	15.72	7.21	6.02	6.22
CL10331.Contig2_All	8.4	8.07	6.48	35.5	37.62	36.36
CL10331.Contig3_All	23.74	25.64	24.34	8.3	11.54	11.15
CL10332.Contig2_All	6.13	8.13	6.34	0	0	0
CL10332.Contig3_All	0.32	0.33	0.16	2.07	2.81	4.07
CL10332.Contig4_All	6.55	3.45	4.15	0	0	0
CL10333.Contig1_All	0.35	0.46	0.27	0	0	0
CL10333.Contig5_All	1.81	1.61	2.02	3.06	3.39	2.96
CL10333.Contig6_All	1.08	0.77	0.99	2.32	1.98	2.51
CL10333.Contig7_All	0.71	1.24	1.16	0.11	0.05	0.27
CL10333.Contig8_All	1.84	2.22	2.06	0.96	0.41	0.85
CL10333.Contig9_All	0.88	1.98	2.17	0.25	0	0.1
CL10335.Contig2_All	1.25	0.91	0.31	8.76	10.2	10.38
CL10335.Contig3_All	3.54	4.21	4.17	15.5	17.68	15.93
CL10335.Contig4_All	9.21	9.56	8.99	2.04	2.07	1.37
CL10336.Contig2_All	1.06	1.39	1.31	3.86	4.99	3.94
CL10337.Contig2_All	0.29	0.15	0.61	1.7	1.7	2.13
CL10337.Contig3_All	0.48	0.24	0.4	2.86	2.68	2.31
CL10337.Contig4_All	0	0	0	2.6	2.69	3.03
CL10337.Contig5_All	0.23	0.31	0.38	1.55	1.5	1.59
CL10337.Contig6_All	1.81	3.83	2.89	0.29	0.06	0.21
CL10337.Contig7_All	2.48	1.34	2.59	6.57	8.5	8.69
CL10338.Contig1_All	6.6	7.56	8.2	0.02	0	0
CL10338.Contig2_All	2.38	2.3	2.9	11.24	11.34	11.98
CL1034.Contig10_All	2.63	2.76	2.28	0.42	0.11	0.39
CL1034.Contig11_All	1.38	1.83	1.73	0.01	0.02	0.18
CL1034.Contig12_All	0	0	0	15.04	13.85	13.38
CL1034.Contig13_All	0	0	0	12.42	11.95	10.25
CL1034.Contig14_All	12.31	13.04	10.79	1.64	1.86	2.48
CL1034.Contig15_All	2.06	2.74	2.35	3.48	4.18	3.6
CL1034.Contig16_All	2.6	2.11	3.41	0	0	0
CL1034.Contig17_All	1.14	0.77	0.81	0	0	0
CL1034.Contig19_All	1.39	0.81	0.68	0	0	0
CL1034.Contig1_All	0.07	0.02	0.15	0	0	0
CL1034.Contig20_All	0.31	0.2	0.25	0.05	0.02	0.03
CL1034.Contig21_All	0.19	0.23	0.29	2.95	2.21	2.55
CL1034.Contig22_All	5.51	5.67	5.89	0.28	0.2	0.23
CL1034.Contig2_All	1.07	1.49	1.63	0.03	0	0
CL1034.Contig4_All	1.41	2.01	2.95	0.12	0	0
CL1034.Contig5_All	1.88	2.85	2.29	0	0	0.03
CL1034.Contig6_All	3.38	3.52	3.87	2.57	2.05	2.04
CL1034.Contig7_All	1.56	2.58	2.02	1.6	2.11	1.44
CL1034.Contig8_All	2.8	2.2	2.07	3.97	3.56	4.14
CL1034.Contig9_All	0.12	0.19	0.18	7.15	6.98	6.6
CL10340.Contig1_All	3.06	2.1	1.75	0.59	0.12	0.35
CL10341.Contig1_All	0.15	0.15	0.45	1.69	1.46	0.91
CL10341.Contig2_All	0.33	0.47	0.67	3.08	2.73	2.83
CL10342.Contig1_All	0	0	0	10.07	7.88	8.51
CL10342.Contig2_All	0	0	0	3.78	5.5	4.31
CL10343.Contig1_All	8.57	8	8.08	5.17	5.47	4.29
CL10343.Contig2_All	4.16	2.07	2.9	0.21	1.27	0.62
CL10344.Contig1_All	0.09	0	0	2.86	2.35	2.13
CL10344.Contig2_All	2.53	2	1.9	0.21	0.3	0.2
CL10344.Contig4_All	0	0.1	0.1	5.06	4.41	4.44
CL10345.Contig1_All	6.04	6.4	6.4	2.81	3.4	3.49
CL10345.Contig2_All	2.74	3.67	7.07	0	0	0
CL10346.Contig1_All	0.68	0.68	0.5	8.23	8.32	9.55
CL10346.Contig2_All	2.44	2.01	2.57	0.52	0.37	0.45
CL10346.Contig4_All	2.74	0.33	1.97	0	0	0
CL10346.Contig5_All	4	3.51	3.94	0.41	0.43	0.59
CL10346.Contig6_All	1.59	1.27	1.44	3.33	3.11	3.13
CL10347.Contig2_All	0.16	0.15	0.72	4.76	6.43	7.62
CL10347.Contig4_All	3.92	5.15	5.22	8.51	10	8.04
CL10348.Contig1_All	0	0	0.18	3.92	2.46	3.18
CL10348.Contig2_All	5.2	5.46	4.1	0.06	0	0
CL10348.Contig3_All	2.4	3.59	3.74	8.73	10.69	9.99
CL1035.Contig1_All	2.35	2.52	4.19	0	0	0.16
CL1035.Contig2_All	1.58	2.64	2.4	0	0	0
CL1035.Contig5_All	0.49	0.39	0.43	0	0	0
CL1035.Contig6_All	0.75	0.65	1.06	0	0	0
CL1035.Contig7_All	5.81	4.36	5.53	2.44	1.95	0.87
CL10351.Contig2_All	4.51	4.24	4.77	0.95	0.84	0.91
CL10351.Contig3_All	1.54	1.45	1.91	4.5	3.69	4.88
CL10351.Contig4_All	4.43	4.63	4.54	8.44	10.1	9.76
CL10352.Contig1_All	1.86	1.43	1.54	0	0	0
CL10352.Contig3_All	0.62	0.51	0.28	2.29	4.42	3.06
CL10353.Contig1_All	2.29	2.63	2.28	0.17	0.2	0.3
CL10353.Contig2_All	0.31	0.22	0.17	2.98	1.86	2.21
CL10353.Contig3_All	0.07	0.1	0.19	1.21	1.67	1.65
CL10353.Contig4_All	2.41	2.08	2.64	0.89	0.62	0.98
CL10354.Contig1_All	0.99	0.83	1.2	5.06	4.37	5.15
CL10354.Contig2_All	7.3	8.66	5.02	0	0	0
CL10354.Contig3_All	0.18	0.37	0	2.42	1.87	2.93
CL10355.Contig1_All	0.4	0.38	0.57	0	0	0
CL10355.Contig3_All	0.21	0.66	0.15	0	0	0
CL10355.Contig4_All	2.42	2.37	2.29	0	0	0
CL10355.Contig5_All	0.94	1.06	0.66	0	0	0
CL10356.Contig2_All	2.91	0.63	0.96	0	0	0.32
CL10359.Contig2_All	6.28	6.6	5.99	0.23	0.15	0.38
CL10360.Contig1_All	22.66	18.08	21.03	0	0	0
CL10360.Contig6_All	25.94	27.1	23.29	20.55	21.52	19
CL10361.Contig10_All	0.16	0.22	0.16	1.04	0.82	0.94
CL10361.Contig13_All	0.6	0.53	0.62	0.37	0.26	0.26
CL10361.Contig14_All	1.06	1.11	1.29	0.56	0.92	0.89
CL10361.Contig15_All	1.73	1.83	1.87	1.2	1.14	0.86
CL10361.Contig18_All	0	0	0	0.71	1.03	0.16
CL10361.Contig19_All	0	0	0	3.37	2.46	3.49
CL10361.Contig22_All	2.96	2.33	3.01	1.3	2.27	1.86
CL10361.Contig23_All	0	0	0	0.22	0.22	0.56
CL10361.Contig3_All	0	0	0	0.22	0.56	0.43
CL10361.Contig4_All	0	0.17	0	1.54	0.88	0.41
CL10361.Contig5_All	0	0	0	0.4	0.74	0.45
CL10361.Contig6_All	0.69	0.62	0.92	0.28	0.25	0.22
CL10361.Contig7_All	1.15	1.02	1.65	0.1	0.13	0.42
CL10361.Contig9_All	0.04	0.08	0.14	0.55	1.29	0.96
CL10363.Contig1_All	0	0.17	0.14	1.94	1.14	2.47
CL10363.Contig2_All	0.12	0.29	0	1.8	0.97	0.87
CL10363.Contig3_All	1.33	1.78	1.48	3.85	3.78	4.36
CL10363.Contig4_All	16.2	14.76	16.99	54.57	51.64	60.84
CL10364.Contig1_All	0.66	1.07	1.15	0.39	0.29	0.18
CL10365.Contig2_All	0.11	0.06	0	3.94	4.03	4.67
CL10365.Contig3_All	1.7	1.38	1.84	3.74	4.45	4.46
CL10365.Contig4_All	6.36	5.28	5.85	5.59	5.21	5.27
CL10366.Contig1_All	0.42	0.43	0.86	3.82	2.04	3.04
CL10367.Contig1_All	3.44	3.9	3.75	7.64	6.24	6.6
CL10367.Contig2_All	5.58	6.09	5.58	9.42	9.22	8.18
CL10367.Contig3_All	0.9	1.12	0.97	6.58	6.45	6.78
CL10367.Contig4_All	13.76	13.96	12.47	5.23	5	4.3
CL10369.Contig1_All	6.81	5.95	5.69	32.6	36.14	33.16
CL10369.Contig2_All	10.71	10.73	10.6	1.55	1.96	1.37
CL1037.Contig3_All	0.55	2.14	1.36	0	0	0
CL1037.Contig4_All	0.58	0.5	0	3.3	3.95	3.38
CL1037.Contig7_All	11.07	7.9	7.8	5.06	4.21	4.35
CL1037.Contig8_All	2.08	3.57	4.21	10.27	8.82	11.61
CL10370.Contig2_All	0.7	0.53	0.23	2.83	3.3	1.9
CL10370.Contig3_All	2.22	3.01	2.28	1.64	1.53	1.87
CL10371.Contig2_All	1.51	1.7	0.87	0.18	0.14	0.1
CL10371.Contig4_All	0.51	0.57	0.43	4.42	4.32	3.75
CL10371.Contig5_All	7.1	10	9.86	0.98	1.5	0.73
CL10373.Contig1_All	0.24	0.13	0.16	0.6	1.66	1.83
CL10373.Contig2_All	0.16	0.09	0.29	1.57	1.37	1.41
CL10373.Contig3_All	4.47	4.59	3.62	2.2	1.73	2.44
CL10374.Contig1_All	2.61	2.35	1.73	1.81	1.56	0.88
CL10374.Contig2_All	2.99	2.42	2.68	0.32	0.03	0.37
CL10375.Contig1_All	0	0	0	1.52	5.62	1.5
CL10376.Contig2_All	3.91	3.68	3.64	12.97	13.01	14.04
CL10376.Contig3_All	4.18	4.41	4.58	0.82	0.65	0.7
CL10377.Contig1_All	1.02	0.94	1.19	0.67	0.58	0.48
CL10377.Contig4_All	1.27	1.64	0.98	0.77	0.72	0.59
CL10379.Contig1_All	12.88	12.03	12.12	6.55	6.74	5.02
CL10379.Contig4_All	0.26	0.09	0.1	0.83	0.96	0.81
CL10379.Contig5_All	8.86	8.4	7.95	7.17	8.03	6.79
CL10379.Contig6_All	1.63	1.69	1.93	7.04	6.63	6.44
CL1038.Contig3_All	1.19	1.25	1.34	0.95	0.98	0.89
CL10380.Contig2_All	0	0	0	1.48	1.65	2.83
CL10381.Contig5_All	0.64	0.67	0.51	2.72	3.03	2.67
CL10381.Contig6_All	2.15	1.69	2.25	0	0	0
CL10382.Contig1_All	4.93	6.68	6.32	2.49	2.34	3.05
CL10382.Contig2_All	0.76	0.75	0.64	3.36	3.65	3.89
CL10382.Contig3_All	2.02	1.49	1.99	0.82	1.34	1.37
CL10382.Contig4_All	0.64	0.83	0.85	2.98	2.98	3.34
CL10383.Contig1_All	0.72	0.41	0.93	4.02	2.67	3.9
CL10383.Contig3_All	2.65	1.99	3.52	0.95	1.95	0.78
CL10385.Contig1_All	3.7	3.98	3.33	0.41	0.77	0.49
CL10386.Contig1_All	0.81	1.07	0.86	0.45	0.45	0.35
CL10387.Contig2_All	1.86	2.68	2.91	0	0	0
CL10388.Contig4_All	1.75	1.85	2.13	0	0	0
CL10389.Contig1_All	6.6	5.25	5.67	10.63	9.3	9.38
CL10389.Contig2_All	2.62	3.38	3.96	7.14	5.85	6.88
CL10389.Contig4_All	1.44	0.55	1.08	1.92	2.09	3
CL1039.Contig1_All	0	0.45	0.21	12.98	12.98	14.07
CL1039.Contig2_All	73.9	74.97	73.08	64.58	63.43	60.32
CL1039.Contig3_All	58.14	56.01	53.21	40.18	45.19	38.26
CL1039.Contig4_All	54.1	51.03	52.59	57.31	57.41	55.56
CL10390.Contig1_All	1.65	1.41	2	3.72	4.82	6.39
CL10390.Contig3_All	6.89	6.6	6.44	3.88	5.38	6.04
CL10391.Contig1_All	2.03	2.63	2.28	4.84	6.53	7.46
CL10392.Contig2_All	0.75	1	0.41	2.84	2.48	3.2
CL10393.Contig1_All	0.42	0.45	0.46	4.66	2.82	2.3
CL10395.Contig1_All	0.46	0.24	0.17	3.64	4.81	4.94
CL10395.Contig2_All	0.41	0.57	0.12	0.93	1.09	1.07
CL10395.Contig3_All	4.46	4.59	3.25	0.6	0.35	0.36
CL10395.Contig4_All	2.24	2	2.91	1.12	0.7	0.83
CL10395.Contig5_All	7.56	6.58	8.38	4.68	5.01	5.94
CL10397.Contig1_All	4.23	3.13	4.89	2.15	2.51	1.35
CL10398.Contig1_All	0.72	1.11	0.46	0.32	0.43	0.1
CL10398.Contig3_All	2.96	2.1	3.41	0.98	1.93	1.64
CL10398.Contig5_All	6.7	7.35	6.38	21.36	24.27	27.42
CL10399.Contig2_All	0.5	1.89	2.46	6.64	5.28	4.1
CL104.Contig10_All	0.08	0.04	0	4.75	4.07	4.77
CL104.Contig11_All	0.07	0	0.14	3.84	1.42	2.31
CL104.Contig12_All	0.2	0.22	0.27	3.97	5.39	5.43
CL104.Contig13_All	7.75	9.4	10.69	0	0	0
CL104.Contig14_All	3.35	2.22	3.74	1.06	0.49	0.29
CL104.Contig15_All	1.59	1.2	0.88	0.33	0.31	0.36
CL104.Contig16_All	7.27	7.28	7.32	0	0	0
CL104.Contig1_All	0.94	0.78	0.92	0	0	0
CL104.Contig2_All	1.38	1.89	1.48	11.56	10.74	11.05
CL104.Contig3_All	0	0	0	5.64	5.48	5.14
CL104.Contig4_All	0.88	1.03	0.67	0	0	0.07
CL104.Contig5_All	1.05	1.14	1.71	0.78	0.68	0.78
CL104.Contig6_All	12.53	11.84	13.06	0	0.03	0
CL104.Contig7_All	0	0	0	2.09	2.42	2.96
CL104.Contig9_All	0.6	0.86	0.88	2.38	2.81	4.05
CL1040.Contig10_All	35.84	36.79	34.56	4.48	3.8	4.16
CL1040.Contig11_All	39.46	41.8	42.9	64.59	60.08	67.68
CL1040.Contig12_All	49.22	51.98	54.37	12.63	10.99	11
CL1040.Contig2_All	0	0	0	3.58	3.27	3.21
CL1040.Contig3_All	0	0	0	2.65	3.81	3.73
CL1040.Contig4_All	9.69	10.17	10.5	4.54	3.68	4.4
CL1040.Contig5_All	0.77	1.08	1.02	9.04	9.81	9.21
CL1040.Contig6_All	4.35	4.34	4.35	13.02	13.7	11.28
CL1040.Contig7_All	2.48	2.29	2.43	8.08	8.13	8.47
CL1040.Contig8_All	6.47	6.13	5.62	12.86	14.1	12.85
CL1040.Contig9_All	16.2	16.45	14.91	0.52	0.16	0.27
CL10400.Contig1_All	1.9	1.56	0.43	0.24	0.52	0
CL10400.Contig2_All	2.71	3.59	3.36	2.73	1.83	2.29
CL10400.Contig3_All	0.46	0.48	0.79	0.14	0.22	0.35
CL10400.Contig4_All	3.07	1.98	2.64	8.3	9.18	8.61
CL10400.Contig5_All	1.1	0.36	1.84	0	0	0
CL10401.Contig2_All	1.09	1.13	1.22	0	0.05	0.24
CL10401.Contig3_All	0.49	0.39	0.54	0.27	0.19	0
CL10401.Contig5_All	3.38	5.33	4.29	0	0.05	0
CL10401.Contig6_All	0.9	1.06	0.84	6.92	6.61	5.64
CL10402.Contig1_All	0	0	0	0	0.8	0.99
CL10402.Contig2_All	4.2	5.11	4.55	5.03	4.13	3.94
CL10402.Contig3_All	0.43	0.16	0.19	0	0	0
CL10402.Contig4_All	4.46	4.21	4.54	0.21	1.46	0.34
CL10402.Contig5_All	2.35	3.83	2.9	7.84	7.98	4.94
CL10402.Contig6_All	4.17	3.59	4.23	8.95	8.99	9.46
CL10404.Contig1_All	6.12	5.85	6.01	1.51	1.42	1
CL10404.Contig2_All	1.35	1.09	0.89	4.75	5.02	5.66
CL10405.Contig1_All	0	0	0	2.35	1.93	1.7
CL10405.Contig2_All	1.45	1.52	0.65	0	0	0
CL10406.Contig1_All	4.06	3.99	3.75	0.11	0	0
CL10406.Contig2_All	2.87	3.59	2.51	1.59	1.89	1.38
CL10406.Contig3_All	2.29	3.04	3.77	14.62	15.26	14.62
CL10406.Contig4_All	2.4	1.43	2.44	0.27	0.49	0.32
CL10406.Contig5_All	2.25	2.24	1.64	0.2	0.15	0.3
CL10406.Contig6_All	13.07	13.49	13.5	10.81	8.48	8.81
CL10407.Contig1_All	0.14	0	0.28	2.56	4.98	2.8
CL10407.Contig2_All	0.39	0	0	2.29	3.97	3.9
CL10408.Contig1_All	1.73	1.23	1.43	7.97	8.4	7.59
CL10408.Contig2_All	3.96	3.06	4.23	6.37	5.71	6.22
CL10408.Contig3_All	9.73	9.78	8.48	2.95	2.66	2.73
CL10408.Contig4_All	2.7	2.54	3.11	1.62	1.67	1.38
CL1041.Contig1_All	0.41	0.42	0.47	4.21	3.52	3.42
CL1041.Contig3_All	1.66	1.67	1.22	0	0	0
CL10411.Contig1_All	0.95	0.85	0.54	3	2.83	3.22
CL10411.Contig3_All	2.54	2.05	2.93	1.45	1.6	1.53
CL10411.Contig4_All	0.41	0.52	0.48	3.49	4.19	4.18
CL10411.Contig5_All	0.79	1.49	1.51	0.39	0.9	0.64
CL10411.Contig6_All	2.9	3.16	2.64	11.84	11.54	10.61
CL10413.Contig3_All	1.23	0.97	1.49	0.29	0.32	0.39
CL10414.Contig3_All	0.56	0.43	0.3	7.04	5.75	6.11
CL10414.Contig4_All	6.96	7.57	7.63	4.02	2.04	2.94
CL10415.Contig1_All	5.4	7.89	5.84	14.13	10.91	16.04
CL10415.Contig3_All	3.16	3.49	3.38	28.27	27.34	32.49
CL10417.Contig2_All	1.62	1.29	1.88	0.85	1.04	1.02
CL1042.Contig1_All	0	0	0	0.89	0.18	1.96
CL1042.Contig4_All	1.36	1.53	1.41	4.84	4.25	3.96
CL1042.Contig5_All	0.09	0	0.18	0.71	0.78	0.49
CL1042.Contig6_All	0.54	0.57	0.54	2.28	2.55	2.47
CL1042.Contig7_All	4.61	4.65	5.04	3.07	3.09	2.91
CL10420.Contig1_All	0.68	1.41	0.7	0	0	0
CL10420.Contig2_All	1.44	2.25	1.87	0	0	0
CL10420.Contig4_All	1.34	2.2	2.05	6.69	6.08	6.61
CL10421.Contig1_All	0.31	0.26	0.19	4.85	4.59	4.09
CL10421.Contig3_All	2.11	1.96	1.82	1.38	0.99	0.97
CL10423.Contig3_All	0.69	0.48	0.73	7.91	8.43	7.79
CL10424.Contig1_All	1.37	1.07	1.25	0	0	0
CL10424.Contig2_All	1.03	2.25	1.56	7.75	7.64	8.04
CL10425.Contig1_All	14.39	14.61	14.99	14.86	13.69	14.87
CL10426.Contig1_All	1.34	1.16	1.51	0.26	0.67	0.3
CL10426.Contig3_All	0	0	0	0.84	0.61	0.48
CL10427.Contig1_All	2.35	1.25	1.98	4.15	4.22	3.86
CL10427.Contig3_All	2.71	3.29	2.88	4.81	5.22	5.15
CL10427.Contig4_All	2.1	1.92	2.18	1.33	1.57	1.24
CL10427.Contig5_All	3.46	3.67	4.39	0.17	0	0.17
CL10427.Contig6_All	1.53	0.89	1.39	0.56	0.75	0.55
CL10427.Contig7_All	0.49	0.57	0.28	2.8	2.78	2.95
CL10428.Contig3_All	1.27	0.75	1.17	0.46	0.19	0.21
CL10429.Contig1_All	0.41	0.43	0.86	0	0	0
CL10429.Contig2_All	4.08	3.58	3.07	6.24	6.75	5.99
CL10430.Contig1_All	0.96	2.32	0.96	0	0	0
CL10431.Contig1_All	6.98	9.02	7.28	1.69	3.02	2.36
CL10431.Contig2_All	2.25	0.87	1.16	22.97	22.93	20.61
CL10431.Contig3_All	9.16	8.66	9.04	41.3	42.92	44.65
CL10431.Contig4_All	6.81	6.46	6.08	0.37	0.55	0.64
CL10431.Contig5_All	33.12	33.75	29.22	51.15	53.65	52.74
CL10432.Contig1_All	9.7	11.76	11.17	9.28	9.14	9.44
CL10432.Contig2_All	9.21	9.51	9.32	15	15.83	14.35
CL10433.Contig1_All	0	0	0	1.08	1.26	1.51
CL10433.Contig2_All	0	0.11	0.06	0.81	0.75	1.11
CL10434.Contig1_All	0.15	0.15	0.3	12.03	10.97	9.28
CL10435.Contig1_All	0.23	0.85	1.25	0.13	0	0.25
CL10435.Contig2_All	2.33	1.43	3.46	0.26	0	0
CL10435.Contig3_All	0.97	1.18	0.83	4.2	3.77	4.01
CL10436.Contig1_All	1.21	0.82	1.37	0.06	0	0
CL10436.Contig2_All	0.9	1.09	0.89	5.03	6.03	5.62
CL10436.Contig3_All	2.15	2.82	2.67	0.6	0.77	0.68
CL10436.Contig4_All	6.05	6.49	5.11	4.45	3.82	3.41
CL10437.Contig1_All	107.87	100.14	101.3	104.1	110.33	115.93
CL10437.Contig2_All	2	2.32	2.06	10.33	7.18	8.55
CL10439.Contig1_All	0.52	0.85	0.79	7.9	6.79	6.63
CL10439.Contig2_All	7.26	7.37	7.85	3.56	3.77	3.64
CL1044.Contig1_All	0.25	0.58	0.34	0.25	0.1	0.04
CL1044.Contig3_All	1.72	1.97	1.58	0.36	0	0.13
CL1044.Contig4_All	2.48	2.71	1.9	1.31	0.97	1.44
CL1044.Contig5_All	1.25	0.9	0.83	0.08	0.11	0.32
CL1044.Contig6_All	1.2	1.19	1.09	6.81	7.05	6.64
CL1044.Contig8_All	4.48	4.07	3.32	1.43	0.89	1.78
CL10440.Contig1_All	4.01	4.86	5.57	2.39	1.59	1.78
CL10440.Contig3_All	0.86	0.39	0.29	2.47	1.72	1.75
CL10440.Contig4_All	2.59	2.98	3.28	0.3	0.69	0.74
CL10441.Contig1_All	0.58	0.83	0.56	3.01	1.52	2.14
CL10441.Contig3_All	3.39	3.48	2.9	1.64	1.06	1.49
CL10441.Contig4_All	0.44	0.67	0.4	4.38	3.64	3.76
CL10441.Contig6_All	1.65	1.6	2.32	5.09	4.6	4.74
CL10441.Contig7_All	3.44	3.21	3.83	2.54	2.25	1.75
CL10441.Contig8_All	1.95	2.24	1.95	1.05	1.36	1.33
CL10442.Contig1_All	0.65	0.75	0.58	2.32	1.77	2.87
CL10443.Contig1_All	0	0.11	0	1.15	0.85	0.84
CL10443.Contig2_All	0.51	0.87	1.12	5.19	4.29	6.59
CL10443.Contig3_All	0.08	0.21	0.04	1.63	1.38	1.07
CL10444.Contig1_All	2.03	1.89	1.69	0.46	0.63	0.61
CL10444.Contig2_All	0.59	1.12	1.22	5.06	4.4	3.63
CL10444.Contig3_All	1.91	2.3	2.42	0	0.32	0.35
CL10444.Contig4_All	0.33	0.55	0.43	5.65	5.52	6.18
CL10444.Contig5_All	4.49	4.61	4.92	1.92	1.45	1.67
CL10444.Contig6_All	0	0	0.13	0.45	0.44	0.35
CL10444.Contig8_All	3.74	3.67	3.84	6.71	5.91	5.09
CL10444.Contig9_All	0.15	0.22	0.18	2.47	2.44	1.65
CL10445.Contig3_All	0	0	0	5.24	4.73	4.31
CL10445.Contig5_All	3.35	2.88	2.86	2.91	2.05	1.7
CL10446.Contig1_All	1.87	1.92	1.6	0.76	0.65	1.28
CL10446.Contig3_All	1.63	2.04	0.6	0.49	0.49	0.6
CL10447.Contig1_All	3.66	3.93	5.27	0.16	0.59	0.3
CL10447.Contig3_All	0.83	0.52	0.27	2.1	3.33	3.22
CL10447.Contig4_All	0.99	2.03	2.22	9.36	7.04	8.76
CL10447.Contig6_All	3.54	5.91	5.76	21.4	21.83	21
CL10447.Contig7_All	31.64	36.14	31.83	6	7.12	7.43
CL10448.Contig2_All	0.97	0.93	1.15	9.63	11.15	9.79
CL10448.Contig3_All	26.33	24.27	23.91	10.64	8.52	8.2
CL1045.Contig10_All	1.97	2.88	2.53	1.11	1.28	1.1
CL1045.Contig1_All	4.67	4.06	2.02	0.52	0	0
CL1045.Contig2_All	0.81	0	0.88	0	0	0
CL1045.Contig3_All	4.69	4.91	5.05	0.18	0.31	0.38
CL1045.Contig4_All	2.44	2.66	2.11	0.33	0.35	0.48
CL1045.Contig5_All	0.63	0.46	0.56	0	0	0
CL1045.Contig6_All	0.28	0.58	0.46	0	0.24	0.09
CL1045.Contig7_All	0	0	0.51	1.19	1.67	2.31
CL1045.Contig8_All	5.32	3.62	4.77	0.16	0.31	0.07
CL1045.Contig9_All	6.25	8.61	9.05	6.86	7.17	6.75
CL10450.Contig1_All	1.25	2.08	1.75	8.12	6.86	7.44
CL10450.Contig2_All	4.22	4.3	3.77	6.69	5.63	6.75
CL10450.Contig3_All	0	0	0.05	0.47	0.2	0.87
CL10450.Contig4_All	5.64	5.88	5.93	1.13	1.24	1.12
CL10451.Contig2_All	115.06	123.5	118.33	98.73	98.79	97.13
CL10452.Contig1_All	4.88	3.73	3.89	0	0.1	0.1
CL10452.Contig2_All	26.26	24.91	23.64	23.6	23	23.75
CL10454.Contig1_All	0.72	0.56	0.57	0	0	0
CL10454.Contig2_All	14.12	13.66	14	7.24	6.68	8.57
CL10454.Contig4_All	1.67	1.79	1.77	12.44	12.88	13.04
CL10454.Contig5_All	1.56	2.66	2.21	0.54	0.41	0.38
CL10454.Contig6_All	2.36	2.81	3.77	2.47	2.73	1.77
CL10456.Contig1_All	0	0	0	0.48	0.36	0.35
CL10457.Contig2_All	5.53	4.54	5.67	7.27	9.47	9.67
CL10457.Contig3_All	11.78	11.55	13.98	3.49	3.74	5.75
CL10458.Contig1_All	0	0	0.21	2.13	2.57	2.99
CL10458.Contig3_All	0.73	0.75	1.15	13.26	11.21	11.58
CL10458.Contig5_All	9.02	7.68	10.55	16.91	17.48	16.8
CL10458.Contig6_All	8.8	10.9	7.58	8.97	6.21	6.88
CL10459.Contig1_All	0	0	0	2.98	2.23	1.3
CL10459.Contig3_All	1.32	1.35	0.81	0	0	0
CL1046.Contig1_All	107.4	105.61	98.46	110.22	108.3	120.73
CL1046.Contig2_All	100.68	97.81	92.05	91.93	84.49	88.15
CL10460.Contig2_All	0	0.21	0.28	0.97	1.64	1.12
CL10460.Contig3_All	1.98	2.52	1.91	1.46	1.76	1.46
CL10462.Contig2_All	0.54	0.74	0.67	1.98	2.66	1.83
CL10463.Contig1_All	3.18	4.06	3.27	0	0	0
CL10463.Contig2_All	0	0.2	0	7.91	7.32	9.12
CL10463.Contig3_All	2.19	1.82	1.86	0.86	1.51	1.46
CL10464.Contig1_All	1.7	1.89	1.5	4.71	4.94	4.5
CL10464.Contig2_All	0.74	0.66	0.27	0	0	0
CL10464.Contig3_All	0.77	1.97	1.83	9.59	9.59	9.56
CL10464.Contig4_All	18.06	20.28	18.57	0.05	0	0
CL10464.Contig5_All	2.08	1.93	1.59	5.04	6.55	7.24
CL10465.Contig1_All	19.04	19.05	23.39	0.17	0	0.82
CL10465.Contig2_All	48.72	52.56	47.82	69.11	74.22	78.35
CL10466.Contig1_All	10.27	9.72	9.65	0.21	0	0
CL10466.Contig2_All	1.03	1.27	1.59	15.39	17.38	15.44
CL10467.Contig1_All	1.13	0.57	0.94	3.76	4.58	4.17
CL10467.Contig2_All	0.91	0.71	0.51	0	0	0
CL10467.Contig3_All	6.52	7.53	7.42	2.72	2.97	3.3
CL10467.Contig5_All	0.62	0.66	2.33	0	0	0
CL10468.Contig1_All	11.23	11.13	10	8.97	8.36	8.15
CL10469.Contig2_All	1.54	2.13	1.99	0.15	0.82	0.77
CL10469.Contig3_All	1.52	1.45	2.04	8.85	10.69	9.51
CL10469.Contig5_All	19.82	21.98	18.99	2.37	1.31	2.21
CL1047.Contig1_All	1.31	0.33	0.99	0.08	0	0
CL1047.Contig2_All	37.9	40.9	39.41	15.54	14.15	13.12
CL1047.Contig3_All	5.46	5.63	6.22	42.84	40.62	41.41
CL1047.Contig4_All	4.18	3.81	3.71	29.22	28.33	30.4
CL1047.Contig5_All	4.45	4.88	4.98	2.84	3.58	3.19
CL1047.Contig7_All	6.01	7.7	6.73	1.32	1.19	1.4
CL1047.Contig8_All	0.19	0.08	0.13	30.63	32.46	30.76
CL1047.Contig9_All	3.05	2.7	3.16	0.04	0.05	0.04
CL10470.Contig3_All	0.18	0.14	0.05	1.48	1.4	1.25
CL10470.Contig4_All	0.35	0.29	0.18	0	0	0
CL10470.Contig5_All	0.55	0.71	0.11	11.05	9.31	10.78
CL10470.Contig6_All	0.51	1.13	0.44	2.32	2.13	2.41
CL10470.Contig7_All	0.57	0.99	1.47	0.25	0.07	0.13
CL10470.Contig8_All	1.49	0.88	1.52	4.66	4.05	3.71
CL10472.Contig3_All	2.11	2.1	2.12	1.45	0.73	1.88
CL10473.Contig2_All	1.76	1.65	2.48	1.17	1.54	1.32
CL10473.Contig3_All	2.19	2.52	2.71	9.23	9.36	8.42
CL10474.Contig2_All	0.99	0.87	0.95	0.09	0.08	0
CL10474.Contig3_All	0.09	0	0.06	2.69	2.98	2.23
CL10474.Contig4_All	7.52	5.16	5.74	0.47	1	0.65
CL10475.Contig2_All	9.16	8.95	9.07	0.46	0.28	0
CL10476.Contig2_All	43.23	49.64	47.7	47.79	45.81	46.94
CL10476.Contig3_All	10.29	8.96	8.88	1.23	0.96	2.53
CL10477.Contig2_All	0.35	0.18	0.09	1.09	0.81	1.25
CL10478.Contig1_All	0	0	0.09	1	1.08	1.67
CL10478.Contig2_All	0	0	0	0.85	0.68	0.58
CL10479.Contig1_All	1.1	0.99	1.27	0.38	0.15	0.15
CL10480.Contig1_All	0.86	1.96	1.06	0.18	0.18	0.31
CL10480.Contig2_All	6.24	5.81	6.83	0	0.16	0
CL10480.Contig3_All	1.14	0.38	0.92	3.88	4.69	4.24
CL10481.Contig1_All	0.9	1.95	1.46	0	0	0
CL10483.Contig1_All	0.05	0.05	0.39	3.31	3.3	2.82
CL10483.Contig2_All	0.67	0.69	0.59	5.62	4.58	4.24
CL10484.Contig1_All	2.47	2.16	2.43	4.77	3.79	4.13
CL10484.Contig2_All	2.51	1.39	1.64	3.56	3.88	4.64
CL10484.Contig3_All	3.24	3.05	2.84	6.96	6.67	6.86
CL10484.Contig4_All	4.56	6.39	5.35	2.52	3.37	2.97
CL10484.Contig5_All	1.19	0.86	1.17	0.58	0.38	0.5
CL10485.Contig1_All	0.51	0.6	0.62	2.27	1.94	1.96
CL10485.Contig2_All	1.69	2.19	1.78	5.74	5.7	5.58
CL10485.Contig4_All	1.33	1.8	1.37	0.05	0	0
CL10486.Contig1_All	27.18	29.63	27.58	39.29	41.71	40.03
CL10486.Contig2_All	11.78	9.97	11.08	19.21	18.65	20.45
CL10486.Contig3_All	49.52	46.6	52.34	75.42	79.16	75.79
CL10488.Contig1_All	7.18	7.93	6.98	2.26	2.34	2.4
CL10488.Contig2_All	1.16	0.71	0.98	5.09	4.42	4.13
CL10488.Contig3_All	1.19	1.04	1.38	8.07	7.36	8.17
CL10489.Contig1_All	2.04	0.3	1.57	0	0	0
CL1049.Contig4_All	2.35	2.6	1.94	0.89	0.84	0.68
CL1049.Contig6_All	0.49	0.33	0.78	0.14	0.11	0.13
CL10490.Contig4_All	3.5	2.76	4.81	1.45	1.86	2.19
CL10490.Contig5_All	1.81	1.56	1.89	0.26	0.07	0.22
CL10490.Contig6_All	0.7	0.25	0.45	8.31	7.15	6.55
CL10491.Contig2_All	0.24	0.45	0.27	1.83	1.91	2.07
CL10492.Contig1_All	2.48	2.82	3.18	0	0	0
CL10492.Contig2_All	6.71	4.91	8.26	5.54	4.64	5.3
CL10492.Contig3_All	0.16	0.7	0.52	6.12	5.3	6.68
CL10493.Contig2_All	1.57	2.72	1.53	0.37	0.31	0.61
CL10493.Contig3_All	1.19	0.99	0.42	0	0.13	0
CL10493.Contig4_All	0.17	0	0.21	3.52	4.32	4.01
CL10494.Contig1_All	0.24	0.23	0	2.22	1.83	1.75
CL10494.Contig2_All	3.41	2.95	3.8	2.02	2.37	1.4
CL10495.Contig1_All	4.64	4.66	5.1	4.34	3.95	4.25
CL10495.Contig2_All	1.92	2.32	2.65	5.61	6.04	5.55
CL10499.Contig1_All	0.31	0.3	0.4	1.82	0.78	0.89
CL10499.Contig2_All	1.22	1.32	1.27	4.93	5.24	6.18
CL105.Contig10_All	6.4	4.4	5.92	17.84	14.91	15.28
CL105.Contig11_All	5.15	5.57	5.91	0.2	0	0
CL105.Contig12_All	0.72	0.88	0.91	0.25	0.15	0.36
CL105.Contig2_All	1.26	1.1	1.37	5.47	6.02	5.5
CL105.Contig3_All	5.82	7.33	6.94	0.06	0	0
CL105.Contig4_All	0.11	0.33	0.51	0	0	0.06
CL105.Contig6_All	0.9	1.59	0.43	0	0	0
CL105.Contig7_All	1.46	1.25	1.11	4.36	4.22	4.98
CL105.Contig8_All	0.43	0.35	0.21	6.03	4.92	5.35
CL105.Contig9_All	0.07	0	0	0.34	0.13	0.48
CL1050.Contig12_All	0	0	0	2.05	2.31	2.61
CL1050.Contig13_All	1.64	2.64	2.37	0	0	0
CL1050.Contig14_All	2.1	2.74	1.66	0.17	0.08	0.04
CL1050.Contig17_All	1.91	1.65	1.48	0	0.29	0.14
CL1050.Contig18_All	4.82	4.26	4.15	0	0	0
CL1050.Contig20_All	2.53	2.35	2.59	0	0	0
CL1050.Contig23_All	0	0	0	1.37	1.36	2.02
CL1050.Contig24_All	2.21	2.33	1.62	0.77	0.77	0.76
CL1050.Contig27_All	0.13	0.05	0	0.73	0.99	0.57
CL1050.Contig28_All	0.31	0.44	0.34	0.24	0	0.12
CL1050.Contig29_All	0.92	0.57	1.06	0.61	0.39	0.34
CL1050.Contig2_All	0	0	0	2.11	3.41	3.4
CL1050.Contig30_All	1.46	2.45	2.86	8.78	7.67	8.7
CL1050.Contig31_All	1.84	1.69	1.5	0.65	0.75	0.54
CL1050.Contig33_All	0.1	0.08	0.17	0	0	0
CL1050.Contig34_All	1.04	1.08	0.68	0	0	0
CL1050.Contig36_All	2.31	3.37	3.49	0.15	0.22	0.36
CL1050.Contig37_All	2.66	1.97	1.14	0	0	0
CL1050.Contig38_All	1.69	1.11	1.58	0	0	0.15
CL1050.Contig39_All	3.15	2.88	3.1	0	0	0
CL1050.Contig3_All	0	0	0	4.86	3.44	2.42
CL1050.Contig40_All	5.31	5.09	5.73	0	0	0
CL1050.Contig42_All	1.85	0.99	2	0	0	0
CL1050.Contig45_All	0.36	0.82	1.08	0	0	0
CL1050.Contig46_All	0.26	0.16	0	0	0	0
CL1050.Contig47_All	0.95	0.98	0.63	0	0	0
CL1050.Contig48_All	3.96	3.12	2.71	0	0	0
CL1050.Contig4_All	1.29	1.06	1.44	0.17	0	0
CL1050.Contig5_All	3.04	2.19	1.75	0	0	0
CL1050.Contig6_All	1.31	2.29	2.55	0	0	0
CL1050.Contig8_All	1.4	1.02	1.56	0	0	0
CL1050.Contig9_All	0.11	0.21	0.22	0	0	0
CL10500.Contig1_All	6.1	6.79	7.67	1.45	1.21	1.2
CL10500.Contig2_All	2.11	2.08	2.18	6.66	6.61	6.84
CL10501.Contig2_All	0	0	0	63.37	59.73	71.52
CL10501.Contig4_All	20.5	18.15	23.76	41.98	40.69	44.41
CL10502.Contig2_All	4	3.52	3.98	5.59	6.74	6.22
CL10504.Contig1_All	1.77	2.51	2.22	0	0	0
CL10505.Contig2_All	0	0	0	0.7	1.28	0.63
CL10506.Contig2_All	1.9	2.23	2.05	0.05	0.05	0.08
CL10506.Contig3_All	0.42	1.06	0.74	0.08	0.1	0.07
CL10506.Contig4_All	1.69	2.82	2.41	0.53	0.55	0.48
CL10506.Contig5_All	0.73	0.63	0.99	5.51	4.21	4.52
CL10507.Contig1_All	1.07	0.67	0.61	0	0	0
CL10507.Contig2_All	0.43	0.88	0.68	1.5	1.49	1.45
CL10507.Contig3_All	1.36	1.42	0.89	0	0	0
CL10508.Contig4_All	1.27	0.65	0.89	0	0	0
CL10508.Contig5_All	0.21	0.2	0.2	2.38	2.33	1.84
CL10509.Contig2_All	5.87	6.55	5.5	0.19	0.44	0.51
CL10509.Contig3_All	5.97	6.04	3.98	0.95	0.23	0.23
CL1051.Contig10_All	0.08	0	0	3.57	4	2.24
CL1051.Contig11_All	0.11	0	0	0.47	0.31	0.36
CL1051.Contig12_All	0	0	0	0.62	1.26	1.36
CL1051.Contig13_All	0.3	0.28	0.68	0.25	0.1	0.1
CL1051.Contig14_All	1	1.21	0.91	0.03	0.1	0.14
CL1051.Contig18_All	1.11	1.26	1.28	0.2	0.22	0
CL1051.Contig19_All	0.37	0.67	0.25	0.09	0.3	0.09
CL1051.Contig1_All	1.66	1.12	1.53	0	0	0
CL1051.Contig20_All	0.02	0.02	0.03	1.67	1.11	1.17
CL1051.Contig21_All	0	0	0	1.03	1.28	1.59
CL1051.Contig22_All	0.7	0.74	0.72	0.3	0.31	0.66
CL1051.Contig23_All	0.94	0.81	1.29	0.3	0.58	0.58
CL1051.Contig24_All	3.55	3.42	4.04	3.08	2.94	2.91
CL1051.Contig25_All	0	0.26	0.11	2.53	2.22	1.5
CL1051.Contig26_All	0.46	0.28	0.67	0.35	0.24	0.13
CL1051.Contig27_All	0	0	0	1.18	0.6	0.64
CL1051.Contig28_All	2.07	1.45	1.76	0	0	0
CL1051.Contig2_All	0	0.07	0	0.68	0.12	1.09
CL1051.Contig30_All	0.2	0	0.07	0.65	0.78	0.55
CL1051.Contig31_All	2.78	3.21	2.94	0	0	0
CL1051.Contig32_All	0.07	0.05	0	0.6	0.26	0.52
CL1051.Contig33_All	0	0	0	0.61	0.23	0.58
CL1051.Contig3_All	0	0	0	1.35	0.87	1.07
CL1051.Contig6_All	0	0	0	0.72	0	0.8
CL1051.Contig7_All	0.5	1.1	0.27	0	0	0
CL1051.Contig8_All	0.23	0.53	0.52	0.26	0.1	0.02
CL1051.Contig9_All	0.12	0.23	0.24	0.82	1.52	0.97
CL10510.Contig1_All	4.67	4.88	5.2	2.04	3.1	3.02
CL10510.Contig2_All	7.51	6.64	5.54	2.93	3.33	2.79
CL10511.Contig10_All	0.08	0.07	0.17	0	0	0
CL10511.Contig15_All	0.64	0.8	0.77	0.43	0.12	0.14
CL10511.Contig17_All	0.18	0.3	0.13	1.27	0.78	0.85
CL10511.Contig18_All	0.74	1.39	1.54	0	0.04	0.06
CL10511.Contig19_All	0.33	0.51	0.95	0.15	0	0.17
CL10511.Contig20_All	0.06	0	0.16	0.36	0.34	0.51
CL10511.Contig24_All	0.34	0.12	0.25	1.11	0.93	1.1
CL10511.Contig25_All	1.64	1.88	1.81	0	0	0
CL10511.Contig26_All	1.24	1.46	0.9	0.45	0.46	0.47
CL10511.Contig27_All	0.13	0.11	0.13	0	0	0
CL10511.Contig2_All	1.02	0.71	0.47	3.03	2.86	2.2
CL10511.Contig32_All	0.48	0.23	0.31	1.11	0.99	1.1
CL10511.Contig36_All	0.43	0.16	0.3	0	0.14	0.06
CL10511.Contig37_All	0.28	0.65	0.4	2.88	3.04	2.93
CL10511.Contig38_All	0.17	0.25	0.05	0.81	1.03	0.53
CL10511.Contig3_All	0	0	0	0.47	0.45	0.93
CL10511.Contig4_All	0	0	0	1.34	0.79	0.85
CL10511.Contig5_All	1.2	0.25	0.49	0	0.26	0.08
CL10511.Contig6_All	0.05	0	0.12	1.11	1.28	1.14
CL10511.Contig7_All	0	0.47	0.9	0	0	0
CL10511.Contig9_All	1.55	1.05	1.21	0.01	0.09	0
CL10512.Contig1_All	5.28	4.07	5.61	1.08	0.36	0.88
CL10512.Contig2_All	34.99	29.81	28.5	8.29	7.78	7.08
CL10512.Contig3_All	88.31	81.78	87.04	51.75	46.93	52.53
CL10512.Contig4_All	0	0	0	21.75	22.91	21.91
CL10513.Contig2_All	0.67	1.29	1.15	3.03	2.74	3.59
CL10513.Contig3_All	0.51	0.47	0.57	1.27	1.2	1.1
CL10513.Contig4_All	2.01	1.46	1.92	1.35	1.14	0.9
CL10513.Contig6_All	4.6	4.62	4.79	4.35	4.29	4.95
CL10514.Contig1_All	2.22	2.33	2	15.01	14.79	15.62
CL10514.Contig2_All	16.91	18.46	17.63	1.97	2.51	1.65
CL10515.Contig1_All	25.15	28.1	25.45	21.9	24.74	25.41
CL10515.Contig2_All	5.94	5.46	4.93	18.87	18.11	21.03
CL10515.Contig3_All	13.38	15.08	13.88	6.75	8.56	8.22
CL10515.Contig4_All	17.25	17.77	18.94	70.04	76.05	82.21
CL10516.Contig1_All	0.44	0.53	0.48	3.74	3.74	4.23
CL10516.Contig2_All	3.45	4.6	4.26	2.56	2.5	3.08
CL10517.Contig1_All	0.2	0.21	0	6.91	6.93	6.17
CL10517.Contig2_All	2.34	4.7	3.96	0.57	0.58	0.19
CL10518.Contig4_All	22.92	22.07	21.42	17.03	23.79	23.14
CL10519.Contig1_All	2.87	3.43	3.24	0	0.08	0
CL10519.Contig2_All	0.58	0.9	0.99	0.16	0.41	0.12
CL1052.Contig1_All	0	0	0.37	1.42	0.46	1.37
CL10520.Contig3_All	3.25	4.05	3.23	6.83	8.37	7.37
CL10521.Contig1_All	4.29	4.89	4.7	0.25	0.25	0.26
CL10521.Contig2_All	1.36	1.66	2.59	0.48	0.89	1
CL10521.Contig3_All	2.81	2.47	3.61	1.48	0.77	1.81
CL10522.Contig1_All	0	0	0	1.24	0.88	1.75
CL10522.Contig2_All	0.34	0.6	0.54	3.2	3.25	3.72
CL10522.Contig3_All	5.44	6.36	3.97	1.08	0.97	1.14
CL10523.Contig2_All	1.67	1.05	1.14	3.28	3.76	2.85
CL10523.Contig3_All	2.69	4.2	4.41	1.14	1.24	1.12
CL10523.Contig4_All	18.82	18.51	15.17	16.06	15.34	16.39
CL10524.Contig3_All	0	0	0.6	4.88	4.87	3.74
CL10526.Contig2_All	3.96	4.52	5.66	0.32	0.31	0.31
CL10526.Contig3_All	0	0.26	0	1.07	1.89	1.06
CL10527.Contig1_All	66.27	61.52	61.8	484.35	500.57	538.77
CL10527.Contig2_All	155.81	144.87	142.38	391.03	391.2	420.29
CL10528.Contig1_All	7.41	2.84	3.86	1.46	0.49	1.44
CL10529.Contig1_All	1.36	0.98	0.49	0	0.08	0
CL1053.Contig10_All	2.12	1.51	2.02	0	0.04	0.04
CL1053.Contig2_All	0.97	1.22	1.06	0.04	0.18	0.04
CL1053.Contig3_All	11.02	10.28	10.92	11.57	10.34	10.99
CL1053.Contig4_All	1.04	1.09	1.44	0.66	0.33	0.45
CL1053.Contig5_All	0.41	0.84	0.3	4.51	4.27	4.54
CL1053.Contig7_All	0.57	0.28	0.47	0	0.03	0
CL1053.Contig8_All	0.28	0.63	0.51	2.78	3.53	2.48
CL1053.Contig9_All	0.48	0.75	0.55	0	0	0.14
CL10530.Contig2_All	7.87	8.94	8.47	7.98	6.99	7.3
CL10531.Contig1_All	1.87	2.55	3.14	0	0	0
CL10531.Contig2_All	6.27	4.53	5.28	0.09	0	0.17
CL10532.Contig2_All	1.01	1.94	1.84	0.57	0.3	0.57
CL10533.Contig3_All	0.27	0.42	0.14	1.72	1	1.69
CL10534.Contig2_All	3.58	3.19	2.74	0.77	0.5	0.57
CL10535.Contig1_All	0.16	0.17	0.17	3.04	3.89	4.16
CL10536.Contig1_All	1.8	1.69	2.08	5.23	5.01	4.5
CL10536.Contig2_All	4.79	4.14	4.56	3.79	4.26	3.27
CL10537.Contig1_All	3.56	2.96	1.73	0.32	0	0.24
CL10537.Contig2_All	2.71	1.51	2.49	0	0.63	0.18
CL10538.Contig1_All	0	0	0	1.94	1.3	2.14
CL10538.Contig2_All	0.23	1.27	0.48	0	0	0.09
CL10538.Contig3_All	0	0	0.05	0.51	0.53	0.92
CL10539.Contig2_All	0	0	0	0.58	1.45	1.99
CL1054.Contig4_All	1.68	1.81	2.07	0.84	1.38	1.08
CL10540.Contig2_All	7.35	5.57	5.46	22.59	23.82	26.96
CL10540.Contig3_All	10.54	7.93	6.72	0.25	0	0.08
CL10540.Contig4_All	55.74	50.69	58.44	78.69	85.57	88.03
CL10541.Contig4_All	6.67	6.84	6.27	10.49	10.78	10.37
CL10542.Contig2_All	1.06	0.46	0.62	1.94	2.34	3.24
CL10542.Contig3_All	2.64	3.99	3.92	2.02	2.48	3.37
CL10543.Contig2_All	5.4	5.09	5.79	4.01	4.13	3.7
CL10543.Contig3_All	8.65	8.83	8.85	13.72	12.86	13.59
CL10543.Contig4_All	19.06	18.19	18.72	27.57	27.16	27.38
CL10545.Contig1_All	0.42	0.22	0.11	0	0	0
CL10546.Contig1_All	1.02	0.9	0.72	0	0	0
CL10546.Contig2_All	8.59	4.63	5.64	0	0	0
CL10547.Contig2_All	1.76	1.6	1.91	0.43	0.24	0.23
CL10548.Contig2_All	13.77	14.26	16.66	38.55	43.17	47.87
CL10548.Contig3_All	1.18	1.1	0.61	11.7	12.83	17.38
CL10548.Contig4_All	32.87	32.97	32.1	8.34	5.97	9.35
CL10549.Contig2_All	0.91	0.85	1.02	0.09	0	0
CL1055.Contig11_All	0.67	1.3	1.79	3.96	5.5	4.07
CL1055.Contig7_All	7.94	8.59	8.15	0.11	0	0.01
CL1055.Contig8_All	3.03	3.8	4.93	9.23	8.44	8.3
CL1055.Contig9_All	4.74	4.69	4.54	8.22	8.6	7.82
CL10550.Contig1_All	0.06	0.04	0.06	11.37	10.84	10.28
CL10550.Contig2_All	0	0	0	4.44	3.16	8.25
CL10551.Contig1_All	1.03	0.99	0.51	0.29	0.08	0.51
CL10556.Contig1_All	0.99	1.86	1.66	0	0.42	0
CL10557.Contig3_All	0.11	0.5	0.25	1.71	1.87	1.52
CL10558.Contig2_All	5.21	4.52	4.56	0.31	0.16	0.21
CL10559.Contig1_All	2.82	2.17	3.28	8.11	6.73	7
CL10559.Contig2_All	13.07	11.82	12.78	10.65	11.12	11.05
CL1056.Contig2_All	0.8	0.67	0.81	2.48	2.32	2.81
CL10562.Contig1_All	15.77	16.53	16.54	18.35	17.88	16.16
CL10562.Contig2_All	0.29	0.4	0.47	0.83	0.97	1.17
CL10562.Contig3_All	6.62	5.88	5.77	1.66	1.9	1.56
CL10562.Contig4_All	4.4	4.91	4.55	0.64	0.7	0.55
CL10563.Contig1_All	0.22	0.05	0	0.54	0.7	0.57
CL10563.Contig3_All	1.88	3.29	2.7	0.64	0.51	1.15
CL10564.Contig10_All	0.67	0.89	0.86	1.64	1.76	1.33
CL10564.Contig3_All	0.61	0.82	0.54	0	0	0
CL10564.Contig5_All	1.08	0.81	1.16	3.69	2.36	3.57
CL10564.Contig6_All	1.54	1.39	1.09	0.53	0.67	0.86
CL10564.Contig7_All	0.52	0.41	0.3	1.99	1.51	1.07
CL10564.Contig8_All	2.06	2.77	2.81	4.48	4.84	5.04
CL10564.Contig9_All	0.49	0.68	0.95	2.04	3.1	1.44
CL10567.Contig1_All	1.79	1.76	1.81	6.37	6.59	9.29
CL10567.Contig2_All	0.9	0.95	0.82	0	0.14	0.27
CL10567.Contig3_All	0.19	0.62	0.47	1.71	2.44	1.81
CL10568.Contig3_All	0.29	0.35	0.26	0.19	0	0
CL10569.Contig4_All	0.09	0.11	0.11	0.48	0.53	0.26
CL10569.Contig5_All	0.54	0.57	0.31	5.31	5.65	5.64
CL1057.Contig10_All	0.53	0.65	0.76	0.38	0.35	0.36
CL1057.Contig12_All	2.57	2.55	3.27	1.01	1.28	1.02
CL1057.Contig13_All	0.45	0.65	0.68	0.35	0.31	0.43
CL1057.Contig14_All	1.08	0.8	0.85	3.06	2.82	2.6
CL1057.Contig2_All	0.35	0.33	0.48	0	0	0
CL1057.Contig3_All	0.43	0.35	0.24	2.6	2.44	2.64
CL1057.Contig4_All	0.68	0.48	0.32	0	0.01	0
CL1057.Contig5_All	3.18	2.32	2.62	0.8	0.3	1.39
CL1057.Contig7_All	0.37	0.35	0.48	1.18	1.05	0.79
CL1057.Contig8_All	0.51	0.43	0.44	0.07	0.18	0
CL10570.Contig1_All	2.5	2.19	2.66	14.93	17.19	15.55
CL10570.Contig2_All	9.85	10.71	11.73	4.94	5.14	7.57
CL10570.Contig3_All	0.34	0.7	0.88	0	0	0
CL10571.Contig1_All	10.37	10.49	10.76	7.12	9.63	8.38
CL10571.Contig2_All	12.3	13.83	12.66	17.95	18.45	16.95
CL10571.Contig3_All	9.26	9.31	10.02	20.11	20.53	19.08
CL10571.Contig4_All	9.77	12.27	11.39	8.97	11.06	9.92
CL10572.Contig1_All	4.19	3.99	4.47	7.52	6.59	6.32
CL10573.Contig2_All	0.96	0.75	1.43	0.03	0.1	0.05
CL10573.Contig3_All	0	0.21	0	2.86	3.29	3.71
CL10575.Contig1_All	1.33	1.53	1.57	11.26	11.38	11.91
CL10575.Contig3_All	12.32	11.1	10.65	7.49	8.21	7.57
CL10576.Contig2_All	0.14	0.44	0.29	1.4	1.54	1.23
CL10578.Contig1_All	1.75	0.85	0.92	0.16	0.09	0
CL10578.Contig2_All	1.97	2.63	2.24	0.25	0.19	0.02
CL10579.Contig1_All	0.3	0.56	0.44	1.62	1.27	1.22
CL10579.Contig2_All	6.92	5.61	6.74	10.47	8.91	9.9
CL10579.Contig3_All	8.29	9.34	8.69	5.49	6.48	3.45
CL1058.Contig1_All	23.18	24.76	22.9	19.86	21.54	24.08
CL1058.Contig2_All	18.99	15.99	16.83	4.74	4.21	5.14
CL1058.Contig3_All	1.36	1.04	1.2	2.8	2.85	3.23
CL1058.Contig4_All	15.45	15.52	16.33	15.55	15.12	14.24
CL10580.Contig1_All	4.87	3.36	3.41	0	0	0
CL10580.Contig3_All	0.4	1.48	1.07	0	0	0
CL10582.Contig1_All	0.65	1.58	1.24	7.05	6.4	6.46
CL10582.Contig2_All	5.36	6.06	5.63	0.84	1.94	2.06
CL10582.Contig3_All	5.16	3.6	3.45	2.22	1.61	1.42
CL10583.Contig1_All	0.62	0.55	0.37	1.68	2.81	3.86
CL10584.Contig1_All	11.87	10.1	10.09	0	0	0
CL10584.Contig2_All	13.31	12.43	12.47	21.61	21.92	20.14
CL10585.Contig3_All	0	0.15	0	4.18	4.27	3.88
CL10587.Contig1_All	18.42	18.22	18.61	29.92	27.52	25.54
CL10587.Contig2_All	17.08	16.65	18.22	7.59	8.76	8.86
CL10587.Contig3_All	1.01	0.84	0.79	8.05	7.12	8.76
CL10588.Contig1_All	0	0	0	2.26	2.27	0.74
CL10589.Contig3_All	0.89	1.12	0.91	0	0	0
CL1059.Contig1_All	16.99	18.89	17.39	8.22	9.07	8.25
CL1059.Contig2_All	11.38	11.74	11.38	9.29	9.77	9.13
CL10591.Contig1_All	0.41	0.19	0.72	4.57	3.58	4.43
CL10591.Contig2_All	0	0.2	0.14	0.89	1.43	2.03
CL10591.Contig3_All	4.17	3.8	4.66	1.74	2.63	2.71
CL10591.Contig4_All	4.06	3.86	4.11	6.81	7	6.23
CL10592.Contig1_All	1.08	1.11	0.96	3.48	3.54	3.27
CL10592.Contig2_All	5.17	6.83	6.28	5.04	5.42	4.93
CL10594.Contig2_All	4.47	4.18	5.35	11.18	14.89	10.42
CL10594.Contig3_All	6.88	4.34	5.49	3.93	4.11	4.61
CL10595.Contig1_All	10.96	10.14	11.13	9.66	10.62	10.96
CL10595.Contig2_All	8.26	6.95	6.52	2.42	2.74	3.37
CL10595.Contig4_All	0.85	0.78	0.6	1.85	1.75	1.84
CL10595.Contig6_All	1.24	1.68	1.69	1.13	0.78	0.93
CL10596.Contig3_All	3.24	3.27	1.89	1.33	1.12	2.11
CL10596.Contig4_All	0.77	0.86	0.81	9.23	10.36	10.9
CL10598.Contig1_All	0.65	0.67	0.67	0	0.27	0
CL10599.Contig2_All	1.81	2.25	1.13	13.49	13.8	14.36
CL10599.Contig3_All	7.52	8.95	9.02	1.75	1.55	1.63
CL106.Contig10_All	2.01	2.46	2.01	5.6	4.98	3.7
CL106.Contig11_All	3.21	3.22	2.34	7.81	7.84	7.29
CL106.Contig12_All	0	0	0	0.96	0.63	0.47
CL106.Contig13_All	1.21	1.22	1.5	0	0	0.22
CL106.Contig14_All	0.51	0.45	0.41	0	0.15	0
CL106.Contig15_All	3.86	0	2.83	0	0	0
CL106.Contig16_All	0.33	0.6	0.54	0.26	0	0.24
CL106.Contig17_All	0.79	1.07	1.29	0.29	0.15	0.41
CL106.Contig18_All	1.47	1.23	1.28	0	0.12	0
CL106.Contig1_All	2.02	1.67	1.59	5.16	6.53	5.83
CL106.Contig22_All	0	0	0	1.21	2.29	2.18
CL106.Contig23_All	2.06	1.94	1.9	1.72	1.92	1.2
CL106.Contig24_All	1.44	0.52	0.53	0	0	0
CL106.Contig26_All	19.54	18.88	14.31	0.17	3.15	1.59
CL106.Contig27_All	0	0	0	3.21	0.71	2.53
CL106.Contig28_All	2.43	4.16	2.8	0.75	0.64	0.74
CL106.Contig29_All	6.14	5.01	7.97	0.2	0.14	0.75
CL106.Contig32_All	0.19	0.19	0	1.03	0.42	0.93
CL106.Contig33_All	24.06	27.43	24.5	9.14	6.36	6.3
CL106.Contig36_All	6.06	8.05	6.88	16.53	14.16	15.46
CL106.Contig37_All	46.78	58.36	54.77	43.48	46.19	44.52
CL106.Contig5_All	16.05	14.71	14.75	0.09	0.13	0.16
CL106.Contig7_All	3.21	2.88	1.41	8.15	5.21	5.19
CL106.Contig9_All	0.48	0.98	0.56	2.41	2.34	2.44
CL1060.Contig11_All	2.07	2.5	1.97	0	0.05	0
CL1060.Contig12_All	0.32	0.2	0.25	1.63	1.78	2.03
CL1060.Contig13_All	0.1	0.09	0.82	0	0	0
CL1060.Contig14_All	0.26	0.31	0.41	0	0	0.09
CL1060.Contig16_All	1.87	2.1	2.14	1.23	1.69	1.39
CL1060.Contig17_All	20.75	22.6	20.85	16.01	18.22	19.4
CL1060.Contig1_All	2.02	1.5	1.63	0	0	0
CL1060.Contig20_All	0	0	0	1.06	0.46	0.37
CL1060.Contig21_All	0.57	0.38	0.2	1.29	1.28	1.13
CL1060.Contig23_All	1.27	1.16	1.96	0.09	0.17	0.18
CL1060.Contig24_All	0	0.09	0	0.83	0.61	1.22
CL1060.Contig25_All	3.62	4.43	3.51	0	0	0
CL1060.Contig2_All	0.09	0	0.11	1.31	0.68	0.81
CL1060.Contig3_All	0.37	0.29	0.23	0.15	0	0.06
CL1060.Contig4_All	0.58	0.76	0.6	2.12	1.79	2.06
CL1060.Contig6_All	1.3	1.91	1.95	0	0.08	0
CL1060.Contig7_All	1.18	1.35	2.08	13.96	12.73	13.16
CL1060.Contig8_All	2.89	2.36	2.16	0.37	0.85	0.43
CL1060.Contig9_All	0.78	0.96	1	6.95	6.8	7.6
CL10600.Contig1_All	7.22	8.21	5.9	2.03	2.56	2.88
CL10600.Contig3_All	5.21	5.6	5.54	0.81	0.09	0.44
CL10600.Contig4_All	1.63	2.21	2.22	9.38	11.34	11.13
CL10601.Contig1_All	0.79	0.68	0.33	0.24	0.14	0.07
CL10601.Contig3_All	1.64	1.99	2	3.68	4.73	4.03
CL10601.Contig4_All	0.78	0.43	0.46	1.94	2.26	2.19
CL10601.Contig5_All	5.15	6.08	6.79	2.66	2.58	2.53
CL10604.Contig2_All	9.97	10.66	7.92	20.13	19.4	19.31
CL10606.Contig1_All	0.38	0.26	0.4	0	0	0
CL10606.Contig2_All	1.79	2.09	2.69	0	0	0
CL10606.Contig4_All	1.87	1.83	1.61	3.05	5	4.99
CL10606.Contig5_All	3.44	2.57	0.85	0.52	0.52	0.68
CL10608.Contig2_All	0	0	0.97	1.31	3.29	3.23
CL10609.Contig1_All	20.94	20.39	20.25	18.96	20.81	21.53
CL10609.Contig2_All	0.05	0.11	0.05	9.35	9.85	9.9
CL10609.Contig3_All	3.62	3.74	3.29	2.59	2.94	2.72
CL10609.Contig4_All	10.51	8.37	7.44	7.33	8.35	8.36
CL10609.Contig5_All	3.9	4.56	4.34	0.79	0.99	0.82
CL1061.Contig1_All	0.33	0.42	0.41	1.44	1.77	2.13
CL10610.Contig2_All	1.79	1.41	1.98	0.86	0.57	0.71
CL10610.Contig4_All	0.92	1.95	1.54	0	0.2	0.19
CL10613.Contig2_All	2.52	1.62	2.03	0.41	0	0.41
CL10613.Contig3_All	1.62	2.05	2.08	0.05	0	0
CL10613.Contig4_All	2.3	1.87	2.42	0	0	0
CL10613.Contig5_All	0.51	0.35	0.54	2.51	2.18	1.76
CL10614.Contig2_All	1.09	0.78	0.6	2.86	2.37	2.88
CL10614.Contig4_All	3.39	3.28	2.84	1.09	1.89	1.63
CL10615.Contig1_All	53.13	51.99	43.08	47.31	47.99	43.42
CL10615.Contig2_All	61.57	58.9	65.53	66.04	60.68	62.87
CL10615.Contig4_All	5.39	4.88	4.3	10.3	14.49	9.26
CL10616.Contig1_All	0.07	0.11	0	4.22	3.5	4.48
CL10616.Contig2_All	0.08	0	0	2.98	3.79	2.71
CL10616.Contig3_All	0.59	0.69	0.53	2.88	2.35	2.59
CL10616.Contig4_All	0	0	0	2.12	0.99	1.02
CL10617.Contig1_All	1.46	0.51	1.84	0	0	0
CL10617.Contig2_All	10.98	8.54	11.83	3.74	4.72	5.79
CL10617.Contig3_All	4.11	4.35	3.39	0.87	1.61	1.3
CL10617.Contig4_All	1.86	1.4	1.79	8.42	9.02	7.94
CL10618.Contig2_All	1.44	1.11	0.97	0.62	0.54	0.09
CL10619.Contig2_All	0.3	0.62	0.31	1.73	2.36	2.63
CL1062.Contig1_All	0.46	0.51	0.52	1.26	0.94	1.34
CL1062.Contig2_All	6.47	8.55	9.27	9.01	6.52	6.56
CL10621.Contig1_All	0.56	0.58	1.75	4.94	3.37	5.06
CL10621.Contig2_All	4.36	5.37	4.87	8.08	7.78	8.37
CL10621.Contig4_All	2.65	2.49	2.48	0.9	0.86	0.9
CL10623.Contig3_All	0.67	0.67	0.77	0.13	0.16	0.12
CL10624.Contig1_All	14.23	14.24	14.85	3.37	3.24	3.39
CL10624.Contig2_All	3.68	2.85	4.17	6.35	8.13	5.84
CL10625.Contig2_All	0.14	0.08	0	1.49	0.8	0.52
CL10626.Contig1_All	0.88	0.78	0.97	1.95	1.86	2.03
CL10626.Contig2_All	3.5	3.34	4.08	2.41	2.92	3.49
CL10626.Contig3_All	31.74	35.37	34.76	21.99	20.44	19.65
CL10627.Contig1_All	15.93	15.66	14.65	1.24	1.18	1.03
CL10627.Contig2_All	1.51	1.08	1.87	9.14	10.67	10.02
CL10627.Contig3_All	0	0.09	0	0.44	1.46	1.08
CL10628.Contig1_All	1.65	2.06	1.67	4.97	4.82	5.02
CL10628.Contig3_All	3.15	2.95	3.08	8.15	8.71	7.43
CL10628.Contig4_All	4.61	5.82	5.11	8.68	8.7	7.88
CL10628.Contig5_All	0.78	0.72	1.44	0.47	0.36	0.47
CL10628.Contig6_All	0.96	1.34	1.3	2.7	2.71	2.17
CL10629.Contig1_All	1.05	1.46	1.27	0	0	0
CL10629.Contig2_All	2.65	3.26	2.74	0	0	0
CL1063.Contig2_All	1.67	2.76	1.88	1.63	1.35	1.96
CL1063.Contig4_All	3.31	3.67	3.7	2.54	2.1	1.95
CL10630.Contig2_All	2.59	2.42	2.36	1.58	1.44	1.29
CL10632.Contig2_All	3.87	4.5	4.34	1.97	1.81	2.59
CL10633.Contig1_All	0	0	0	0.87	0.7	2.15
CL10633.Contig2_All	0.64	0.42	0.42	3.4	3	3.32
CL10633.Contig3_All	0.99	2.03	2.11	0	0.14	0.14
CL10633.Contig4_All	4.34	5.15	4.45	2.23	2.95	2.13
CL10634.Contig2_All	2.94	2.65	2.72	5.89	8.23	9.36
CL10634.Contig3_All	19.05	21.34	20.27	16.07	16.51	15.11
CL10636.Contig1_All	1.98	1.69	1.87	5.13	4.71	3.47
CL10636.Contig3_All	0.28	0.23	0.38	0.08	0.14	0.09
CL10636.Contig4_All	3.67	3.84	4.16	3.55	3.82	3.45
CL10636.Contig5_All	3.18	2.58	3.25	6.08	5.05	4.97
CL10638.Contig2_All	2.05	2.14	2.8	0.79	0.8	0.73
CL10639.Contig1_All	4.8	4.68	4.47	3.56	3.2	3.86
CL10639.Contig2_All	2.09	1.59	1.71	4.16	4.14	4.28
CL10639.Contig3_All	2.72	2.53	3.08	5.21	6.03	4.36
CL1064.Contig2_All	0.37	0.25	0.27	1.29	1.27	0.8
CL10640.Contig2_All	0.79	2.06	1.57	0	0	0
CL10641.Contig2_All	7.17	6.88	9.65	0	0	0.05
CL10642.Contig1_All	3.48	2.56	2.67	1.14	0.9	0.92
CL10642.Contig2_All	3.19	2.18	2.71	6.56	8.49	5.74
CL10643.Contig1_All	0.24	0.18	0.06	0.56	1.36	0.85
CL10644.Contig2_All	0.77	1.03	1.07	0	0	0
CL10644.Contig4_All	24.38	24.39	20.08	18.23	25.86	22.22
CL10645.Contig1_All	5.95	7.33	5.72	19.86	20.73	20.25
CL10645.Contig2_All	3.93	3.28	3.01	0.42	0.37	0.3
CL10647.Contig1_All	13.47	15.33	14.47	12.48	12.01	14.01
CL10649.Contig3_All	2.15	1.2	0.98	0.25	0	0.12
CL10649.Contig4_All	0.82	0.29	0.28	0	0.25	0.13
CL10649.Contig5_All	0	0	0	1.83	1	1.2
CL1065.Contig3_All	14.73	14.33	15.61	3.09	3.76	3.03
CL1065.Contig4_All	4.89	2.96	3.5	13.14	14.85	14.96
CL1065.Contig5_All	1.37	1.08	0.28	0.37	0.32	0.11
CL1065.Contig6_All	2.37	3.86	3.28	0	0	0
CL1065.Contig7_All	2.18	4.52	2.89	0	0.31	0
CL1065.Contig9_All	1.91	0.91	1.41	4.88	3.75	5.09
CL10650.Contig1_All	3.38	2.79	3	2.23	2.89	2.93
CL10650.Contig2_All	2.22	2.72	2.9	2.4	2.01	2.15
CL10651.Contig1_All	1.04	1.68	2.64	0.63	0.18	0.62
CL10651.Contig2_All	3.19	4.47	6.63	0.8	0.9	0.69
CL10652.Contig1_All	3.96	3.29	3.94	2.83	2.64	1.62
CL10652.Contig2_All	4.69	4.31	4.11	9.21	9.32	9.79
CL10652.Contig3_All	5.17	6.44	6.05	1.56	2.49	1.32
CL10653.Contig2_All	0.33	0.28	0.11	1.57	1.72	0.89
CL10654.Contig1_All	0.8	1.46	0.42	0.21	0	0
CL10655.Contig1_All	4.42	4.62	4.48	1.92	2.1	1.84
CL10656.Contig3_All	2.05	2.27	2.68	1.03	0.59	1.12
CL10656.Contig4_All	1.82	2.45	2.29	1.25	1.02	1.39
CL10657.Contig1_All	1.43	1.86	1.16	9.54	11.44	11.81
CL10658.Contig2_All	0.87	0.55	0.92	2.35	3.1	2.34
CL10659.Contig2_All	0	0	0	0.5	0	0.56
CL10659.Contig3_All	1.41	3.03	1.43	0.96	1.97	0.47
CL1066.Contig2_All	0	0	0	1.18	1.76	1.51
CL10660.Contig1_All	0.33	0	0.1	0.71	0.64	0.95
CL10660.Contig2_All	1.32	1.2	0.71	3.36	2.51	4.02
CL10662.Contig2_All	0.95	0.52	0.86	0.11	0.11	0.05
CL10665.Contig1_All	1.04	0.37	1.13	0	0	0
CL10665.Contig2_All	0.59	0.57	0.56	0.27	0	0
CL10665.Contig4_All	2.64	2.52	2.86	1.43	1.84	1.44
CL10666.Contig2_All	1.02	1.5	1.29	4.81	5.26	2.58
CL10667.Contig1_All	0.17	0.3	0.45	2.54	3.31	2.96
CL10667.Contig3_All	3.74	5.34	3.61	2.44	2.58	2.24
CL10668.Contig1_All	0	0	0	1	0.85	1.81
CL10668.Contig2_All	2.98	2.62	3.49	0.49	1.03	0.89
CL1067.Contig10_All	0	0	0.35	2.33	1.29	1.54
CL1067.Contig3_All	0.73	0.6	0.72	6.98	4.45	5.48
CL1067.Contig4_All	0.5	0.78	0.47	1.3	1.38	2
CL1067.Contig6_All	3.27	2.93	2.87	0	0	0
CL1067.Contig7_All	1.72	1.74	1.69	0.98	0.89	1.14
CL1067.Contig8_All	0.87	0.83	0.68	0.12	0.14	0.13
CL10671.Contig1_All	0.82	1.65	0.8	0	0	0
CL10671.Contig2_All	1.89	0.71	0.27	0	0	0
CL10672.Contig3_All	54.69	60.31	63.8	0.83	0.23	0.56
CL10672.Contig4_All	93.21	101.94	95.46	273.68	288.77	324.45
CL10673.Contig1_All	0.9	0.89	0.81	2.44	2.06	2.52
CL10673.Contig2_All	0.88	0.95	1.02	0	0	0
CL10673.Contig3_All	2	1.3	1.12	0.92	0.86	0.81
CL10673.Contig4_All	1.1	1.09	0.89	0	0.2	0
CL10673.Contig5_All	0.98	1.01	1.06	5.23	5.22	4.89
CL10674.Contig2_All	2.28	2.37	1.68	1.45	1.66	1.55
CL10674.Contig3_All	1.42	3.16	3.31	0.39	0.13	0.09
CL10674.Contig4_All	6.21	5.31	5.09	10.51	9.04	9.41
CL10675.Contig1_All	13.48	13.06	11.71	0.35	0	0.12
CL10675.Contig2_All	15.15	16.83	15.23	15.46	14.44	14.79
CL10675.Contig4_All	3.24	4.3	3.48	44.24	38.66	43.4
CL10675.Contig5_All	29.05	30.27	27.07	0.23	0.35	0.24
CL10676.Contig1_All	0.5	0.62	0.21	1.46	1.67	1.95
CL10676.Contig2_All	0.58	0.83	0.95	1.81	2.77	2.38
CL10678.Contig2_All	1.02	1.06	1.16	0.43	0.64	0.11
CL10678.Contig3_All	1.85	1.18	1.12	0.23	0.62	0.28
CL10679.Contig1_All	19.48	18.59	16.93	12.05	13.55	12.04
CL10679.Contig2_All	16.18	15.11	15.25	23.07	22.6	23.48
CL1068.Contig2_All	0.25	0.49	0	3.32	3.46	1.65
CL1068.Contig4_All	0	0	0	3.17	2.68	2.03
CL1068.Contig5_All	1.68	2.17	3.33	8.29	7.15	8.71
CL1068.Contig6_All	7.42	8.29	7.35	2.26	2.07	2
CL10680.Contig2_All	12.45	11.17	12.1	5.46	6.84	6.15
CL10680.Contig3_All	1.52	1.49	1.46	2.99	2.59	2.79
CL10682.Contig1_All	3.06	3.07	2.45	0.17	0.09	0.23
CL10682.Contig2_All	3.59	4.3	5.13	10.1	8.96	9.54
CL10684.Contig2_All	1.68	2.3	2.25	4.87	4.55	4.55
CL10684.Contig4_All	3.73	3.98	3.95	1.99	2.55	2.82
CL10688.Contig1_All	0.17	0.29	0.09	1.32	1.73	2.49
CL10688.Contig2_All	0	0	0.16	6.62	8.42	6.59
CL1069.Contig1_All	4.45	3.8	4.46	7.89	8.68	7.16
CL1069.Contig2_All	1.12	1.68	0.99	18.45	18.13	17.52
CL1069.Contig3_All	7.47	8.35	7.18	8.54	7.88	7.16
CL1069.Contig4_All	8.94	8.73	9.25	9.05	9.86	8.38
CL1069.Contig5_All	21.15	20.97	23.14	12.49	12.11	10.64
CL10690.Contig1_All	0.82	0.65	1.61	0	0	0
CL10690.Contig2_All	4.81	3.85	4.02	0.46	0.73	0.36
CL10691.Contig1_All	1.52	2.68	3.42	0	0	0
CL10691.Contig2_All	2.68	3.08	1.77	0	0	0
CL10691.Contig3_All	8.73	6.81	8.17	0	0	0
CL10691.Contig4_All	4.59	4.24	5.08	10.75	11.09	12.64
CL10693.Contig1_All	1.2	1.64	1.66	3.53	3.57	3.25
CL10694.Contig1_All	3.52	2.86	2.66	7.11	7.15	5.49
CL10695.Contig2_All	8.03	9.96	9.68	6.2	4.88	5.48
CL10696.Contig1_All	0	0	0	4.09	4.6	3.14
CL10697.Contig1_All	1	1.04	1.75	2.5	3.18	2.17
CL10699.Contig1_All	0.43	0.27	0.88	0	0	0
CL107.Contig10_All	184.42	172.6	174.35	20.05	19.35	19.05
CL107.Contig11_All	118.48	132.46	115.87	331.61	323.83	336.47
CL107.Contig12_All	925.95	973.94	1016.1	841.66	841.25	863.13
CL107.Contig13_All	9.55	11.69	11.86	17.04	21.13	20.37
CL107.Contig14_All	2.31	2.38	1.96	84.56	89.47	84.56
CL107.Contig15_All	331.01	341.06	315.66	503.03	498.15	502.56
CL107.Contig16_All	23.82	25.4	24.23	35.69	39.66	36.41
CL107.Contig17_All	46.33	47.89	49.69	75.33	73.34	75.04
CL107.Contig18_All	3.18	3.24	2.18	181.46	174.07	184.07
CL107.Contig19_All	195.1	200.99	205.83	120.99	114.98	115.86
CL107.Contig20_All	4.52	5.11	5.15	13.9	11.62	12.44
CL107.Contig21_All	13	14.36	14.02	36.51	39.42	36.47
CL107.Contig22_All	70.21	68.84	72.38	134.59	125.26	128.92
CL107.Contig23_All	60.12	59.61	51.92	8.08	8.23	6.83
CL107.Contig24_All	38.48	41.49	41.75	113.9	112.16	108.31
CL107.Contig26_All	4.56	4.48	5.41	28.96	25.38	27.16
CL107.Contig27_All	7.71	7.79	8.71	6.03	6.04	5.31
CL107.Contig28_All	4.41	4.32	5.76	1.96	1.88	1.67
CL107.Contig29_All	3.99	3.46	4.07	31.66	30.84	31.95
CL107.Contig2_All	616.14	632.95	693.78	7.84	9.86	6.71
CL107.Contig3_All	452.7	455.6	445.55	165.66	147.73	169.47
CL107.Contig4_All	122.93	121.62	127.72	260.12	256.85	252.82
CL107.Contig6_All	173.99	173.86	171.13	163.66	167.31	166.54
CL107.Contig7_All	49.49	48.89	44.24	65.21	75.79	73.26
CL107.Contig8_All	41.24	35.24	34.78	22.16	21.09	22.25
CL107.Contig9_All	0.18	0.11	0.19	55.63	71.94	63.28
CL10700.Contig1_All	2.23	1.28	3	12.1	10.85	11.11
CL10700.Contig2_All	3.16	3.69	4.65	1.18	1.32	0.8
CL10702.Contig1_All	0.08	0	0.09	4.88	4.6	5.32
CL10703.Contig1_All	0.27	0.31	0.34	2.35	1.75	2.53
CL10704.Contig1_All	1.63	2.71	2.71	0.52	0.34	0.51
CL10705.Contig1_All	0.72	0.53	0.93	3.37	2.42	1.4
CL10706.Contig3_All	99.16	100.18	92.01	90.86	82.99	88.58
CL10707.Contig1_All	6.03	5.7	5.98	0	0	0
CL10707.Contig2_All	0.49	0.77	0.67	0	0	0
CL10707.Contig3_All	0.85	0.53	0.27	0	0	0
CL10707.Contig4_All	0.92	0.64	1.12	0	0	0
CL10708.Contig1_All	10.62	7.48	9.41	2.22	1.51	2.3
CL10708.Contig2_All	0.5	1.16	0.78	9.05	7.22	8.27
CL10709.Contig1_All	3.26	3.57	1.73	0.99	1.19	1.38
CL10709.Contig2_All	10.46	9.84	12.95	5.43	2.41	3.47
CL1071.Contig1_All	9.32	8.65	8.66	1.63	1.07	0.8
CL1071.Contig2_All	0.19	0.27	0.11	0.59	0.49	0.57
CL1071.Contig3_All	1.61	1.55	0.99	0.44	0.34	0.2
CL1071.Contig9_All	1.98	1.95	2.81	10.66	11.36	11.72
CL10710.Contig3_All	1.69	1.54	1.89	3.14	2.76	2.51
CL10712.Contig1_All	1.75	1.78	1.6	3.61	4.42	3.83
CL10712.Contig3_All	3.41	3.9	3.18	3.51	3.09	2.92
CL10713.Contig1_All	15.49	16.18	15.29	2.11	3.22	2.81
CL10713.Contig2_All	0.51	0.77	0.4	13.93	15.58	15.9
CL10715.Contig1_All	3	3.88	3.26	0.13	0	0.07
CL10715.Contig2_All	2.95	3.09	2.68	6.67	7.5	7.03
CL10716.Contig1_All	0.96	0.62	0.62	0.13	0	0
CL10717.Contig2_All	2.46	2.82	2.75	2.25	1.77	1.88
CL10718.Contig1_All	5.13	6.26	5.42	2.02	1.37	1.08
CL10718.Contig2_All	4.49	2.98	3.31	1.21	0.92	0.6
CL1072.Contig2_All	1.96	1.36	1.74	0	0	0
CL1072.Contig3_All	0.97	1.04	0.85	3.3	4.32	3.8
CL1072.Contig4_All	0.39	0.45	0.33	6.28	6.33	5.39
CL1072.Contig5_All	2.84	2.57	2.24	0.38	0.89	1.11
CL1072.Contig6_All	2.09	1.49	1.51	0	0	0
CL10721.Contig11_All	0.42	0.27	0.26	0.84	1.06	0.72
CL10721.Contig13_All	0.49	0	0.21	0	0	0
CL10721.Contig15_All	3.46	2.96	2.76	0.05	0.08	0.06
CL10721.Contig16_All	8.71	9.79	9.22	0	0	0.05
CL10721.Contig17_All	0.43	0.84	0.94	0	0	0
CL10721.Contig18_All	1.24	0.95	1.44	0.21	0.11	0.06
CL10721.Contig19_All	4.02	3.05	4.44	0	0	0.11
CL10721.Contig21_All	0.18	0.18	0.08	0.64	0.8	0.74
CL10721.Contig22_All	0.47	0.2	0.34	0.07	0.05	0
CL10721.Contig23_All	5.42	3.85	4.51	0.08	0.08	0.08
CL10721.Contig25_All	0.94	1.11	0.99	0	0	0
CL10721.Contig27_All	0	0	0	1.06	0.34	1.04
CL10721.Contig29_All	0.15	0.07	0.21	0.03	0	0
CL10721.Contig30_All	1.42	1.35	1.07	0.12	0.18	0.17
CL10721.Contig32_All	1.03	0.67	0.98	0.31	0.14	0.38
CL10721.Contig33_All	0.39	0.28	0.41	0	0	0.09
CL10721.Contig35_All	0.26	0.23	0.13	0.52	1.09	0.99
CL10721.Contig36_All	0	0	0	3.08	4.74	1.65
CL10721.Contig38_All	0	0	0	1.88	1.65	4.16
CL10721.Contig39_All	0	0	0	0.58	0	0.28
CL10721.Contig40_All	0	0	0	1.09	0.36	1.85
CL10721.Contig42_All	0.64	0.46	0.64	1.88	2.11	1.19
CL10721.Contig44_All	0	0	0	1.4	2.49	4.41
CL10721.Contig45_All	0.25	0.36	0.62	0.08	0.09	0.06
CL10721.Contig47_All	3.19	2.74	3.71	1.37	1.29	1.29
CL10721.Contig48_All	0	0.05	0.04	0.75	1.22	0.68
CL10721.Contig49_All	0.25	0.93	1.03	0.12	0.06	0
CL10721.Contig6_All	1.66	1.94	2.36	0.14	0.09	0.14
[truncated: 81,501 more rows]

## Sheet: E2 vs L2
Gene ID	E2_r1 FPKM	E2_r2 FPKM	E2_r3 FPKM	L2_r1 FPKM	L2_r2 FPKM	L2_r3 FPKM
CL1.Contig1_All	0.1	0.19	0	3.88	3.18	2.75
CL1.Contig2_All	0.59	0.4	0.72	0.79	1.12	1.1
CL1.Contig3_All	0.63	0.74	0.6	0.23	0.29	0.26
CL10.Contig1_All	0	0	0	4.71	7.23	6.91
CL10.Contig2_All	1.23	2.12	1.36	3.03	2.03	3.46
CL10.Contig3_All	18.05	19.18	20.02	6.31	5.33	7.22
CL10.Contig4_All	20.62	20.87	24.28	1.78	1.84	1.72
CL100.Contig3_All	2.42	2.4	2.11	2.88	3.48	4.31
CL100.Contig4_All	2.62	2.09	2.45	4.29	3.98	3.33
CL100.Contig5_All	1.37	1.22	0.95	0.11	0.31	0.11
CL1000.Contig3_All	1.86	1.82	1.55	5.43	5.14	5.3
CL1000.Contig4_All	2.53	1.76	2.67	4.39	4.54	4.53
CL1000.Contig5_All	2.79	2.26	2.64	4.72	4.94	4.79
CL10000.Contig1_All	0.68	0.69	0.69	0	0	0
CL10000.Contig2_All	3.88	4.69	4.1	1.83	2.32	2.27
CL10001.Contig1_All	0.93	1.2	1.16	3.26	3.55	2.57
CL10001.Contig2_All	1.37	1.45	0.84	5.93	6.33	6.95
CL10001.Contig3_All	0.38	0.36	0.45	1.25	0.87	0.67
CL10001.Contig5_All	4.62	4.21	4.23	6.86	7.53	5.26
CL10001.Contig7_All	0.49	0.1	0	1.58	1.68	3.78
CL10001.Contig8_All	0	0.33	0	2.2	2.42	1.5
CL10002.Contig2_All	1.81	1.63	1.71	0.88	1.28	0.97
CL10002.Contig3_All	1.13	1.42	0.96	2.66	2.59	2.37
CL10003.Contig2_All	34.18	34.45	39.56	41.75	43.51	46.91
CL10004.Contig2_All	3.82	3.4	3.47	1.59	1.37	1.89
CL10004.Contig3_All	0.26	0.29	0.36	1.21	1.08	1.21
CL10005.Contig2_All	5.65	5.25	5.88	0.79	0.54	1.02
CL10006.Contig3_All	2.84	3.14	2.56	1.21	0.77	0.79
CL10007.Contig2_All	1.59	0.87	1.37	3.16	1.69	2.19
CL10008.Contig1_All	0	0.17	0.29	1.6	1.86	1.41
CL10008.Contig2_All	2.02	1.64	1.75	0.64	0.37	1.37
CL10008.Contig3_All	7.39	8.86	7.93	3.62	4.15	3.61
CL1001.Contig10_All	5.53	6.13	5.52	10.93	8.18	7.76
CL1001.Contig11_All	2.52	2.61	2.55	1.24	0.73	1.01
CL1001.Contig12_All	0.16	0.26	0.03	7.94	7.89	7.82
CL1001.Contig13_All	0.11	0.26	0.2	3.81	3.9	4.06
CL1001.Contig15_All	8.86	8.08	9.22	1.79	2.46	1.65
CL1001.Contig17_All	1.79	1.34	1.62	4.83	4.4	4.85
CL1001.Contig18_All	3.62	3.6	3.44	2.82	2.71	2.36
CL1001.Contig19_All	10.12	12.59	11.38	6.4	6.04	6.44
CL1001.Contig1_All	0.02	0.05	0.05	0.52	0.35	0.53
CL1001.Contig20_All	0.19	0.06	0.14	0.73	0.99	0.81
CL1001.Contig21_All	5.99	5.44	5.45	2.17	3.03	2.55
CL1001.Contig22_All	20.46	21.18	21.97	17.27	18.6	18.76
CL1001.Contig23_All	0.75	0.59	0.47	0.24	0.23	0.23
CL1001.Contig24_All	24.06	22.89	23.04	2.25	2.27	1.71
CL1001.Contig25_All	25.72	23.51	22.67	0	0	0
CL1001.Contig26_All	1	1.06	1.18	2.3	3.89	2.55
CL1001.Contig27_All	5.69	5.38	3.53	7.57	8.72	7.64
CL1001.Contig28_All	49.41	48.85	52.11	106.22	103.97	105.86
CL1001.Contig29_All	0	0.2	0.09	5.53	3.64	4.73
CL1001.Contig2_All	7.93	8.36	7.27	2.47	2.39	2.44
CL1001.Contig3_All	7.23	7.76	8.06	9.45	9.74	9.2
CL1001.Contig4_All	7.3	9.61	6.67	4.43	5.25	4.11
CL1001.Contig5_All	1.59	1.54	1.41	4.14	4.34	4.18
CL1001.Contig6_All	9.56	11.16	10.32	2.85	2.69	2.5
CL1001.Contig7_All	1.37	0.62	1.18	0	0	0
CL1001.Contig8_All	8.72	8.15	7.04	11.37	11.6	9.29
CL1001.Contig9_All	4.94	4.7	4.98	1.77	1.62	2.14
CL10010.Contig1_All	9.65	8.3	8.18	4.89	4.71	5.84
CL10010.Contig2_All	74.6	70.33	56.08	35.92	40.49	32.5
CL10010.Contig3_All	1.33	1.81	2.41	0.71	0.33	0.59
CL10010.Contig5_All	30.3	28.66	29.28	18.28	18.05	17.37
CL10010.Contig6_All	13.31	12.89	13.33	16.51	17.37	15.77
CL10010.Contig7_All	1.99	0.99	0.6	0.04	0	0
CL10011.Contig1_All	19.53	17.13	19.3	27.5	33.07	33.95
CL10011.Contig2_All	34	33.43	32.9	28.7	28.85	31.29
CL10012.Contig1_All	0.33	0.83	0.64	2.39	2.09	2.23
CL10012.Contig2_All	2.1	2.22	1.48	1.21	0.83	0.65
CL10013.Contig1_All	1.05	0.95	0.94	0.03	0.27	0.49
CL10013.Contig2_All	4.39	5.18	4.51	1.81	1.57	1.43
CL10013.Contig3_All	0.72	0.46	0.45	0	0	0
CL10013.Contig4_All	2.48	1.52	1.78	5.89	5.41	4.88
CL10013.Contig6_All	1.4	1.16	1.48	0.24	0	0
CL10013.Contig7_All	5.18	4.84	4.86	0	0	0
CL10013.Contig8_All	0	0	0	0.9	1.91	2.1
CL10013.Contig9_All	7.04	7.29	8.12	9.96	8.89	10.56
CL10014.Contig1_All	1.93	1.88	1.28	0.77	0.62	0.49
CL10015.Contig1_All	1.86	1.93	2.13	0.14	0.07	0.45
CL10015.Contig2_All	0.53	0.4	0.26	2.73	1.53	2.64
CL10015.Contig4_All	2.4	2.08	2.03	3.71	4.13	4.06
CL10016.Contig1_All	1.74	1.62	1.31	0.27	0.27	0
CL10016.Contig2_All	13.22	14.7	12.21	10.68	10.63	10.68
CL10016.Contig3_All	3.74	2.99	3.47	9.5	11.1	11.23
CL10018.Contig1_All	0.09	0	0.19	6.89	6.82	4.69
CL10018.Contig2_All	0.45	0.92	0.99	0	0	0
CL10019.Contig3_All	0.86	0.56	0.84	2.52	3.03	2.4
CL10019.Contig4_All	4.45	5.27	4.23	1.63	1.43	2.16
CL1002.Contig1_All	17.09	15.96	18.96	0.28	0.34	0.37
CL1002.Contig2_All	0	0	0	4.22	2.79	3.35
CL1002.Contig3_All	26.55	25.07	27.7	4.05	4.95	4.86
CL1002.Contig4_All	99.92	98.55	97.65	36.46	30.99	34.09
CL1002.Contig5_All	10.63	11.27	12.64	123.76	130.46	133.3
CL10021.Contig10_All	6.21	7.15	6.74	0	0	0
CL10021.Contig11_All	81.52	90.81	87.96	0.22	0.21	0.16
CL10021.Contig12_All	2.11	1.75	3.33	0.28	0.1	0.38
CL10021.Contig13_All	56.85	55.99	55.99	0.12	0.12	0.21
CL10021.Contig14_All	0.07	0.05	0.04	11.85	14.13	11.69
CL10021.Contig15_All	9.15	8.79	6.91	0	0.11	0.06
CL10021.Contig16_All	15.42	15.4	15.58	1.77	2.38	1.95
CL10021.Contig18_All	2.76	2.21	2.17	0	0	0
CL10021.Contig19_All	4.58	4.33	4.48	15.03	17.01	14.17
CL10021.Contig1_All	0.23	0.49	0.28	0	0.05	0.11
CL10021.Contig24_All	67.53	68.71	70.59	47.53	45.7	46.52
CL10021.Contig25_All	191.75	190.99	195.94	13.8	12.64	12.94
CL10021.Contig26_All	22.22	22.35	23.7	8.42	9.48	9.25
CL10021.Contig27_All	2.75	2.46	2.16	0	0	0
CL10021.Contig2_All	0	0	0	0.59	0.28	0.47
CL10021.Contig3_All	0	0	0	1.74	2.64	1.24
CL10021.Contig5_All	0	0	0	11.32	12.96	14.62
CL10021.Contig6_All	30.77	28.03	26.54	0.24	0	0
CL10021.Contig7_All	0.86	1.62	1.54	0	0	0.11
CL10021.Contig8_All	32.53	29.41	31.67	0.04	0.03	0
CL10021.Contig9_All	0	0	0	0.95	0.65	0.67
CL10022.Contig3_All	1.41	0.9	0.77	0	0.09	0
CL10022.Contig4_All	0.31	0.45	0.39	0.2	0.11	0.11
CL10022.Contig5_All	3.08	3.2	2.79	0.03	0	0
CL10023.Contig2_All	8.35	7.06	7.73	5.38	5.56	6.52
CL10024.Contig1_All	1.07	1.31	0.52	4	2.21	1.39
CL10025.Contig1_All	0.51	0.83	0.51	2.48	2.41	3.14
CL10026.Contig1_All	1.93	1.56	2.08	8.31	9.69	8.73
CL10026.Contig2_All	4.44	4.61	4.45	8.16	7.56	7.76
CL10026.Contig3_All	5.86	5.99	6.16	1.3	2.27	1.55
CL10026.Contig5_All	0.95	0.32	0	3.5	3.95	2.59
CL10027.Contig2_All	3.28	3.07	1.83	1.64	1.44	1.77
CL10028.Contig1_All	0.97	1.03	0.85	4.07	4.31	4.3
CL10028.Contig2_All	2.06	1.96	1.73	2.25	3.37	4.64
CL10029.Contig2_All	7.37	7.76	7.57	4.53	4.49	4.21
CL1003.Contig1_All	24.49	23.35	24.11	7.19	6.34	8.84
CL1003.Contig2_All	75.06	78.76	78.58	88.98	105.5	108.44
CL1003.Contig3_All	41.88	45.57	42.7	15.6	18.87	19.96
CL10030.Contig2_All	7.39	6.01	6.08	8.18	9.71	8.66
CL10031.Contig1_All	0.48	0.16	0.42	1.93	1.72	1.93
CL10033.Contig1_All	6.98	6.68	6.62	10.01	10.29	9.97
CL10033.Contig3_All	12.68	12.52	13.12	7.67	7.28	6.53
CL10036.Contig1_All	0	0	0	4.88	5.96	7.24
CL10036.Contig2_All	6.29	6.21	5.14	0.66	1.09	0.95
CL10036.Contig3_All	5.03	3.98	4.36	32.98	35.51	35.95
CL10036.Contig4_All	21.72	20.39	21.79	0.47	0.67	0.48
CL10037.Contig12_All	1.78	1.26	1.22	0.31	0.82	0.97
CL10037.Contig13_All	0.08	0.19	0.1	0.67	1.19	1.1
CL10037.Contig15_All	0	0	0	0.59	0.77	0.25
CL10037.Contig16_All	0	0	0	2.83	2.8	3.14
CL10037.Contig18_All	1.47	0.63	1.08	0.12	0	0.12
CL10037.Contig19_All	0	0	0	0.2	0.31	0.27
CL10037.Contig20_All	0.24	0.23	0.29	0	0	0.08
CL10037.Contig21_All	0	0	0	0.3	0.45	0.15
CL10037.Contig22_All	0.14	0	0	5.43	5.21	4.88
CL10037.Contig23_All	0.6	0.54	0.42	0	0	0
CL10037.Contig24_All	0.22	0.21	0.32	0	0	0
CL10037.Contig25_All	3.03	3.73	3.47	1.07	1.43	0.87
CL10037.Contig26_All	0.95	0.7	0.91	0.41	0.55	0.32
CL10037.Contig27_All	0.45	0.64	1	2.01	3.22	2.69
CL10037.Contig28_All	0	0	0	0.15	0.17	0.16
CL10037.Contig33_All	0	0	0	0.1	0.39	0
CL10037.Contig35_All	0.72	0.61	0.47	2.53	3.17	3.22
CL10037.Contig36_All	0.68	0.7	0.46	0.06	0.22	0.26
CL10037.Contig39_All	0	0	0	0.57	0.37	0
CL10037.Contig41_All	0.85	0.3	0.78	0.37	0.19	0.14
CL10037.Contig42_All	0.37	0.15	0.19	1.69	2.92	3.16
CL10037.Contig43_All	1.61	1.96	1.61	4	3.58	3.17
CL10037.Contig7_All	0.3	0.11	0.2	0	0	0
CL10037.Contig8_All	1.92	1.09	1.49	3.43	2.36	2.12
CL10037.Contig9_All	0	0.04	0	0.85	0.69	0.99
CL10038.Contig1_All	1.29	1.29	1.37	3.68	4.05	4.42
CL10038.Contig2_All	1.83	1.38	1.62	0.22	0.14	0.25
CL10038.Contig3_All	3.97	3.17	2.78	0.2	0.28	0.19
CL1004.Contig1_All	0.12	0.13	0.21	0.62	0.66	0.67
CL1004.Contig3_All	1.41	0.69	1.01	3.91	3.58	2.99
CL1004.Contig4_All	1.4	1.53	1.58	1.11	1.04	1.07
CL1004.Contig5_All	4.24	3.73	3.25	5.09	5.29	5.19
CL1004.Contig6_All	2.31	2.27	1.65	0.15	0.05	0.09
CL1004.Contig7_All	0.05	0	0	0.06	0.2	0.13
CL1004.Contig8_All	0.41	0.36	0.45	0.04	0.03	0
CL10040.Contig4_All	1.57	1.64	1.34	3.46	2.77	2.59
CL10041.Contig1_All	2.24	2.11	1.75	0.47	1.09	0.32
CL10042.Contig3_All	1.17	1.49	1.75	2.83	3.3	2.72
CL10043.Contig11_All	1.25	0.99	0.96	0	0	0
CL10043.Contig12_All	1.5	1.45	1.55	0.23	0.04	0.08
CL10043.Contig13_All	0.27	0.27	0.16	0	0	0
CL10043.Contig14_All	3.35	3.05	2.81	1.01	0.83	0.38
CL10043.Contig16_All	0.98	0.71	0.94	0.66	0.43	0.48
CL10043.Contig17_All	1.48	1.27	2.04	0.1	0.11	0.07
CL10043.Contig18_All	0	0.06	0.1	0	0	0
CL10043.Contig19_All	0.35	0.53	0.45	3.94	4.32	3.64
CL10043.Contig1_All	0.15	0.03	0.11	0.3	0.26	0.22
CL10043.Contig21_All	0.19	0.33	0.43	0.94	0.68	1.08
CL10043.Contig23_All	0.15	0	0	0.32	0.32	0.36
CL10043.Contig24_All	2.96	2.4	2.67	0.47	0.71	0.89
CL10043.Contig26_All	2.27	2.81	1.92	0.97	1.34	1.12
CL10043.Contig29_All	1.86	2.08	2.22	0.68	1.72	0.82
CL10043.Contig2_All	0.71	0.82	0.38	0.21	0.18	0.11
CL10043.Contig30_All	2.09	2.86	2.88	5	5.36	4.57
CL10043.Contig31_All	0.46	0.39	1.04	0.02	0	0.27
CL10043.Contig32_All	7.52	5.99	7.28	12.74	12.32	11.5
CL10043.Contig35_All	2.08	1.35	1.43	4.33	3.9	5.03
CL10043.Contig3_All	1.15	0.82	0.74	0.08	0	0.12
CL10043.Contig4_All	1.48	1.46	1.02	4.19	4.56	4.76
CL10043.Contig5_All	0.03	0.03	0	0.61	0.66	0.73
CL10043.Contig6_All	0.11	0.48	0.27	0.04	0	0
CL10043.Contig7_All	1.01	1.39	1.28	6.67	5.6	7.2
CL10043.Contig8_All	0.35	0.05	0.18	1.07	1.58	1.37
CL10043.Contig9_All	0.69	0.94	1.07	2.09	1.77	1.74
CL10044.Contig1_All	1.49	1.88	1.12	0.42	0.33	0.52
CL10044.Contig2_All	3.04	2.89	3.12	0.34	0.42	0.24
CL10044.Contig4_All	0.64	0.41	0.58	1.4	1.22	1.52
CL10045.Contig2_All	1.75	1.12	1.94	0	0	0.07
CL10045.Contig3_All	19.93	22.87	20.1	32.71	32.73	35.21
CL10046.Contig1_All	1.27	1.34	1.7	7.77	10.1	8.61
CL10046.Contig2_All	5.34	3.79	4.56	1.26	1.4	1.97
CL10047.Contig2_All	2.53	2.79	2.86	4.41	4.92	4.41
CL10047.Contig3_All	2.68	2.62	2.72	3.54	3.63	3.53
CL10048.Contig1_All	0.09	0.13	0.09	0	0	0
CL10048.Contig2_All	0.04	0.14	0.06	1.81	1.96	1.41
CL10048.Contig3_All	3.39	3.41	5.03	0.66	0.54	1.27
CL10048.Contig4_All	0.93	1.01	0.92	0.33	0.3	0.18
CL10048.Contig5_All	0.07	0.12	0	0.72	0.28	0.3
CL10049.Contig3_All	1.49	1.35	1.37	0.66	0.72	1.06
CL10049.Contig5_All	1.3	1.08	0.95	2.07	2.03	1.77
CL1005.Contig3_All	2.82	0.48	1.63	0	0	0
CL10050.Contig4_All	1.62	1.96	1.39	0.89	0.49	0.48
CL10050.Contig5_All	6.62	5.91	7.5	14.2	15.01	13.17
CL10050.Contig6_All	4.56	4.21	4.77	9.62	8.92	8.44
CL10051.Contig1_All	0.66	0.8	0.85	0	0.01	0
CL10051.Contig2_All	1.12	1.09	1.05	0	0	0
CL10051.Contig3_All	0.55	1.02	0.66	0	0	0
CL10051.Contig4_All	2.38	1.92	2.09	0	0.03	0
CL10051.Contig5_All	3.24	2.81	3.05	7.97	7.55	8.03
CL10051.Contig6_All	4.79	4.79	3.84	8.8	8.8	8.45
CL10052.Contig1_All	0.84	1.43	1.4	0.83	0.44	0.25
CL10052.Contig3_All	5.06	5.36	6.64	0.56	0.28	0.47
CL10052.Contig4_All	27.78	26.74	28.07	36.72	34.14	36.87
CL10052.Contig5_All	12.47	10.2	11.31	5.13	7.36	5.53
CL10053.Contig1_All	3.98	2.77	3.91	0	0	0
CL10053.Contig2_All	4.55	5.25	4.6	6.27	6.23	6.07
CL10055.Contig1_All	2.95	3.02	4.6	0.34	0	0
CL10055.Contig2_All	6.8	6.51	6.71	0.22	0.11	0.22
CL10056.Contig3_All	4.01	5.73	5.25	0	0	0
CL10056.Contig4_All	0.53	1.8	0.52	5.11	4.86	5.7
CL10056.Contig6_All	0.13	0.22	0.17	0	0	0
CL10056.Contig7_All	0	0	0	0.69	2.06	0.35
CL10057.Contig1_All	2.84	2.93	3.28	0.41	0.37	0.93
CL10057.Contig2_All	2	2.09	1.6	4.13	4.65	4.5
CL10058.Contig1_All	0.85	1.76	1.01	0.35	0.31	0.13
CL10058.Contig3_All	0.15	0	0	1.4	1.66	1.96
CL1006.Contig2_All	2.75	2.38	2.36	1.51	1.5	1.41
CL10061.Contig1_All	0.74	1.01	1.56	3.63	2.43	3.05
CL10062.Contig1_All	6.74	8.32	7.48	11.78	12.65	14.74
CL10062.Contig2_All	14.99	15.3	14.88	7.74	10.53	9.2
CL10063.Contig1_All	5.12	3.16	4.23	25.93	23.41	23.13
CL10063.Contig2_All	9.08	7.38	5.78	0	0	0
CL10063.Contig3_All	14.1	14.56	16.74	2.87	4.65	3.81
CL10063.Contig4_All	14.92	14.28	16.56	6.46	9.59	8.91
CL10064.Contig2_All	5.23	4.85	5.01	6	6.94	6.92
CL10064.Contig3_All	0.07	0	0	6.48	4.54	4.71
CL10064.Contig4_All	12.02	11.07	11.62	4.62	5.42	5.04
CL10065.Contig3_All	3.08	2.24	2.46	3.58	3.77	4.2
CL10066.Contig1_All	15.25	13.18	13.14	42.13	43.98	43.71
CL10066.Contig2_All	15.63	16.62	14.47	74	73.88	68.04
CL10067.Contig1_All	0.03	0.1	0.11	0.52	0.73	0.23
CL10067.Contig2_All	0.48	0.95	0.34	1.57	1.18	1.17
CL10068.Contig3_All	3.38	3.07	3.23	1.68	1.68	1.81
CL1007.Contig3_All	0.64	0.56	0.2	3.5	2.55	3.25
CL1007.Contig4_All	4.94	4.11	4.75	1	1.05	1.92
CL1007.Contig5_All	0.99	0.89	1.11	0	0.21	0.32
CL10071.Contig1_All	0.58	0.85	1.52	3.51	3.86	2.97
CL10071.Contig2_All	2.28	1.8	2.26	0.44	0.85	1.21
CL10072.Contig2_All	1.96	2.54	2.08	5.5	5.62	5.52
CL10072.Contig3_All	6.89	6.53	6.11	4.36	3.73	3.6
CL10072.Contig4_All	0.6	0.76	0.71	1.08	1.45	1.25
CL10072.Contig5_All	0.88	0.89	1.04	1.91	2.24	2.28
CL10072.Contig6_All	0.98	0.89	1.7	2.63	2.82	3.11
CL10073.Contig1_All	1.99	1.82	0.68	0	0	0
CL10074.Contig2_All	0	0	0	0.77	0.51	2.35
CL10075.Contig1_All	2.29	2.61	3.1	5.65	6.16	6.08
CL10075.Contig2_All	10.69	10.33	8.7	14.78	13.83	12.53
CL10076.Contig1_All	0.3	0.3	0.15	3.53	4.37	5.52
CL10077.Contig1_All	1.8	2.12	1.6	1.52	1.13	1.07
CL10078.Contig1_All	2.92	2.58	3.07	0.13	0.07	0
CL10078.Contig2_All	1.28	2.59	1.01	0	0	0
CL10078.Contig3_All	0	0	0.1	13.13	13.08	12.89
CL10078.Contig4_All	3.31	3.67	3.85	7.22	7.74	7.52
CL10078.Contig6_All	17.06	16.94	15.15	4.23	3.75	4.38
CL10078.Contig8_All	4.01	3.69	4.03	0.02	0.07	0.03
CL10079.Contig1_All	3.05	3	1.97	0.35	0.4	0.25
CL10079.Contig2_All	0	0.56	0.1	5.09	5.25	4.66
CL10079.Contig3_All	5.74	6.05	6.06	3.08	2.85	4.64
CL10079.Contig4_All	2.58	2.57	3.37	3.87	4.76	4.87
CL10081.Contig2_All	1.1	1.96	1.1	0	0	0
CL10082.Contig3_All	12.61	10.74	8.17	0.13	0.15	0
CL10082.Contig5_All	1.96	1.65	2.29	10.38	13.01	12.25
CL10083.Contig1_All	3.32	4.01	3.84	1.98	2.43	2.41
CL10083.Contig2_All	1.09	1.21	1.55	0	0	0.06
CL10083.Contig3_All	8.35	7.26	8.83	11.15	12.61	12.39
CL10083.Contig4_All	1.96	1.66	2.02	0.08	0	0.16
CL10083.Contig5_All	0.89	0.53	0.72	0.17	0.07	0.09
CL10083.Contig6_All	0.5	0.97	1.16	0.11	0.1	0
CL10084.Contig1_All	7.53	6.28	6.99	0	0	0.05
CL10087.Contig1_All	0.65	0.27	0.92	0	0	0
CL10087.Contig2_All	0.66	0.92	0.83	0.18	0	0.26
CL10087.Contig3_All	8.35	6.58	7.48	3.35	3.17	3.01
CL10089.Contig1_All	3.56	2.23	4.03	0.09	0.34	0.17
CL1009.Contig1_All	0.84	1.64	1.08	2.87	2.42	3
CL1009.Contig2_All	1.94	0.7	2.21	0	0	0
CL1009.Contig5_All	0.97	0.56	0.63	0.16	0.36	0.25
CL10090.Contig1_All	0.06	0.28	0.28	3.31	4.15	3.19
CL10090.Contig2_All	6.9	5.44	6.51	12.59	12.65	13.93
CL10090.Contig3_All	7.21	5.48	6.55	9.65	7.08	9.46
CL10090.Contig4_All	11.65	13.06	13.42	23.17	24.32	25.07
CL10090.Contig5_All	10.98	11.47	11.88	7.37	6.95	7.46
CL10090.Contig6_All	2.48	2.79	3.26	0.42	0.51	0.36
CL10092.Contig1_All	1.23	0.6	0.72	0	0.18	0
CL10092.Contig5_All	2.64	3.53	2.75	0.89	0.79	1.25
CL10092.Contig7_All	0.72	1.01	0.55	0	0.08	0
CL10093.Contig2_All	1.3	1.75	1.66	0.77	0.49	0.5
CL10094.Contig2_All	33.08	33.68	33.76	41.72	42.66	39.52
CL10095.Contig1_All	3.3	2.32	3.78	0	0.34	0.34
CL10095.Contig3_All	46.86	50.33	47.02	55.67	52.93	52.62
CL10096.Contig1_All	0	0	0	2.47	2.1	3.56
CL10096.Contig2_All	0.81	2.88	2.02	0	0	0
CL10096.Contig4_All	3.02	3.57	3.46	5.58	4.87	4.88
CL10097.Contig1_All	8.71	7.1	7.39	0.85	1	0.17
CL10097.Contig5_All	22.09	20.89	22.2	19.56	18.32	18.42
CL10098.Contig3_All	5.08	6.37	6.8	19.09	19.29	20.3
CL10098.Contig4_All	0.59	1.15	0.58	2.25	2.6	2.9
CL10099.Contig2_All	20.35	18.85	18.21	13.37	14.44	13.3
CL10099.Contig3_All	6.24	6.51	5.95	1.23	1.75	2.05
CL10099.Contig4_All	7.6	8.86	7.98	12.35	12.91	11.59
CL101.Contig2_All	0.84	0.3	0.82	0.07	0	0.04
CL101.Contig3_All	2.33	1.87	2.42	3.07	2.98	3.22
CL101.Contig4_All	1.46	2.15	1.25	3.05	2.51	2.82
CL1010.Contig1_All	0	0.43	0	0.99	0.75	0.69
CL1010.Contig5_All	2.46	2.47	2.47	3.75	3.6	3.45
CL1010.Contig9_All	2.59	2.31	2.47	1.32	1.18	1.23
CL10101.Contig1_All	0.48	0	0.48	1.81	2.82	1.44
CL10103.Contig2_All	1.89	2.71	3.07	0.78	0.48	0.49
CL10104.Contig2_All	0.72	0.57	0.62	0.25	0.27	0.22
CL10104.Contig3_All	0.7	1.06	0.99	2.87	3.34	3.37
CL10106.Contig4_All	1.11	0.96	0.73	0.14	0.17	0.45
CL10107.Contig4_All	0.4	0.61	0.67	5.91	4.73	6.25
CL10107.Contig6_All	2.34	2.1	2.64	4.7	5.31	5.18
CL10108.Contig2_All	0.45	0.53	0	0.87	1.09	1.18
CL10108.Contig4_All	0.51	0	0.19	6.97	5.37	6.64
CL10108.Contig7_All	1.75	1.18	1.59	0.79	0.73	0.92
CL10108.Contig9_All	1.68	3.29	2.26	3.27	6.14	4.69
CL10109.Contig1_All	4.28	3.97	3.18	0.04	0.04	0
CL1011.Contig11_All	30.32	34.44	32.44	49.54	50.71	54.75
CL1011.Contig1_All	9.17	8.27	8.02	0	0	0
CL1011.Contig4_All	0.9	0.31	0.95	3.34	3.6	2.58
CL1011.Contig5_All	24.23	21.36	23.47	17.77	18.54	20.56
CL1011.Contig6_All	95	96.47	93.54	88.53	88.54	88.35
CL1011.Contig9_All	0	0	0	51.01	48.53	54.92
CL10111.Contig11_All	2.18	1.48	1.12	0.19	0.09	0.09
CL10111.Contig13_All	0.91	1.04	1.44	0.59	0.5	0.23
CL10111.Contig1_All	0	0	0	1.02	0.68	0.84
CL10111.Contig3_All	2.69	3.28	2.48	1	1.15	1.19
CL10111.Contig5_All	0.68	1.16	0.94	0.56	0.55	0.43
CL10111.Contig6_All	0	0	0	0.54	0.85	0.76
CL10111.Contig7_All	0.58	0	0	1.52	1.04	1.09
CL10111.Contig8_All	0	0	0	3.26	2.57	3.24
CL10111.Contig9_All	0.12	0.05	0.18	0.73	1.26	1.37
CL10112.Contig1_All	0	0	0	2.18	1.91	1.97
CL10112.Contig2_All	3.02	2.59	3.24	0.36	0	0.22
CL10113.Contig1_All	0.59	0.5	0.99	0.24	0.19	0.13
CL10113.Contig5_All	0.53	0	1.14	0	0	0
CL10114.Contig1_All	2.38	4.13	3.08	8.35	6.14	6.88
CL10114.Contig2_All	5.98	4.84	2.87	2.29	1.31	1.69
CL10114.Contig3_All	0.9	1.19	1.21	0	0	0
CL10116.Contig2_All	40.37	41.34	36.83	47.93	55.36	50.76
CL10116.Contig3_All	26.16	25.66	24.44	31.46	33.79	33.54
CL10117.Contig1_All	0	0	0	0.52	1.16	0.59
CL10117.Contig5_All	7.02	6.44	6.93	9.65	9.46	9.62
CL10118.Contig2_All	1.19	0.91	1.34	0	0	0
CL10118.Contig3_All	0.48	0.82	0.81	1.9	2.28	2.31
CL10118.Contig4_All	10.24	10.48	10.07	5.88	5.75	5.39
CL10119.Contig3_All	4.35	4.38	3.48	6.21	8.45	6.18
CL1012.Contig2_All	0.54	0.55	0.88	0	0.05	0
CL1012.Contig3_All	0.66	0.55	0.6	0	0	0
CL1012.Contig5_All	7.59	7.45	6.61	0	0	0
CL10120.Contig1_All	3.62	3.77	2.82	0.9	0.14	0.48
CL10121.Contig2_All	1.51	1.84	1.51	0.3	0.1	0.3
CL10123.Contig5_All	0.57	0.8	0.4	1.31	1	1.53
CL10124.Contig1_All	9.22	9.13	8.53	6.7	6.49	6.71
CL10125.Contig1_All	0.48	0.49	0.16	1.73	2.5	2.08
CL10125.Contig3_All	0	0	0	2.03	1.51	1.8
CL10126.Contig2_All	3.86	3.33	3.7	0.72	0.99	0.97
CL10126.Contig3_All	3.11	4.33	2.8	1.4	1.39	1.12
CL10127.Contig1_All	1.41	1.97	1.05	5.95	5.44	6.35
CL10127.Contig3_All	1.22	1.28	0.77	2.51	2.04	2.23
CL10127.Contig5_All	4.69	4.51	5.08	1.84	1.67	1.11
CL10128.Contig2_All	0	0	0.04	0.95	1.87	1.32
CL10128.Contig3_All	0	0.09	0	3.45	3.02	3.38
CL10129.Contig1_All	0.07	0	0.47	10.39	8.03	9.17
CL10129.Contig2_All	0.17	0	0	8.11	9.62	7.53
CL1013.Contig1_All	0.98	0.76	0	0	0	0
CL1013.Contig3_All	4.67	3.03	3.36	13.66	15.42	14.09
CL1013.Contig6_All	0.66	0.89	0.61	0	0	0
CL1013.Contig7_All	26.38	27.16	29.03	14.57	15.76	16.24
CL10130.Contig1_All	8.49	10.42	7.52	26.11	26.31	26.16
CL10130.Contig2_All	19.18	15.39	17.43	1.43	1.35	1.57
CL10130.Contig4_All	8.71	10.15	9.1	13.58	12.32	12.12
CL10130.Contig5_All	0.8	1.13	1.28	7.84	6.78	7.08
CL10130.Contig6_All	6.12	6.28	6.77	4.44	4.16	3.81
CL10131.Contig1_All	7.07	8.49	7.46	43.88	46.89	50.07
CL10131.Contig2_All	8.35	6.91	7.99	3.9	4.8	3.77
CL10131.Contig3_All	13.58	13.36	13.62	10.43	11.58	11.55
CL10131.Contig5_All	23.83	28.64	25.59	17.05	15.41	17.14
CL10132.Contig1_All	28.77	24.99	28.03	15.99	16.16	20.05
CL10132.Contig3_All	8.29	7.85	8.89	0.87	0.63	0.24
CL10132.Contig4_All	23.8	20.25	23.61	36.31	35.71	40.92
CL10132.Contig5_All	25.09	24.11	26.66	19.55	19.7	19.75
CL10134.Contig1_All	10.42	7.43	11.84	0.79	1.22	0
CL10134.Contig2_All	2.36	3.07	1.26	5.72	5.89	6.96
CL10134.Contig3_All	21.68	19.73	22.02	17.13	19.43	15.87
CL10134.Contig4_All	3.06	2.96	4.77	23.78	22.59	24.2
CL10134.Contig5_All	29.53	27.88	30.06	4.08	5.34	4.95
CL10137.Contig1_All	1.63	1.55	1.03	0.46	0.69	0.66
CL10137.Contig2_All	2.43	2.4	1.7	6.43	7.02	5.43
CL10137.Contig3_All	1.57	1.87	2.76	9.86	9.15	9.18
CL10137.Contig4_All	3.76	3.56	3.04	8.6	10.7	9.33
CL10137.Contig5_All	4.32	5.48	5.08	7.44	7.78	7.69
CL10137.Contig6_All	3.57	2.7	2.62	6.83	7.5	7.65
CL10138.Contig1_All	0	0.14	0.54	2.8	4.09	3.79
CL10138.Contig3_All	0	0.81	0.2	2.54	2.72	1.59
CL10139.Contig1_All	18.04	13.7	16.16	7.44	9.85	10.67
CL10139.Contig2_All	9.72	13.5	12.41	15.84	16.03	17.48
CL1014.Contig1_All	1.1	0.59	0.41	0.21	0	0.14
CL1014.Contig2_All	6.13	6.07	4.7	2.56	2.3	2.55
CL1014.Contig3_All	3.22	3.21	3.36	8.81	8.89	9.02
CL1014.Contig4_All	2.37	2.78	2.57	0	0.05	0
CL1014.Contig5_All	0.55	0.86	0.74	3.69	3.8	3.77
CL1014.Contig6_All	1.59	1.4	1.6	0.97	1.21	0.72
CL10141.Contig3_All	4	3.67	5.03	7.04	7.75	7.87
CL10142.Contig2_All	0.26	0.26	0.32	1.4	1.71	1.18
CL10142.Contig3_All	5.5	4.97	4.56	1.56	1.84	1.51
CL10142.Contig4_All	2.17	2.93	3.62	9.47	9.48	10.7
CL10143.Contig2_All	2.33	2.16	1.82	0.89	0.39	0.3
CL10144.Contig3_All	2.32	2.49	2.91	1.01	1.03	0.74
CL10145.Contig2_All	1.12	0.68	0.49	1.54	1.65	2.14
CL10146.Contig1_All	0.93	0.93	0.78	0.45	0.13	0.32
CL10146.Contig2_All	5.07	5.23	5.43	0	0	0
CL10146.Contig3_All	1.21	1.47	0.88	0.67	0.55	0.6
CL10147.Contig2_All	4.95	6.96	5.47	0.52	1.23	0.69
CL10148.Contig1_All	1.84	1.96	2.46	10.97	9.53	9.62
CL10148.Contig2_All	6.64	6.56	6.17	1.71	2.44	1.82
CL10149.Contig1_All	3.6	4.19	3.49	1.43	1.87	0.9
CL10149.Contig3_All	5.65	5.59	6.54	47.44	54.52	51.08
CL10149.Contig4_All	1.16	1.05	0.94	7.21	8.6	7.85
CL10149.Contig5_All	6.32	6.76	5.72	11.68	12.11	13.5
CL10149.Contig6_All	46.27	43.25	42.2	0	0	0.09
CL1015.Contig11_All	0	0	0	2.62	1.49	1.52
CL1015.Contig5_All	0.43	0.43	1.05	4.81	5.38	6.78
CL1015.Contig7_All	3.23	3.28	2.93	1.06	0.53	0.27
CL10150.Contig1_All	1.07	0.82	0.71	3.88	3.42	3.67
CL10150.Contig2_All	7.47	9.38	7.21	13.12	14.43	12.03
CL10150.Contig3_All	4.05	3	3.4	9.31	9.47	11.25
CL10150.Contig4_All	7.65	3.63	7.52	0	0	0
CL10150.Contig5_All	8.59	13.4	9.8	18.51	17.94	17.91
CL10150.Contig6_All	14.39	13.03	13.49	3.5	4.04	3.75
CL10151.Contig1_All	0.54	0.62	0.47	0.13	0.06	0.07
CL10151.Contig2_All	2.92	2.93	2.96	6.51	6.05	6.27
CL10151.Contig3_All	0	0	0	0.54	2.2	1.19
CL10151.Contig4_All	1.01	0.38	0.86	0	0	0
CL10151.Contig8_All	2.38	3.5	3.19	0.42	0.26	0.85
CL10152.Contig1_All	1.75	0.91	0.76	9.41	10.48	11.98
CL10152.Contig2_All	14.06	15.76	11.05	15.24	19.56	18.44
CL10152.Contig3_All	1.77	3.95	2.67	6.6	5.08	5.17
CL10152.Contig4_All	23.37	26.5	25.38	33.75	33.09	33.46
CL10153.Contig3_All	2.07	1.66	2.56	4.19	7.09	7.87
CL10153.Contig4_All	0	0	0	1.36	1.58	1.74
CL10154.Contig2_All	2.36	2.56	1.22	9.27	10.59	8.76
CL10154.Contig3_All	0.1	0.1	0.15	2.08	2.15	3.11
CL10155.Contig2_All	2.73	2.63	1.77	0.43	0.79	0.38
CL10156.Contig2_All	0.84	1.1	0.61	1.87	1.98	2.4
CL10156.Contig4_All	0.79	0.97	0.78	0.5	0.3	0.42
CL10156.Contig5_All	10.92	9.09	8.48	1.56	2.64	2.16
CL10157.Contig1_All	2.22	3.21	2.05	0.16	0.31	0.32
CL10157.Contig4_All	3.21	3.36	1.9	0.42	0.43	0.1
CL10158.Contig1_All	82.39	80.46	74.78	32.16	31.51	33.09
CL10158.Contig2_All	40.17	40.51	37.54	115.35	121.2	120.18
CL10158.Contig3_All	22.52	24.54	21.3	28.98	29.09	30.97
CL1016.Contig2_All	4.51	4.93	3.19	0.3	0	0.52
CL1016.Contig3_All	3.12	3.18	4.13	0.26	1	0
CL10160.Contig1_All	7.3	8.02	8.36	4.03	3.36	3.36
CL10160.Contig2_All	1.61	1.41	1.38	4.46	4.25	5.33
CL10160.Contig3_All	2.23	2.41	1.46	11.84	11.69	12.42
CL10161.Contig5_All	3.76	5.8	5.93	0	0	0
CL10163.Contig1_All	1.76	0.75	1.74	5.46	5.36	5.41
CL10163.Contig2_All	3.39	2.84	2.17	1.27	1.58	0.91
CL10163.Contig3_All	0.55	0.36	0.7	0	0	0
CL10163.Contig4_All	0	0	0	0.62	1.82	0.6
CL10164.Contig1_All	5.97	6.09	6.21	19.82	18.41	17.67
CL10164.Contig2_All	2.51	2.68	2.93	3.99	3.32	3.91
CL10164.Contig3_All	1.94	1.86	1.48	6.24	5.92	5.17
CL10164.Contig5_All	2.15	1.42	1.96	3.57	2.77	2.81
CL10164.Contig6_All	1.9	2.08	1.56	8.24	7.09	8.2
CL10165.Contig1_All	8.41	8.97	8.79	11.94	13.26	11.21
CL10165.Contig2_All	5.48	5.97	5.77	2.32	2.2	2.35
CL10167.Contig2_All	1.25	1.2	1.02	3.64	2.66	2.92
CL10169.Contig1_All	4.77	4.28	4.74	1.86	0.54	1.23
CL10169.Contig2_All	1.07	0.96	0.79	4.2	2.97	2.99
CL10169.Contig3_All	6.11	7.18	6.96	0.88	3.13	2.1
CL1017.Contig2_All	0.14	0	0	1.78	0.95	1.12
CL1017.Contig3_All	1.13	1.77	2.21	1.01	1.21	0.39
CL1017.Contig4_All	6.75	5	5.15	1.85	1.53	2.67
CL1017.Contig5_All	0	0	0	0.8	0.85	0.99
CL1017.Contig6_All	3.91	3.66	4.38	0	0	0
CL10170.Contig2_All	3.97	3.37	3.22	1.32	1.3	1.61
CL10171.Contig2_All	13.46	13.39	13.11	11.74	10.65	10.73
CL10172.Contig2_All	0.05	0.03	0	0.14	0.35	0.34
CL10172.Contig3_All	1.78	1.68	2.46	6.69	7.37	7.11
CL10172.Contig4_All	5.5	5.69	4.68	0.16	0.45	0.58
CL10173.Contig1_All	40.38	32.65	33.91	0.47	0.47	0
CL10173.Contig3_All	57.3	54.88	52.19	24.87	33.67	32.54
CL10174.Contig2_All	7.79	9.05	8.67	0.53	0.42	0.82
CL10174.Contig3_All	40.01	39.98	39.02	68.92	65.8	64.1
CL10174.Contig5_All	1.72	1.46	2.1	4.25	4.97	5.71
CL10174.Contig6_All	3.95	3.57	4.85	21.39	20.5	16.7
CL10176.Contig1_All	0	0	0	1.99	0.99	1
CL10178.Contig2_All	3.76	3.55	3.31	1.85	1.44	1.89
CL10179.Contig2_All	17.62	17.43	16.64	14.04	14.33	14.47
CL1018.Contig11_All	3.53	4.16	4.24	8.89	10.69	9.99
CL1018.Contig1_All	4.14	2.98	3.22	0.32	0.84	0.65
CL1018.Contig2_All	2.87	2.7	3.22	0	0.04	0.04
CL1018.Contig4_All	1.25	1.22	0.71	0	0.07	0
CL1018.Contig5_All	1.53	1.27	1.17	0.04	0	0
CL1018.Contig7_All	1.47	1.54	1.26	9.82	10.58	10.9
CL1018.Contig8_All	1.63	1.8	2.17	0.03	0	0.06
CL1018.Contig9_All	1.8	1.36	0.93	0.62	0.6	0.47
CL10181.Contig1_All	6.3	7.26	6.57	13.5	12.52	13.94
CL10181.Contig2_All	6.03	5.97	6.99	4.49	4.64	4.24
CL10182.Contig2_All	3.1	2.9	2.75	1.78	1.56	1.7
CL10182.Contig3_All	5.06	6.75	5.82	9.12	9.25	9.65
CL10182.Contig6_All	4.18	5.32	4.43	7.5	8.68	9.07
CL10185.Contig2_All	0	0	0	0.93	0.92	1.25
CL10186.Contig1_All	7.21	6.79	6.25	12.34	12.7	12.39
CL10187.Contig1_All	1.37	1.27	1.31	3.03	2.51	2.69
CL10187.Contig2_All	4.15	5.03	4.98	3.54	3.45	2.88
CL10188.Contig2_All	2.06	1.54	2.3	0.88	0.37	0.38
CL10189.Contig2_All	1.17	1.82	1.33	3.49	2.55	3.02
CL1019.Contig2_All	0.7	0.32	0.5	4.74	5.56	4.03
CL1019.Contig3_All	2.66	1.42	2.36	7.56	5.29	6.3
CL10191.Contig1_All	0.66	0.21	0.19	1.6	1.98	1.3
CL10192.Contig1_All	2.87	2.98	2.59	0.63	0.51	0.88
CL10192.Contig2_All	4.43	5.13	4.89	1.19	1.44	1.27
CL10192.Contig3_All	2.99	2.47	2.39	5.57	6.19	5.92
CL10193.Contig1_All	0	0	0	20.2	23.74	20.89
CL10193.Contig2_All	42.17	41.59	46.25	29.06	33.18	26.64
CL10193.Contig3_All	19.06	19	16.89	21.07	21.61	25.08
CL10195.Contig1_All	0	0	0.14	3.28	3.81	2.75
CL10196.Contig2_All	3.16	2.86	3.07	11.87	11.09	12.07
CL10196.Contig4_All	3.25	3.17	3.03	1.61	1.67	1.66
CL10196.Contig5_All	5.82	6.54	6.4	1.31	1.03	0.92
CL10196.Contig6_All	18.24	15.85	16.67	13.74	13.68	12.77
CL10197.Contig3_All	0.23	0.11	0.4	0	0	0
CL10197.Contig4_All	13.69	10.53	9.02	4.76	6.95	7.16
CL10199.Contig1_All	0.61	0.38	0.41	2.99	1.96	2.65
CL10199.Contig2_All	2.32	1.72	1.58	2.55	3.68	3.18
CL102.Contig11_All	82.88	81.64	92.68	0	0	0
CL102.Contig12_All	98.06	97.9	99.75	0.17	0.31	0.18
CL102.Contig13_All	3.86	3.35	2.65	257.49	270.93	262.81
CL102.Contig14_All	0.56	0.24	0.48	28.05	30.23	25.74
CL102.Contig15_All	0.96	0.63	1.38	0	0	0
CL102.Contig1_All	9.23	9.5	11.03	0	0	0.1
CL102.Contig2_All	8.33	9.16	11.28	1.54	0.84	0.83
CL102.Contig3_All	18.7	22.66	19.14	0.2	0	0
CL102.Contig4_All	129.14	124.86	134.96	1.46	2.55	1.46
CL102.Contig5_All	11.2	7.97	8.55	0.47	0.85	0.41
CL102.Contig7_All	52.75	50.97	48.88	0.34	0.17	0.26
CL102.Contig8_All	64.38	63.38	68	122.56	131.58	130.43
CL102.Contig9_All	22.54	18.19	16.69	0	0	0
CL1020.Contig11_All	0.4	0.82	0.53	0.3	0.11	0.09
CL1020.Contig13_All	0	0	0	9.2	10.75	9.03
CL1020.Contig15_All	10.95	10.64	10.83	0	0	0
CL1020.Contig1_All	11.34	10.52	10.71	0.59	0.23	0.24
CL1020.Contig2_All	0	0	0	5	7.02	5.74
CL1020.Contig3_All	0	0	0	11.04	9.99	10.39
CL1020.Contig6_All	0.86	0.79	0.76	0.31	0	0.34
CL10201.Contig1_All	1.08	1.82	1.41	7.84	12.04	11.18
CL10202.Contig1_All	0.5	0.42	0.53	2.91	2.13	2.4
CL10202.Contig2_All	2.05	1.68	1.68	1.55	1.16	0.97
CL10202.Contig4_All	0	0	0.48	2.31	1.65	1.69
CL10203.Contig1_All	0.23	0.36	0.12	17.97	21.02	23.32
CL10203.Contig2_All	0.56	0.64	0.16	1.1	1.01	2
CL10203.Contig3_All	0.82	0.64	1.18	15.26	19.73	17.97
CL10204.Contig1_All	0.91	0.23	0.33	0	0	0
CL10204.Contig2_All	3.69	4.47	3.56	2.73	1.78	1.71
CL10204.Contig3_All	6.36	6.35	5.73	3.25	3.49	3.16
CL10204.Contig4_All	0.04	0.11	0.17	5.42	5.63	5.1
CL10204.Contig5_All	2.16	2.43	2.84	6.84	6.69	7.26
CL10205.Contig1_All	12.38	10.04	12.53	0.02	0.01	0.22
CL10205.Contig2_All	10.35	8.36	9.47	14.4	16.54	16.21
CL10206.Contig2_All	0.27	0.78	0.97	1.84	2.07	1.65
CL10208.Contig1_All	0.41	1.33	3.14	0	0	0
CL10208.Contig3_All	3.35	5.56	4.2	1.33	2.27	1.93
CL10209.Contig1_All	6.89	7.43	7.31	0.23	0.38	0.43
CL10209.Contig2_All	2.79	4.46	4.83	11.57	10.31	11.2
CL10209.Contig3_All	5.38	5.03	5.82	3.2	3.58	4.07
CL1021.Contig2_All	1.57	1.2	1.44	0.07	0.09	0.05
CL1021.Contig3_All	12.72	11.72	10.92	0.62	0.25	0.58
CL10210.Contig1_All	43.81	41.14	37.32	55.21	56.1	52.15
CL10210.Contig2_All	53.84	53.64	53.63	32.99	34.9	35.29
CL10210.Contig3_All	147.15	149	151.86	117.53	122.73	114.97
CL10212.Contig1_All	3.2	3.18	2.9	1.2	1.08	1.43
CL10212.Contig3_All	13.89	13.04	13.61	11.86	8.63	9.7
CL10213.Contig2_All	4.27	2.73	2.45	0.44	0.22	1.8
CL10214.Contig2_All	1.31	1.38	1.96	2.67	2.09	2.24
CL10214.Contig3_All	2.8	2.36	2.69	1.01	1.4	1.37
CL10216.Contig10_All	0.27	0.08	0.04	3.56	2.93	4
CL10216.Contig12_All	0.06	0.04	0.13	1.24	1.26	1.17
CL10216.Contig13_All	0.72	0.58	0.72	0.17	0.12	0.19
CL10216.Contig14_All	0.59	0.7	0.76	5.48	4.41	5.48
CL10216.Contig18_All	0.14	0.28	0.18	3.65	3.62	4.1
CL10216.Contig20_All	0.31	0.51	0.46	58.62	59.98	60.2
CL10216.Contig21_All	0.17	0.12	0.12	3.48	4.4	4.15
CL10216.Contig23_All	0	0	0.05	0.14	0.28	0.09
CL10216.Contig26_All	0	0	0	4.58	4.2	3.21
CL10216.Contig3_All	0.15	0.21	0.45	0	0	0.05
CL10216.Contig4_All	1.03	1.2	1.19	0	0	0
CL10216.Contig5_All	0.4	0.7	0.26	7.37	6.73	6.3
CL10216.Contig6_All	0.08	0.07	0.02	1.36	1.4	1.27
CL10216.Contig7_All	1.26	1.43	1.02	2.06	1.87	1.56
CL10216.Contig8_All	0.95	0.68	1.09	5.56	5.15	4.8
CL10216.Contig9_All	0.13	0	0.17	3.1	3.64	0.81
CL10218.Contig2_All	36.4	37.16	34.81	43.16	54.08	49.32
CL10219.Contig1_All	0.82	0.53	0.45	0.15	0.07	0
CL1022.Contig2_All	2.82	6.42	5.59	11.73	13.33	12.89
CL1022.Contig4_All	11.01	11.51	11.63	14	16.77	17.33
CL1022.Contig5_All	25.58	27.19	27.97	10	6.2	11.93
CL1022.Contig6_All	39.14	41.27	39.53	69.06	67.39	76.81
CL10220.Contig14_All	0.29	0	0.13	1.05	0.84	0.97
CL10220.Contig15_All	0.58	0.09	0.23	2.78	4.17	3.8
CL10220.Contig1_All	0.98	0	0.76	0	0	0
CL10220.Contig2_All	1.63	1.78	2.59	0.47	0	0
CL10220.Contig9_All	3.54	2.18	1.72	0.57	0.3	0.37
CL10221.Contig2_All	11.18	10.35	11.63	1.56	1.42	2.85
CL10221.Contig3_All	20.23	22.25	21.9	26.62	26.23	24.79
CL10221.Contig4_All	6.06	7.56	6.79	0.91	0.85	1.1
CL10222.Contig2_All	0.08	0	0.04	2.24	1.96	1.96
CL10222.Contig3_All	8.7	8.48	7.55	3.96	4.24	4.4
CL10222.Contig4_All	4.86	4	4.35	2.06	2.35	1.93
CL10222.Contig5_All	0.38	0.68	0.56	0.2	0.37	0.16
CL10223.Contig1_All	1.16	1.98	2	6.27	5.68	3.88
CL10223.Contig2_All	2.78	2.98	3.11	0.82	0.89	0.7
CL10223.Contig3_All	3.38	2.79	2.79	0.65	0.38	0.23
CL10223.Contig5_All	0.84	0.58	1.09	3.64	3.41	3.46
CL10223.Contig6_All	3.87	3.36	3.12	2.16	2.3	2.82
CL10223.Contig7_All	0.56	0.43	0.65	1.71	2.54	2.03
CL10224.Contig1_All	5.66	4.64	5.16	6.97	6.77	7.13
CL10225.Contig1_All	1.5	0.41	1.07	11.84	12.3	10.47
CL10225.Contig2_All	15.9	17.02	15.01	8.19	7.36	7.76
CL10225.Contig3_All	6.47	7.3	7.15	13.24	13.23	16.37
CL10227.Contig2_All	2.14	1.54	2.48	0.23	0.46	0.4
CL10229.Contig2_All	1.8	2.95	2.85	9.72	8.25	8.39
CL10229.Contig3_All	3.48	2.82	2.84	5.18	4.48	3.57
CL10229.Contig4_All	2.5	3.01	3.1	0.56	0.19	0.58
CL10229.Contig5_All	6.03	5.11	5.04	6.5	6.19	7.72
CL10229.Contig6_All	4.1	3.72	3.42	11.68	12.24	13.28
CL1023.Contig1_All	0	0.2	0	0.96	0.95	1.36
CL10230.Contig1_All	0.26	0	0	1.06	2.1	0.81
CL10230.Contig2_All	2.12	1.82	1.36	2.84	3.16	2.51
CL10230.Contig4_All	1.32	0.7	1.72	3.92	3.16	2.67
CL10230.Contig5_All	4.2	4.39	4.53	7.62	9.42	8.82
CL10230.Contig6_All	2.9	2.13	1.44	7.82	8.31	7.6
CL10233.Contig1_All	35.44	34.77	31.17	15.09	16.18	12.83
CL10233.Contig2_All	0.08	0	0.21	15.66	16.62	19.29
CL10233.Contig3_All	3.69	3.99	3.3	12.53	13.97	14.02
CL10235.Contig1_All	3.47	2.36	3.04	0.6	0.45	1.55
CL10235.Contig2_All	2.49	2.93	2.56	0.86	1.04	0.83
CL10238.Contig1_All	0	0	0	4.43	7.2	4.07
CL10238.Contig2_All	3.36	2.79	3.62	0.91	0.9	0
CL10239.Contig2_All	4.42	4.23	4.52	5.61	6.49	6.7
CL1024.Contig1_All	0.26	0.33	0.54	0.84	0.72	1.12
CL1024.Contig3_All	3.75	3.38	3.09	0	0.07	0
CL1024.Contig4_All	3.38	2.81	2.77	0.38	0.08	0.28
CL1024.Contig6_All	0	0	0	0	0.62	0.36
CL1024.Contig7_All	1.3	2.52	2.8	0.37	0.78	0.6
CL1024.Contig8_All	0.97	0.89	0.89	4.14	3.37	4.97
CL10240.Contig1_All	0.22	0.33	0.11	2.04	2.02	2.39
CL10241.Contig1_All	2.73	3.7	3.72	21.37	19.03	18.96
CL10242.Contig2_All	0.27	0.18	0.73	2.29	1.85	1.82
CL10243.Contig1_All	0	0	0	1.55	1.79	1.83
CL10247.Contig1_All	1.59	0.6	1.13	0	0	0.53
CL10247.Contig2_All	27.01	30.23	24.83	0	0.47	0
CL10247.Contig3_All	136.51	140.24	140.21	103.9	124.99	116.07
CL10247.Contig4_All	98.11	104.57	90.29	118.14	124.94	137.53
CL10248.Contig1_All	3.95	4.52	4.01	2.21	2.09	2.5
CL10248.Contig2_All	0.3	0.18	0.24	0.78	1.25	1.28
CL10249.Contig1_All	0.46	0.16	0.36	2.12	1.72	1.76
CL10249.Contig3_All	1.88	1.53	2.35	4.24	4.74	4.91
CL1025.Contig2_All	0.61	0.78	0.77	12.6	14.32	14.5
CL1025.Contig3_All	0.2	0.12	0.32	4.29	3.4	4.15
CL1025.Contig4_All	2.44	1.62	1.24	1.17	0	0
CL10250.Contig2_All	1.92	2.87	2.5	0.59	0.58	0.99
CL10250.Contig3_All	1.31	1.2	1.57	3.81	4.74	4.19
CL10250.Contig4_All	1.16	1.04	0.71	1.31	1.99	1.59
CL10251.Contig1_All	1.69	1.48	1.65	4.87	6.05	5.3
CL10251.Contig2_All	1.14	0.83	0.58	0.38	0.38	0.33
CL10251.Contig3_All	1.11	0.7	0.91	0.04	0	0.03
CL10251.Contig4_All	2.94	3.2	2.4	3.78	4.12	3.47
CL10252.Contig2_All	2.98	1.16	0.68	0	0	0.23
CL10253.Contig2_All	1.39	0.82	0.9	83.81	82.89	80.35
CL10253.Contig3_All	2.76	2.95	3.08	0.67	1.17	0.51
CL10254.Contig1_All	0.3	0.3	0.49	0.04	0	0.04
CL10255.Contig2_All	4.11	3.28	2.16	0	0	0
CL10256.Contig4_All	46.93	48.42	48.47	14.96	16.71	14.88
CL10257.Contig1_All	0	0.32	0	1.58	1.25	1.28
CL10257.Contig4_All	1.51	4.21	3.42	0	0	0
CL10260.Contig1_All	0.47	1.47	1.4	0	0	0
CL10260.Contig3_All	4.82	3.1	4.45	2.28	1.81	1.73
CL10260.Contig4_All	6.35	4.84	6.29	0.53	0.9	1
CL10262.Contig1_All	1.95	2.58	1.94	0.08	0.48	0.49
CL10262.Contig2_All	1.72	1.7	1.63	0.15	0.51	0.18
CL10263.Contig1_All	0.63	1.8	0	0	0	0
CL10263.Contig2_All	1.8	3.05	3.58	0	0	0
CL10263.Contig3_All	6.45	5.55	6.57	9.81	10.12	10.29
CL10263.Contig4_All	6.42	6.44	5.87	3.4	2.54	2.58
CL10264.Contig3_All	2.14	1.99	1.8	3.06	2.63	2.62
CL10265.Contig1_All	3.49	3.18	3.83	0.26	0.08	0.17
CL10265.Contig2_All	4.36	2.27	3.43	0	0.13	0
CL10266.Contig1_All	4.83	5.2	4.3	1.22	1.14	1.23
CL10266.Contig2_All	1.57	1.33	2.61	0.26	0	0.13
CL10267.Contig1_All	2.05	1.16	1.36	0	0	0
CL10268.Contig1_All	1.24	2.28	2.02	0.82	0.6	0.94
CL10268.Contig2_All	5.74	5.26	6.59	1.58	1.61	1.24
CL1027.Contig1_All	0.04	0.27	0.23	8.51	8.21	8.48
CL1027.Contig2_All	5	4.36	5.18	13.16	13.62	11.05
CL1027.Contig3_All	0.16	0.16	0.16	1.84	1.77	2.05
CL1027.Contig4_All	5.08	4.88	3.76	0.84	1.04	0.85
CL10271.Contig1_All	43.07	49.82	43.72	52.86	54.65	52.63
CL10271.Contig2_All	21.86	20.8	20.14	25.78	27.47	27.64
CL10271.Contig3_All	8.67	8.17	7.01	4.09	3.09	3.58
CL10271.Contig4_All	0	0	0.06	4.19	5.9	4.17
CL10271.Contig5_All	101.26	104.46	97.89	125.91	127.34	127.48
CL10272.Contig1_All	2.72	1.86	2.65	6.7	6.46	7.1
CL10272.Contig2_All	4.34	5.19	5.39	2.43	2.1	2.65
CL10273.Contig2_All	11.36	12.88	11.17	9.09	9.54	9.35
CL10273.Contig3_All	15.91	15.52	14.99	9.21	10.17	10.43
CL10273.Contig4_All	21.05	17.05	21.41	24.36	23.44	23.09
CL10273.Contig5_All	1.94	5.04	3.64	0.92	0.94	1.21
CL10274.Contig2_All	0	0	0	0.54	0.54	0.55
CL10275.Contig2_All	10.22	7.21	9.1	2.03	0.84	2.37
CL10275.Contig4_All	9.38	9.03	11.89	0	0	0
CL10275.Contig5_All	18.32	22.47	19.67	35.1	33.64	30.8
CL10276.Contig1_All	10.64	11.35	10.8	12.87	14.08	12.41
CL10276.Contig2_All	16.34	16.51	15.4	14.18	13.41	14.19
CL10276.Contig3_All	30.6	30.99	32.37	35.44	37.12	36.91
CL10277.Contig1_All	8.26	7.41	7.93	6.17	6.06	5.61
CL10277.Contig2_All	10.19	9.32	9.4	6.83	6.83	7.07
CL10277.Contig3_All	9.49	9.93	8.21	17.18	16.52	15.91
CL10277.Contig4_All	13.83	14.12	14.53	8.3	9.18	9.05
CL10277.Contig5_All	3.33	3.49	3.15	1.73	1.67	1.96
CL10277.Contig7_All	26.53	26.5	27.68	22.31	23.68	23.64
CL10279.Contig1_All	13.99	15.82	15.28	12.36	12.41	11.99
CL1028.Contig1_All	1.91	1.93	1.44	1.09	0.68	1.12
CL1028.Contig3_All	0.29	0.26	0.51	0.59	0.81	0.65
CL1028.Contig4_All	1.75	1.82	2.06	1.38	0.81	0.8
CL10280.Contig1_All	2.03	2.89	2.23	4.54	5.86	5.29
CL10281.Contig2_All	2.28	2.06	1.96	0.86	0.56	1.05
CL10281.Contig4_All	0.15	0	0.26	0.82	0.67	0.56
CL10281.Contig7_All	4.03	3.67	3.35	2.15	2.41	1.93
CL10283.Contig2_All	0	0	0	0.42	1.01	0.41
CL10285.Contig2_All	1.16	0.59	1.73	0.45	0.11	0.12
CL10286.Contig2_All	0.3	0	0.3	4.19	2.67	3.64
CL10287.Contig1_All	2.97	2.6	2.81	5.83	6.46	5.9
CL10288.Contig1_All	0.13	0.13	0.13	0.71	0.76	0.65
CL10288.Contig2_All	0	0	0.07	1.1	0.65	0.34
CL10288.Contig3_All	3.91	3.03	4.12	0.95	1.26	1.08
CL10289.Contig1_All	6.44	5.98	6.26	0	0	0
CL10289.Contig2_All	0	0.04	0.04	5.68	5.16	5.24
CL10289.Contig3_All	1.64	1.39	0.52	0.05	0.09	0.09
CL10289.Contig4_All	2.18	2.33	2.13	0.18	0.4	0.21
CL10291.Contig1_All	29.09	28.25	33.95	37.19	34.52	35.59
CL10291.Contig2_All	13.82	11.12	12.91	9.34	8.27	9.34
CL10292.Contig1_All	1.36	1.91	1.87	10.99	10.55	10.95
CL10292.Contig2_All	13.26	12.13	12.03	4.07	1.57	4.68
CL10292.Contig3_All	1.05	0.94	0.42	2.43	2.58	3.17
CL10292.Contig5_All	1.77	1.53	1.93	0.44	0.56	0.34
CL10293.Contig1_All	1.27	1.8	3	0.31	0	0.32
CL10294.Contig2_All	2.23	3.64	1.84	0.49	0.42	0.3
CL10294.Contig3_All	1.07	1.9	3.66	0.47	0	0
CL10295.Contig1_All	0.86	0.3	0.5	0	0	0
CL10295.Contig2_All	6.01	5.79	6.1	11.18	13.67	12.4
CL10295.Contig4_All	1.09	0.88	0.98	14.8	12.99	15.36
CL10295.Contig5_All	11.56	11.92	10.67	0.09	0	0
CL10297.Contig1_All	10.71	10.49	11.39	6.6	5.37	6.33
CL10298.Contig1_All	9.4	10.4	9.9	11.5	12.54	11.47
CL103.Contig10_All	0.65	0.18	0.37	1.61	2.52	1.46
CL103.Contig2_All	1.39	1.43	1.61	0.9	0.4	0
CL103.Contig5_All	0	0	0	1.87	2.7	1.08
CL103.Contig6_All	0	0	0	0.16	0.23	0.69
CL103.Contig7_All	1.08	1.55	0.55	0.24	0	0
CL103.Contig9_All	1.01	0.47	0.65	1.14	1.56	1.6
CL1030.Contig2_All	3.48	4.05	4.05	2.03	2.34	2.66
CL1030.Contig5_All	0.93	0.66	0.74	0.09	0	0
CL1030.Contig6_All	1.77	0.76	1.24	3.11	3.06	2.96
CL1030.Contig7_All	1.52	1.38	1.86	0.28	0.3	0.14
CL1030.Contig8_All	1.82	1.68	1.39	0.05	0	0
CL10300.Contig3_All	3.88	3.85	4.54	2.5	3.03	2.4
CL10300.Contig4_All	2.22	2.51	2.81	5.7	5.61	5.39
CL10302.Contig2_All	1.9	3.8	2.2	0.27	0.32	0.52
CL10303.Contig1_All	5.03	7	5.7	1.98	2.28	2.89
CL10304.Contig1_All	0	0	0	6.1	5.04	4.9
CL10305.Contig1_All	3.35	2.44	2.21	3.96	4.43	5.2
CL10305.Contig8_All	3.47	3.07	2.49	4.8	4.57	5.4
CL10307.Contig2_All	0.41	0.47	0.52	0	0	0
CL10308.Contig1_All	0	0.18	0	5.72	4.89	4.25
CL10308.Contig4_All	2.78	2.33	3.48	6.09	5.96	4.48
CL10308.Contig6_All	13.68	13.55	13.48	9.26	10.08	9.11
CL10309.Contig1_All	14.97	17.26	19.16	13.36	11.79	13.26
CL10309.Contig3_All	3.46	4.95	5.7	1.1	0.76	0.65
CL1031.Contig10_All	178.82	186.1	185.77	61.19	57.58	60.54
CL1031.Contig11_All	70.85	71.86	69.06	46.22	43.67	46.47
CL1031.Contig12_All	7.62	6.67	7.72	2.76	2.94	2.3
CL1031.Contig13_All	398.35	395.64	397.58	140.38	129.05	136.4
CL1031.Contig15_All	6.93	6.29	6.91	55.21	52.51	51.87
CL1031.Contig16_All	55.52	59.4	53.3	143.37	147.36	146.51
CL1031.Contig17_All	16.9	17.09	18.04	40.63	40.87	40.59
CL1031.Contig18_All	42.51	45.81	47.98	2.87	2.21	2.23
CL1031.Contig19_All	43.21	45.05	46.19	11.33	12.33	12.81
CL1031.Contig1_All	0.09	0.13	0.16	3.2	3.15	3.1
CL1031.Contig20_All	245.12	253.1	246.98	17.75	18.42	16.94
CL1031.Contig22_All	212.24	219.09	227.53	197.52	184.15	192.69
CL1031.Contig23_All	3.89	3.88	4.1	2.13	1.51	2.19
CL1031.Contig24_All	604.18	607.28	618.27	193.9	180.91	195.04
CL1031.Contig2_All	0.17	0.4	0.22	9.64	9.36	10.06
CL1031.Contig3_All	0.02	0.13	0.04	33.98	31.7	34.42
CL1031.Contig4_All	8.57	9.45	8.12	0.78	0.69	0.63
CL1031.Contig5_All	349.76	345.92	344.24	36.46	32.83	32
CL1031.Contig6_All	33.56	33.25	33.09	72.16	70.17	75.02
CL1031.Contig7_All	157.77	153.07	150.54	50.73	50.88	51.98
CL1031.Contig8_All	3.6	3.3	3.47	7.8	8.77	7.83
CL1031.Contig9_All	8.02	8.67	7.29	35.82	35.32	35.93
CL10310.Contig1_All	1.03	1.39	0.67	0	0	0
CL10310.Contig2_All	2.06	1.22	1.42	0	0	0
CL10310.Contig3_All	0.38	0.15	0.41	0	0	0
CL10314.Contig2_All	4.12	4.87	4.62	0	0	0
CL10314.Contig3_All	14.58	14.25	15.01	0	0.2	0
CL10314.Contig4_All	67.6	65.15	62.37	75.47	68.54	77.29
CL10314.Contig5_All	11.98	14.38	10.59	0	0.16	0.08
CL10315.Contig1_All	68.29	75.99	68.74	88.32	87.4	86.13
CL10315.Contig2_All	3.54	2.36	3.33	0	0	0
CL10315.Contig3_All	9.57	9.22	8.69	5.83	5.48	4.3
CL10315.Contig5_All	10.7	10.24	10.48	8.03	7.41	9.41
CL10316.Contig1_All	4.36	4.67	5.45	6.44	8.59	7.35
CL10316.Contig2_All	34.04	33.71	30.31	26.23	27.68	27.79
CL10317.Contig1_All	27.07	26.39	29.39	1.72	1.79	1.96
CL10317.Contig2_All	15.43	17.9	18.39	12.37	12.89	10.73
CL10317.Contig3_All	0.26	0.74	0.27	23.16	19.87	23.31
CL10318.Contig1_All	0.23	0.35	0.62	1.85	2.19	2.08
CL10318.Contig3_All	0.87	0.47	0.35	2.71	2.18	2.41
CL10318.Contig5_All	4.13	3.52	3.32	6.68	6.06	6.87
CL1032.Contig1_All	0.97	0.55	0.57	29.51	31.52	31.32
CL1032.Contig2_All	0	0	0.09	4.48	5.31	5.02
CL1032.Contig3_All	17.98	19.65	18.25	4.15	4.46	3.75
CL10320.Contig1_All	19.64	21.03	18.89	24.6	24.65	23.7
CL10320.Contig2_All	3.25	3.62	3.76	4.76	5.04	4.39
CL10320.Contig3_All	12.73	13	11.7	7.48	7.81	7.31
CL10320.Contig4_All	1.74	1.94	1.69	17.24	16.61	18.25
CL10321.Contig2_All	1.77	2.05	2.38	1.03	1.09	0.88
CL10321.Contig3_All	4.31	5.51	4.94	2.45	2.51	2.09
CL10321.Contig4_All	7.28	6.89	6.77	8.54	8.06	8.39
CL10322.Contig1_All	1.34	1.67	1.13	0	0	0.01
CL10322.Contig2_All	2.84	3.28	2.67	5.89	5.4	5.26
CL10322.Contig3_All	4.67	4.69	4.42	4.08	3.78	3.85
CL10323.Contig3_All	1.84	1.56	2.29	5.73	4.63	4.89
CL10324.Contig1_All	25.01	27.37	24.14	51.32	52.58	45.72
CL10324.Contig2_All	34.3	33.36	29.19	4.36	4.21	6.18
CL10324.Contig3_All	2.63	2.86	1.63	6.85	7.37	8.67
CL10325.Contig2_All	0	0.09	0.13	2.64	2.27	1.76
CL10325.Contig3_All	0	0	0	1.08	1.62	1.37
CL10325.Contig4_All	0.04	0	0.04	2.02	1.7	1.12
CL10326.Contig1_All	12	12.1	14	15.32	16.39	19.71
CL10327.Contig1_All	1.96	1.99	1.92	0	0	0
CL10327.Contig2_All	1.6	2.63	1.19	0	0	0
CL10328.Contig1_All	5.82	5.86	5.46	2.32	3.51	3.59
CL10328.Contig2_All	6.65	5.45	5.31	1.7	2.44	1.75
CL10329.Contig3_All	4.2	4.54	3.66	0	0	0
CL10329.Contig4_All	0.53	0.35	0.4	7.35	7.67	6.7
CL10329.Contig6_All	1.39	1.66	3.05	0.8	1	0.69
CL1033.Contig1_All	2.5	1.13	1.43	4.35	2.69	3.51
CL1033.Contig2_All	4.4	3.58	3.85	9.82	8.59	7.04
CL1033.Contig3_All	0.72	1.18	0.91	1.56	2.63	1.8
CL1033.Contig5_All	7.21	8.8	8.52	3.24	3.72	2.95
CL1033.Contig6_All	6.42	5.06	6.55	12.77	12.72	11.92
CL10330.Contig2_All	1.36	1.19	1	0.5	0.16	0.17
CL10330.Contig3_All	2.61	2.68	2.3	0.53	0.76	0.55
CL10330.Contig4_All	3.28	2.89	2.76	5.23	4.17	4.02
CL10331.Contig1_All	17.71	14.94	12.51	1.41	1.59	2.36
CL10331.Contig3_All	31.62	32.11	33.55	45.51	45.33	46.53
CL10332.Contig2_All	0.71	0.5	0.37	0	0	0
CL10332.Contig3_All	2.16	3.34	4.13	8.22	11.04	7.55
CL10332.Contig4_All	4.51	4.25	4.48	1.66	2.29	1.74
CL10333.Contig4_All	0.13	0	0	1.04	0.72	0.95
CL10333.Contig6_All	1.66	1.43	1.36	2.85	2.68	2.55
CL10335.Contig2_All	0.6	0.71	0.5	7.29	6	5.36
CL10335.Contig4_All	7.9	7	7.55	3.73	3.78	4.84
CL10337.Contig1_All	4.3	2.78	4.55	0	0	0
CL10337.Contig3_All	0.97	0.73	0.86	0	0	0
CL10337.Contig4_All	0.2	0.37	0.17	0	0	0
CL10337.Contig5_All	0.38	0.19	0.25	0.07	0.07	0.08
CL10337.Contig6_All	1.39	3.79	0.41	9.05	8.25	10.45
CL10337.Contig7_All	8.54	7.8	8.82	2.39	3.08	2.25
CL10338.Contig1_All	4.9	4.45	4.71	0	0	0
CL10338.Contig2_All	5.14	6.09	6.07	7.4	7.1	7.69
CL10339.Contig2_All	1.2	0.86	1.13	3.51	2.9	3.67
CL1034.Contig11_All	1.75	1.9	2.23	2.78	2.7	2.8
CL1034.Contig12_All	1.34	1.55	0.89	0	0	0
CL1034.Contig13_All	1.3	1.79	2.09	0	0	0
CL1034.Contig14_All	16.8	17.47	16.11	5.78	5.06	6.52
CL1034.Contig16_All	1.15	2.39	1.9	0.05	0	0.05
CL1034.Contig17_All	0.19	0.33	0.35	6.41	6.05	5.59
CL1034.Contig19_All	0	0	0	8.14	8.82	8.44
CL1034.Contig1_All	0.04	0.05	0.06	0.35	0.46	0.64
CL1034.Contig20_All	0.1	0.05	0.06	4.33	4.33	4.02
CL1034.Contig21_All	0.45	0.44	0.42	0.01	0.13	0
CL1034.Contig22_All	10.23	9.45	9.2	3.02	3.51	2.99
CL1034.Contig2_All	0	0	0	3.25	3.23	3.62
CL1034.Contig4_All	0.42	0	0	3.32	1.96	3.19
CL1034.Contig5_All	4.35	4.71	5.28	1.62	0.74	1.1
CL1034.Contig6_All	1.02	0.97	1.01	5.35	5.37	4.72
CL1034.Contig7_All	2.52	2.94	2.56	1.93	2.12	1.7
CL10340.Contig1_All	4.44	4.74	2.91	0	0.11	0
CL10341.Contig1_All	0.46	0.85	0.53	0.07	0.07	0.15
CL10343.Contig1_All	9.39	10.05	11.24	30.96	35.18	37.33
CL10343.Contig2_All	3.54	4.44	3.44	7.4	10.98	8.73
CL10344.Contig5_All	0	0.27	0.09	2.71	2.69	2.2
CL10345.Contig1_All	3.94	3.55	3.63	11.44	9.35	11.31
CL10346.Contig3_All	2.3	2.66	2.23	0.38	0	0
CL10346.Contig5_All	1	1.3	0.91	6.78	6.02	5.64
CL10346.Contig6_All	0.25	0.36	0.19	0.55	0.75	1
CL10346.Contig7_All	3.91	2.93	3.01	1.38	0.76	1.16
CL10347.Contig3_All	9.57	10.31	9.1	7.26	7.02	7.18
CL10347.Contig4_All	4.54	5.29	5.07	7.38	7.77	7.5
CL10349.Contig1_All	1.75	2.01	1.91	0.77	0.39	0.63
CL10349.Contig2_All	3.18	3.24	2.04	0.71	1.06	0.79
CL1035.Contig1_All	5.91	7.44	7.35	0	0	0
CL1035.Contig2_All	0	1.2	0.41	1.93	1.53	2.39
CL1035.Contig3_All	0.28	0.21	0.73	0	0	0.04
CL1035.Contig4_All	0	0	0	1.55	0.92	1.25
CL1035.Contig5_All	3.52	2.88	2.67	0.15	0.31	0.28
CL1035.Contig6_All	2.55	2.45	3.18	39.39	46.22	41.94
CL10350.Contig1_All	1.05	0.36	0.35	4.18	4.49	4.23
CL10351.Contig1_All	0.78	1.23	0.95	2.36	5.12	3.48
CL10351.Contig2_All	2.01	1.73	1.98	1.23	0.74	0.99
CL10351.Contig3_All	1.16	1.22	1	2.44	2.32	2.53
CL10352.Contig1_All	2.96	2.49	3.89	0	0.63	0.25
CL10352.Contig2_All	0.82	0.42	1.02	2.43	4.02	4.32
CL10353.Contig1_All	0.67	1.21	1.11	7	7.4	7.38
CL10353.Contig2_All	0.41	0.29	0.25	0.68	0.73	0.5
CL10353.Contig3_All	0.16	0.11	0.23	0.33	0.57	0.55
CL10354.Contig2_All	2.77	2.11	2.24	0.77	0.84	0.47
CL10355.Contig5_All	0.46	0.41	0.75	0	0	0
CL10357.Contig1_All	1.57	1.76	1.1	0	0.13	0
CL10357.Contig2_All	2.68	2.3	1.47	0	0	0
CL10358.Contig1_All	0.84	1.03	1.1	2.81	2.61	1.87
CL10359.Contig2_All	3	2.63	2.86	0.27	0.27	0.08
CL1036.Contig1_All	0.24	0.29	0.35	2.77	2.76	1.98
CL1036.Contig2_All	0.24	0.05	0.18	3.01	2.81	3.07
CL10360.Contig1_All	0	0.59	0.57	19.63	13.98	15.02
CL10360.Contig2_All	11.59	13.67	16.17	0.23	0	0
CL10360.Contig4_All	2.32	1.17	1.15	0	0	0
CL10360.Contig5_All	0.22	0.45	0.22	0.87	2.37	2.9
CL10360.Contig7_All	0.23	0	0.23	28.89	24.16	20.38
CL10361.Contig10_All	0	0.01	0	0.16	0.06	0.12
CL10361.Contig13_All	0.29	0.43	0.36	1.48	1.33	1.42
CL10361.Contig16_All	0	0	0	1.43	1.09	1.63
CL10361.Contig22_All	5.82	3.27	3.57	0.68	0.64	1.59
CL10361.Contig2_All	0.64	0.13	0.13	1.66	2.97	2.01
CL10361.Contig6_All	1.13	1.27	0.86	0.75	0.59	0.54
CL10361.Contig8_All	0.21	0.3	0.31	1.57	1.92	1.68
CL10361.Contig9_All	0.09	0	0.04	0.1	0.33	0.5
CL10363.Contig3_All	1.45	1.4	1.09	2.95	3.25	2.86
CL10363.Contig4_All	20.18	18.65	15.3	29.77	32.62	31.2
CL10364.Contig1_All	2.6	2.61	3.2	8.46	9.74	10.91
CL10364.Contig2_All	9.85	9.99	9.55	5.91	6.02	6.52
CL10364.Contig3_All	6.27	6.7	6.55	3.71	3.67	3.3
CL10365.Contig1_All	1.62	1.44	1.99	2.93	3.28	3.12
CL10365.Contig3_All	2.87	1.79	1.43	4.61	4.1	4.75
CL10365.Contig4_All	10.91	12.59	13.05	5.41	5.4	5.65
CL10366.Contig1_All	1.89	1.46	1.75	4.4	3.25	4.01
CL10366.Contig2_All	7.64	9.51	6.94	4.45	5.37	4.59
CL10366.Contig3_All	13.97	13.33	13.86	18.38	18.5	18.51
CL10367.Contig2_All	9.74	9.29	9.01	6.34	7.98	8.16
CL10367.Contig4_All	15.94	15.09	15.56	22.26	21.9	22.39
CL10369.Contig1_All	14.45	14.69	14.46	8.92	7.06	7.86
CL10369.Contig2_All	6.28	5.94	5.9	23.57	24.68	24.34
CL1037.Contig1_All	2.07	1.47	1.85	0.44	0.9	0.58
CL1037.Contig3_All	0	0.24	0	0.86	1.53	0.63
CL1037.Contig5_All	0	0	0	0.4	0	0.43
CL1037.Contig8_All	8.1	9.4	9.61	7.14	7.02	6.03
CL10370.Contig3_All	6.03	5.66	5.9	4.28	5.22	4.07
CL10370.Contig4_All	0.57	0.8	0.42	1.72	1.34	1.61
CL10371.Contig2_All	4.51	3.15	3.55	1.66	1.33	1.6
CL10371.Contig4_All	0.47	0.42	0.5	2.3	2	2.04
CL10371.Contig5_All	7.35	7.18	6.71	1.31	1.07	0.72
CL10372.Contig1_All	0	0	0	0.81	1.61	1.37
CL10373.Contig2_All	2.11	2.45	2.76	8.22	9.28	8.27
CL10373.Contig3_All	4.88	4.18	5.06	0	0.04	0.1
CL10374.Contig2_All	4.49	3.19	4.03	9.73	10.94	11
CL10376.Contig1_All	2.63	1.81	2.62	0.14	0.32	0
CL10376.Contig2_All	3.35	2.66	3.23	1.03	1.55	1.25
CL10376.Contig3_All	11.04	9.53	10.72	4.74	5.16	5.59
CL10378.Contig1_All	10.24	11.62	9.74	3.34	3.02	3.22
CL10378.Contig2_All	5.67	4.48	5.47	2.35	2.36	2.28
CL10379.Contig1_All	4.83	4.77	4.64	12.28	12.34	12.89
CL10379.Contig5_All	6.8	5.4	5	1.15	0.98	0.86
CL1038.Contig5_All	1.74	1.66	1.29	3.16	3.82	3.08
CL10380.Contig1_All	0	0	0	0.65	1.13	1.45
CL10380.Contig2_All	0	0	0	3.65	2.77	2.07
CL10381.Contig4_All	6.76	5.64	7.08	4.38	3.13	3.05
CL10381.Contig5_All	0.74	0.34	0.59	1.03	0.92	0.88
CL10382.Contig1_All	3.05	2.71	2.87	5.08	4.38	3.71
CL10382.Contig2_All	0.34	0.45	0.57	4.48	4.71	4.2
CL10382.Contig3_All	5.34	6.45	5.74	2.63	1.72	2.63
CL10382.Contig4_All	0.14	0.68	0.26	1.59	1.96	2.23
CL10382.Contig5_All	6.12	6.06	6.46	8.71	8.46	7.94
CL10383.Contig1_All	1.48	1.1	0.26	2.84	3.38	4.88
CL10384.Contig1_All	1.32	1.29	1.41	0	0	0
CL10385.Contig1_All	1.61	1.49	1.21	0.87	0.65	0.8
CL10386.Contig3_All	32.15	19.67	24.17	34.71	34.9	35.3
CL10387.Contig2_All	4.92	3.22	3.11	0	0	0
CL10388.Contig2_All	0	0	0	1.98	2.46	1.7
CL10388.Contig3_All	0	0	0	2.01	1.45	2.61
CL10388.Contig4_All	1.86	2.42	2.89	0	0	0.27
CL10389.Contig1_All	6.95	5.52	5.41	7.56	9.34	6.81
CL10389.Contig4_All	1.31	1.72	1.7	0	0.06	0
CL1039.Contig1_All	0.68	0.78	0.77	43.12	41.05	40.75
CL1039.Contig2_All	57.18	57.25	55.43	52.38	52.06	50.05
CL1039.Contig4_All	51.62	54.02	50.23	24.05	26.05	26.67
CL10390.Contig1_All	15.6	14.95	15.25	4.96	4.78	3.91
CL10390.Contig2_All	1.27	0.87	1.66	5.69	5.3	4.83
CL10391.Contig1_All	4.07	4.06	3.59	5.55	5.01	5.54
CL10391.Contig2_All	6.62	7.79	6.9	4.06	3.79	3.39
CL10392.Contig1_All	1.55	1.46	1	0.22	0.32	0.33
CL10392.Contig2_All	1.11	1.3	1.4	0.4	0.28	0.64
CL10394.Contig1_All	2.8	3.5	2.27	0.1	0.43	0.42
CL10394.Contig2_All	2.61	2.54	2.52	0.5	0.3	0.21
CL10395.Contig1_All	0.03	0.33	0.28	5.57	2.76	3.65
CL10395.Contig3_All	2.05	1.77	2.87	4	2.72	3.2
CL10395.Contig5_All	9.13	10.44	9.07	1.73	2.7	2.61
CL10396.Contig2_All	0.69	0.44	0.66	3.1	2.26	4.38
CL10396.Contig3_All	0.39	0.67	0.52	2.32	1.15	2.09
CL10397.Contig2_All	8.74	8.82	8.71	7.36	7.47	7.8
CL10398.Contig2_All	2.8	1.76	2.73	12.53	12.38	10.41
CL10398.Contig3_All	8.39	8.67	8.76	12.72	13.2	10.8
CL10399.Contig1_All	4.3	3.47	4.8	0.17	1.53	0.57
CL104.Contig11_All	0	0	0	0.13	0.14	0.45
CL104.Contig13_All	8.06	8.13	9.5	3.72	2.91	3.5
CL104.Contig15_All	2.59	2.05	1.6	0.55	0.3	0.16
CL104.Contig16_All	10.85	12.04	10.81	1.31	1.83	1.08
CL104.Contig17_All	2.67	1.8	2.61	8.08	7.34	8.9
CL104.Contig2_All	1.15	0.88	0.21	4.32	3.73	4.05
CL104.Contig6_All	10.26	9.12	8.13	1.54	1.71	1.95
CL104.Contig7_All	1.27	0.78	0.39	2.49	3.17	2.09
CL1040.Contig10_All	26.33	26.92	24.76	13.28	14.82	15.13
CL1040.Contig11_All	28.26	27.81	28.24	12.49	13.08	11.65
CL1040.Contig12_All	51.48	49.55	48.96	19.96	22.24	21.16
CL1040.Contig1_All	20.69	21.33	21.06	8.7	14.86	12.33
CL1040.Contig2_All	0	0.33	0	3.49	3.15	2.57
CL1040.Contig4_All	3.2	3.46	4.08	2.2	2.5	2.36
CL1040.Contig5_All	4.15	4.11	3.16	6.5	6.67	7.85
CL1040.Contig6_All	12.92	14.09	12.31	30.84	32.65	30.93
CL1040.Contig7_All	5.48	5.83	4.45	7.22	6.74	6.32
CL1040.Contig8_All	8.13	8.77	8.1	12.61	13.87	13.06
CL1040.Contig9_All	13.79	12.75	11.7	4.78	6.16	5.69
CL10400.Contig1_All	0.3	0.29	0	1.04	0.58	3.4
CL10400.Contig2_All	5.29	4.87	4.17	2.55	3.27	2.57
CL10400.Contig3_All	0.54	0.66	0.46	1.89	2.19	1.79
CL10400.Contig4_All	2.13	2	2.22	3.55	3.74	3.66
CL10400.Contig5_All	0	0	0	10.97	11.85	9.65
CL10401.Contig3_All	2.8	3.27	1.79	0.6	0.44	0.65
CL10401.Contig5_All	0.28	0.47	1.11	0.15	0.11	0
CL10401.Contig6_All	2.08	1.57	2.36	3.96	4.64	3.92
CL10402.Contig1_All	0.52	0.53	0.29	0	0	0
CL10402.Contig2_All	3.32	3.36	2.62	5.32	4.37	4.85
CL10402.Contig3_All	0	0	0	0.24	0.3	0.45
CL10402.Contig5_All	0	0.91	0.71	9.06	8.45	7.97
CL10402.Contig6_All	15.1	14.66	13.35	0.43	0.32	0.2
CL10403.Contig1_All	3.71	5.16	2.97	0	0	0
CL10403.Contig2_All	2.87	3.53	1.5	0.12	0	0
CL10403.Contig3_All	1.16	2.34	4.5	0	0	0
CL10404.Contig1_All	4.98	4.72	4.83	3.39	4.2	3.16
CL10404.Contig2_All	1.77	1.46	1.78	1.29	0.43	1.07
CL10405.Contig1_All	0.41	0.48	0.41	2	1.78	1.15
CL10406.Contig1_All	0.06	0	0	8.8	10.62	9.22
CL10406.Contig2_All	3.39	3.16	3.24	0.05	0.11	0.24
CL10406.Contig3_All	0.35	0.46	0.09	1.79	1.64	1.48
CL10406.Contig4_All	0.62	1.4	0.44	2.6	3.04	2.31
CL10406.Contig5_All	3.85	4.89	5.43	0.62	0.91	1.33
CL10406.Contig6_All	17.24	13.8	17.96	8.65	9.85	8.36
CL10408.Contig1_All	2.02	1.52	1.68	0.27	0	0
CL10408.Contig4_All	1.95	1.52	1.93	3.85	3.18	5.43
CL10409.Contig2_All	0.27	0.75	0.56	0	0	0
CL10409.Contig3_All	0	1.1	0.41	7.17	7	7.65
CL10411.Contig2_All	2.44	2.25	1.38	4.8	5.76	3.63
CL10411.Contig3_All	3.93	4.01	4.87	2.12	1.56	2.85
CL10411.Contig5_All	2.34	2.73	2.73	0.91	0.77	1.25
CL10411.Contig6_All	1.86	3.21	2.47	4.17	4.47	4.95
CL10413.Contig3_All	0.12	0	0.07	0.29	0.42	0.38
CL10413.Contig4_All	0.28	0.23	0.5	5.19	5.71	6.06
CL10414.Contig3_All	0.45	0.34	0.48	3.74	3.26	4.09
CL10414.Contig4_All	11.31	8.41	9.64	4.41	2.44	3.69
CL10415.Contig3_All	0.79	1.54	1.92	24.18	28.11	22.79
CL10416.Contig2_All	12.03	12.64	10.91	5.1	6.48	5.48
CL10419.Contig1_All	0.34	0.35	0.28	4.94	6.03	6.01
CL10419.Contig2_All	1.63	1.24	2.39	0	0	0
CL1042.Contig2_All	1.84	1.4	2	0.64	0	0.34
CL1042.Contig3_All	0	0.74	0	1.39	1.06	1.07
CL1042.Contig4_All	1.62	1.49	1.4	0.54	0.85	0.54
CL1042.Contig5_All	1.18	1.39	1.33	0.56	0.69	0.49
CL10420.Contig1_All	0	0	0	2.21	2.32	2.38
CL10420.Contig2_All	3.79	2.98	3.28	0.14	0.07	0.05
CL10420.Contig3_All	4.35	5.62	4.84	7.79	7.37	7.02
CL10420.Contig4_All	3.8	3.69	4.2	5.59	4.47	5.66
CL10421.Contig1_All	0.37	0.49	0.36	0.92	0.83	0.73
CL10421.Contig2_All	3.63	3.07	3.85	1.42	1	1.31
CL10421.Contig3_All	2.64	2.46	2.57	4.8	4.85	4.67
CL10423.Contig3_All	0.49	0.99	0.24	2.71	3.47	1.74
CL10426.Contig1_All	2.67	1.6	1.99	0.06	0	0.06
CL10426.Contig2_All	2.56	3.89	3.51	0	0.06	0
CL10426.Contig3_All	0	0	0	2.27	3.02	2.04
CL10427.Contig1_All	4.64	3.42	3.94	1.59	1.78	1.42
CL10427.Contig3_All	4.28	4.12	4.48	2.06	2.31	2.08
CL10427.Contig4_All	1.7	1.41	1.85	3.03	2.57	3.02
CL10427.Contig5_All	5.27	6.16	5.49	1.04	0.43	0.43
CL10427.Contig6_All	3.07	2.6	3.44	0.77	0.58	0.41
CL10427.Contig7_All	1.2	1.11	0.88	0.34	0.1	0.07
CL10427.Contig8_All	1.42	2.25	1.55	4.61	4.73	4.89
CL10428.Contig3_All	0.76	0.42	0.84	11.11	11.7	10.84
CL10429.Contig1_All	2.37	1.75	0.85	0	0.42	0.43
CL10429.Contig2_All	5.02	5.57	5.02	3.91	4.22	4.16
CL10431.Contig1_All	0	0.37	0.68	1.29	1.79	2.28
CL10431.Contig2_All	2.08	1.75	1.33	12.36	13.46	13.12
CL10431.Contig3_All	0	0	0	1.01	1.16	1.53
CL10431.Contig4_All	6.27	6.3	6.67	0.36	0.35	0.64
CL10431.Contig5_All	9.17	7.93	6.52	40.34	39.22	38.28
CL10432.Contig2_All	12.79	13.82	12.71	15.78	16.01	15.94
CL10435.Contig1_All	0	0.1	0	0.75	1.04	0.35
CL10435.Contig2_All	1.05	0.85	0	7.59	6.7	6.66
CL10435.Contig3_All	1.92	2.26	1.51	0	0	0
CL10436.Contig1_All	0.48	0.35	0.78	4.33	4.31	3.64
CL10436.Contig2_All	0.37	0.59	0.58	5.21	5.39	5.06
CL10436.Contig3_All	3.77	2.91	3.61	2.4	1.36	2.27
CL10438.Contig1_All	5.03	2.87	5.74	0	0	0
CL10438.Contig2_All	12.53	10.46	7.32	0	0	0
CL10438.Contig3_All	1.14	1.6	3.14	0	0	0
CL10438.Contig4_All	1.89	1.17	3.11	0	0	0
CL10438.Contig5_All	4.83	1.45	2.46	0	0	0
CL1044.Contig1_All	1.17	0.89	0.72	0.04	0.05	0.21
CL1044.Contig2_All	0.31	0.42	0.42	9.05	10.3	9.86
CL1044.Contig4_All	1.28	0.97	1.33	2.26	2.3	2.16
CL1044.Contig7_All	1.36	2.17	1.69	10.99	10.98	12.21
CL1044.Contig8_All	1.49	1.34	0.98	9.54	10.03	9.01
CL10440.Contig1_All	11.75	10.93	12.19	4.39	8.25	4.07
CL10440.Contig2_All	9.05	8.5	8.46	14.39	18.71	19.43
CL10440.Contig4_All	5.65	6.14	7.13	3.07	3.19	2.82
CL10441.Contig7_All	3.22	3.22	2.91	2.41	1.93	2.42
CL10441.Contig8_All	3.24	2.62	3.23	0.43	0.27	0.26
CL10442.Contig2_All	5.25	5.29	5.49	19.1	18.6	16.72
CL10443.Contig2_All	0.09	0.09	0.26	1.44	1.26	0.86
CL10444.Contig1_All	3.06	2.86	3.27	0.18	0.01	0.13
CL10444.Contig2_All	1.28	0.95	0.94	0.4	0.61	0.62
CL10444.Contig3_All	3.29	2.73	2.97	0.65	0.81	0.42
CL10444.Contig4_All	0	0.05	0.05	0.72	0.71	0.96
CL10444.Contig5_All	4.99	5.03	4.68	8.02	7.65	6.83
CL10444.Contig6_All	0.27	0.36	0.35	0	0.1	0.14
CL10444.Contig8_All	4.39	3.91	4.34	2.98	3.4	3.27
CL10444.Contig9_All	0.09	0.16	0.22	0.47	0.37	0.55
CL10445.Contig1_All	1.02	1.21	1.47	4.58	4.33	4.36
CL10445.Contig2_All	3.84	4.16	2.48	1.9	1.47	2.61
CL10445.Contig4_All	0	0	0	21	20.28	19.13
CL10445.Contig5_All	4.68	3.69	3.84	9.02	10.71	10.01
CL10445.Contig7_All	0	0.04	0	2.38	3.38	2.53
CL10445.Contig8_All	0.03	0	0.07	0.76	0.68	0.65
CL10446.Contig1_All	7.91	6.93	5.54	12.65	14.49	14.73
CL10446.Contig3_All	0	0.73	0.51	15.29	11.99	14.78
CL10447.Contig1_All	5.72	4.4	4.78	1.67	3.1	1.15
CL10447.Contig2_All	22.84	23.18	23.38	36.85	38.31	36.44
CL10447.Contig3_All	0	0	0	0.29	1.08	1.28
CL10447.Contig4_All	1.32	1.63	2.2	4.88	4.44	4.83
CL10447.Contig6_All	4.72	4.79	4.84	18.28	15.54	17.93
CL10447.Contig7_All	37.92	40.94	40.68	22.68	26.98	25.55
CL10448.Contig1_All	3.17	3.13	3.06	5.61	7.58	5.83
CL10448.Contig2_All	2.12	1.86	3.03	0.21	0.54	0.92
CL10448.Contig3_All	17.6	19.38	18.17	12.45	8.64	10.71
CL10448.Contig4_All	1.74	1.67	1.65	8.04	6.8	8.91
CL1045.Contig10_All	1.47	1.72	1.53	0.92	0.63	0.78
CL1045.Contig11_All	2.43	1.27	2.38	0.59	1.4	0.7
CL1045.Contig1_All	3.62	3.76	3.42	0	0	0
CL1045.Contig3_All	1.35	2.13	2.18	0.91	0.87	0.82
CL1045.Contig4_All	3.09	2.36	3.35	2.27	1.35	1.51
CL1045.Contig5_All	1.86	2.1	1.07	0	0.32	0.19
CL1045.Contig6_All	1.62	0.73	0.86	0	0.05	0.11
CL10450.Contig1_All	0.45	0.41	0.59	0.14	0.18	0.18
CL10451.Contig1_All	3.31	1.49	2.04	6.85	11.07	8.65
CL10451.Contig2_All	154.14	159.44	155.16	200.65	207.15	211.49
CL10452.Contig1_All	0.81	1.02	0.58	31.62	32.58	30.6
CL10452.Contig2_All	29.31	28.91	29.84	17.37	16.69	17.11
CL10454.Contig1_All	2.28	1.96	1.22	10.47	12.53	10.85
CL10454.Contig2_All	12.94	12.08	12.21	17.75	19.81	16.29
CL10454.Contig3_All	4.12	5.38	5.28	6.26	7.57	7.08
CL10454.Contig4_All	6.33	7	6.35	0	0	0
CL10454.Contig7_All	22.03	20.41	20.61	27.33	24.11	24.33
CL10455.Contig1_All	0	0	0	1.68	2.21	1.25
CL10456.Contig1_All	0	0	0	0.61	0.46	0.58
CL10456.Contig2_All	0	0	0	1.46	0.92	1.42
CL10457.Contig2_All	13.63	14.43	14.37	4.33	4.72	5.64
CL10457.Contig3_All	8.28	6.81	6.11	2.53	1.67	2.82
CL10458.Contig2_All	2.96	1.7	1.27	0	0	0.35
CL10458.Contig3_All	1.96	1.71	2.1	0.95	0.75	0.42
CL10459.Contig2_All	0	0	0	3.07	3.53	2.77
CL10459.Contig3_All	2.93	2.73	3.1	0	0	0
CL1046.Contig1_All	140.6	134.69	146.94	69.79	65.49	72.85
CL1046.Contig3_All	9.38	8.28	10.65	27.71	26.81	28.65
CL1046.Contig4_All	9.84	11.85	10.79	6.47	8.39	4.9
CL10462.Contig2_All	0.98	0.68	0.8	1.62	1.78	1.94
CL10463.Contig3_All	3.05	2.85	2.5	9.2	10.51	8.09
CL10464.Contig4_All	17.38	18.84	18.76	3.08	4.13	3.94
CL10465.Contig1_All	8.19	11.35	7.94	73.65	73.68	82.7
CL10465.Contig2_All	53.56	55.07	54.56	11.05	15.23	11.3
CL10466.Contig1_All	10.26	10.21	9.07	2.52	2.77	1.7
CL10466.Contig2_All	3.68	3.29	3.09	18.53	19.3	19.91
CL10467.Contig2_All	2.29	2.04	2.65	0.61	0.39	0.58
CL10467.Contig3_All	5.98	6.53	5.56	4.02	4.82	3.42
CL10467.Contig4_All	0.6	0.68	0.79	5.45	5.61	5.69
CL10467.Contig5_All	0.66	0.67	1.31	0	0	0
CL10468.Contig1_All	15.78	13.07	12.29	7.13	6.68	5.86
CL10469.Contig2_All	1.64	1.09	1.54	30.24	29.79	31.74
CL10469.Contig3_All	0.98	0.64	0.97	0.06	0	0.29
CL10469.Contig5_All	14.65	14.45	15.11	0	0	0
CL1047.Contig1_All	4.8	3.19	3.57	31.14	33.36	31.11
CL1047.Contig2_All	70.79	71.39	71.06	18.82	20.25	20.46
CL1047.Contig3_All	31.63	32.73	32.78	180.58	179.01	182.12
CL1047.Contig4_All	12.15	12.58	13.09	5.58	5.18	5.53
CL1047.Contig5_All	25.11	27.29	24.59	12.68	13.54	12.64
CL1047.Contig6_All	0	0	0	0.38	0.39	0.76
CL1047.Contig7_All	28.43	27.28	28.85	9.75	9.9	9.48
CL1047.Contig8_All	0.12	0	0.25	2.65	2.52	2.98
CL1047.Contig9_All	13.19	14.58	14.86	2.13	1.32	1.73
CL10470.Contig1_All	0	0	0	1.18	0.7	0.36
CL10470.Contig2_All	0.79	1.48	1.82	0	0	0
CL10470.Contig3_All	0.16	0	0	1.83	1.03	1.91
CL10471.Contig1_All	2.7	3.07	5.83	0	0.35	0
CL10471.Contig2_All	1.71	1.02	1.3	3.26	2.8	5.02
CL10473.Contig1_All	12.5	12.12	11.48	10.29	8.61	8.89
CL10473.Contig3_All	7.13	6.47	5.75	1.3	1.33	1.54
CL10474.Contig1_All	8.51	10.01	9.48	0.53	1.28	0.89
CL10474.Contig2_All	0.45	0.35	0.29	3.14	1.87	2.68
CL10474.Contig3_All	0	0.33	0.26	1.24	1.19	1.4
CL10474.Contig4_All	6.29	6.75	5.82	0.96	1.54	1.68
CL10474.Contig5_All	3.48	3.54	3.86	8.51	7.71	8.33
CL10475.Contig1_All	7.01	7.15	8.89	5.63	4.45	4.77
CL10479.Contig1_All	1.71	1.47	1.43	0.13	0.22	0.19
CL10479.Contig2_All	0.7	0.98	1.02	0.3	0.35	0.58
CL1048.Contig1_All	0	0	0	3.17	2.53	0.64
CL10480.Contig2_All	3.02	4.06	4.16	7.55	7.22	7.12
CL10480.Contig3_All	2.37	1.43	1	4.14	4.55	4.35
CL10481.Contig1_All	1.47	1.01	1.43	0.08	0.08	0.17
CL10482.Contig1_All	1.36	1.37	0.51	2.83	4.78	4.56
CL10483.Contig2_All	1.36	1.07	1.22	2.62	2.69	3.72
CL10484.Contig1_All	4.53	4.62	4.64	1.48	2	1.34
CL10484.Contig2_All	3.85	4.01	4.12	1.51	1.37	1.45
CL10484.Contig3_All	5.74	6.33	5.68	1.34	1.19	1.89
CL10484.Contig4_All	3.69	3.53	3.97	11.02	10.55	10
CL10484.Contig5_All	0.79	1.15	1.52	3.38	3.56	2.45
CL10485.Contig1_All	3.22	3.67	4.02	2.12	2.58	2.07
CL10485.Contig3_All	5.29	6.46	5.56	3.85	4.07	3.49
CL10485.Contig4_All	1.32	1.5	1.89	3.05	3.09	3.67
CL10485.Contig5_All	3.42	3.57	2.39	1.87	1.81	1.83
CL10486.Contig1_All	22.31	23.59	23.97	41.47	45.65	46.41
CL10486.Contig3_All	25.05	23.71	24.57	31.7	29.96	32.84
CL10488.Contig1_All	7.25	7.3	5.95	1.9	1.36	2.08
CL10488.Contig3_All	4.98	5.03	5.38	9.89	8.56	9.17
CL10489.Contig1_All	1.87	1.9	0.62	0	0	0
CL10489.Contig2_All	1.57	2.28	1.82	0.67	0.47	1.26
CL1049.Contig3_All	8.82	8.93	8.94	12.74	12.52	13.76
CL1049.Contig4_All	1.49	1.72	0.96	6.5	6.52	5.7
CL1049.Contig6_All	0	0.16	0.19	1.27	1.11	1
CL10490.Contig3_All	1.9	2.79	0.85	0.35	0	0
CL10490.Contig5_All	5.63	6.52	6.15	2.51	2.22	3.19
CL10492.Contig1_All	8.89	10.55	7.49	0	0	0
CL10492.Contig3_All	0.5	1.18	0.5	8.98	8.1	6.83
CL10493.Contig2_All	1.78	2	2.22	0	0.12	0.37
CL10493.Contig5_All	0.83	0.77	0.89	0.11	0.06	0.06
CL10494.Contig1_All	0.31	0	0	1.13	0.86	1.79
CL10494.Contig2_All	4.12	5.18	5.35	3.14	4.37	2.8
CL10495.Contig1_All	9.61	9.69	9.37	5.7	4.93	5.5
CL10495.Contig2_All	3.6	3.71	4.08	8.83	7.86	8.12
CL10498.Contig1_All	0.58	0.39	0.16	2.18	2.77	1.73
CL10498.Contig2_All	3.19	3.8	3.78	0.64	0.84	0.86
CL105.Contig10_All	9.99	11.35	9.86	0.47	0.2	0
CL105.Contig11_All	0.11	0.54	0	2.78	2.51	2.17
CL105.Contig12_All	0.21	0.15	0.13	2.13	1.41	1.58
CL105.Contig1_All	1.16	1.08	1.39	14.75	16.33	15.71
CL105.Contig4_All	0	0.07	0	4.88	4.06	3.25
CL105.Contig5_All	0.15	0.36	0.21	5.63	5.06	6.13
CL105.Contig6_All	4.82	5.24	4.64	0	0.07	0.15
CL105.Contig7_All	0.22	1.11	1.67	0	0	0
CL105.Contig8_All	0.38	0.26	0.12	4.49	5.62	5.38
CL105.Contig9_All	0	0	0	0.47	0.5	0.62
CL1050.Contig10_All	0	0	0	1.03	2.59	3.15
CL1050.Contig11_All	0	0.06	0.07	2.81	1.54	1.55
CL1050.Contig12_All	0.39	0	0.09	0	0	0
CL1050.Contig14_All	0.13	0.13	0.25	0	0	0
CL1050.Contig15_All	0.13	0	0	2.55	3.34	2.04
CL1050.Contig16_All	0.52	0.78	0.41	0	0	0
CL1050.Contig1_All	0	0	0.17	0.68	1.07	0.53
CL1050.Contig21_All	4.12	3.34	2.16	0	0	0
CL1050.Contig22_All	0	0	0.11	5.41	4.52	4.64
CL1050.Contig25_All	0.07	0.07	0	1.92	2.32	1.66
CL1050.Contig26_All	1.5	1.57	1.26	0	0	0
CL1050.Contig28_All	0.17	0.13	0	0.87	1.05	0.7
CL1050.Contig29_All	1.2	1.53	1.28	0.51	0.38	0.35
CL1050.Contig30_All	1.82	1.39	2.02	0.62	0.46	0.45
CL1050.Contig31_All	2.9	2.5	2.29	1.24	0.76	0.86
CL1050.Contig33_All	0.05	0.2	0.05	0	0	0
CL1050.Contig34_All	0.52	0.71	0.3	0	0	0
CL1050.Contig39_All	4.37	4.21	3.65	0.03	0	0
CL1050.Contig40_All	5.93	4.49	7.76	0.02	0	0
CL1050.Contig41_All	1.8	1.04	1.02	0	0	0
CL1050.Contig43_All	1.47	2.08	3.19	0	0	0
CL1050.Contig46_All	2.27	1.9	1.22	0	0	0
CL1050.Contig8_All	0	0	0	2.51	2.87	3.38
CL1050.Contig9_All	2.48	1.89	1.85	0	0	0
CL10500.Contig1_All	4.44	3.92	4.15	0.1	0.18	0.27
CL10500.Contig2_All	4.4	4.56	4.57	6.26	6.43	7.24
CL10501.Contig1_All	0	0	0	29.9	36.78	33.63
CL10501.Contig2_All	3.86	4.5	4.16	16.24	15.91	14.45
CL10501.Contig3_All	14.25	13.18	16.88	24.85	24.58	21.39
CL10501.Contig4_All	20.52	15.93	19.42	86.17	94.96	95.2
CL10502.Contig3_All	2.62	3.1	2.75	3.64	3.54	4.05
CL10504.Contig1_All	2.84	0.96	1.56	0	0	0
CL10505.Contig2_All	0.79	0.32	0.47	0	0	0
CL10506.Contig1_All	0.34	0.02	0.31	1.18	0.85	0.87
CL10506.Contig2_All	0.32	0.17	0.25	0.86	1.03	0.72
CL10506.Contig3_All	1.22	1.13	1.19	0.1	0.24	0.04
CL10506.Contig4_All	1.17	0.8	0.8	0.35	0.63	0.25
CL10506.Contig5_All	0.84	1.09	0.57	2.1	1.87	2.42
CL10507.Contig2_All	1.07	0.9	1.37	3.26	3.45	3.42
CL10507.Contig3_All	0	0	0	2.27	1.73	2.12
CL10508.Contig4_All	1.78	0.45	2.87	0	0.44	0.45
CL10509.Contig2_All	0.27	1.17	0.27	11.8	12.03	11.84
CL10509.Contig3_All	0	0	0	0.56	1.36	1.01
CL1051.Contig10_All	0	0.39	0.21	2.23	1.85	1.73
CL1051.Contig12_All	0	0	0	0.14	0	0.52
CL1051.Contig14_All	0.9	0.92	1.23	0.12	0.24	0
CL1051.Contig15_All	0	0	0	0	0.46	0.23
CL1051.Contig17_All	0.9	0.7	1.12	0.51	0.46	0.49
CL1051.Contig19_All	1.15	1.7	1.39	0.33	0.18	0.11
CL1051.Contig1_All	2.79	2.67	2.37	0.79	0.78	0.75
CL1051.Contig21_All	0	0	0.1	0.77	0.37	0.69
CL1051.Contig23_All	0.51	0.51	0.66	0.03	0.1	0.09
CL1051.Contig25_All	0.03	0.27	0.24	1.37	1.14	1.05
CL1051.Contig27_All	0	0	0	0.02	0.16	0.22
CL1051.Contig28_All	0.78	1.12	0.56	0.21	0	0.14
CL1051.Contig31_All	2.11	1.96	1.55	0.13	0.04	0
CL1051.Contig3_All	0	0	0	0.09	0.3	0.07
CL1051.Contig4_All	0.46	0.47	0.21	0	0.11	0.16
CL1051.Contig5_All	0	0	0	0.33	0.48	0.4
CL1051.Contig6_All	0	0	0.08	0.6	0.81	0.5
CL1051.Contig7_All	1.34	1.2	1.33	2.04	2.05	2.05
CL1051.Contig9_All	0.22	0.11	0.08	1.82	1.28	1.42
CL10510.Contig1_All	0.19	0	0	4.33	5.11	4.92
CL10510.Contig2_All	5.28	5.39	6.54	2.45	3.36	3.39
CL10511.Contig10_All	0.25	0.98	0.79	3.06	3.5	3.23
CL10511.Contig11_All	0	0	0	1.01	0.73	1.19
CL10511.Contig12_All	0	0	0	0.83	0.52	0.23
CL10511.Contig13_All	0	0	0	0.18	0.22	0.43
CL10511.Contig15_All	0.53	0.72	0.68	0	0	0
CL10511.Contig18_All	1.56	1.18	1.16	0.38	0.68	0.18
CL10511.Contig19_All	0.86	0.55	0.75	0.28	0.26	0.25
CL10511.Contig1_All	0	0	0	0	0.45	0.27
CL10511.Contig20_All	0	0	0	0.86	1.22	0.35
CL10511.Contig21_All	1.18	1.01	1.06	0.45	0.2	0.86
CL10511.Contig22_All	0.08	0	0.24	0.52	0.67	0.44
CL10511.Contig23_All	0	0	0	0.51	0.52	0.3
CL10511.Contig25_All	2.28	2.15	2.31	0	0	0
CL10511.Contig29_All	0.42	0.34	0.61	0.17	0	0
CL10511.Contig2_All	0.45	0	0.13	0.61	0.81	1.1
CL10511.Contig30_All	0.1	0	0	0.25	0.36	0.33
CL10511.Contig32_All	0.04	0.12	0.17	0	0	0
CL10511.Contig37_All	0	0	0	0.73	0.4	0.32
CL10511.Contig39_All	0	0.03	0.07	0.58	0.24	0.21
CL10511.Contig7_All	1.37	1.41	1.15	0	0	0
CL10512.Contig1_All	12.95	14.07	11.8	137.92	139.88	136
CL10512.Contig2_All	14.34	13.9	12.32	45.65	51.48	48.82
CL10512.Contig3_All	21.2	19.9	18.06	53.26	55.31	55.99
CL10512.Contig4_All	7.48	7.83	6.88	46.59	52.48	50.55
CL10513.Contig3_All	0.53	0.56	0.49	0.35	0.22	0.35
CL10513.Contig4_All	2.57	1.6	1.72	1.07	0.87	0.96
CL10513.Contig6_All	7.75	8.98	7.71	4.28	4	3.77
CL10514.Contig1_All	0.38	0.5	0.14	2.22	2.37	2.05
CL10514.Contig2_All	22.93	23.1	23.83	38.76	38.21	36.01
CL10515.Contig1_All	47.71	44.19	45	27.64	26.87	26.33
CL10515.Contig2_All	11.96	10.62	12.03	8.06	6.89	9.13
CL10515.Contig3_All	13.21	11.49	12.31	8.22	6.82	8.46
CL10515.Contig4_All	35.21	36.51	38.38	21	20.58	19.92
CL10516.Contig2_All	2.12	2.44	2.3	4.38	3.8	3.74
CL10517.Contig1_All	1.92	2.37	2.32	0.42	0.21	0
CL10517.Contig2_All	0.94	1.34	1.69	0	0.18	0
CL10518.Contig1_All	1.96	2.83	2.2	24.61	23.67	22.57
CL10518.Contig3_All	0.28	0.42	0.34	23.09	25.68	27.31
CL10518.Contig4_All	27.25	29.92	26.7	8.4	8.99	9.21
CL10519.Contig1_All	1.13	1.1	1.14	0.29	0.15	0.22
CL10519.Contig2_All	3.46	3.4	2.84	0.11	0	0.11
CL1052.Contig2_All	0.84	0.65	0.86	3.66	2.88	2.47
CL1052.Contig3_All	1.89	1.83	1.11	3.75	2.97	4.22
CL10520.Contig1_All	0.96	0.73	0.71	4.03	4.23	5.77
CL10520.Contig2_All	6.86	7.9	6.01	10.9	10.58	10.13
CL10520.Contig3_All	6	6.53	4.99	2.56	4.7	3.47
CL10521.Contig2_All	0.53	0.66	0.35	4.04	3.66	3.39
CL10521.Contig3_All	0.26	0.51	0.35	7.15	6.52	7.18
CL10522.Contig2_All	1.35	1.22	1.72	5.43	4.45	3.81
CL10522.Contig3_All	6.54	9.66	8.16	3.97	4.86	4.09
CL10523.Contig2_All	0	0.1	0.1	0.93	0.46	1.58
CL10524.Contig1_All	0	0.57	0.83	5.32	3.94	2.85
CL10526.Contig2_All	6.01	4.82	4.67	0.38	0.15	0.23
CL10527.Contig2_All	62.53	63.16	63.72	12.96	12.85	16.06
CL1053.Contig10_All	7.9	6.25	6.3	13.87	13.52	12.87
CL1053.Contig5_All	0.16	0.14	0.23	2.06	2.45	2
CL1053.Contig9_All	0	0	0.06	0.76	0.56	0.95
CL10530.Contig2_All	8.68	9.57	8.8	3.06	4.18	3.36
CL10531.Contig2_All	1.63	2.69	1.79	0.33	0.08	0
CL10533.Contig1_All	3.02	2.98	3.09	0.08	0.07	0
CL10533.Contig2_All	3.14	3.06	2.92	0.1	0.4	0.62
CL10533.Contig3_All	0.42	0.57	0.56	3.87	4.93	2.95
CL10534.Contig1_All	0	0.26	0	1.88	2.25	1.75
CL10534.Contig2_All	4.32	3.37	2.64	5.79	4.73	4.13
CL10535.Contig2_All	0.36	0.47	1.04	2.32	1.59	3.27
CL10536.Contig1_All	3.69	3.42	3.4	0.55	0.33	0.49
CL10536.Contig2_All	3.2	3.4	3.72	9.31	8.62	8.03
CL10538.Contig1_All	0.33	0.24	0.07	0	0	0
CL10538.Contig2_All	0.87	0.75	1.06	3.78	4.3	4.44
CL1054.Contig2_All	3.43	3.79	3.86	0.24	0	0.59
CL10540.Contig1_All	527.48	546.35	498.15	477.28	482.64	480.14
CL10540.Contig2_All	0.53	0.82	0.38	53.88	56.17	51.78
CL10540.Contig3_All	13.36	10.29	14.32	42.76	40.89	48.9
CL10540.Contig4_All	76.11	79.35	75.35	106.66	102.77	113.55
CL10541.Contig1_All	1.72	1.33	1.47	0.4	0.38	0.24
CL10541.Contig3_All	1.94	2.15	2.14	0.85	1.09	1.16
CL10543.Contig2_All	8.08	9.48	9.26	19.37	21.68	24.08
CL10543.Contig3_All	12.82	12.88	12.7	1.38	1.2	1.24
CL10543.Contig4_All	30.37	31.8	32.1	36.27	39.04	38.73
CL10543.Contig5_All	0.24	0	0	2.77	1.01	1.73
CL10544.Contig1_All	2.86	2.16	1.02	7.77	8.61	8.73
CL10544.Contig3_All	2.9	3.22	3.34	2.66	2.72	2.66
CL10544.Contig5_All	2.21	2.11	2.16	3.39	3.13	3.15
CL10545.Contig1_All	0.33	0.44	0.11	3.1	3.66	2.59
CL10545.Contig2_All	0	0.17	0	1.49	2.33	1.4
CL10545.Contig3_All	0	0	0	1.2	0.82	0.67
CL10546.Contig2_All	2.89	1.52	2.42	0	0	0
CL10547.Contig1_All	0	0.15	0	3.34	3.02	3.68
CL10547.Contig2_All	0.85	0.62	1.13	3.12	3.63	3.57
CL10548.Contig2_All	9.46	8.32	10.34	26.9	22.08	28.11
CL10548.Contig4_All	35.49	31.75	34.2	56.17	55.39	54.29
CL10549.Contig1_All	0.11	0	0.06	3.2	3.55	2.91
CL1055.Contig1_All	0.54	0.64	0.58	2.15	1.53	1.8
CL1055.Contig2_All	3.3	3.66	2.44	10.2	9.89	9.11
CL1055.Contig3_All	0.48	0.85	1.41	0.28	0.44	0.09
CL1055.Contig6_All	31.41	33.44	30.19	12.81	13.48	12.69
CL1055.Contig7_All	0.8	0.73	0.59	1.72	1.93	1.35
CL1055.Contig9_All	1.18	1.09	1.37	0.22	0.29	0.16
CL10551.Contig1_All	2.65	1.72	2.11	0.29	1.02	0.75
CL10551.Contig2_All	3.72	3.88	2.9	1.33	1.75	1.63
CL10551.Contig3_All	3.29	3.21	3.43	4.16	4.45	4.71
CL10551.Contig4_All	5.23	4.97	4.89	0.66	0.71	0.95
CL10553.Contig1_All	1.43	1.61	3.01	0.94	0.62	0.16
CL10553.Contig2_All	2.94	2.98	2.87	1.6	1.32	1.75
CL10556.Contig1_All	0.42	0.84	0.21	2.45	2.43	1.04
CL10558.Contig1_All	1.23	0.72	1.76	0.09	0	0.09
CL10558.Contig2_All	9.41	9.57	8.41	0.1	0.25	0.31
CL10558.Contig3_All	1.62	2.87	1.19	0.4	0	0
CL10559.Contig1_All	1.56	1.29	1.46	13.4	15.37	13.33
CL10559.Contig2_All	17.43	17.83	17.89	2.47	2.76	2.41
CL1056.Contig2_All	1.71	1.73	1.7	0.51	0.65	0.81
CL10560.Contig1_All	0	0	0	7.13	7.43	8.22
CL10560.Contig2_All	6.89	8.49	7.02	0.38	0	0.32
CL10562.Contig1_All	11.31	10.96	10.45	3.01	3.54	3.27
CL10562.Contig3_All	7.28	7.33	7.91	0.97	0.52	0.87
CL10562.Contig4_All	3.79	4	2.95	11.98	10.89	12.07
CL10563.Contig1_All	0	0.07	0	3.79	4.37	4.52
CL10563.Contig2_All	0.71	0.7	0.28	0	0	0
CL10563.Contig3_All	5.11	4.36	3.75	2.08	2.06	1.45
CL10564.Contig10_All	4.12	4.14	3.07	0.39	0.56	0.64
CL10564.Contig1_All	2.59	2.71	1.91	0.22	0.06	0.06
CL10564.Contig3_All	0.13	0	0	1.65	1.7	1.82
CL10564.Contig6_All	4.4	4.17	4.08	0.57	0.33	0.33
CL10564.Contig8_All	0.77	0.39	0.87	3.41	2.27	2.64
CL10567.Contig2_All	3.72	6.85	4.73	1.73	1.32	1.75
CL10567.Contig3_All	1.89	2.08	1.17	0	0	0
CL10568.Contig2_All	0	0	0	1.04	0.73	0.94
CL10568.Contig3_All	0.35	0.41	0	3.17	2.98	3.41
CL10568.Contig4_All	1.17	1.06	1.31	4.45	3.42	3.46
CL10568.Contig5_All	0.11	0	0.26	2.38	2.77	1.59
CL10568.Contig6_All	12.3	12.24	10.21	31.63	36.94	32.28
CL10569.Contig6_All	1.67	1.91	1.96	5.5	6.09	5.28
CL10569.Contig7_All	2.33	3.77	3.23	0.69	0.91	1.63
CL1057.Contig11_All	0.09	0.21	0.2	0	0.09	0
CL1057.Contig12_All	3.15	2.37	2.51	1.85	1.6	1.48
CL1057.Contig13_All	0.65	0.54	0.84	1.83	2.12	1.78
CL1057.Contig14_All	0.9	1.09	1.18	3.38	4.26	4.22
CL1057.Contig2_All	1.93	2.09	1.47	0	0	0
CL1057.Contig3_All	0.46	0.23	0.22	0.97	0.77	1
CL1057.Contig4_All	0.54	0.17	0.71	0	0	0
CL1057.Contig8_All	0.69	0.17	0.26	1.05	0.9	0.66
CL10570.Contig1_All	6.44	5.91	4.63	0	0	0
CL10570.Contig2_All	12.68	13.55	12.77	29.54	28.59	31.06
CL10571.Contig1_All	16.07	15.94	17.68	7.62	7.01	7.68
CL10571.Contig2_All	22.5	21.16	21.91	17.21	15.47	14.94
CL10571.Contig3_All	18.46	21.34	20.4	15.36	14.81	14.71
CL10571.Contig4_All	18.26	17.91	18.02	12.9	11.8	12.95
CL10572.Contig1_All	4.63	4.39	4.63	2.99	2.83	2.69
CL10573.Contig1_All	1.61	1.39	1.85	7.49	6.31	6.55
CL10573.Contig2_All	3.59	3.78	2.96	1.55	1.26	1.17
CL10573.Contig4_All	0.99	1.16	0.73	0.22	0.35	0.18
CL10575.Contig1_All	2.22	2.51	2.6	0.31	0.38	0.26
CL10575.Contig2_All	0.42	0.44	1.03	8.34	9.08	8.91
CL10575.Contig3_All	6.77	8.47	8.13	2.36	2.3	2.2
CL10577.Contig2_All	1.58	1.49	1.93	0.9	0.77	0.61
CL10578.Contig2_All	1.26	1.07	1.76	0.93	0.41	0.46
CL1058.Contig1_All	40.13	38.73	35.51	73.36	76.65	78.89
CL1058.Contig2_All	8.97	8.35	7.49	1.08	0.76	0.7
CL1058.Contig3_All	1.63	1.34	1.11	9.04	9.4	9.14
CL1058.Contig4_All	26.85	25.47	26.29	5.65	7.22	6.44
CL1058.Contig5_All	53.07	49.24	49.49	0	0	0
CL10580.Contig2_All	3.34	2.54	3.69	0	0	0.42
CL10580.Contig3_All	2.13	1.51	1.27	24.53	23.27	30.2
CL10582.Contig1_All	1.37	1.45	1.38	1.08	0.69	0.47
CL10582.Contig2_All	12.78	10.95	11.13	5.76	7.34	5.98
CL10582.Contig3_All	0.32	0.58	0.71	3.26	2.92	3.08
CL10583.Contig1_All	0.92	0.93	0	3.44	2.87	1.65
CL10583.Contig4_All	5.23	4.69	4.39	0	0	0
CL10584.Contig1_All	21.28	18.7	21.74	26.21	28.98	29.68
CL10584.Contig2_All	32.03	34.35	32.09	7.72	7.61	7.18
CL10586.Contig1_All	0.69	0.93	0.46	2.44	2.4	1.82
CL10587.Contig1_All	21.56	21.86	22.74	18.01	17.79	18.28
CL10587.Contig2_All	21.72	22.59	21.58	16.35	18.61	16.4
CL10589.Contig3_All	2.73	2.19	1.36	0.11	0.11	0
CL10589.Contig4_All	0.6	0.81	0.64	1.95	1.9	1.78
CL1059.Contig1_All	6.65	6.32	6.07	91.6	95.82	92.93
CL1059.Contig2_All	33.87	35.44	33.36	26.12	24.09	26.91
CL10591.Contig1_All	0.09	0.25	0.35	0	0	0.08
CL10591.Contig3_All	6.47	6.62	6.67	4.12	3.27	3.71
CL10592.Contig1_All	4.95	6.01	5.03	1.82	2.35	3.44
CL10592.Contig2_All	5.37	4.4	4.41	7.09	6.93	7.45
CL10594.Contig1_All	6.41	9.01	7	15.19	13.7	14.07
CL10594.Contig3_All	5.73	6.57	8.07	1.88	1	1.1
CL10595.Contig2_All	3.28	3.68	4.28	13.75	14.21	13.43
CL10595.Contig4_All	0.31	0.26	0.28	6.05	7.75	7
CL10595.Contig5_All	0.88	0.44	0.44	3.64	2.12	3.04
CL10595.Contig6_All	5.32	4.72	4.67	0.44	0.22	0.58
CL10596.Contig1_All	5.07	2.87	3.9	2.28	2.99	2.73
CL10596.Contig2_All	0.11	0.21	0.26	7.34	7.27	6.84
CL10596.Contig3_All	1.43	2.45	2.65	0.95	0.99	0.88
CL10596.Contig4_All	1.12	1.92	1.74	0.05	0.14	0
CL10598.Contig1_All	0.13	0	0	1.57	1.56	0.8
CL10599.Contig2_All	0.89	0.83	1.09	2.72	2.97	2.62
CL10599.Contig3_All	10.1	10.59	9.3	3.44	4.31	3.1
CL106.Contig11_All	0.04	0	0.21	7.99	9.21	9.96
CL106.Contig18_All	1.76	1.97	2.37	0.07	0	0
CL106.Contig19_All	1.13	1.04	0.55	1.64	1.88	1.75
CL106.Contig1_All	2.3	2.8	1.83	7.18	8.46	7.69
CL106.Contig20_All	0.1	0.09	0.24	2.19	1.64	1.38
CL106.Contig23_All	3.5	3.44	2.72	0	0	0
CL106.Contig24_All	2.8	2.78	2.61	0.07	0.42	0.48
CL106.Contig25_All	0.33	0	0.15	1.17	4.46	1.93
CL106.Contig26_All	18.42	18.68	19.36	34.19	39.63	39.68
CL106.Contig27_All	0.6	0.61	0.18	3.69	2.84	1.98
CL106.Contig29_All	1.18	2.88	2.26	35.1	36.89	40.46
CL106.Contig2_All	0	0	0	1.17	0.87	1.55
CL106.Contig30_All	0	0	0	7.24	7.81	7.61
CL106.Contig31_All	0	0	0.06	0.33	0.38	0.08
CL106.Contig32_All	0.35	0.42	0	3.48	5.08	3.12
CL106.Contig33_All	17.3	14.23	20.51	21.69	22.98	26.29
CL106.Contig34_All	2.17	2.12	2.4	6.95	9.12	8.67
CL106.Contig35_All	1.09	1.05	1.42	0	0	0
CL106.Contig37_All	16.36	13.79	12.42	24.86	25.85	24.56
CL106.Contig3_All	0	0.16	0.14	8.54	13.99	15.97
CL106.Contig5_All	2.25	2.42	2.16	0.08	0.08	0.17
CL106.Contig6_All	0	0	0	0.38	0.82	0
CL106.Contig7_All	1.88	1.73	1.05	0	0	0
CL106.Contig9_All	0.67	0.42	0.67	0.12	0.13	0
CL1060.Contig12_All	0.82	0.5	1.38	0.09	0.12	0.1
CL1060.Contig14_All	0	0	0.04	5.38	6.37	5.3
CL1060.Contig16_All	4.93	4.9	5.43	1.78	1.68	1.54
CL1060.Contig17_All	12.16	13.18	14.09	29.11	30	30.24
CL1060.Contig18_All	0	0	0	1.83	1.55	1.02
CL1060.Contig19_All	0	0	0.06	1.77	0.9	0.92
CL1060.Contig1_All	1.64	1.89	1.16	0.78	0.86	0.7
CL1060.Contig20_All	0	0	0	3.14	3.46	4.27
CL1060.Contig21_All	1.62	1.26	1.82	0.18	0.13	0.64
CL1060.Contig2_All	0.75	0.7	1.25	0.13	0.25	0.15
CL1060.Contig3_All	0.22	0.33	0.25	5.4	4.24	5.58
CL1060.Contig4_All	2.24	1.61	1.2	0.84	0.73	1.07
CL1060.Contig5_All	0.59	0.72	0.79	0.3	0.29	0.54
CL1060.Contig6_All	7.17	7.23	7.65	10.79	11.97	11.3
CL1060.Contig8_All	2.51	2.63	2.53	0.58	0.74	0.83
CL1060.Contig9_All	1.54	1.21	1.63	0.56	0.56	0.6
CL10600.Contig1_All	13.25	10.63	11.68	5.34	4.59	4.28
CL10600.Contig5_All	0.37	0.36	0.13	6.9	8.37	6.11
CL10601.Contig3_All	1.79	1.58	1.31	0	0	0
CL10601.Contig4_All	1.64	1.77	2.2	6.89	6.81	6.44
CL10601.Contig5_All	5.16	5.91	4.05	3.41	3.35	2.91
CL10602.Contig1_All	0.07	0.05	0.13	2.18	2.29	2.01
CL10602.Contig2_All	0.15	0.06	0.2	2.22	1.34	2.14
CL10602.Contig3_All	3.83	3.54	3.15	0.88	0.92	1.1
CL10603.Contig1_All	4.28	5.16	4.48	6.32	6.96	7.16
CL10603.Contig3_All	6.9	7.33	6.23	10.28	10.96	10.51
CL10604.Contig1_All	1.43	1.56	0.89	0	0.15	0.12
CL10604.Contig2_All	23.45	21.29	14.47	11.3	11.99	14.43
CL10605.Contig1_All	0.12	0.05	0	0.86	0.54	0.13
CL10605.Contig2_All	0.1	0.32	0.26	3.84	4.32	4.39
CL10606.Contig1_All	3.18	3.89	2.77	0	0	0
CL10606.Contig2_All	9.99	7.46	8.16	0.47	0.24	0.52
CL10606.Contig3_All	2.94	2.87	3.12	5.2	4.52	5.36
CL10606.Contig4_All	0.68	0.66	0.97	2.15	1.77	1.16
CL10607.Contig2_All	2.59	1.13	2.18	0	0	0
CL10608.Contig1_All	0	0	0	3.16	1.57	1.99
CL10609.Contig1_All	22.14	23.75	24.71	31.8	32.02	29.82
CL10609.Contig2_All	1.39	1.82	1.35	0	0.17	0
CL10609.Contig3_All	3.81	3.73	3.4	15.35	15.43	14.41
CL10609.Contig4_All	12.48	11.33	11.17	6.16	6.69	4.88
CL10609.Contig5_All	4.62	4.04	4.05	0.15	0.23	0.33
CL10610.Contig1_All	0.89	0.97	0.71	1.57	1.9	4.95
CL10610.Contig2_All	3.25	3.24	5.21	0.14	0.27	0.42
CL10610.Contig4_All	0	0.39	0	4.74	3.95	3.85
CL10611.Contig5_All	0.5	0.5	0.25	2.89	1.7	2.49
CL10611.Contig6_All	2.64	1.65	2.7	0	0	0
CL10613.Contig4_All	1.63	1.89	2.31	0	0	0
CL10613.Contig5_All	0.48	0.32	0.25	0.67	0.81	0.6
CL10614.Contig1_All	1.28	1.91	1.21	4.53	5.4	4.59
CL10614.Contig3_All	0.95	1.24	1.15	0	0	0
CL10615.Contig2_All	62.08	62.87	59.69	70.22	68.15	73.89
CL10616.Contig1_All	0	0	0	0.21	1.07	0.72
CL10616.Contig2_All	0	0	0.08	0.24	0.18	0.19
CL10616.Contig3_All	0.12	0.21	0.08	0.73	0.57	0.82
CL10617.Contig3_All	4.4	4.1	3.56	7.45	7.7	6.62
CL10617.Contig4_All	5.01	4.46	4.62	0.53	0.69	0.53
CL10618.Contig2_All	0.62	0.27	0.53	1.56	2.06	1.75
CL10619.Contig1_All	0.58	0.73	0.87	4.69	3.88	5.48
CL1062.Contig2_All	9.26	9.29	11.64	14.06	15.56	16.87
CL1062.Contig3_All	66.1	66.8	77.69	39.74	39.32	38.58
CL10620.Contig2_All	5.89	4.69	4.07	2.56	1.79	2.07
CL10621.Contig1_All	0.78	0.79	0.19	0	0	0
CL10621.Contig2_All	5.98	6.19	5.82	3.6	3.47	3.15
CL10621.Contig3_All	0.18	0.25	0.19	0	0	0
CL10621.Contig4_All	2.68	1.99	2.77	4.67	4.77	4.15
CL10622.Contig1_All	0.27	0.54	0.53	4.03	2.96	3.16
CL10623.Contig2_All	0	0	0.21	2.37	2.84	2.38
CL10623.Contig3_All	1.24	1.05	1.34	2.03	2.46	2.19
CL10623.Contig4_All	3.26	3.35	3.08	0.22	0.2	0.07
CL10624.Contig1_All	3.82	4.16	4.08	10.83	10.84	10.75
CL10624.Contig2_All	7.82	7.12	7.45	1.83	1.24	1.58
CL10625.Contig2_All	0	0	0	0.69	1.07	1.03
CL10626.Contig1_All	0.53	1.03	0.92	5.54	6.1	7.58
CL10626.Contig2_All	12.79	12.16	12.58	2.66	2.52	3.12
CL10626.Contig3_All	12.85	14.79	13.07	3.4	3.24	3.19
CL10627.Contig1_All	0.49	0.49	0.91	0	0	0.14
CL10628.Contig3_All	5.48	5.52	4.58	7.69	7.67	7.43
CL10628.Contig4_All	11.2	11.34	11.02	5.8	4.58	5.02
CL10628.Contig6_All	2.4	2.51	2.8	1.99	1.64	1.71
CL10629.Contig1_All	3.1	2.96	2.78	0	0	0
CL1063.Contig2_All	2.25	2.76	2.88	4.5	3.96	4.52
CL1063.Contig4_All	3.46	3.78	3.88	2.05	2.36	2.38
CL10630.Contig2_All	3.01	2.4	1.7	1.2	1.12	1.31
CL10632.Contig2_All	4.37	4.44	4.59	2.26	2.5	2
CL10633.Contig2_All	0.61	0.42	0.19	2.96	2.57	2.27
CL10633.Contig3_All	3.03	4.49	4.08	1.56	1.85	1.55
CL10634.Contig1_All	9.82	10.19	9.42	30.48	31.43	33.95
CL10634.Contig2_All	6.14	5.47	4.69	0.81	0.5	1.22
CL10634.Contig3_All	19.97	18.36	18.38	35.99	38.88	37.87
CL10635.Contig1_All	0	0	0	4.54	2.7	3.37
CL10636.Contig1_All	2.34	2.47	2.24	0.52	0.39	0.43
CL10636.Contig2_All	0	0	0	6.76	6.73	6.9
CL10636.Contig3_All	0.33	0.17	0.18	2.3	2.53	2
CL10636.Contig4_All	4.24	4.77	4.38	0.47	0.55	0.86
CL10636.Contig5_All	4.52	4.31	4.04	1.03	0.71	0.65
CL10637.Contig1_All	0.52	0.81	0.6	0	0	0
CL10637.Contig2_All	3.69	4.39	2.4	1.26	2.34	1.44
CL10638.Contig2_All	3.39	3.6	3.16	0.11	0.38	0.45
CL10639.Contig1_All	6.09	7.63	6.5	5.05	5.85	5.12
CL10639.Contig2_All	2.94	2.35	2.59	4.85	4.25	3.43
CL1064.Contig2_All	0.49	0	0.21	1.39	1.63	2.02
CL10640.Contig1_All	0.97	1.22	0.84	3.31	1.64	3.36
CL10640.Contig2_All	2.22	2.38	2.28	0	0	0
CL10641.Contig1_All	0	0	0	4.89	5.47	4.24
CL10641.Contig2_All	3.04	3.08	2.77	0.97	0.94	1.43
CL10641.Contig3_All	0.99	1.42	1.33	3.82	4.14	3.69
CL10642.Contig2_All	3.69	2.61	2.8	6.25	5.99	6.34
CL10643.Contig1_All	0.12	0	0	1.37	1.36	2.12
CL10644.Contig2_All	1.2	1.75	0.93	0	0	0
CL10645.Contig1_All	14.68	16.79	14.96	0	0	0
CL10645.Contig2_All	3.72	4.28	3.37	14.37	14.75	14.12
CL10647.Contig1_All	14.25	16.49	14.51	19.74	18.65	18.18
CL10647.Contig2_All	0	0	0	0	0.78	0.95
CL10649.Contig5_All	0.03	0	0	3.59	3.54	4.07
CL1065.Contig3_All	7.33	8.84	6.96	0	0	0
CL1065.Contig4_All	0	0	0	0.71	0.32	0
CL1065.Contig5_All	1.16	0.52	0.35	16.85	18.07	20.57
CL1065.Contig6_All	0	0	0	6.55	7.76	6.32
CL1065.Contig7_All	0.39	0.46	0.48	0	0	0
CL1065.Contig8_All	0	0	0.08	7.72	7.91	6.96
CL1065.Contig9_All	4.27	4.73	3.69	0.88	1.71	0.29
CL10650.Contig1_All	1.89	2.43	1.88	0.84	1.21	1.19
CL10650.Contig2_All	0.99	0.86	0.52	2.71	2.01	2.07
CL10652.Contig1_All	0.05	0	0	1.47	1.05	1.27
CL10652.Contig2_All	9.44	9.41	10.32	8.37	7.97	7.91
CL10652.Contig3_All	0	0.2	0	0.73	0.84	0.96
CL10653.Contig1_All	0	0	0.7	2.11	3.15	1.43
CL10654.Contig1_All	1.26	1.06	2.9	0	0	0.21
CL10655.Contig1_All	6.23	5.46	5.76	1.83	1.7	2.24
CL10655.Contig2_All	12.32	12.95	12.33	6.82	7.02	6.29
CL10656.Contig1_All	7.65	8.12	6.85	3.77	3.79	3.47
CL10656.Contig3_All	2.19	3.08	2.85	8.36	7.32	7.91
CL10656.Contig4_All	2.65	3.19	3.37	11.54	11.89	11.52
CL10657.Contig1_All	4.04	4.37	4.54	0.19	0.14	0.3
CL10657.Contig2_All	10.62	12.28	12.76	5.5	5.13	4.61
CL10658.Contig2_All	2.11	2.39	2.18	1.09	1.67	1.59
CL10659.Contig1_All	0	0	0	0.51	0.86	0.9
CL10659.Contig3_All	3.88	3.31	3.08	6.04	5.89	5.2
CL10660.Contig1_All	0.35	0	0.24	2.91	2.35	2.82
CL10660.Contig2_All	3.56	3	2.75	0.29	0.29	0.63
CL10661.Contig1_All	2.05	2.12	1.44	0.55	0.59	0.52
CL10662.Contig1_All	0	0	0	4.65	4.09	4.76
CL10662.Contig2_All	3.53	3.26	2.71	0.2	0.3	0.62
CL10662.Contig3_All	0.25	0.23	0.12	0	0	0
CL10664.Contig1_All	7.86	8.92	10.83	12.66	14.97	12.59
CL10665.Contig2_All	0	0	0	4.28	4.08	3.55
CL10665.Contig4_All	3.75	3.01	3.1	1.88	1.92	2.14
CL10666.Contig1_All	0.68	1.38	1.68	0	0	0
CL10666.Contig2_All	0	0.22	0.43	1.7	2.73	4.3
CL10667.Contig2_All	2.76	3.09	2.77	7.2	8.23	7.04
CL10667.Contig3_All	3.38	4.01	3.97	0	0	0
CL10669.Contig1_All	0.37	0.56	0.37	5.63	4.68	5.72
CL10669.Contig2_All	6.29	5.83	4.29	0	0	0.35
CL1067.Contig10_All	0.83	0.86	0.97	0.15	0.41	0.29
CL1067.Contig3_All	1.89	2.06	2.11	0.7	1.28	0.6
CL1067.Contig4_All	0	1.36	1.13	5.92	8.37	6.5
CL1067.Contig6_All	3.84	2.96	3.46	0.15	0	0.02
CL1067.Contig7_All	1.38	1.61	1.15	3.34	3.91	4.12
CL1067.Contig8_All	0.39	0.14	0.99	0.2	0	0
CL10672.Contig1_All	22.09	23.61	20.92	283.28	278.14	262.88
CL10672.Contig2_All	0	0	0	2.28	2.71	3
CL10672.Contig3_All	6.6	7.52	6.27	153.81	145.43	144.42
CL10672.Contig4_All	119.61	118.67	115.5	18.51	19.58	21.26
CL10673.Contig1_All	1.7	1.38	1.06	0.29	0.31	0.62
CL10673.Contig5_All	1.78	1.91	1.95	2.82	3.12	2.29
CL10674.Contig2_All	1.55	1.52	1.12	5.46	5.39	5.92
CL10674.Contig3_All	6.67	5.33	5.82	1.41	1.82	1.48
CL10675.Contig1_All	19.47	13.98	17.45	5.74	5.03	5.5
CL10675.Contig2_All	25.55	26.72	27.09	41.29	40.56	42.11
CL10675.Contig3_All	37.04	42.37	40.13	48.83	49.72	50.95
CL10675.Contig4_All	9.24	9.29	8.06	52.02	47.37	46.52
CL10676.Contig1_All	4.23	4.49	3.5	2.22	0.7	1.33
CL10677.Contig1_All	0	0	0	2.43	1.81	1.95
CL10678.Contig2_All	0.42	0.75	0.21	2.59	2.57	2.63
CL10678.Contig3_All	0.51	0.29	0.45	0.88	1.42	1.11
CL10679.Contig1_All	16.25	15.02	15.91	17.83	20.49	19.78
CL10679.Contig2_All	29.4	26.97	25.45	16.67	18.37	17.87
CL1068.Contig5_All	0.64	0.76	1.05	2.42	1.54	2.67
CL10680.Contig1_All	13.63	14.87	14.81	24.65	26.66	26.54
CL10680.Contig2_All	13.49	11.61	12.08	9.25	10.19	11.11
CL10680.Contig3_All	1.01	0.94	0.75	6.3	6.94	6.66
CL10680.Contig4_All	6.92	7.29	7.93	9.82	11.17	12.55
CL10682.Contig1_All	4.43	3.53	4.37	2.57	1.95	3.56
CL10682.Contig2_All	4.15	6.19	5.41	2.51	3.06	1.97
CL10683.Contig2_All	0	0	0.38	0.77	3.44	1.94
CL10684.Contig2_All	2.3	2.82	1.89	1.18	1.8	1.19
CL10684.Contig3_All	0.98	2.47	2.1	0	0.58	0.32
CL10684.Contig4_All	2.5	2.29	3.02	0.5	0.12	0.52
CL10684.Contig5_All	2.33	2.64	2.33	4.59	4.46	4.11
CL10686.Contig1_All	0.38	0.62	0.51	1.33	1.33	1.05
CL10686.Contig2_All	11.67	13.69	13.31	7.33	6.72	9.27
CL10687.Contig2_All	2.27	1.85	1.46	3.21	3.74	2.78
CL1069.Contig1_All	3.31	3.9	3.83	6.63	6.39	6.13
CL1069.Contig2_All	1.61	0.9	1.76	17.75	17.51	16.62
CL1069.Contig3_All	8.27	8.07	7.54	12.14	12.18	11.75
CL1069.Contig4_All	9.29	10.24	9.72	7.33	7.29	7.75
CL1069.Contig5_All	26.95	25.19	25.23	9.34	8.96	9.63
CL10690.Contig2_All	2.6	2.08	2.14	0.21	0.12	0.21
CL10691.Contig1_All	0.57	0.69	0.49	4.08	2.66	2.93
CL10691.Contig2_All	0.11	0	0	19.57	20.89	19.1
CL10691.Contig4_All	1.84	1.86	1.57	0.3	0.29	0.18
CL10692.Contig1_All	1.06	1.07	1.04	0	0	0
CL10692.Contig2_All	0.23	0.35	0.35	1.6	1.02	0.69
CL10693.Contig1_All	4.24	4.15	4.31	2.22	2.01	1.88
CL10699.Contig1_All	2.6	3.65	3.81	0	0	0
CL10699.Contig2_All	0.68	1.16	1.4	0	0	0
CL107.Contig10_All	209.84	204.72	213.39	11.42	11.06	11.67
CL107.Contig12_All	954.34	931.01	903.17	745.04	738.9	747.17
CL107.Contig13_All	10.67	11.02	10.63	18.02	15.76	18.45
CL107.Contig15_All	436.88	405.61	423.8	228.06	213.98	228.29
CL107.Contig16_All	7.09	6.31	7.6	19.49	20.02	18.26
CL107.Contig17_All	45.35	46.64	47.1	166.1	160.06	166.08
CL107.Contig18_All	26.08	23.65	21.57	169.17	165.28	159.08
CL107.Contig19_All	140.19	145.45	140.88	153.65	152.47	152.82
CL107.Contig20_All	5.61	4.68	5.25	47.26	45.05	49.83
CL107.Contig21_All	15.42	15.87	14.92	45.32	43.11	46.52
CL107.Contig22_All	81.3	80.51	79.87	98.6	94.18	96.62
CL107.Contig23_All	57.97	58.63	61.51	102.81	105.61	105.55
CL107.Contig24_All	46.07	42.84	43.57	84.1	81.06	82.9
CL107.Contig25_All	616.46	606.58	607.33	209.94	195.7	212.02
CL107.Contig26_All	12.28	14.4	13.21	34.64	29.69	32.87
CL107.Contig27_All	2.55	2.49	2.54	17.2	17.12	16.16
CL107.Contig28_All	3.81	4.1	4.33	5.52	5.28	5.99
CL107.Contig2_All	1041.43	1093.53	1120.58	76.61	75.99	86.87
CL107.Contig30_All	4.56	3.08	4.5	0	0	0
CL107.Contig3_All	454.23	434.22	438.88	270.76	266.96	275.61
CL107.Contig5_All	30.87	33.89	32.42	21.37	22.48	23.74
CL107.Contig6_All	113.12	114.43	115.47	91.49	90.4	88.85
CL107.Contig7_All	70.33	68.5	73	38.56	35.89	37.73
CL107.Contig8_All	65.19	61.75	66.01	127.01	132.71	138.16
CL107.Contig9_All	0.13	0.22	0.2	0.48	0.57	0.65
CL1070.Contig1_All	2.72	3.7	3.43	2.03	1.77	1.28
CL1070.Contig2_All	0.23	0.53	0.45	0.81	1.05	1.34
CL10702.Contig2_All	1.43	3.14	0.94	0	0	0
CL10703.Contig2_All	1.82	2.03	1.21	4.03	4.21	3.36
CL10704.Contig2_All	4.78	4.83	4.43	3.03	3.37	3.83
CL10705.Contig1_All	0.94	0.68	0.27	0.07	0.06	0
CL10706.Contig1_All	1.63	2.02	2.34	0	0	0.18
CL10706.Contig2_All	29	25.3	27.64	21.4	25.63	23.33
CL10706.Contig3_All	89.02	92.83	93.18	71.32	72.35	77.1
CL10707.Contig1_All	14.7	20.08	15.36	0	0	0
CL10707.Contig2_All	8.48	7.46	7	0	0	0
CL10707.Contig3_All	1.05	1.42	0.82	0	0	0
CL10707.Contig4_All	5.71	5.21	5.5	0	0	0
CL1071.Contig1_All	5.09	4.92	4.97	0	0.1	0
CL1071.Contig2_All	0.28	0.14	0.29	0	0.03	0
CL1071.Contig3_All	0.16	0.19	0.15	0	0	0
CL1071.Contig4_All	6.76	4.82	6.03	0	0	0
CL1071.Contig5_All	0.33	0.41	0.09	0	0	0
CL1071.Contig7_All	1.38	0.67	1.47	12.05	12.06	12.8
CL1071.Contig9_All	5.53	5.84	6.59	1.79	1.96	1.66
CL10710.Contig3_All	1.41	1.6	1.82	1.13	1.11	0.75
CL10713.Contig1_All	15.51	16.05	18.01	4.26	4.47	3.82
CL10713.Contig2_All	2.78	3.47	3.09	14.59	13.5	12.6
CL10714.Contig1_All	0.78	0.2	0.26	3.74	3.35	3.36
CL10714.Contig2_All	1.16	0.97	0.92	1.89	2.77	2.02
CL10715.Contig1_All	4.43	3.93	4.2	0.29	0.18	0.33
CL10715.Contig2_All	3.15	2.74	2.65	4.69	5.2	4.5
CL10716.Contig1_All	1	1.01	1.74	0	0	0.12
CL10718.Contig1_All	1.54	1.93	1.18	4.17	3.77	2.34
CL1072.Contig2_All	3.15	2.04	3.12	0	0	0
CL1072.Contig4_All	1.12	1.08	0.96	0.26	0.06	0.07
CL1072.Contig5_All	2.95	2.84	3.03	7.21	7.6	6.68
CL1072.Contig6_All	3.55	4.17	3.74	0	0	0
CL10720.Contig2_All	2.17	1.84	1.11	3.09	2.93	3.57
CL10721.Contig12_All	0.4	0.53	0.3	1.45	0.92	1.25
CL10721.Contig13_All	0	0	0.46	3.6	8.01	7.27
CL10721.Contig14_All	8.68	7.71	6.82	0	0	0
CL10721.Contig15_All	0.7	0.63	0.9	0.13	0.11	0.07
CL10721.Contig16_All	1.47	1.21	1.67	0.06	0.14	0.29
CL10721.Contig17_All	0	0.05	0.17	2.89	4.77	2.78
CL10721.Contig18_All	0.25	0.69	0.44	0	0.2	0
CL10721.Contig19_All	1.49	1.22	0.93	0	0.11	0
CL10721.Contig22_All	0.26	0.11	0.11	1.81	0.97	0.89
CL10721.Contig23_All	1.33	1.26	1.14	0.22	0.16	0.13
CL10721.Contig25_All	0.4	0.65	0.63	0	0	0
CL10721.Contig29_All	0	0	0.05	2.86	2.14	2.53
CL10721.Contig30_All	0.73	0.97	1.21	0.2	0.34	0.36
CL10721.Contig31_All	0.05	0.04	0	0.81	0.45	0.92
CL10721.Contig32_All	6.51	6.67	6.79	0.05	0.22	0.08
CL10721.Contig34_All	3.96	3.79	3.97	2.58	1.97	2.01
CL10721.Contig35_All	1.15	0.65	0.93	0	0	0
CL10721.Contig3_All	0	0	0	0.79	1.64	1.31
CL10721.Contig42_All	0.37	0.31	0.24	0.02	0.02	0
CL10721.Contig45_All	3.61	3.15	3.49	0.1	0	0
CL10721.Contig46_All	0	0	0	2.7	1.7	0.98
CL10721.Contig47_All	2.76	3	2.35	0.71	0.82	0.75
CL10721.Contig49_All	0.17	0	0.06	1.63	2.32	1.46
CL10721.Contig5_All	0.01	0	0	3.63	2.76	2.27
CL10721.Contig8_All	0.64	0.55	0.52	3.37	0.62	2.34
CL10721.Contig9_All	0.01	0	0.15	0.44	0.43	0.52
CL10722.Contig1_All	2.53	3.02	2.18	0.06	0	0
CL10723.Contig1_All	6.54	6.25	5.69	0	0	0
CL10723.Contig2_All	0.55	0.43	0.54	0	0.07	0
CL10724.Contig2_All	24.03	24.17	24.63	5.77	6.97	7.04
CL10724.Contig5_All	0	0.29	0	8.19	9.45	9.02
CL10726.Contig2_All	11.45	11.32	12.49	7.94	7.31	7.73
CL10728.Contig2_All	5.36	5.63	4.7	2.01	2.32	2.73
CL10728.Contig3_All	3.25	3.44	3.72	5.38	5.56	5.2
CL10729.Contig1_All	17.57	19.38	20.11	11.23	11.61	10.76
CL10729.Contig2_All	16.67	17.39	14.84	6.18	6.24	7.12
CL10729.Contig3_All	8.95	9.51	10.4	5.29	4.3	3.54
CL10729.Contig5_All	6.24	5.65	4.17	2.53	2.15	2.17
CL1073.Contig1_All	3.82	3.64	3.13	4.46	4.32	4.95
CL1073.Contig5_All	2.27	2.27	2.38	1.42	1.87	1.92
CL1073.Contig6_All	4.03	3.85	3.85	4.88	4.32	5.18
CL10730.Contig1_All	4.76	3.9	3.17	2.13	2.31	2.82
CL10730.Contig4_All	24.84	25.14	26.45	18.97	18.56	17.94
CL10733.Contig1_All	2.57	1.4	0.98	0	0.19	0
CL10734.Contig10_All	15.91	15.28	17.32	20.34	21.29	21.05
CL10734.Contig11_All	0	0	0	1.94	3.23	0.65
CL10734.Contig2_All	29.38	32.26	31.51	4.06	4.58	4.69
CL10734.Contig4_All	35.56	36.45	35.3	47.01	44.27	48.11
CL10734.Contig5_All	274.1	282.62	267.67	242.09	249.92	249.09
CL10734.Contig6_All	0.95	0.86	1.15	7.54	7.1	7.37
CL10734.Contig7_All	71.31	70.77	71.18	52.18	59.78	55.09
CL10734.Contig8_All	0.94	0.6	0.53	0	0	0
CL10734.Contig9_All	0.95	1.24	1.34	0	0	0.07
CL10735.Contig2_All	0.14	0.29	0.25	2.54	2.52	3.35
CL10735.Contig3_All	7.78	9.03	7.69	6.63	5.82	6.14
CL10736.Contig1_All	2.98	4.05	4.06	16.33	14.13	16.32
CL10736.Contig2_All	24.82	25.75	23.35	3.76	4.27	3.77
CL10737.Contig2_All	2.36	2.77	3.74	1.7	1.41	1.25
CL1074.Contig10_All	22.89	17.72	22.63	14.27	15.3	15.16
CL1074.Contig11_All	0.25	0.29	0.42	2.08	1.41	1.47
CL1074.Contig14_All	3.11	3.61	2.33	1.11	1.5	1.98
CL1074.Contig16_All	31.66	25.67	23.79	60.57	65.07	63.25
CL1074.Contig17_All	6.7	9.84	13.57	2.68	3.83	1.59
CL1074.Contig18_All	3.33	4.03	3.59	1.2	0.28	0.51
CL1074.Contig1_All	0	0.11	0	0.75	0.63	1.06
CL1074.Contig21_All	21.41	20.36	21.34	26.31	23.08	26.55
CL1074.Contig22_All	0	0	0	0.17	0.38	0.73
CL1074.Contig23_All	40.39	43.49	41.88	70.03	68.59	64.37
CL1074.Contig25_All	2.31	2.34	2.3	0	0	0.12
CL1074.Contig29_All	0.03	0	0	1.05	0	0.71
CL1074.Contig3_All	3.57	4.24	3.81	0	0	0
CL1074.Contig4_All	7.95	7.43	6.77	4.33	6.25	4.95
CL1074.Contig6_All	1.45	1.75	1.34	0.14	0	0.34
CL1074.Contig7_All	0.06	0.12	0.18	1.99	2.8	1.9
CL1074.Contig8_All	0.27	0.23	0.34	2.39	1.42	1.49
CL10740.Contig1_All	18.99	17.99	17.48	1.03	1.41	2.02
CL10740.Contig2_All	16.36	15.25	15.5	22.31	24.74	24.59
CL10741.Contig1_All	1.32	2.69	1.55	0.08	0.22	0.08
CL10741.Contig2_All	2.75	3.2	3.56	0.2	0.3	0
CL10741.Contig3_All	0.66	1.43	1.09	0.29	0	0.19
CL10741.Contig4_All	2.38	3.02	2.82	4.48	4.2	3.8
CL10742.Contig1_All	3.18	3.42	3.79	7.51	10.28	9.71
CL10742.Contig2_All	10.22	9.76	11.18	2.74	2.36	3.68
CL10742.Contig4_All	1.25	1.49	1.28	3.38	3.32	4.42
CL10743.Contig6_All	0.86	1.74	0.66	4.24	3.38	3.17
CL10744.Contig1_All	7.07	12.08	8.78	0	0	0
CL10748.Contig1_All	8.62	8.63	9.08	0.31	0.6	0.39
CL10748.Contig2_All	0.38	0.08	0.15	2.82	2.89	2.83
CL10749.Contig1_All	3.32	2.61	2.48	13.21	15.05	17.54
CL10749.Contig2_All	14.83	15.99	12.79	3.85	3.47	5.19
CL1075.Contig12_All	0.64	0.77	0.54	0	0	0
CL1075.Contig15_All	1.13	1.34	0.78	9.89	10.28	10.65
CL1075.Contig17_All	0.24	0	0.13	0.42	1.79	1.32
CL1075.Contig18_All	4.31	3.54	4.12	0.49	1.08	0.88
CL1075.Contig1_All	2.53	2.67	4.2	0.19	0.19	0
CL1075.Contig20_All	0	0	0	1.27	1.33	1.23
CL1075.Contig21_All	0.92	0.88	0.97	0.02	0.05	0.02
CL1075.Contig23_All	0.8	1.49	1.44	0	0	0
CL1075.Contig24_All	0.22	0.2	0.06	0	0	0
CL1075.Contig26_All	0.07	0.2	0.16	1.73	1.11	0.89
CL1075.Contig27_All	0.54	0.25	0.67	0	0.03	0.05
CL1075.Contig2_All	0.14	0	0.43	1.52	1.08	1.2
CL1075.Contig32_All	1.24	1.45	1.23	0.07	0.17	0.05
CL1075.Contig33_All	0.57	0.68	0.85	0	0	0
CL1075.Contig34_All	0.04	0	0.05	0.17	0.4	0.54
CL1075.Contig35_All	0.04	0.07	0	0.91	0.83	0.69
CL1075.Contig36_All	1.61	1.51	2.12	0	0	0
CL1075.Contig39_All	0.59	0.45	0.27	2.09	1.99	1.68
CL1075.Contig41_All	0.82	1.1	1.18	6.91	6.48	5.78
CL1075.Contig42_All	0.32	0.23	0.12	0.31	0.72	0.51
CL1075.Contig44_All	0	0	0	0.27	0	1.52
CL1075.Contig47_All	0.77	0.59	0.28	0	0	0
CL1075.Contig4_All	0	0	0	2.06	1.9	1.78
CL10750.Contig1_All	3.53	2	2.95	0	0	0
CL10750.Contig2_All	8.79	8.76	10.13	4.92	3.92	3.88
CL10750.Contig5_All	1.01	1.7	2.64	0	0	0
CL10751.Contig1_All	31.2	27.96	31.74	3.15	5.29	7.3
CL10751.Contig2_All	6.87	5.96	4.88	25.01	26.32	30.14
CL10751.Contig3_All	17.73	17.36	17.31	23.56	23.09	25.75
CL10752.Contig2_All	70.98	76.55	79.9	95.84	100.68	104.79
CL10753.Contig1_All	0	0	0	1.1	1.08	0.54
CL10753.Contig2_All	0	0	0	3.26	3.23	1.65
CL10753.Contig3_All	0	0	0	0.43	0.44	0.73
CL10753.Contig4_All	0.38	0.49	0.49	3.48	3.48	3.17
CL10753.Contig5_All	0	0	0	0.44	1.72	1.99
CL10753.Contig6_All	0	0	0	1.61	0.24	0
CL10753.Contig8_All	0.25	0.35	0.44	1.65	1.29	2
CL10753.Contig9_All	0	0	0	0.24	0.05	0.19
CL10754.Contig1_All	5.28	4.53	4.73	1.27	1.11	1.3
CL10754.Contig2_All	4.6	4.04	4.17	8	6.84	6.14
CL10755.Contig1_All	2.63	2.3	4.43	15.12	15.34	14.38
CL10755.Contig4_All	4.16	4.75	2.87	0.22	0.29	0.27
CL10757.Contig1_All	0.86	1.08	1.12	5	6.92	6.81
CL10758.Contig1_All	4.34	2.89	3.68	0	0	0
CL10758.Contig3_All	1.22	0.21	0.2	2.77	2.33	2.85
CL10758.Contig4_All	0.81	1.37	0.37	0	0	0
CL1076.Contig2_All	4.54	3.49	3.19	6.79	6.13	5.52
CL1076.Contig3_All	26.39	25.24	25.01	5.48	5.46	6.18
CL1076.Contig4_All	14.28	12.41	13.15	10.18	8.77	9.46
CL1076.Contig6_All	1.66	1.71	2.13	3.9	3.68	4.56
CL10761.Contig1_All	0.37	0.37	0.89	3.05	1.6	1.09
CL10761.Contig2_All	0.17	0	0.09	0.58	1.07	0.76
CL10762.Contig1_All	0.05	0.16	0.15	12.3	15.25	11.8
CL10762.Contig3_All	5.2	4.58	3.79	19.86	19.05	18.25
CL10762.Contig4_All	25.91	26.49	25.48	30.72	33.12	30.97
CL10764.Contig1_All	1.99	2.22	2.37	7.63	7.95	7.35
CL10764.Contig2_All	9.24	12.16	9.74	4.58	4.74	3.71
CL10765.Contig1_All	0.18	0.1	0.13	0	0	0
CL10766.Contig2_All	0.79	0.61	0.53	0	0	0.13
CL10766.Contig3_All	0.61	0.59	0.26	4.57	4.71	3.62
CL10767.Contig1_All	10.42	11.03	10.78	7.74	7.28	7.31
[truncated: 79,949 more rows]

## Sheet: E2 vs M2
Gene ID	E2_r1 FPKM	E2_r2 FPKM	E2_r3 FPKM	M2_r1 FPKM	M2_r2 FPKM	M2_r3 FPKM
CL5024.Contig6_All	1.27	1.83	0.86	5.24	4.42	4.95
Unigene20442_All	1.67	1.39	1.32	0	0	0
CL1641.Contig5_All	0.65	0.24	0.4	1.06	1.24	1.62
Unigene57089_All	0.71	0.54	0.35	2.69	2.14	1.96
CL1515.Contig2_All	5.91	4.92	5.24	0.72	0.57	0.82
Unigene56770_All	6.69	7.09	6.51	11.49	11.06	11.99
Unigene56043_All	1.14	0.55	0.57	2.57	2.21	2.31
Unigene17101_All	3.1	2.7	2.2	4.38	4.65	4.95
CL9620.Contig2_All	0.52	0.79	0.54	21.18	16.71	18.06
CL12556.Contig23_All	0	0	0	3.11	3.36	3.59
CL8022.Contig6_All	4.85	3.62	4.76	1.25	1.82	0.95
Unigene52904_All	0.15	0.16	0	1.13	2.54	2.81
CL4447.Contig6_All	139.72	138.44	146.66	103.9	103.41	109.4
Unigene49519_All	0	0	0.25	2.01	1	1.98
CL4051.Contig57_All	1.02	0.76	0.96	1.61	1.49	2.06
Unigene19619_All	1	1.44	1.29	0.75	0.68	0.82
CL396.Contig1_All	2.32	2.36	1.73	0	0	0
CL5731.Contig3_All	10.82	11.63	9.24	2.33	2.93	2.48
Unigene26506_All	0.83	1.04	0.67	3.06	2.73	2.83
CL232.Contig48_All	1.77	2.04	1.9	2.8	2.91	3.1
CL8120.Contig3_All	0.98	1.73	1.16	0.25	0.8	0.67
Unigene31408_All	0	0	0	1.36	1.47	1.51
Unigene38142_All	0	0	0	0.38	0.75	1.13
CL628.Contig4_All	0.15	0.08	0.03	6.04	6.53	5.02
CL8417.Contig2_All	1.64	1.75	1.66	0.12	0.29	0.08
Unigene27361_All	1.84	1.12	1.5	4.32	4.62	4.55
Unigene48613_All	2.92	3.11	2.71	1.41	1.52	1.17
Unigene32430_All	0	0	0.06	3.88	4.12	3.76
CL3823.Contig5_All	4.27	3.78	3.83	2.75	3	3.71
Unigene37294_All	0	0	0.15	0.31	0.92	1.22
CL1953.Contig1_All	1.44	1.87	1.65	6.77	8.63	8.68
CL12505.Contig1_All	2.12	1.74	2.2	1.33	1.05	1.24
CL14533.Contig16_All	0.07	0.22	0.51	1.01	0.79	1.62
CL482.Contig4_All	1.57	1.42	1.39	7.49	7.58	8.32
Unigene2530_All	2.32	0.78	0	0	0	0
Unigene48779_All	12.39	12.79	12.7	11.32	8.59	9.55
CL15513.Contig47_All	2.55	2.35	2.37	3.33	3.93	4.05
CL15367.Contig7_All	0.06	0.34	0.11	2.98	1.58	2.96
CL6232.Contig1_All	20.41	20.74	21.02	17.29	14.14	15.39
CL4738.Contig2_All	1.29	1.14	1.33	5.12	5.14	4.61
Unigene3978_All	1.46	1.09	1.24	7.13	6.66	6.84
Unigene24435_All	4.85	3.49	3.63	3.5	2.14	2.34
CL111.Contig2_All	7.17	7	5.35	12.43	10.77	12.05
CL8018.Contig2_All	10.51	10.79	10.37	1.6	1.87	1.44
CL7533.Contig2_All	4.34	4.88	4.05	7.14	7.26	7.26
CL5812.Contig3_All	3.95	2.64	3.11	4.59	5.15	4.85
Unigene32853_All	0	0	0	0.53	2.58	1.49
CL3961.Contig7_All	0.89	1	0.76	0.04	0.05	0.1
CL2119.Contig8_All	0.72	0.67	0.92	1.14	1.64	1.26
CL12949.Contig2_All	1.09	1.4	0.92	0.67	0.52	0.55
CL3633.Contig2_All	5.95	6.01	4.79	1.97	2.17	2.42
Unigene38190_All	0.21	0.43	0.21	3.22	1.92	2.54
Unigene20824_All	43.26	42.13	40.62	37.69	39.31	40.37
CL2170.Contig2_All	2.17	2.86	2.87	0.76	0.77	0.55
Unigene6264_All	0.18	0.34	0.29	0.95	0.88	0.97
CL14330.Contig1_All	0.54	0.37	1.59	2.3	2.69	2.05
Unigene43794_All	3.56	3.14	3.2	0.92	0.81	1.27
CL3086.Contig7_All	9.62	8.47	7.09	16.09	16.19	18.75
CL1085.Contig8_All	1.86	1.47	1.23	0.71	0.41	0.39
CL7947.Contig3_All	8.22	7.78	7.79	11.89	12.29	11.88
CL12893.Contig1_All	7.25	2.89	5	17.18	15.09	16.72
Unigene36889_All	3.53	3.61	3.92	3.11	2.78	2.79
Unigene3379_All	3.41	3.46	3.44	5.92	5.32	5.24
Unigene27004_All	0.3	0.22	0	0.03	0	0
Unigene45082_All	3.74	3.41	3.26	0.36	0.4	0.69
CL15019.Contig11_All	0	0	0	2.69	4.01	3.15
CL8662.Contig1_All	1.94	1.4	1.68	0.61	0.64	0.77
Unigene23257_All	0.19	0.11	0.21	0.42	0.79	0.72
Unigene43334_All	6.54	6.44	6.09	3.77	3.87	4.66
CL5102.Contig17_All	0	0.11	0.05	1.03	1.01	0.53
Unigene11841_All	0.17	0.15	0.07	0.33	0.35	0.29
CL5576.Contig8_All	74.66	72.67	69.73	5.66	5.03	4.69
CL5365.Contig4_All	2.27	2.49	2.5	4.02	3.66	3.65
CL13508.Contig2_All	8.7	9.3	8.5	15.54	14.41	15.04
CL5253.Contig4_All	5.04	5.15	4.57	0.03	0	0.04
CL4204.Contig1_All	11.79	11.67	11.49	4.75	3.42	4.09
CL5177.Contig5_All	2.71	3.57	3.03	7.48	6.39	5.59
Unigene30086_All	0	0	0	42.53	45.47	44.17
Unigene2221_All	3.11	4.73	2.29	0	0	0
Unigene40701_All	0.8	0.81	0.8	2.61	1.51	2.32
CL2316.Contig8_All	6.44	4.53	5.15	16.23	14.98	14.71
CL15317.Contig32_All	0.05	0.1	0.06	1.91	2.67	2.41
CL109.Contig1_All	8.06	7.25	7.66	0.11	0.22	0.18
Unigene3304_All	2.68	2.61	2.74	0.9	0.93	0.96
Unigene25336_All	0.63	0.36	0.43	0	0	0.08
CL15386.Contig5_All	1.12	1.01	1.56	3.9	3.59	4.94
Unigene16603_All	1.65	0.72	0.83	0.35	0	0.38
CL512.Contig5_All	2.73	1.73	2.79	0	0	0
CL623.Contig10_All	2.62	2.33	2.37	0	0	0.03
CL1263.Contig20_All	0	0	0	0.41	0.74	0.98
CL13394.Contig22_All	10.16	10.09	9.7	4.86	3.88	4.69
CL15199.Contig2_All	0	0	0	4.34	4.42	4.59
Unigene3530_All	1.83	1.59	2.17	3.72	4.9	4.31
CL9037.Contig3_All	2.13	2.68	2.58	0.03	0.24	0.03
Unigene26774_All	1.97	0.46	0.76	0	0	0
Unigene29489_All	0	0	0	1.76	1.86	2.94
CL320.Contig30_All	0.4	0.43	0.58	1.27	1.47	1.92
Unigene45789_All	4.44	4.65	4.8	2.6	2.62	2.52
Unigene6994_All	0.18	0	0.35	7	7.33	6.76
CL10079.Contig1_All	3.05	3	1.97	0.76	0.65	0.89
CL13545.Contig2_All	14.56	15.87	14.53	0	0	0
CL13791.Contig1_All	3.18	2.24	3.14	0.18	0	0
Unigene48839_All	1.76	2.31	1.53	0	0	0.14
CL2150.Contig2_All	0.99	1.4	1.03	0.94	0.81	0.53
Unigene45463_All	4.37	4.02	3.62	1.72	2.21	1.33
Unigene1606_All	0	0	0	1.14	0.49	1.95
CL14907.Contig1_All	0.94	0.39	0.32	1.1	2.01	1.83
CL2187.Contig3_All	0.56	0.24	0.37	1.05	1	1.56
Unigene53863_All	13.26	12.95	13.27	1.89	1.98	1.28
Unigene30907_All	0.05	0	0	2.98	1.7	3.02
CL1746.Contig49_All	0.38	0.5	0.87	3.7	4.14	4.36
CL3493.Contig11_All	1.77	1.61	1.8	16.89	17.15	16.49
Unigene45389_All	0.41	0.45	0.57	0.97	1.23	1.08
CL589.Contig4_All	6.56	5.96	6.52	5.3	5.27	5.24
CL9006.Contig7_All	8.74	9.33	8.14	0.38	0.23	0.23
Unigene51489_All	26.22	26.75	26.31	10.7	12.78	10.39
CL332.Contig7_All	0.43	0.42	0.48	0.69	0.92	1.14
CL5936.Contig1_All	1.94	1.4	1.92	0.56	0.28	0.28
CL500.Contig2_All	3.49	3.52	3.87	1.17	1.48	1.08
CL7917.Contig4_All	0.44	1.14	0.5	0.19	0.26	0.27
Unigene26327_All	3.54	2.26	3	0	0	0
Unigene15211_All	7.28	6.4	6.16	6.72	5.25	5.15
CL1606.Contig6_All	0.92	0.84	1.05	0.28	0.31	0.43
CL882.Contig12_All	5.72	6.1	6.15	5.96	5.98	5.39
Unigene30871_All	0.64	0.91	1	0	0	0
Unigene27960_All	0.3	0	0.06	8.53	8.04	10.67
Unigene18624_All	0.99	0.64	1.09	0.24	0.37	0.17
Unigene8165_All	18.11	16.86	18.73	16.72	14.1	16.39
CL5470.Contig3_All	11.67	8.62	9.25	58.71	58.29	60.31
CL2388.Contig7_All	3.81	3.59	3.69	6.04	4.83	5.5
CL10182.Contig6_All	4.18	5.32	4.43	8.96	9.09	8.92
CL3702.Contig28_All	0.9	0.84	0.95	0.2	0.17	0.37
CL255.Contig17_All	18.33	16.21	18.24	0.36	0.21	0.32
CL11044.Contig2_All	6.89	7.56	6.45	3.15	4.43	4.41
Unigene51060_All	4.81	4.07	4.15	3.56	3.15	2.67
[truncated: 88,777 more rows]

## Sheet: L1 vs L2
Gene ID	L1_r1 FPKM	L1_r2 FPKM	L1_r3 FPKM	L2_r1 FPKM	L2_r2 FPKM	L2_r3 FPKM
[truncated: 56,007 more rows]

[truncated: 3 more sheets: M1 vs L1, M1 vs M2, M2 vs L2]
